# Supplementary material for: Mismatch repair deficiency endows tumors with a unique mutation signature and sensitivity to DNA double-strand breaks
Source: eLife. 2014 Aug 1;3:e02725. doi: 10.7554/eLife.02725 (PMC4141275; doi:10.7554/eLife.02725)
Supplement: Figure 4—source data 3. — DOI: http://dx.doi.org/10.7554/eLife.02725.022 [file elife02725s006.xlsx]

## Sheet: Exonic indels
Somatic indels in homopolymers together with their recurrence rate as identified by whole-exome and whole-genome sequencing (n=16)
Nr of affected samples	Gene	Chromosome	Start Position	Affacted homopolymer base	Affected homopolymer length	Cancer Census Gene	Nr of insertions	Nr of deletions	Evidence
10	SEC31A	4	83785565	T	9		0	10	T/-;TT/-;T/-;T/-;T/-;T/-;T/-;T/-;T/-;T/-
9	RPL22	1	6257785	T	8	x	1	8	-/T;T/-;T/-;T/-;T/-;T/-;T/-;T/-;T/-
9	MYL1	2	211179766	T	11		0	9	T/-;T/-;T/-;T/-;T/-;TT/-;T/-;T/-;T/-
9	ASTE1	3	130733047	T	11		0	9	TT/-;T/-;T/-;TT/-;T/-;T/-;T/-;T/-;T/-
9	TTK	6	80751897	A	9		0	9	A/-;A/-;A/-;A/-;A/-;A/-;A/-;AG/-;A/-
9	CASP5	11	104879687	T	10		2	7	-/T;TT/-;-/T;T/-;T/-;T/-;T/-;T/-;T/-
9	SETD1B	12	122242658	C	8		0	9	C/-;C/-;C/-;C/-;C/-;C/-;C/-;C/-;C/-
8	CNOT2	12	70747694	A	25		0	8	AAAAAAAAAA/-;AAAAG/-;AAAAAAAA/-;AAA/-;AAAAA/-;AAAAAAAA/-;AAAAAAAAAA/-;AAAAAAAAA/-
8	OR7E24	19	9361741	T	11		0	8	T/-;T/-;T/-;T/-;T/-;T/-;T/-;T/-
8	LTN1	21	30339206	T	11		0	8	T/-;T/-;T/-;T/-;T/-;T/-;TT/-;T/-
7	RNPC3	1	104076467	A	12		1	6	A/-;A/-;-/A;A/-;A/-;AA/-;AA/-
7	MSH6	2	48030640	C	8	x	4	3	-/C;C/-;C/-;C/-;-/C;-/C;-/C
7	CCDC150	2	197531519	A	11		1	6	A/-;-/A;A/-;A/-;AA/-;A/-;A/-
7	TGFBR2	3	30691872	A	10		0	7	A/-;A/-;A/-;A/-;A/-;A/-;AA/-
7	KIAA2018	3	113377482	T	11		0	7	TT/-;T/-;T/-;T/-;T/-;TT/-;T/-
7	MBD4	3	129155548	T	10		1	6	T/-;T/-;T/-;-/T;T/-;T/-;T/-
7	TMBIM4	12	66531937	A	10		1	6	A/-;A/-;A/-;A/-;-/A;A/-;A/-
7	C15orf40	15	83677271	A	14		3	4	AA/-;-/AA;AAA/-;-/AA;A/-;A/-;-/AA
6	TAF1B	2	9989571	A	11		0	6	AA/-;A/-;A/-;A/-;A/-;A/-
6	SLC35F5	2	114500277	A	10		1	5	-/A;A/-;A/-;A/-;A/-;A/-
6	ATR	3	142274740	T	10		0	6	T/-;T/-;T/-;T/-;T/-;T/-
6	CLOCK	4	56336954	A	9		3	3	AA/-;-/A;-/A;-/A;A/-;A/-
6	RNF145	5	158630630	T	11		1	5	T/-;T/-;-/T;T/-;T/-;T/-
6	GRIK2	6	102503432	A	8		1	5	-/A;A/-;A/-;A/-;A/-;A/-
6	TMEM60	7	77423460	T	9		0	6	T/-;T/-;T/-;TT/-;T/-;T/-
6	PRKDC	8	48866910	T	10		1	5	T/-;T/-;T/-;T/-;T/-;-/T
6	PHF2	9	96422612	A	8		0	6	A/-;A/-;A/-;A/-;A/-;A/-
6	BRD3	9	136918529	G	8	x	3	3	-/G;-/G;G/-;G/-;-/G;G/-
6	SLC22A9	11	63149671	A	11		0	6	AA/-;A/-;A/-;A/-;A/-;AA/-
6	NDUFC2,NDUFC2-KCTD14	11	77784147	A	9		0	6	A/-;A/-;A/-;A/-;A/-;A/-
6	CASP5	11	104878041	T	10		3	3	T/-;-/T;T/-;T/-;-/T;-/T
6	MIS18BP1	14	45716019	T	11		1	5	-/T;T/-;T/-;T/-;T/-;T/-
6	KIAA0182	16	85682290	C	8		6	0	-/C;-/C;-/C;-/C;-/C;-/C
6	CDH26	20	58587784	A	10		1	5	AA/-;-/A;A/-;A/-;A/-;A/-
5	RBMXL1	1	89449509	T	11		0	5	T/-;T/-;T/-;T/-;TT/-
5	AIM2	1	159032487	T	10		2	3	T/-;-/T;-/T;T/-;T/-
5	ACVR2A	2	148683686	A	8		0	5	A/-;A/-;A/-;A/-;A/-
5	COBLL1	2	165551296	A	9		1	4	A/-;-/A;A/-;A/-;A/-
5	DOCK3	3	51417604	C	7		0	5	C/-;C/-;C/-;C/-;C/-
5	FETUB	3	186362544	A	9		1	4	-/A;A/-;A/-;A/-;A/-
5	RGS12	4	3430399	A	9		0	5	A/-;A/-;A/-;A/-;A/-
5	KIAA1919	6	111587361	T	9		0	5	T/-;T/-;T/-;T/-;T/-
5	IGF2R	6	160485488	G	8		3	2	-/G;G/-;-/G;G/-;-/GG
5	MAP3K4	6	161469776	A	8		0	5	A/-;A/-;A/-;A/-;A/-
5	MLL3	7	151874148	T	9	x	1	4	-/T;T/-;T/-;T/-;T/-
5	UBR5	8	103289349	T	8		1	4	T/-;T/-;T/-;T/-;-/T
5	FAM111B	11	58892377	A	10		0	5	A/-;A/-;A/-;A/-;A/-
5	UVRAG	11	75694431	A	10		0	5	A/-;A/-;A/-;A/-;A/-
5	CCDC168	13	103381996	A	9		2	3	A/-;A/-;-/A;-/A;A/-
5	JPH4	14	24040436	C	9		2	3	-/C;-/CC;C/-;C/-;C/-
5	FAM18A	16	10867203	A	9		1	4	A/-;A/-;A/-;-/A;A/-
5	PRRT2	16	29825016	C	9		4	1	-/CC;-/C;-/C;C/-;-/C
5	CTCF	16	67645339	A	7		5	0	-/A;-/A;-/A;-/A;-/A
5	DDX27	20	47858504	A	8		1	4	A/-;A/-;A/-;-/G;A/-
5	NRIP1	21	16338330	T	8		0	5	T/-;T/-;T/-;T/-;T/-
5	PRRG1	X	37312611	C	8		1	4	-/C;C/-;C/-;C/-;C/-
4	WDTC1	1	27621108	G	8		2	2	G/-;-/G;G/-;-/G
4	JAK1	1	65325833	G	7	x	2	2	-/G;-/G;G/-;G/-
4	GBP3	1	89473442	T	10		0	4	T/-;T/-;T/-;T/-
4	SMC6	2	17898126	T	9		2	2	-/T;T/-;-/T;T/-
4	RBM43	2	152108088	T	10		0	4	T/-;T/-;T/-;T/-
4	RG9MTD1	3	101284009	A	10		1	3	A/-;A/-;-/A;A/-
4	ZBTB20	3	114058003	G	7		0	4	G/-;G/-;G/-;G/-
4	FGFBP1	4	15938178	T	9		2	2	T/-;-/T;-/C;T/-
4	EXOSC9	4	122723894	T	8		0	4	T/-;T/-;T/-;T/-
4	MYO10	5	16694606	C	8		2	2	-/C;C/-;C/-;-/C
4	SEC63	6	108214755	T	10		0	4	T/-;T/-;T/-;T/-
4	CYHR1	8	145689659	C	9		1	3	-/C;C/-;C/-;C/-
4	HPS1	10	100186987	G	8		0	4	G/-;G/-;G/-;G/-
4	CEP164	11	117222648	A	11		0	4	A/-;A/-;A/-;A/-
4	SRPR	11	126137087	T	8		1	3	-/T;T/-;T/-;T/-
4	RFC3	13	34398063	A	10		1	3	AA/-;-/A;A/-;A/-
4	C14orf39	14	60903565	A	8		0	4	A/-;A/-;A/-;A/-
4	MYH11	16	15802687	G	8	x	1	3	G/-;G/-;-/G;G/-
4	INO80E	16	30016653	C	9		1	3	C/-;-/C;C/-;C/-
4	SPECC1	17	20108263	A	8		1	3	A/-;A/-;A/-;-/A
4	PRR11	17	57247171	A	9		0	4	A/-;A/-;A/-;A/-
4	ELAVL3	19	11577605	C	9		2	2	C/-;-/C;-/C;C/-
4	GLTSCR1	19	48197891	C	8		0	4	C/-;C/-;C/-;C/-
4	SLC23A2	20	4850569	G	9		1	3	-/G;GG/-;G/-;GG/-
4	OSBPL2	20	60854258	C	7		3	1	C/-;-/C;-/C;-/C
4	ZDHHC8	22	20130522	C	6		0	4	C/-;C/-;C/-;C/-
4	TEX11	X	70127618	A	8		0	4	A/-;A/-;A/-;A/-
3	ARID1A	1	27105931	G	7	x	2	1	-/G;-/GG;G/-
3	PHACTR4	1	28785730	A	10		0	3	A/-;A/-;A/-
3	ZMYM4	1	35846960	A	9		2	1	-/A;-/A;A/-
3	EIF2B3	1	45407182	T	9		0	3	T/-;T/-;T/-
3	C1orf168	1	57192199	T	8		1	2	-/T;T/-;T/-
3	CDC7	1	91967357	A	9		0	3	A/-;A/-;A/-
3	CCDC18	1	93667516	A	9		1	2	-/A;A/-;A/-
3	HIAT1	1	100534122	T	8		0	3	T/-;T/-;T/-
3	ADAMTSL4	1	150530506	G	8		0	3	G/-;G/-;G/-
3	NES	1	156642804	G	7		0	3	G/-;G/-;G/-
3	SLAMF1	1	160589601	T	9		1	2	-/T;T/-;T/-
3	ARV1	1	231131567	A	9		1	2	A/-;A/-;-/A
3	2007-03-01	2	160604680	T	8		0	3	T/-;T/-;T/-
3	NBEAL1	2	203922058	A	9		0	3	A/-;A/-;A/-
3	SLC4A3	2	220494111	C	7		3	0	-/CC;-/C;-/C
3	USP40	2	234394237	T	9		1	2	T/-;T/-;-/T
3	USP40	2	234474223	A	7		0	3	A/-;A/-;A/-
3	UGT1A3	2	234638283	T	8		1	2	T/-;T/-;-/T
3	P4HTM	3	49043193	C	7		1	2	-/C;C/-;C/-
3	TRIM59	3	160156368	T	10		0	3	T/-;T/-;T/-
3	WHSC1	4	1980559	C	8	x	3	0	-/C;-/C;-/C
3	GRK4	4	3015470	A	9		0	3	A/-;A/-;A/-
3	SCLT1	4	129869675	T	8		1	2	T/-;T/-;-/T
3	RAPGEF2	4	160271311	A	8		0	3	A/-;A/-;A/-
3	ZFR	5	32404161	T	9		1	2	-/T;TT/-;T/-
3	SPEF2	5	35705894	A	9		0	3	A/-;A/-;A/-
3	MSH3	5	79970915	A	8		1	2	A/-;-/A;A/-
3	RAD50	5	131931452	A	9		2	1	-/A;A/-;-/A
3	WDR55	5	140049102	A	8		1	2	A/-;A/-;-/A
3	RBM27	5	145647320	A	9		0	3	A/-;A/-;A/-
3	SPINK5	5	147499875	A	10		0	3	A/-;A/-;A/-
3	OR2J2	6	29141422	A	8		0	3	A/-;A/-;A/-
3	ABCF1	6	30545854	A	10		0	3	A/-;A/-;A/-
3	CCDC28A	6	139097330	A	8		0	3	A/-;A/-;A/-
3	TMEM196	7	19769017	T	9		0	3	T/-;T/-;T/-
3	FAM133B	7	92207638	T	7		1	2	-/T;T/-;T/-
3	CASD1	7	94174999	A	8		0	3	A/-;A/-;A/-
3	NYAP1	7	100087052	G	7		2	1	-/G;-/G;G/-
3	SRRT	7	100479332	G	8		2	1	-/GGG;-/G;G/-
3	AP1S1	7	100802405	G	8		0	3	G/-;G/-;G/-
3	THAP5	7	108205526	T	9		0	3	T/-;T/-;T/-
3	BRAF	7	140482927	G	7	x	2	1	G/-;-/G;-/GGG
3	MCPH1	8	6302639	A	7		0	3	A/-;A/-;A/-
3	GOT1L1	8	37791834	T	9		2	1	-/T;T/-;-/T
3	CHD7	8	61778454	G	7		0	3	G/-;G/-;G/-
3	PIGO	9	35091693	G	7		0	3	G/-;G/-;G/-
3	ANKRD20A4	9	69421905	A	8		0	3	A/-;A/-;A/-
3	TEX10	9	103111633	T	7		0	3	T/-;T/-;T/-
3	DAB2IP	9	124536637	C	8		2	1	-/CC;C/-;-/C
3	RABGAP1	9	125861042	A	8		1	2	A/-;A/-;-/A
3	RUFY2	10	70156583	T	9		1	2	T/-;TT/-;-/T
3	PTEN	10	89717770	A	6	x	2	1	-/A;-/A;A/-
3	PAX2	10	102587324	C	6		0	3	C/-;C/-;C/-
3	ADD3	10	111893350	A	8		0	3	A/-;A/-;A/-
3	OR52N5	11	5799652	A	10		1	2	A/-;-/A;A/-
3	SPRYD5	11	55653610	A	8		0	3	A/-;A/-;A/-
3	ROM1	11	62381084	G	9		2	1	G/-;-/G;-/G
3	POLD3	11	74336609	A	9		0	3	A/-;A/-;A/-
3	C11orf57	11	111953289	A	8		0	3	A/-;A/-;A/-
3	CD3G	11	118220583	A	9		0	3	A/-;A/-;A/-
3	WNK1	12	970297	A	10		0	3	AA/-;A/-;A/-
3	ATF7IP	12	14577802	A	7		3	0	-/A;-/A;-/A
3	SENP1	12	48458896	T	8		0	3	T/-;T/-;T/-
3	MYO1A	12	57422573	T	8		0	3	T/-;T/-;T/-
3	GLI1	12	57860075	G	7		1	2	G/-;G/-;-/G
3	MBD6	12	57921732	G	8		2	1	-/G;G/-;-/G
3	CEP290	12	88524079	T	8		3	0	-/T;-/T;-/T
3	SYCP3	12	102122901	T	9		0	3	T/-;T/-;T/-
3	FOXN3	14	89878534	G	7		2	1	-/G;G/-;-/G
3	ATG2B	14	96783572	T	9		0	3	T/-;T/-;T/-
3	C15orf52	15	40631782	C	7		1	2	-/C;C/-;C/-
3	FAM214A	15	52901069	T	8		0	3	T/-;T/-;T/-
3	PIGB	15	55631503	T	8		0	3	T/-;T/-;T/-
3	SCAPER	15	76958026	T	9		0	3	T/-;T/-;T/-
3	KIAA1024	15	79750586	A	8		0	3	A/-;A/-;A/-
3	TNRC6A	16	24802366	G	7		1	2	G/-;-/G;G/-
3	ADAMTS18	16	77356311	A	9		0	3	A/-;A/-;A/-
3	TCF25	16	89951020	A	9		1	2	A/-;A/-;-/A
3	TMEM97	17	26653807	A	10		1	2	A/-;-/A;A/-
3	STAT5B	17	40370236	G	8		2	1	-/G;G/-;-/G
3	COIL	17	55028016	T	8		0	3	T/-;T/-;T/-
3	C18orf34	18	30913143	T	10		0	3	TT/-;T/-;T/-
3	HNRNPL	19	39330959	G	8		1	2	G/-;-/G;G/-
3	BAX	19	49458971	G	8		1	2	G/-;-/G;G/-
3	ZHX3	20	39832811	T	6		2	1	-/T;T/-;-/T
3	ZNF831	20	57766220	C	8		1	2	C/-;C/-;-/CC
3	SYCP2	20	58467047	T	9		0	3	TT/-;T/-;T/-
3	TTC3	21	38524243	A	8		0	3	A/-;A/-;A/-
3	TRPM2	21	45786736	G	7		0	3	G/-;G/-;G/-
3	RNF128	X	105937256	T	8		0	3	T/-;T/-;T/-
3	F8	X	154157686	T	8		0	3	T/-;T/-;T/-
2	PRDM2	1	14108749	A	9		0	2	A/-;A/-
2	FHAD1	1	15615974	C	7		0	2	C/-;C/-
2	TCEB3	1	24078404	A	8		0	2	A/-;A/-
2	ARID1A	1	27101268	C	6	x	0	2	C/-;C/-
2	ARID1A	1	27101402	C	6	x	1	1	C/-;-/C
2	DLGAP3	1	35370731	C	8		0	2	C/-;C/-
2	MACF1	1	39853179	A	7		1	1	-/A;A/-
2	PABPC4	1	40028016	G	7		1	1	-/G;G/-
2	PODN	1	53543377	C	6		0	2	C/-;C/-
2	FGGY	1	59812017	G	7		2	0	-/GG;-/G
2	JAK1	1	65306997	T	8	x	0	2	T/-;T/-
2	LRRIQ3	1	74575213	T	9		1	1	-/T;T/-
2	LPAR3	1	85331665	A	9		0	2	A/-;A/-
2	GBP7	1	89613322	C	7		1	1	-/C;C/-
2	BARHL2	1	91182377	G	7		0	2	G/-;GGC/-
2	HFM1	1	91727836	A	7		0	2	A/-;A/-
2	AGL	1	100378028	A	8		0	2	A/-;A/-
2	PHTF1	1	114248546	A	8		0	2	A/-;A/-
2	SIKE1	1	115321811	T	6		0	2	T/-;T/-
2	SYCP1	1	115469134	A	9		0	2	A/-;A/-
2	ASH1L	1	155308000	T	9		1	1	T/-;-/T
2	ISG20L2	1	156694023	G	8		2	0	-/G;-/G
2	OR6P1	1	158533299	A	8		0	2	A/-;A/-
2	C1orf114	1	169366580	T	8		0	2	T/-;T/-
2	FMO2	1	171162627	A	6		1	1	A/-;-/A
2	PRRC2C	1	171511149	A	10		1	1	A/-;-/A
2	SLC9A11	1	173552688	A	8		0	2	A/-;A/-
2	CAMSAP2	1	200827020	A	7		2	0	-/A;-/A
2	CR2	1	207642044	C	7		1	1	C/-;-/C
2	TRIM17	1	228596779	C	8		1	1	-/C;C/-
2	ASAP2	2	9528643	C	7		1	1	-/C;C/-
2	MAPRE3	2	27248517	C	8		1	1	C/-;-/C
2	EMILIN1	2	27305819	G	7		2	0	-/G;-/G
2	SULT6B1	2	37414553	T	8		1	1	-/T;T/-
2	CEBPZ	2	37454908	T	9		0	2	T/-;T/-
2	PKDCC	2	42282438	G	6		0	2	G/-;G/-
2	ZFP36L2	2	43452512	C	6		0	2	C/-;C/-
2	LRPPRC	2	44145165	T	8		0	2	T/-;T/-
2	C2orf73	2	54587451	A	7		1	1	-/A;A/-
2	ZNF638	2	71650549	A	8		0	2	A/-;A/-
2	TLX2	2	74742219	G	7		1	1	-/G;G/-
2	LIPT1	2	99778781	A	8		0	2	AA/-;A/-
2	GCC2	2	109087884	A	8		2	0	-/A;-/AA
2	CCDC138	2	109421455	A	7		0	2	A/-;A/-
2	ACVR2A	2	148657041	A	8		0	2	A/-;A/-
2	TNFAIP6	2	152236046	A	14		0	2	AA/-;AAAAA/-
2	GRB14	2	165365288	T	9		1	1	T/-;-/T
2	XIRP2	2	168099958	G	7		0	2	G/-;G/-
2	LRP2	2	169997025	G	8		2	0	-/G;-/G
2	DCAF17	2	172334538	A	8		1	1	-/A;A/-
2	DYNC1I2	2	172549339	A	9		0	2	A/-;AA/-
2	SGOL2	2	201436992	A	7		0	2	A/-;A/-
2	SGOL2	2	201437004	T	9		1	1	T/-;-/T
2	BMPR2	2	203420130	A	7		0	2	A/-;A/-
2	ZDBF2	2	207174869	A	8		0	2	A/-;A/-
2	ABCA12	2	215843156	T	7		0	2	T/-;T/-
2	CCDC108	2	219883883	G	7		1	1	-/G;G/-
2	DOCK10	2	225738848	T	8		1	1	T/-;-/T
2	SP140	2	231159025	A	8		0	2	A/-;A/-
2	AGXT	2	241808308	C	8		2	0	-/C;-/C
2	SLC6A6	3	14513785	T	8		1	1	T/-;-/T
2	SCN11A	3	38949441	T	7		0	2	T/-;T/-
2	XIRP1	3	39227535	C	6		0	2	C/-;C/-
2	NKTR	3	42679036	C	8		1	1	-/C;C/-
2	ANO10	3	43647213	T	9		0	2	T/-;T/-
2	ATRIP	3	48501288	C	6		0	2	C/-;C/-
2	WDR6	3	49051382	G	7		1	1	G/-;-/G
2	RBM15B	3	51431353	G	7		1	1	G/-;-/G
2	IL17RB	3	53889347	A	8		0	2	A/-;A/-
2	ASB14	3	57322030	A	7		0	2	A/-;A/-
2	DNAH12	3	57509313	T	9		0	2	T/-;T/-
2	FOXP1	3	71027087	G	6	x	0	2	G/-;G/-
2	TBC1D23	3	100039736	A	9		0	2	A/-;A/-
2	ALCAM	3	105250904	A	6		1	1	A/-;-/A
2	EAF2	3	121573569	A	7		0	2	A/-;A/-
2	SLC35G2	3	136573486	A	9		0	2	A/-;A/-
2	DHX36	3	154032978	T	9		0	2	T/-;T/-
2	FXR1	3	180666228	A	8		0	2	A/-;A/-
2	HTT	4	3133117	A	6		0	2	A/-;A/-
2	RGS12	4	3432431	C	8		1	1	-/C;C/-
2	N4BP2	4	40144449	A	8		0	2	A/-;A/-
2	AASDH	4	57220269	A	10		0	2	A/-;A/-
2	YTHDC1	4	69188586	G	6		1	1	-/G;G/-
2	AFM	4	74347532	T	8		1	1	-/T;T/-
2	PKD2	4	88986559	A	8		0	2	A/-;A/-
2	SMARCAD1	4	95173910	A	8		1	1	-/A;A/-
2	HPGDS	4	95223321	C	6		1	1	-/C;C/-
2	PPP3CA	4	102001725	A	6		0	2	A/-;A/-
2	LARP7	4	113578483	A	10		0	2	A/-;A/-
2	PAPD7	5	6755008	A	6		1	1	AC/-;-/AC
2	HEATR7B2	5	41004528	T	8		0	2	T/-;T/-
2	CWC27	5	64181326	A	8		1	1	-/A;A/-
2	PPWD1	5	64865508	A	7		2	0	-/A;-/A
2	CENPH	5	68492902	A	8		0	2	A/-;A/-
2	MARVELD2	5	68736316	A	8		0	2	A/-;A/-
2	ZFYVE16	5	79773189	T	6		0	2	T/-;T/-
2	RAPGEF6	5	130815369	T	9		0	2	T/-;T/-
2	BRD8	5	137505021	G	7		2	0	-/G;-/G
2	PCDHB4	5	140502487	A	9		0	2	A/-;A/-
2	TAF7	5	140699362	T	7		0	2	T/-;T/-
2	PCDHGA12	5	140812776	T	12		0	2	T/-;T/-
2	TCERG1	5	145886723	A	8		0	2	A/-;A/-
2	HMMR	5	162917426	A	9		0	2	A/-;A/-
2	SLC17A2	6	25921520	T	8		1	1	-/T;T/-
2	BTN3A2	6	26373620	A	7		0	2	A/-;A/-
2	ZKSCAN4	6	28212908	T	7		0	2	T/-;T/-
2	RGL2	6	33263965	C	8		1	1	C/-;-/C
2	FANCE	6	35425715	C	7	x	2	0	-/C;-/C
2	FOXP4	6	41555186	C	7		2	0	-/C;-/C
2	KIAA1586	6	56918118	A	7		0	2	A/-;A/-
2	BAI3	6	69349020	T	7		2	0	-/T;-/T
2	KIAA1009	6	84870551	T	7		0	2	T/-;T/-
2	KIAA1009	6	84896233	A	8		1	1	-/A;A/-
2	ZNF292	6	87969484	A	9		0	2	A/-;A/-
2	C6orf165	6	88144700	A	8		0	2	A/-;A/-
2	MCHR2	6	100382358	A	9		0	2	A/-;A/-
2	SOBP	6	107956439	G	6		0	2	G/-;G/-
2	SEC63	6	108214774	T	9		1	1	-/T;T/-
2	RPF2	6	111346774	A	8		0	2	A/-;A/-
2	WISP3	6	112389434	A	9		0	2	AA/-;A/-
2	MARCKS	6	114181210	A	11		0	2	A/-;A/-
2	HDAC2	6	114292040	T	9		0	2	T/-;T/-
2	RNF217	6	125404042	A	6		2	0	-/A;-/A
2	AKAP7	6	131481276	A	8		0	2	A/-;A/-
2	SYNJ2	6	158508009	C	8		0	2	C/-;C/-
2	TULP4	6	158923753	G	7		1	1	-/G;G/-
2	INTS1	7	1527075	G	7		1	1	-/G;G/-
2	USP42	7	6196443	A	8		1	1	-/A;A/-
2	CYTH3	7	6204578	T	6		0	2	T/-;T/-
2	PPP1R17	7	31735179	A	8		1	1	-/A;A/-
2	PHTF2	7	77569581	T	8		1	1	T/-;-/T
2	AKAP9	7	91732039	G	7	x	1	1	-/G;G/-
2	ANKIB1	7	91936914	A	8		0	2	A/-;A/-
2	ZNF800	7	127013702	T	6		0	2	T/-;T/-
2	SMO	7	128852004	C	6	x	0	2	C/-;C/-
2	NOBOX	7	144096190	G	7		0	2	G/-;G/-
2	SSPO	7	149501110	G	7		1	1	-/G;G/-
2	KCNH2	7	150656679	G	7		0	2	G/-;G/-
2	TEX15	8	30700813	T	6		2	0	-/T;-/T
2	PRKDC	8	48746799	T	7		1	1	-/T;T/-
2	PCMTD1	8	52732973	T	6		2	0	-/T;-/T
2	ESRP1	8	95686611	A	8		0	2	A/-;A/-
2	RIMS2	8	104927779	A	7		0	2	A/-;A/-
2	ADAMTSL1	9	18680350	G	8		2	0	-/G;-/G
2	AQP7	9	33385690	G	7		1	1	G/-;-/G
2	FAM219A	9	34401028	G	7		1	1	-/G;G/-
2	CBWD3	9	70900912	A	6		2	0	-/A;-/A
2	ECM2	9	95285119	A	7		1	1	A/-;-/A
2	CRAT	9	131864814	C	7		1	1	-/C;CC/-
2	CEL	9	135946691	C	8		0	2	C/-;C/-
2	WDR5	9	137019598	C	7		1	1	-/C;C/-
2	TPRN	9	140093901	G	6		1	1	G/-;-/G
2	SVIL	10	29760116	C	7		0	2	C/-;C/-
2	C10orf68	10	33018277	A	8		1	1	A/-;-/A
2	TFAM	10	60148570	A	10		0	2	A/-;AA/-
2	ANK3	10	62149221	T	7		0	2	T/-;T/-
2	ARID5B	10	63850705	A	7		2	0	-/A;-/A
2	ZNF365	10	64159513	A	8		0	2	A/-;A/-
2	JMJD1C	10	64952699	T	8		0	2	T/-;T/-
2	CTNNA3	10	67680208	T	7		2	0	-/T;-/T
2	DNA2	10	70182521	A	9		0	2	A/-;A/-
2	KCNMA1	10	78729786	T	9		0	2	T/-;T/-
2	DLG5	10	79570873	G	7		2	0	-/G;-/G
2	ZMIZ1	10	81072446	C	7		0	2	C/-;C/-
2	PTEN	10	89720812	A	6	x	2	0	-/A;-/A
2	RNLS	10	90341967	T	6		0	2	T/-;T/-
2	TNKS2	10	93601946	A	9		0	2	A/-;A/-
2	CPEB3	10	93999920	G	7		1	1	-/G;G/-
2	TM9SF3	10	98325105	T	6		0	2	T/-;T/-
2	PPRC1	10	103901077	C	8		2	0	-/C;-/C
2	TCF7L2	10	114849206	C	7	x	1	1	C/-;-/C
2	TCF7L2	10	114925317	A	9	x	0	2	A/-;A/-
2	CCKBR	11	6292451	T	8		0	2	T/-;T/-
2	KCNC1	11	17794004	A	8		0	2	A/-;A/-
2	KCNA4	11	30033563	A	7		0	2	A/-;A/-
2	PAX6	11	31812317	G	7		0	2	G/-;G/-
2	CKAP5	11	46829683	T	7		0	2	T/-;T/-
2	OR8I2	11	55861308	T	8		1	1	-/T;T/-
2	RTN3	11	63525656	A	8		0	2	A/-;A/-
2	NUMA1	11	71746965	C	6	x	0	2	C/-;C/-
2	INPPL1	11	71948748	C	7		0	2	C/-;C/-
2	TRIM77P	11	89444611	A	9		1	1	-/A;A/-
2	FAT3	11	92531966	T	6		0	2	T/-;T/-
2	KIAA1731	11	93428779	A	8		1	1	A/-;-/A
2	DLAT	11	111896977	A	8		0	2	A/-;A/-
2	APOA1	11	116707832	G	7		0	2	G/-;G/-
2	MLL	11	118344186	C	7	x	1	1	-/C;C/-
2	DPAGT1	11	118969143	A	8		0	2	A/-;A/-
2	CHEK1	11	125505378	A	9		2	0	-/A;-/A
2	IGSF9B	11	133807827	G	7		2	0	-/G;-/G
2	KDM5A	12	416953	T	8	x	1	1	T/-;-/T
2	CHD4	12	6711546	T	7		0	2	T/-;T/-
2	DDX47	12	12974638	A	7		2	0	-/A;-/A
2	KLHDC5	12	27950769	G	7		1	1	G/-;-/G
2	FAM60A	12	31448178	T	9		1	1	-/T;T/-
2	ZCRB1	12	42706971	T	8		0	2	T/-;T/-
2	HDAC7	12	48181527	G	7		0	2	G/-;G/-
2	OR6C65	12	55794610	T	8		2	0	-/T;-/T
2	SMARCC2	12	56559113	G	8		1	1	G/-;-/G
2	MBD6	12	57921002	C	7		0	2	C/-;C/-
2	XPOT	12	64812755	T	9		1	1	T/-;-/T
2	E2F7	12	77449827	T	8		1	1	T/-;-/T
2	LRRIQ1	12	85450035	A	7		0	2	A/-;A/-
2	LRRIQ1	12	85450223	A	6		1	1	A/-;-/A
2	TDG	12	104373729	A	6		2	0	-/A;-/A
2	MVK	12	110019240	C	6		0	2	C/-;C/-
2	VPS37B	12	123351892	G	9		0	2	G/-;G/-
2	TPTE2	13	20041394	A	8		0	2	A/-;A/-
2	WASF3	13	27255387	C	8		1	1	-/C;C/-
2	RXFP2	13	32376429	A	10		1	1	A/-;-/A
2	RCBTB2	13	49089392	T	7		1	1	-/T;T/-
2	EBPL	13	50235209	A	9		0	2	A/-;A/-
2	CKAP2	13	53049034	A	8		0	2	A/-;A/-
2	FBXL3	13	77581683	A	9		0	2	A/-;A/-
2	ARHGEF40	14	21546604	G	7		2	0	-/G;-/G
2	CDH24	14	23523785	C	7		1	1	-/C;C/-
2	HOMEZ	14	23745310	A	8		0	2	A/-;A/-
2	ADCY4	14	24795358	G	6		2	0	-/G;-/G
2	PPP2R3C	14	35585935	T	9		0	2	T/-;T/-
2	CTAGE5	14	39746243	T	8		1	1	T/-;-/T
2	MIS18BP1	14	45693722	T	9		0	2	T/-;T/-
2	ERO1L	14	53118975	T	6		2	0	-/T;-/T
2	ARID4A	14	58814451	A	8		2	0	-/A;-/A
2	PLEKHH1	14	68053850	C	7		1	1	-/C;C/-
2	LTBP2	14	74967607	G	7		1	1	G/-;-/G
2	PTPN21	14	88940113	T	8		0	2	T/-;T/-
2	UNC79	14	94088050	A	8		0	2	A/-;A/-
2	ATG2B	14	96761299	A	6		1	1	A/-;-/A
2	SPTBN5	15	42145897	C	6		0	2	C/-;C/-
2	ZFP106	15	42742957	A	8		0	2	A/-;A/-
2	WDR72	15	53908071	T	7		0	2	T/-;T/-
2	ZNF280D	15	56935186	T	7		1	1	-/T;T/-
2	IGDCC4	15	65681240	G	7		2	0	-/G;-/G
2	SNX33	15	75942736	C	7		1	1	-/C;C/-
2	FAM154B	15	82564107	A	6		0	2	A/-;A/-
2	CHD2	15	93540316	A	10		0	2	A/-;A/-
2	GLYR1	16	4862229	C	8		2	0	-/C;-/C
2	CIITA	16	11001305	C	7	x	1	1	C/-;-/C
2	C16orf88	16	19725706	T	10		0	2	T/-;T/-
2	IL21R	16	27460530	C	7	x	1	1	-/C;C/-
2	SH2B1	16	28883208	C	7		0	2	C/-;C/-
2	MAZ	16	29821006	G	8		1	1	-/GG;G/-
2	KCTD13	16	29923364	T	6		0	2	T/-;T/-
2	ZNF469	16	88504203	G	8		2	0	-/G;-/G
2	FXR2	17	7496122	G	8		1	1	-/G;G/-
2	EFNB3	17	7608923	C	7		0	2	C/-;C/-
2	CHD3	17	7798765	C	7		0	2	C/-;C/-
2	UBB	17	16285785	C	7		2	0	-/C;-/C
2	HNF1B	17	36059174	G	7		1	1	-/G;G/-
2	GPR179	17	36485586	T	7		0	2	T/-;T/-
2	ARHGAP23	17	36636045	G	6		0	2	G/-;G/-
2	CCDC43	17	42756253	T	9		0	2	T/-;T/-
2	HOXB7	17	46688090	C	8		2	0	-/C;-/C
2	SPAG9	17	49077041	T	9		0	2	T/-;T/-
2	RNF43	17	56435161	C	7	x	1	1	-/CC;C/-
2	TBX4	17	59560345	C	7		0	2	C/-;C/-
2	INTS2	17	59945339	A	7		1	1	-/A;A/-
2	AXIN2	17	63532585	C	7		2	0	-/C;-/C
2	UNK	17	73814802	C	7		1	1	-/C;C/-
2	TNRC6C	17	76046980	A	8		0	2	A/-;A/-
2	RNMT	18	13746253	A	7		0	2	A/-;A/-
2	ROCK1	18	18533679	T	8		0	2	T/-;T/-
2	OSBPL1A	18	21750331	T	8		1	1	-/T;T/-
2	MOCOS	18	33848647	A	8		0	2	A/-;A/-
2	FHOD3	18	34205516	C	6		0	2	C/-;C/-
2	LMAN1	18	57013194	T	9		1	1	T/-;-/T
2	SERPINB10	18	61584739	A	9		0	2	A/-;A/-
2	ODF3L2	19	464141	G	8		1	1	G/-;-/G
2	FGF22	19	643528	G	8		0	2	G/-;G/-
2	SAFB2	19	5587282	G	8		0	2	G/-;G/-
2	DENND1C	19	6477251	G	9		1	1	G/-;-/G
2	SNAPC2	19	7987519	C	7		2	0	-/C;-/C
2	MLL4	19	36223002	G	6		0	2	G/-;G/-
2	WDR87	19	38376035	T	8		1	1	-/T;T/-
2	ZFP36	19	39899071	C	6		0	2	C/-;C/-
2	TMEM143	19	48866688	G	7		1	1	G/-;-/G
2	LMTK3	19	48994758	G	8		2	0	-/G;-/G
2	TEAD2	19	49850473	G	8		1	1	-/G;G/-
2	ZNF814	19	58385954	T	8		2	0	-/T;-/T
2	ESF1	20	13763275	T	8		2	0	-/TT;-/T
2	CST1	20	23729754	C	7		2	0	-/C;-/C
2	ASXL1	20	31022442	G	8	x	1	1	G/-;-/G
2	BPIFB4	20	31671214	C	8		1	1	-/C;C/-
2	PMEPA1	20	56227349	G	7		2	0	-/G;-/G
2	C20orf85	20	56735727	C	7		0	2	C/-;C/-
2	SYCP2	20	58452519	T	9		0	2	T/-;T/-
2	KRTAP25-1	21	31661780	A	8		0	2	A/-;A/-
2	GART	21	34882122	T	10		1	1	-/T;T/-
2	ITSN1	21	35122567	C	7		1	1	C/-;-/C
2	AIRE	21	45710773	G	6		0	2	G/-;G/-
2	DNAJB7	22	41257115	T	8		0	2	T/-;T/-
2	CYP2D6	22	42524214	G	7		1	1	G/-;-/G
2	FAM9A	X	8764320	T	9		0	2	T/-;T/-
2	MAGEB3	X	30254501	A	6		0	2	A/-;A/-
2	EFHC2	X	44094660	A	7		2	0	-/A;-/A
2	IQSEC2	X	53263449	G	7		0	2	G/-;G/-
2	UBQLN2	X	56591874	C	7		0	2	C/-;C/-
2	ZNF711	X	84526788	A	7		2	0	-/A;-/A
2	PCDH19	X	99662505	G	7		0	2	G/-;GG/-
2	TBC1D8B	X	106117115	T	6		0	2	T/-;T/-
2	IRS4	X	107977803	C	8		1	1	-/C;C/-
2	DDX26B	X	134680317	T	8		0	2	T/-;T/-
2	PLXNB3	X	153042691	G	8		0	2	G/-;G/-
1	SAMD11	1	878724	G	6		1	0	-/G
1	AGRN	1	981861	C	8		0	1	C/-
1	TTLL10	1	1115643	G	6		1	0	-/G
1	B3GALT6	1	1168240	G	7		1	0	-/G
1	TAS1R3	1	1266836	G	7		0	1	G/-
1	DVL1	1	1271642	C	7		0	1	C/-
1	MMEL1	1	2560840	C	7		1	0	-/C
1	MEGF6	1	3496417	G	6		0	1	G/-
1	RPL22	1	6257794	C	6	x	1	0	-/C
1	ERRFI1	1	8073804	G	6		0	1	G/-
1	SLC25A33	1	9640225	T	7		1	0	-/T
1	UBE4B	1	10177642	A	8		0	1	A/-
1	C1orf127	1	11007833	C	6		0	1	C/-
1	MASP2	1	11107023	G	6		0	1	G/-
1	EXOSC10	1	11128120	T	7		0	1	T/-
1	EXOSC10	1	11159888	T	6		1	0	-/T
1	PRDM2	1	14059336	A	7		0	1	A/-
1	SPEN	1	16255883	A	7		0	1	A/-
1	SPEN	1	16258894	C	6		0	1	C/-
1	FAM131C	1	16384996	G	6		0	1	G/-
1	EPHA2	1	16462199	G	6		0	1	G/-
1	RCC2	1	17739654	C	6		1	0	-/C
1	C1orf151-NBL1,NBL1	1	19983588	C	6		0	1	C/-
1	HSPG2	1	22155955	C	6		1	0	-/C
1	EXTL1	1	26357679	C	6		1	0	-/C
1	EXTL1	1	26361838	G	6		1	0	-/G
1	ARID1A	1	27024002	G	6	x	0	1	G/-
1	ARID1A	1	27097622	A	6	x	0	1	A/-
1	ARID1A	1	27100176	C	6	x	1	0	-/C
1	ARID1A	1	27106804	C	6	x	0	1	C/-
1	AHDC1	1	27877505	G	7		0	1	G/-
1	COL16A1	1	32136240	G	6		0	1	G/-
1	TXLNA	1	32646949	G	6		1	0	-/G
1	CSMD2	1	34180228	C	6		0	1	C/-
1	DLGAP3	1	35365852	C	7		0	1	C/-
1	ZMYM6	1	35452790	T	7		1	0	-/T
1	ZMYM4	1	35825031	T	7		1	0	-/T
1	ZMYM4	1	35836080	A	7		1	0	-/A
1	COL8A2	1	36564614	C	6		0	1	C/-
1	MAP7D1	1	36636587	C	7		1	0	-/C
1	MAP7D1	1	36636626	C	7		0	1	CC/-
1	OXCT2	1	40236482	C	6		1	0	-/C
1	RLF	1	40704920	A	6		0	1	A/-
1	ZMPSTE24	1	40756543	T	9		0	1	T/-
1	HIVEP3	1	42049249	G	6		0	1	G/-
1	ZMYND12	1	42898873	T	6		0	1	T/-
1	CCDC30	1	43002166	A	7		0	1	A/-
1	SZT2	1	43888902	C	6		0	1	C/-
1	SZT2	1	43914072	G	6		0	1	G/-
1	DMAP1	1	44680022	A	6		0	1	A/-
1	BEST4	1	45250411	G	6		1	0	-/G
1	PTCH2	1	45288194	G	7		1	0	-/G
1	GPBP1L1	1	46120890	A	7		1	0	-/A
1	ATPAF1-AS1	1	47138994	C	7		1	0	-/C
1	BEND5	1	49201967	T	9		1	0	-/T
1	NRD1	1	52290962	A	7		0	1	A/-
1	CC2D1B	1	52819290	C	6		0	1	C/-
1	CDCP2	1	54605319	G	8		1	0	-/GG
1	USP24	1	55619562	T	7		0	1	T/-
1	USP1	1	62910505	A	7		0	1	A/-
1	ALG6	1	63876950	T	7		0	1	T/-
1	JAK1	1	65330630	T	7	x	0	1	T/-
1	JAK1	1	65339111	T	8	x	1	0	-/T
1	WDR78	1	67390426	T	7		0	1	T/-
1	LRRIQ3	1	74507481	A	7		0	1	A/-
1	FAM73A	1	78326950	T	6		0	1	T/-
1	ELTD1	1	79470896	A	6		1	0	-/A
1	ZNF326	1	90478763	A	7		1	0	-/A
1	ZNF644	1	91403063	T	6		0	1	T/-
1	ZNF644	1	91406040	T	9		0	1	T/-
1	EPHX4	1	92528831	A	7		0	1	A/-
1	KIAA1107	1	92642631	A	6		0	1	A/-
1	RPAP2	1	92772781	T	6		1	0	-/T
1	MTF2	1	93599280	A	8		0	1	A/-
1	ABCA4	1	94495003	G	7		1	0	-/G
1	SLC44A3	1	95357932	T	7		0	1	T/-
1	TMEM56,TMEM56-RWDD3	1	95616925	T	6		1	0	-/T
1	PTBP2	1	97243436	A	6		1	0	-/A
1	CDC14A	1	100889837	C	7		0	1	C/-
1	PRMT6	1	107599370	G	6		0	1	G/-
1	SLC25A24	1	108700183	T	8		0	1	T/-
1	PRPF38B	1	109242456	A	7		1	0	-/A
1	FNDC7	1	109276138	A	8		1	0	-/A
1	WDR47	1	109560141	T	7		1	0	-/T
1	SLC6A17	1	110714812	G	6		0	1	G/-
1	SLC16A4	1	110906427	A	9		0	1	A/-
1	DDX20	1	112308462	A	6		0	1	A/-
1	AP4B1	1	114442682	A	7		1	0	-/A
1	SYCP1	1	115537601	A	10		0	1	A/-
1	VANGL1	1	116206586	T	7		0	1	T/-
1	SLC22A15	1	116562317	A	6		1	0	-/A
1	CD58	1	117078662	T	6		1	0	-/T
1	CD58	1	117087123	T	6		0	1	T/-
1	PIAS3	1	145584023	C	6		1	0	-/C
1	PIAS3	1	145585533	G	7		1	0	-/G
1	BCL9	1	147092681	C	7	x	1	0	-/C
1	BCL9	1	147095957	G	6	x	1	0	-/G
1	SV2A	1	149884981	C	6		0	1	C/-
1	SF3B4	1	149895562	G	7		0	1	G/-
1	MTMR11	1	149908498	G	6		1	0	-/G
1	RPRD2	1	150445612	C	7		1	0	-/C
1	SETDB1	1	150921733	C	6		0	1	C/-
1	ZNF687	1	151261079	C	7		1	0	-/C
1	ZNF687	1	151262328	C	7		0	1	C/-
1	ZNF687	1	151262391	G	6		0	1	G/-
1	RFX5	1	151318741	G	7		0	1	G/-
1	FLG	1	152287870	T	7		1	0	-/T
1	NPR1	1	153659175	C	7		1	0	-/C
1	DENND4B	1	153916829	G	7		0	1	G/-
1	UBE2Q1	1	154530929	C	8		0	1	C/-
1	PBXIP1	1	154919204	C	6		1	0	-/C
1	PYGO2	1	154932071	G	6		0	1	G/-
1	SHC1	1	154938900	G	6		0	1	G/-
1	ADAM15	1	155033916	C	7		1	0	-/C
1	TRIM46	1	155152179	C	7		0	1	C/-
1	GBA	1	155209781	G	6		0	1	G/-
1	ASH1L	1	155327141	G	6		0	1	G/-
1	BCAN	1	156626160	G	7		0	1	G/-
1	PRCC	1	156737804	C	6	x	0	1	C/-
1	PRCC	1	156761536	C	8	x	1	0	-/CC
1	PEAR1	1	156884483	C	6		0	1	C/-
1	FCRL3	1	157666960	T	7		1	0	-/A
1	IGSF8	1	160063925	G	7		0	1	G/-
1	ATP1A4	1	160124898	C	6		0	1	C/-
1	COPA	1	160295427	T	8		0	1	T/-
1	ATF6	1	161789455	A	6		1	0	-/A
1	GPR161	1	168054869	C	6		0	1	C/-
1	METTL18	1	169762038	A	7		1	0	-/A
1	PRRX1	1	170688888	A	7		0	1	A/-
1	ANKRD45	1	173594033	T	6		1	0	-/T
1	RASAL2	1	178412041	A	8		1	0	-/A
1	NPHS2	1	179528881	A	8		1	0	-/A
1	CEP350	1	180023063	A	7		0	1	A/-
1	KIAA1614	1	180885383	C	6		0	1	C/-
1	SHCBP1L	1	182908681	A	7		1	0	-/A
1	LAMC1	1	183093966	T	6		0	1	T/-
1	LAMC2	1	183189988	G	6		0	1	G/-
1	ARPC5	1	183602245	G	6		0	1	G/-
1	TPR	1	186319444	T	6	x	0	1	T/-
1	GLRX2	1	193065778	T	8		0	1	T/-
1	B3GALT2	1	193149735	A	6		1	0	-/A
1	ASPM	1	197070524	T	7		0	1	T/-
1	KIF14	1	200534700	A	7		0	1	A/-
1	CAMSAP2	1	200822549	A	8		1	0	-/A
1	IGFN1	1	201175343	G	7		1	0	-/G
1	RNPEP	1	201973490	A	6		0	1	A/-
1	KDM5B	1	202704625	T	7		0	1	T/-
1	KLHL12	1	202862508	C	6		0	1	C/-
1	ZC3H11A	1	203816590	A	7		1	0	-/A
1	NUCKS1	1	205687466	G	6		1	0	-/G
1	PM20D1	1	205809435	G	6		1	0	-/G
1	SLC26A9	1	205884287	C	6		0	1	C/-
1	PPP2R5A	1	212534111	A	9		1	0	-/A
1	PROX1	1	214169999	T	6		1	0	-/T
1	PTPN14	1	214557491	G	6		0	1	G/-
1	GPATCH2	1	217793264	T	7		0	1	T/-
1	TGFB2	1	218520232	C	6		0	1	C/-
1	EPRS	1	220157578	T	7		1	0	-/T
1	ACBD3	1	226352491	T	9		0	1	T/-
1	GJC2	1	228346368	C	6		1	0	-/C
1	RAB4A	1	229422305	A	8		0	1	A/-
1	GALNT2	1	230379073	G	6		0	1	G/-
1	KIAA1383	1	232940984	A	6		1	0	-/A
1	KIAA1383	1	232942211	A	7		1	0	-/A
1	ARID4B	1	235345419	T	7		0	1	T/-
1	MTR	1	237024474	A	8		1	0	-/A
1	RYR2	1	237774124	C	6		1	0	-/C
1	RYR2	1	237969494	T	9		0	1	T/-
1	RYR2	1	237994815	T	6		1	0	-/T
1	CHRM3	1	240072444	A	8		0	1	A/-
1	RGS7	1	241262025	T	7		0	1	T/-
1	KMO	1	241753558	A	7		0	1	A/-
1	EXO1	1	242042052	T	7		0	1	T/-
1	CEP170	1	243349348	C	6		0	1	C/-
1	CNST	1	246784734	T	6		1	0	-/T
1	ZNF124	1	247319873	T	7		1	0	-/T
1	TPO	2	1507748	C	7		1	0	-/C
1	PXDN	2	1652984	G	7		1	0	-/G
1	TAF1B	2	10059231	A	7		1	0	-/A
1	RAD51AP2	2	17697199	T	8		0	1	T/-
1	RAD51AP2	2	17697688	T	6		0	1	T/-
1	RAD51AP2	2	17698737	T	7		0	1	T/-
1	RAD51AP2	2	17699326	G	6		1	0	-/G
1	SMC6	2	17898356	T	7		0	1	T/-
1	MATN3	2	20200211	T	7		0	1	T/-
1	HS1BP3	2	20840864	G	6		0	1	G/-
1	GDF7	2	20870507	C	8		0	1	C/-
1	SLC30A3	2	27479380	G	6		0	1	G/-
1	FNDC4	2	27717517	G	8		1	0	-/G
1	SPDYA	2	29063182	A	7		0	1	A/-
1	CAPN13	2	30966412	A	7		0	1	A/-
1	XDH	2	31571173	C	6		1	0	-/C
1	CRIM1	2	36764628	C	6		0	1	C/-
1	HEATR5B	2	37208635	A	8		1	0	-/A
1	CEBPZ	2	37428927	T	6		0	1	TTT/-
1	DHX57	2	39074185	A	8		1	0	-/A
1	ZFP36L2	2	43451602	G	6		0	1	G/-
1	ZFP36L2	2	43452260	C	6		0	1	C/-
1	LOC728819	2	43902621	G	6		1	0	-/G
1	SIX3	2	45169458	C	7		0	1	C/-
1	CRIPT	2	46846809	A	7		0	1	A/-
1	CRIPT	2	46851321	A	6		0	1	A/-
1	FSHR	2	49195930	T	6		1	0	-/T
1	NRXN1	2	50765683	C	7		1	0	-/C
1	EML6	2	55176077	A	8		1	0	-/A
1	EML6	2	55191257	A	6		0	1	A/-
1	BCL11A	2	60688969	G	7	x	0	1	G/-
1	BCL11A	2	60689254	G	7	x	0	1	G/-
1	PEX13	2	61244916	C	6		0	1	C/-
1	USP34	2	61633020	T	8		0	1	T/-
1	EHBP1	2	62991424	A	6		0	1	A/-
1	C2orf42	2	70377539	G	6		0	1	G/-
1	C2orf42	2	70392682	T	7		1	0	-/T
1	ZNF638	2	71653907	A	6		1	0	-/A
1	DYSF	2	71797751	C	6		1	0	-/C
1	DYSF	2	71839797	C	7		0	1	C/-
1	TET3	2	74274090	A	7		0	1	A/-
1	TET3	2	74329152	G	7		1	0	-/G
1	SLC4A5	2	74451994	T	7		0	1	T/-
1	WBP1	2	74687410	C	8		1	0	-/C
1	MOGS	2	74690035	G	7		0	1	G/-
1	HTRA2	2	74757473	G	7		0	1	G/-
1	DNAH6	2	84752851	A	7		1	0	-/A
1	KCMF1	2	85280408	G	6		1	0	-/G
1	TCF7L1	2	85532498	C	6		0	1	C/-
1	ST3GAL5	2	86071632	T	6		1	0	-/T
1	RNF103	2	86849990	A	7		0	1	A/-
1	SNRNP200	2	96958782	T	6		0	1	T/-
1	FAM178B	2	97637864	G	6		0	1	G/-
1	FAHD2B	2	97749725	G	7		0	1	G/-
1	ANKRD36B	2	98129803	T	7		1	0	-/T
1	C2orf55	2	99438396	G	6		0	1	G/-
1	EIF5B	2	99976805	A	8		0	1	A/-
1	EIF5B	2	99977965	A	8		0	1	A/-
1	REV1	2	100040712	A	6		0	1	A/-
1	REV1	2	100055102	T	8		0	1	T/-
1	AFF3	2	100217914	G	7		1	0	-/G
1	SLC9A4	2	103149137	A	8		1	0	-/A
1	TMEM182	2	103431362	T	7		1	0	-/T
1	IWS1	2	128253680	T	6		1	0	-/T
1	SAP130	2	128750850	A	6		1	0	-/A
1	FAM123C	2	131521308	G	7		1	0	-/G
1	POTEE	2	132021205	C	6		1	0	-/C
1	TUBA3D	2	132238225	G	6		0	1	G/-
1	TUBA3D	2	132240143	C	6		0	1	C/-
1	NXPH2	2	139428767	G	6		0	1	G/-
1	LRP1B	2	141243038	T	6		1	0	-/T
1	KYNU	2	143798030	A	6		1	0	-/A
1	KIF5C	2	149803485	A	8		1	0	-/A
1	RIF1	2	152321320	A	6		0	1	A/-
1	NEB	2	152550922	T	7		0	1	T/-
1	PRPF40A	2	153529111	T	7		0	1	T/-
1	NR4A2	2	157182418	C	6		0	1	C/-
1	NR4A2	2	157185029	T	7		0	1	T/-
1	DAPL1	2	159660820	A	6		1	0	-/A
1	KCNH7	2	163253449	T	6		0	1	T/-
1	SCN3A	2	165950947	T	6		1	0	-/T
1	SCN2A	2	166168545	T	6		0	1	T/-
1	SCN1A	2	166905432	A	6		0	1	A/-
1	SCN7A	2	167333974	T	8		1	0	-/T
1	XIRP2	2	168104864	A	7		1	0	-/A
1	NOSTRIN	2	169699563	A	7		1	0	-/A
1	LRP2	2	170127462	A	7		0	1	A/-
1	PPIG	2	170493972	A	7		1	0	-/A
1	SSB	2	170665008	A	8		0	1	A/-
1	GORASP2	2	171822527	C	6		1	0	-/C
1	DCAF17	2	172330378	A	6		1	0	-/A
1	CIR1	2	175213713	T	9		1	0	-/T
1	HOXD8	2	176995417	C	7		0	1	C/-
1	DFNB59	2	179325760	T	6		1	0	-/T
1	TTN	2	179424783	T	6		1	0	-/T
1	TTN	2	179535860	T	7		0	1	T/-
1	TTN	2	179537381	T	6		1	0	-/T
1	NEUROD1	2	182542972	G	7		1	0	-/G
1	DNAJC10	2	183622515	T	6		0	1	T/-
1	NUP35	2	184025805	A	7		0	1	A/-
1	ITGAV	2	187521085	G	7		0	1	G/-
1	TFPI	2	188361620	T	7		1	0	-/T
1	OSGEPL1	2	190620089	T	6		0	1	T/-
1	PMS1	2	190682810	A	7	x	0	1	A/-
1	PMS1	2	190719198	A	6	x	1	0	-/A
1	MFSD6	2	191301839	C	6		1	0	-/C
1	STAT1	2	191844524	T	6		0	1	T/-
1	DNAH7	2	196788374	T	9		0	1	T/-
1	DNAH7	2	196801374	A	8		1	0	-/A
1	ALS2CR8	2	203848308	A	8		1	0	-/A
1	RAPH1	2	204305619	G	8		0	1	G/-
1	INO80D	2	206882406	T	7		0	1	T/-
1	GPR1	2	207041592	A	7		0	1	A/-
1	ZDBF2	2	207174428	A	9		0	1	A/-
1	MAP2	2	210561667	A	7		0	1	A/-
1	KANSL1L	2	210887680	T	8		0	1	T/-
1	AAMP	2	219134766	G	7		1	0	-/G
1	SPEG	2	220313717	C	6		1	0	-/C
1	ASIC4	2	220402688	G	7		1	0	-/G
1	OBSL1	2	220416490	G	6		0	1	G/-
1	EPHA4	2	222429083	T	7		0	1	T/-
1	DOCK10	2	225729790	A	7		1	0	-/A
1	IRS1	2	227661664	C	8		1	0	-/C
1	TRIP12	2	230724211	T	6		1	0	-/T
1	TRIP12	2	230744763	C	6		0	1	C/-
1	SP100	2	231379990	A	8		1	0	-/A
1	SP100	2	231380250	A	6		1	0	-/A
1	PSMD1	2	231931680	A	8		0	1	A/-
1	DIS3L2	2	233194613	C	6		0	1	C/-
1	UGT1A10	2	234545526	T	7		0	1	T/-
1	HDAC4	2	240002823	G	7		0	1	G/-
1	HDAC4	2	240066299	T	6		0	1	T/-
1	HDLBP	2	242179467	C	6		0	1	C/-
1	CXXC11	2	242814375	C	7		0	1	C/-
1	CNTN6	3	1367608	A	6		1	0	-/A
1	CNTN6	3	1371501	A	8		0	1	A/-
1	TRNT1	3	3189779	A	7		0	1	A/-
1	THUMPD3	3	9412927	A	6		0	1	A/-
1	PPARG	3	12458270	C	6	x	0	1	C/-
1	SATB1	3	18391077	G	6		0	1	G/-
1	KCNH8	3	19322812	A	6		1	0	-/A
1	SGOL1	3	20212216	T	7		1	0	-/T
1	TOP2B	3	25646314	A	6		0	1	A/-
1	CLASP2	3	33602361	T	8		0	1	T/-
1	PDCD6IP	3	33866811	T	8		1	0	-/T
1	TRANK1	3	36897427	A	6		1	0	-/A
1	TRANK1	3	36934449	T	7		0	1	T/-
1	ULK4	3	41860985	T	10		1	0	-/T
1	NKTR	3	42679486	A	8		0	1	A/-
1	C3orf77	3	44286737	A	7		0	1	A/-
1	SETD2	3	47084146	G	6	x	0	1	G/-
1	SETD2	3	47161907	T	7	x	0	1	T/-
1	SETD2	3	47165213	T	7	x	0	1	T/-
1	KIF9	3	47316957	T	7		0	1	T/-
1	PTPN23	3	47451508	C	6		0	1	C/-
1	PTPN23	3	47453056	C	6		1	0	-/C
1	PLXNB1	3	48455370	G	6		1	0	-/G
1	COL7A1	3	48631052	C	6		1	0	-/C
1	CELSR3	3	48689431	G	6		0	1	G/-
1	QARS	3	49139285	C	6		0	1	C/-
1	BSN	3	49697975	C	6		0	1	C/-
1	RBM6	3	50099450	A	8		0	1	A/-
1	RBM6	3	50099518	A	6		1	0	-/A
1	IFRD2	3	50327898	C	7		0	1	C/-
1	TMEM115	3	50396212	C	6		0	1	C/-
1	VPRBP	3	51457615	G	7		1	0	-/G
1	STAB1	3	52546401	C	6		1	0	-/C
1	STAB1	3	52547908	C	7		0	1	C/-
1	MUSTN1,TMEM110-MUSTN1	3	52867725	G	6		1	0	-/G
1	SFMBT1	3	52941212	T	7		1	0	-/T
1	CACNA2D3	3	54596940	T	6		0	1	T/-
1	CCDC66	3	56601053	A	7		1	0	-/A
1	APPL1	3	57276921	A	8		0	1	A/-
1	PTPRG	3	62204528	A	7		0	1	A/-
1	UBA3	3	69105170	T	6		0	1	T/-
1	CNTN3	3	74548856	T	7		1	0	-/T
1	ROBO2	3	77657038	C	8		1	0	-/C
1	ARL13B	3	93755447	A	6		0	1	A/-
1	MINA	3	97686274	A	6		0	1	A/-
1	MINA	3	97686351	C	6		0	1	C/-
1	OR5H1	3	97852456	A	7		1	0	-/A
1	OR5H15	3	97887844	T	7		0	1	T/-
1	OR5K4	3	98073592	A	7		0	1	A/-
1	FILIP1L	3	99568273	T	8		0	1	T/-
1	MYH15	3	108229398	A	7		0	1	A/-
1	DZIP3	3	108324275	T	6		1	0	-/T
1	DZIP3	3	108363319	A	6		0	1	A/-
1	PHLDB2	3	111664163	G	6		0	1	G/-
1	SLC9A10	3	111923223	A	7		0	1	A/-
1	SLC9A10	3	112005610	A	8		1	0	-/A
1	CCDC80	3	112357095	T	8		1	0	-/T
1	CCDC80	3	112357154	T	6		0	1	T/-
1	KIAA2018	3	113380090	T	9		0	1	T/-
1	GOLGB1	3	121416517	T	7		1	0	-/T
1	EAF2	3	121573659	A	8		1	0	-/A
1	PARP15	3	122345823	A	7		0	1	A/-
1	PARP14	3	122399784	C	6		1	0	-/C
1	PARP14	3	122433232	A	10		0	1	A/-
1	DIRC2	3	122591420	T	6		0	1	T/-
1	SEMA5B	3	122645392	C	6		0	1	C/-
1	PDIA5	3	122869089	C	7		1	0	-/C
1	MUC13	3	124646677	G	6		1	0	-/G
1	ALDH1L1	3	125855666	C	7		0	1	C/-
1	UROC1	3	126220106	T	8		0	1	T/-
1	ABTB1	3	127396115	C	6		0	1	C/-
1	MBD4	3	129152815	G	6		1	0	-/G
1	IFT122	3	129183577	G	6		0	1	G/-
1	COL6A5	3	130110080	A	7		0	1	A/-
1	COL6A5	3	130114005	A	6		0	1	A/-
1	COL6A5	3	130135658	A	6		0	1	A/-
1	COL6A6	3	130318621	C	7		0	1	C/-
1	NEK11	3	130887675	A	6		1	0	-/A
1	ACAD11	3	132322086	T	6		1	0	-/T
1	TMEM108	3	133099024	C	7		0	1	C/-
1	TOPBP1	3	133320122	T	7		1	0	-/T
1	SLCO2A1	3	133670083	A	8		0	1	A/-
1	GRK7	3	141535708	G	6		0	1	G/-
1	PLOD2	3	145828190	T	7		0	1	T/-
1	HPS3	3	148885692	A	6		0	1	A/-
1	CP	3	148939579	T	7		0	1	T/-
1	TM4SF4	3	149192694	G	7		0	1	G/-
1	GPR171	3	150917110	A	8		0	1	A/-
1	ARHGEF26	3	153840216	C	6		0	1	C/-
1	DHX36	3	154032860	T	8		0	1	T/-
1	DHX36	3	154042131	C	6		1	0	-/C
1	C3orf33	3	155481558	T	7		0	1	T/-
1	BCHE	3	165547795	T	7		0	1	T/-
1	BCHE	3	165548196	T	7		0	1	T/-
1	MECOM	3	168833257	T	7		0	1	T/-
1	PRKCI	3	169998128	A	8		1	0	-/A
1	FNDC3B	3	171965521	T	6		0	1	T/-
1	NCEH1	3	172351857	T	6		0	1	T/-
1	FXR1	3	180666565	T	6		1	0	-/T
1	HTR3C	3	183777417	C	6		0	1	C/-
1	EIF4G1	3	184039824	C	6		0	1	C/-
1	MB21D2	3	192517004	T	7		0	1	T/-
1	TMEM44	3	194325101	G	6		0	1	G/-
1	MUC4	3	195479984	G	6		1	0	-/G
1	TNK2	3	195594842	G	7		1	0	-/G
1	TNK2	3	195597006	G	7		0	1	G/-
1	TNK2	3	195597046	G	7		1	0	-/G
1	PIGZ	3	196674467	C	6		1	0	-/C
1	ZNF718	4	155648	A	6		1	0	-/A
1	HAUS3	4	2242634	T	8		0	1	T/-
1	FAM193A	4	2661593	C	7		0	1	C/-
1	SH3BP2	4	2831768	C	6		1	0	-/C
1	SH3BP2	4	2833305	C	6		0	1	C/-
1	STK32B	4	5053615	C	6		1	0	-/C
1	KIAA0232	4	6864456	A	7		1	0	-/A
1	CLNK	4	10599605	T	6		1	0	-/T
1	PROM1	4	15995680	T	8		0	1	T/-
1	LCORL	4	17886065	T	6		1	0	-/T
1	ANAPC4	4	25390191	A	6		0	1	A/-
1	TLR10	4	38774956	T	8		1	0	-/T
1	UGDH	4	39515753	A	9		0	1	A/-
1	N4BP2	4	40123528	A	7		0	1	A/-
1	KCTD8	4	44177044	T	6		0	1	T/-
1	GUF1	4	44700615	A	8		0	1	A/-
1	GABRG1	4	46060358	A	8		0	1	A/-
1	OCIAD1	4	48859372	A	7		0	1	A/-
1	EXOC1	4	56765965	A	8		0	1	A/-
1	AASDH	4	57248652	T	8		1	0	-/T
1	AASDH	4	57248685	T	6		0	1	T/-
1	REST	4	57796355	A	6		0	1	A/-
1	IGFBP7	4	57907077	G	6		1	0	-/G
1	TECRL	4	65188498	A	6		0	1	A/-
1	EPHA5	4	66286238	T	6		1	0	-/T
1	CENPC1	4	68355805	A	6		0	1	A/-
1	CSN2	4	70823289	A	6		0	1	A/-
1	AFM	4	74351595	A	6		1	0	-/A
1	C4orf26	4	76489680	A	8		0	1	A/-
1	SDAD1	4	76891521	T	7		1	0	-/T
1	CXCL9	4	76924806	T	7		0	1	T/-
1	CCNI	4	77977433	A	6		0	1	A/-
1	CCNG2	4	78080586	T	6		1	0	-/T
1	FRAS1	4	79238583	C	7		1	0	-/C
1	C4orf22	4	81791254	A	8		0	1	A/-
1	THAP9	4	83827514	A	6		0	1	A/-
1	THAP9	4	83838382	T	7		0	1	T/-
1	CDS1	4	85556475	T	9		0	1	T/-
1	HERC6	4	89349778	A	7		0	1	A/-
1	HERC5	4	89383467	A	6		0	1	A/-
1	HERC5	4	89415343	T	6		0	1	T/-
1	ATOH1	4	94750382	G	6		0	1	G/-
1	BMPR1B	4	96025646	C	6		1	0	-/C
1	EMCN	4	101344213	T	6		1	0	-/T
1	BANK1	4	102951317	A	7		0	1	A/-
1	TBCK	4	107156505	T	8		0	1	T/-
1	ANK2	4	114274959	A	6		0	1	A/-
1	NDST3	4	119161837	C	6		0	1	C/-
1	KIAA1109	4	123165029	A	8		1	0	-/A
1	ANKRD50	4	125590577	T	6		1	0	-/T
1	INTU	4	128608872	T	7		0	1	T/-
1	INTU	4	128627850	A	6		1	0	-/A
1	LARP1B	4	129127627	A	8		0	1	A/-
1	SCLT1	4	129864163	T	8		0	1	T/-
1	PCDH10	4	134071968	C	7		1	0	-/C
1	MGST2	4	140624683	A	6		0	1	A/-
1	IL15	4	142643138	A	7		1	0	-/A
1	INPP4B	4	143007332	T	7		1	0	-/T
1	HHIP	4	145567956	C	6		0	1	C/-
1	ABCE1	4	146041093	T	7		0	1	T/-
1	FBXW7	4	153244156	C	6	x	0	1	C/-
1	RAPGEF2	4	160253755	A	7		0	1	A/-
1	FSTL5	4	162841599	T	6		1	0	-/T
1	TKTL2	4	164393696	A	6		0	1	A/-
1	TMA16	4	164435265	A	7		0	1	A/-
1	2001-03-01	4	164449919	G	6		0	1	G/-
1	TLL1	4	167022020	A	6		0	1	A/-
1	DDX60	4	169182016	A	8		0	1	A/-
1	DDX60	4	169229302	A	8		0	1	A/-
1	NEK1	4	170428880	T	7		1	0	-/TT
1	CLCN3	4	170613460	A	7		1	0	-/A
1	HAND2	4	174450194	C	7		1	0	-/C
1	ADAM29	4	175898771	A	7		0	1	A/-
1	WWC2	4	184166576	A	7		0	1	A/-
1	CCDC110	4	186379967	T	7		1	0	-/T
1	CYP4V2	4	187118245	T	7		0	1	T/-
1	KLKB1	4	187158019	A	6		0	1	A/-
1	FAT1	4	187630605	T	7		0	1	T/-
1	SLC12A7	5	1085356	G	6		1	0	-/G
1	C5orf38	5	2752756	G	6		0	1	G/-
1	KIAA0947	5	5441266	A	6		0	1	A/-
1	KIAA0947	5	5463182	A	6		0	1	A/-
1	MED10	5	6372636	C	6		0	1	C/-
1	FASTKD3	5	7867769	T	7		0	1	T/-
1	MYO10	5	16694614	T	6		1	0	-/C
1	PDZD2	5	32089076	A	7		0	1	A/-
1	C1QTNF3	5	34035781	G	6		0	1	G/-
1	RAI14	5	34814751	T	6		0	1	T/-
1	SPEF2	5	35654721	A	7		0	1	A/-
1	C5orf42	5	37167306	T	7		0	1	T/-
1	C5orf42	5	37226878	A	8		0	1	A/-
1	LIFR	5	38499634	T	6	x	1	0	-/T
1	DAB2	5	39394337	T	7		0	1	T/-
1	HEATR7B2	5	41000852	A	8		0	1	A/-
1	SKIV2L2	5	54696236	A	8		1	0	-/A
1	MAP3K1	5	56178258	A	6		1	0	-/A
1	IPO11	5	61847115	T	8		0	1	T/-
1	RNF180	5	63510046	C	6		0	1	C/-
1	MCCC2	5	70939716	A	6		0	1	A/-
1	MAP1B	5	71490420	A	6		0	1	A/-
1	RGNEF	5	73069762	G	6		0	1	G/-
1	RFESD	5	94989844	A	6		0	1	A/-
1	PAM	5	102309949	A	7		1	0	-/A
1	FBXL17	5	107716445	G	6		1	0	-/A
1	FER	5	108290522	A	7		1	0	-/A
1	APC	5	112175952	A	6	x	1	0	-/A
1	DMXL1	5	118465026	T	7		0	1	T/-
1	DMXL1	5	118502316	A	7		0	1	A/-
1	CSNK1G3	5	122881495	A	8		0	1	A/-
1	PHAX	5	125939712	A	7		1	0	-/A
1	FSTL4	5	132534947	C	7		1	0	-/C
1	VDAC1	5	133316639	T	8		1	0	-/T
1	TCF7	5	133451680	C	6		0	1	C/-
1	TCF7	5	133473765	C	7		1	0	-/C
1	FAM13B	5	137278834	A	7		1	0	-/A
1	FAM53C	5	137682474	C	6		0	1	C/-
1	REEP2	5	137781267	A	6		1	0	-/A
1	EGR1	5	137802523	C	6		1	0	-/C
1	EGR1	5	137803132	C	7		1	0	-/C
1	MATR3	5	138643643	A	6		1	0	-/A
1	C5orf65	5	138728749	G	6		1	0	-/G
1	PSD2	5	139193288	G	7		0	1	G/-
1	EIF4EBP3	5	139927394	G	6		1	0	-/G
1	ZMAT2	5	140080406	A	6		1	0	-/A
1	PCDHA9	5	140230509	T	8		0	1	T/-
1	PCDHA9	5	140230590	T	8		0	1	T/-
1	PCDHB9	5	140567420	T	6		0	1	T/-
1	PCDHB13	5	140594607	A	7		1	0	-/A
1	DIAPH1	5	140953309	G	8		1	0	-/G
1	DIAPH1	5	140953387	G	6		0	1	G/-
1	PCDH12	5	141336748	G	7		0	1	G/-
1	YIPF5	5	143543785	T	6		1	0	-/T
1	KCTD16	5	143853531	A	9		0	1	A/-
1	TCERG1	5	145872567	A	7		1	0	-/A
1	TCERG1	5	145887465	A	8		1	0	-/A
1	STK32A	5	146754725	A	8		0	1	A/-
1	FBXO38	5	147806940	A	8		1	0	-/A
1	FAT2	5	150886794	G	6		0	1	G/-
1	LARP1	5	154173390	C	8		0	1	C/-
1	GEMIN5	5	154287370	T	7		0	1	T/-
1	FNDC9	5	156769910	C	7		0	1	C/-
1	GABRA6	5	161115971	T	7		0	1	T/-
1	RANBP17	5	170610222	A	6	x	0	1	A/-
1	STK10	5	171517345	T	7		1	0	-/T
1	BNIP1	5	172578611	T	9		1	0	-/T
1	CDHR2	5	176011640	G	6		0	1	G/-
1	NSD1	5	176675269	A	7	x	0	1	A/-
1	CANX	5	179149920	T	8		0	1	TT/-
1	MGAT4B	5	179227545	G	6		0	1	G/-
1	C5orf45	5	179280430	T	6		0	1	T/-
1	C6orf201	6	4122194	A	7		0	1	A/-
1	F13A1	6	6225023	G	6		0	1	G/-
1	RIOK1	6	7417630	A	7		0	1	A/-
1	GCNT2	6	10557410	C	7		0	1	C/-
1	MAK	6	10764770	T	6		1	0	-/T
1	C6orf228	6	11134657	T	7		0	1	T/-
1	HIVEP1	6	12089463	A	7		1	0	-/A
1	HIVEP1	6	12120334	A	6		1	0	-/A
1	PHACTR1	6	13206135	G	7		0	1	G/-
1	GFOD1	6	13470806	T	9		0	1	T/-
1	NOL7	6	13620992	A	8		0	1	A/-
1	JARID2	6	15513220	A	7		0	1	A/-
1	ATXN1	6	16327823	G	7		0	1	G/-
1	DEK	6	18258250	A	7	x	0	1	A/-
1	NKAPL	6	28227708	A	7		0	1	A/-
1	PGBD1	6	28268660	A	7		0	1	A/-
1	MOG	6	29627217	C	7		1	0	-/C
1	PPP1R10	6	30569334	G	7		0	1	G/-
1	PPP1R18	6	30652400	G	6		0	1	G/-
1	MUC21	6	30955877	C	6		0	1	C/-
1	PSORS1C1	6	31106501	C	7		0	1	C/-
1	TCF19	6	31127312	C	7		0	1	C/-
1	HLA-B	6	31323363	G	6		0	1	G/-
1	PRRC2A	6	31604627	C	6		0	1	C/-
1	NEU1	6	31827582	G	6		0	1	G/-
1	RDBP	6	31926206	G	6		0	1	G/-
1	SKIV2L	6	31934881	G	6		0	1	G/-
1	TNXB	6	32049424	G	7		1	0	-/G
1	PRRT1	6	32118218	C	6		0	1	C/-
1	HLA-DPB1	6	33043844	C	6		1	0	-/C
1	COL11A2	6	33152075	G	7		1	0	-/G
1	COL11A2	6	33153520	G	6		0	1	G/-
1	TAPBP	6	33273073	G	6		0	1	G/-
1	PHF1	6	33380050	C	7		0	1	C/-
1	SCUBE3	6	35213108	C	6		0	1	C/-
1	ZNF76	6	35260781	C	6		0	1	C/-
1	SLC26A8	6	35912065	T	7		0	1	T/-
1	ETV7	6	36341235	G	6		0	1	G/-
1	DNAH8	6	38816440	A	8		0	1	A/-
1	FRS3	6	41738957	C	6		1	0	-/C
1	KIAA0240	6	42832627	A	7		0	1	A/-
1	TTBK1	6	43227330	C	7		0	1	C/-
1	XPO5	6	43491677	T	7		1	0	-/T
1	RUNX2	6	45390355	C	7		1	0	-/C
1	TDRD6	6	46660415	A	9		1	0	-/A
1	DEFB113	6	49936566	T	7		1	0	-/T
1	TFAP2D	6	50712938	A	6		1	0	-/A
1	EFHC1	6	52334208	A	7		0	1	A/-
1	DST	6	56336022	T	6		0	1	T/-
1	DST	6	56362695	T	6		1	0	-/T
1	DST	6	56434717	T	7		0	1	T/-
1	DST	6	56476324	A	7		0	1	A/-
1	DST	6	56485020	T	7		0	1	T/-
1	DST	6	56495152	T	6		0	1	T/-
1	KIAA1586	6	56917909	A	8		0	1	A/-
1	PHF3	6	64415953	A	7		0	1	A/-
1	BAI3	6	70098782	A	7		0	1	A/-
1	OGFRL1	6	72006381	A	7		1	0	-/A
1	COL12A1	6	75798824	G	6		0	1	G/-
1	SENP6	6	76386858	T	7		0	1	T/-
1	ZNF292	6	87965252	A	6		0	1	A/-
1	RARS2	6	88229955	T	7		0	1	T/-
1	MDN1	6	90432675	T	8		0	1	T/-
1	BACH2	6	90718349	T	6		1	0	-/T
1	MAP3K7	6	91226271	T	6		1	0	-/T
1	USP45	6	99916420	T	7		1	0	-/T
1	MCHR2	6	100395834	T	7		0	1	T/-
1	SIM1	6	100838735	T	6		0	1	T/-
1	BEND3	6	107391602	C	7		0	1	C/-
1	SOBP	6	107956305	C	6		0	1	C/-
1	MICAL1	6	109775268	C	6		0	1	C/-
1	REV3L	6	111689017	T	7		1	0	-/T
1	REV3L	6	111693904	G	7		1	0	-/G
1	TRAF3IP2	6	111880693	T	8		0	1	T/-
1	ZUFSP	6	116967058	T	8		0	1	T/-
1	TRDN	6	123759209	T	8		0	1	T/-
1	SOGA3	6	127794435	A	6		1	0	-/A
1	PTPRK	6	128326374	T	6		1	0	-/T
1	AKAP7	6	131540807	A	7		0	1	A/-
1	CTAGE9	6	132031982	A	7		0	1	A/-
1	HBS1L	6	135357714	T	8		1	0	-/T
1	MYB	6	135518338	A	7	x	0	1	A/-
1	AHI1	6	135784284	T	8		1	0	-/T
1	BCLAF1	6	136599252	T	6		0	1	T/-
1	HEBP2	6	138734184	A	7		0	1	A/-
1	PEX3	6	143784126	A	6		1	0	-/A
1	PHACTR2	6	144081696	A	8		1	0	-/A
1	PHACTR2	6	144086746	C	7		1	0	-/C
1	SHPRH	6	146266724	T	7		0	1	T/-
1	GRM1	6	146350672	T	8		1	0	-/T
1	SYNE1	6	152527321	T	6		0	1	T/-
1	SYNE1	6	152651609	T	6		1	0	-/T
1	SYNE1	6	152763303	C	6		0	1	C/-
1	MYCT1	6	153019117	T	7		0	1	T/-
1	ARID1B	6	157405954	G	6		1	0	-/G
1	TULP4	6	158900957	C	7		0	1	C/-
1	TULP4	6	158923160	C	6		0	1	C/-
1	EZR	6	159206452	G	6	x	1	0	-/G
1	ACAT2	6	160196216	A	6		1	0	-/A
1	PLG	6	161152918	A	7		0	1	A/-
1	PLG	6	161157984	G	6		1	0	-/G
1	AGPAT4	6	161560589	G	7		0	1	G/-
1	T	6	166576104	C	6		0	1	C/-
1	FAM20C	7	208908	G	6		0	1	G/-
1	SDK1	7	4185504	G	6		0	1	G/-
1	PMS2	7	6027157	T	8	x	1	0	-/T
1	ZDHHC4	7	6621849	T	8		1	0	-/T
1	PHF14	7	11022426	A	7		0	1	A/-
1	AGR3	7	16913405	T	6		0	1	T/-
1	KLHL7	7	23163476	T	7		0	1	T/-
1	NUPL2	7	23224773	G	7		0	1	G/-
1	DFNA5	7	24784271	C	6		0	1	C/-
1	SNX10	7	26411618	A	7		0	1	A/-
1	EEPD1	7	36194639	G	6		1	0	-/G
1	ANLN	7	36460304	A	7		1	0	-/A
1	VPS41	7	38810820	T	7		1	0	-/T
1	POU6F2	7	39247047	C	6		0	1	C/-
1	CDK13	7	39990717	G	8		0	1	G/-
1	MPLKIP	7	40173940	C	6		1	0	-/C
1	AEBP1	7	44152317	G	6		0	1	G/-
1	C7orf57	7	48086205	A	8		0	1	A/-
1	ABCA13	7	48288826	A	6		0	1	A/-
1	DDC	7	50531075	T	7		1	0	-/T
1	ZNF716	7	57528542	A	7		1	0	-/A
1	ZNF735	7	63679804	A	7		0	1	A/-
1	MLXIPL	7	73021958	G	6		0	1	G/-
1	CLDN4	7	73245831	G	6		0	1	G/-
1	DMTF1	7	86817444	A	7		0	1	A/-
1	ABCB4	7	87101972	T	7		1	0	-/T
1	RUNDC3B	7	87258157	G	6		0	1	G/-
1	STEAP2	7	89856465	T	8		1	0	-/T
1	C7orf63	7	89929188	A	8		0	1	A/-
1	MTERF	7	91502949	T	7		0	1	T/-
1	AKAP9	7	91603085	A	8	x	0	1	A/-
1	AKAP9	7	91708403	A	7	x	0	1	A/-
1	PEX1	7	92134190	T	6		0	1	T/-
1	FAM133B	7	92207485	T	6		0	1	T/-
1	SAMD9	7	92735258	T	7		0	1	T/-
1	COL1A2	7	94029582	C	6		0	1	C/-
1	CASD1	7	94180735	T	6		1	0	-/T
1	ASB4	7	95157266	C	6		0	1	C/-
1	ZKSCAN5	7	99128970	A	6		0	1	A/-
1	CYP3A7,CYP3A7-CYP3AP1	7	99328707	A	6		1	0	-/A
1	GPC2	7	99767927	C	7		0	1	C/-
1	PVRIG	7	99817848	G	7		0	1	G/-
1	NYAP1	7	100086600	G	6		0	1	G/-
1	AGFG2	7	100150976	C	6		0	1	C/-
1	GIGYF1	7	100285170	G	8		0	1	G/-
1	ZAN	7	100334234	G	6		0	1	G/-
1	NAT16	7	100817874	C	6		1	0	-/C
1	CUX1	7	101758493	A	6		1	0	-/A
1	CUX1	7	101839974	C	7		1	0	-/C
1	LRRC17	7	102584661	T	6		0	1	T/-
1	LRRC17	7	102584993	A	8		0	1	A/-
1	DNAJC2	7	102964992	T	8		1	0	-/T
1	MLL5	7	104746985	A	7		0	1	A/-
1	PUS7	7	105148864	T	7		0	1	T/-
1	CBLL1	7	107395909	A	7		0	1	A/-
1	IMMP2L	7	111127377	C	6		0	1	C/-
1	CTTNBP2	7	117424458	G	6		0	1	G/-
1	ANKRD7	7	117865053	A	6		0	1	A/-
1	C7orf58	7	120911388	A	7		1	0	-/A
1	WNT16	7	120971879	G	7		1	0	-/G
1	CADPS2	7	122194676	T	6		0	1	T/-
1	IQUB	7	123119856	A	6		1	0	-/A
1	GRM8	7	126544156	T	7		0	1	T/-
1	TNPO3	7	128610259	G	7		0	1	G/-
1	TSGA13	7	130357652	T	8		0	1	T/-
1	CHRM2	7	136700150	T	7		0	1	T/-
1	UBN2	7	138916333	C	7		0	1	C/-
1	KLRG2	7	139164494	G	6		0	1	G/-
1	JHDM1D	7	139790972	T	7		1	0	-/T
1	WEE2	7	141418933	A	6		0	1	A/-
1	TAS2R4	7	141478534	T	7		1	0	-/T
1	PRSS37	7	141536983	T	6		1	0	-/T
1	OR2A7	7	143956190	A	7		0	1	A/-
1	ARHGEF5	7	144062071	C	6		1	0	-/C
1	SSPO	7	149474083	G	7		0	1	G/-
1	REPIN1	7	150069001	C	6		1	0	-/C
1	REPIN1	7	150069439	C	8		0	1	C/-
1	GIMAP8	7	150164232	A	7		1	0	-/A
1	NOS3	7	150698398	G	7		1	0	-/G
1	ATG9B	7	150721484	C	8		1	0	-/C
1	AGAP3	7	150783997	C	7		1	0	-/C
1	PRKAG2	7	151372597	G	7		0	1	G/-
1	MLL3	7	151845524	A	6	x	1	0	-/A
1	PAXIP1	7	154782740	A	8		1	0	-/A
1	WDR60	7	158704353	A	8		0	1	A/-
1	RP1L1	8	10470757	G	6		0	1	G/-
1	FGL1	8	17726471	T	7		0	1	T/-
1	CSGALNACT1	8	19263296	T	7		0	1	T/-
1	SORBS3	8	22414411	C	6		1	0	-/C
1	EGR3	8	22548712	G	6		1	0	-/G
1	RHOBTB2	8	22864673	G	6		0	1	G/-
1	ADAM28	8	24188715	T	6		0	1	T/-
1	CDCA2	8	25364716	A	7		1	0	-/A
1	EPHX2	8	27364393	T	7		0	1	T/-
1	ESCO2	8	27634577	A	9		1	0	-/A
1	C8orf80	8	27888776	T	8		0	1	T/-
1	KIF13B	8	28929681	G	6		0	1	G/-
1	RAB11FIP1	8	37728933	T	8		0	1	T/-
1	RAB11FIP1	8	37730181	T	6		1	0	-/T
1	GOT1L1	8	37793281	G	7		1	0	-/G
1	BAG4	8	38067995	A	8		1	0	-/A
1	WHSC1L1	8	38187254	T	6	x	1	0	-/A
1	HGSNAT	8	43002099	A	7		0	1	A/-
1	RB1CC1	8	53569707	T	6		0	1	T/-
1	LYN	8	56863054	A	7		0	1	A/-
1	ASPH	8	62475367	T	6		0	1	T/-
1	MYBL1	8	67488453	T	8		0	1	T/-
1	C8orf44-SGK3,SGK3	8	67716612	A	7		0	1	A/-
1	C8orf44-SGK3,SGK3	8	67752239	T	7		0	1	T/-
1	ARFGEF1	8	68128856	G	7		0	1	G/-
1	PREX2	8	68992721	T	8		1	0	-/T
1	SULF1	8	70488249	G	7		0	1	G/-
1	SLCO5A1	8	70744246	G	6		0	1	G/-
1	ZFHX4	8	77617547	G	7		1	0	-/G
1	LRRCC1	8	86057678	A	7		0	1	A/-
1	FAM82B	8	87498738	T	7		1	0	-/T
1	SLC26A7	8	92406218	T	8		1	0	-/T
1	ESRP1	8	95686682	G	6		1	0	-/G
1	C8orf38	8	96057774	A	7		0	1	A/-
1	POP1	8	99168468	A	7		0	1	A/-
1	RGS22	8	100990178	T	9		0	1	T/-
1	FBXO43	8	101154105	T	7		0	1	T/-
1	PKHD1L1	8	110471844	A	6		1	0	-/A
1	UTP23	8	117783718	A	6		1	0	-/A
1	MTBP	8	121514840	A	6		0	1	A/-
1	WDR67	8	124140521	T	9		1	0	-/T
1	FAM83A	8	124221697	A	7		1	0	-/A
1	ATAD2	8	124335279	T	7		1	0	-/T
1	ATAD2	8	124368685	A	8		0	1	A/-
1	ATAD2	8	124384893	T	9		1	0	-/T
1	ANXA13	8	124707762	T	8		0	1	T/-
1	POU5F1B	8	128428179	G	6		0	1	G/-
1	PHF20L1	8	133854842	A	7		0	1	A/-
1	BAI1	8	143558835	C	7		0	1	C/-
1	ARC	8	143695172	C	6		0	1	C/-
1	ZC3H3	8	144523242	C	6		0	1	C/-
1	MAPK15	8	144804319	G	6		0	1	G/-
1	FAM83H	8	144808844	G	6		1	0	-/G
1	SCRIB	8	144875032	G	6		0	1	G/-
1	SPATC1	8	145095784	C	6		0	1	C/-
1	OPLAH	8	145114852	C	6		1	0	-/C
1	CYC1	8	145150876	C	7		0	1	C/-
1	SLC39A4	8	145639157	G	7		1	0	-/G
1	DOCK8	9	405015	T	8		0	1	T/-
1	PPAPDC2	9	4663168	T	6		1	0	-/T
1	KIAA1432	9	5743708	A	6		1	0	-/A
1	KIAA2026	9	5968044	T	9		0	1	T/-
1	C9orf123	9	7799499	G	6		1	0	-/G
1	PTPRD	9	8341908	T	6		1	0	-/T
1	FREM1	9	14859192	A	6		1	0	-/A
1	CNTLN	9	17135271	G	7		0	1	G/-
1	SLC24A2	9	19786766	T	6		1	0	-/T
1	KIAA1797	9	20912931	A	7		0	1	A/-
1	MTAP	9	21854745	G	6		0	1	G/-
1	TEK	9	27158026	A	6		0	1	A/-
1	TAF1L	9	32633584	T	8		0	1	T/-
1	KIF24	9	34257623	T	8		1	0	-/T
1	C9orf131	9	35043650	C	6		0	1	C/-
1	FAM214B	9	35108148	C	7		0	1	C/-
1	ZCCHC7	9	37354810	A	6		1	0	-/A
1	CBWD6	9	69218549	T	6		1	0	-/T
1	TJP2	9	71854929	T	7		0	1	T/-
1	SMC5	9	72892274	A	6		1	0	-/A
1	VPS13A	9	79836219	A	8		0	1	A/-
1	VPS13A	9	79984308	T	7		0	1	T/-
1	NAA35	9	88631578	A	8		0	1	A/-
1	ZCCHC6	9	88967954	T	7		0	1	T/-
1	DAPK1	9	90321802	G	7		0	1	G/-
1	NOL8	9	95069255	T	7		0	1	T/-
1	NOL8	9	95078138	T	6		1	0	-/T
1	ZNF484	9	95609940	T	7		0	1	T/-
1	C9orf174	9	100136833	C	6		0	1	C/-
1	C9orf125	9	104239254	G	6		1	0	-/G
1	SMC2	9	106885501	A	7		0	1	A/-
1	ABCA1	9	107593323	C	7		1	0	-/C
1	FKTN	9	108363435	A	6		0	1	A/-
1	KIAA0368	9	114128807	A	6		1	0	-/A
1	UGCG	9	114695180	T	7		0	1	T/-
1	ZFP37	9	115806416	T	8		0	1	T/-
1	FKBP15	9	115941002	T	7		0	1	T/-
1	COL27A1	9	117052381	G	6		0	1	G/-
1	TLR4	9	120476084	A	6		1	0	-/A
1	OR1J1	9	125239885	A	6		1	0	-/A
1	OR1J2	9	125273386	T	7		1	0	-/T
1	OR1B1	9	125391771	A	7		1	0	-/A
1	OR1L3	9	125437936	T	8		0	1	T/-
1	NEK6	9	127110068	C	6		0	1	C/-
1	DNM1	9	131013112	G	8		1	0	-/G
1	GOLGA2	9	131022875	C	6		0	1	C/-
1	USP20	9	132620748	A	6		0	1	A/-
1	ABL1	9	133760024	C	6	x	0	1	C/-
1	LAMC3	9	133936594	C	6		0	1	C/-
1	PRRC2B	9	134350787	G	7		1	0	-/G
1	SETX	9	135171307	T	7		0	1	T/-
1	SETX	9	135203509	T	6		1	0	-/T
1	TTF1	9	135277388	T	8		1	0	-/T
1	TTF1	9	135277541	T	8		0	1	T/-
1	GTF3C4	9	135554691	A	7		0	1	A/-
1	TSC1	9	135772951	T	7	x	1	0	-/T
1	CEL	9	135946658	C	8		0	1	C/-
1	ABO	9	136131314	C	7		0	1	C/-
1	REXO4	9	136282859	T	7		0	1	T/-
1	ADAMTSL2	9	136439972	C	7		1	0	-/C
1	RXRA	9	137300040	C	7		1	0	-/C
1	COL5A1	9	137716448	C	6		0	1	C/-
1	PPP1R26	9	138379511	G	7		1	0	-/G
1	CAMSAP1	9	138714658	C	6		1	0	-/C
1	NOTCH1	9	139390736	G	6	x	0	1	G/-
1	MAMDC4	9	139752004	C	6		0	1	C/-
1	ABCA2	9	139904669	C	6		0	1	C/-
1	ANAPC2	9	140069815	G	6		0	1	G/-
1	NDOR1	9	140100743	C	6		1	0	-/C
1	RNF208	9	140115424	C	7		1	0	-/C
1	C9orf173	9	140146300	C	6		0	1	C/-
1	ZMYND19	9	140481542	C	7		1	0	-/C
1	IDI1	10	1087256	T	6		0	1	T/-
1	ADARB2	10	1230936	G	6		0	1	G/-
1	FAM208B	10	5765686	A	7		0	1	A/-
1	UPF2	10	12021070	C	6		1	0	-/C
1	CCDC3	10	12940431	G	7		1	0	-/G
1	FRMD4A	10	13696452	G	7		0	1	G/-
1	FAM188A	10	15876596	T	6		1	0	-/T
1	CUBN	10	16949569	A	7		1	0	-/A
1	ST8SIA6	10	17363321	T	8		0	1	T/-
1	NSUN6	10	18834895	A	7		0	1	A/-
1	C10orf140	10	21805463	C	6		1	0	-/CCTCCT
1	PIP4K2A	10	22830828	G	7		1	0	-/G
1	MYO3A	10	26462760	A	8		0	1	A/-
1	ANKRD26	10	27329038	T	8		0	1	T/-
1	YME1L1	10	27437920	T	6		0	1	T/-
1	PTCHD3	10	27702951	G	7		0	1	G/-
1	KIAA1462	10	30317562	G	6		1	0	-/G
1	KIAA1462	10	30336683	G	6		1	0	-/G
1	CUL2	10	35327850	T	8		0	1	T/-
1	ANKRD30A	10	37508780	A	6		0	1	A/-
1	ASAH2	10	52005194	A	8		0	1	A/-
1	PCDH15	10	55569283	T	6		1	0	-/T
1	BICC1	10	60558977	A	7		0	1	A/-
1	ANK3	10	61831290	T	8		0	1	T/-
1	HKDC1	10	71025493	A	6		0	1	A/-
1	VCL	10	75834559	A	6		0	1	A/-
1	KAT6B	10	76744954	A	6		1	0	-/A
1	LRIT1	10	86001144	G	7		1	0	-/G
1	STAMBPL1	10	90682146	A	8		0	1	A/-
1	SLC16A12	10	91203598	A	8		0	1	AA/-
1	KIF20B	10	91497987	A	7		0	1	A/-
1	KIF20B	10	91514406	T	7		0	1	T/-
1	HECTD2	10	93247481	A	8		1	0	-/A
1	IDE	10	94243045	A	8		1	0	-/A
1	IDE	10	94297296	T	7		1	0	-/T
1	NOC3L	10	96121615	T	6		0	1	TTT/-
1	HELLS	10	96352051	A	8		0	1	A/-
1	C10orf131	10	97697903	A	7		0	1	A/-
1	ZNF518A	10	97918856	A	9		0	1	A/-
1	TM9SF3	10	98336475	T	8		0	1	T/-
1	UBTD1	10	99330008	C	6		0	1	C/-
1	ZFYVE27	10	99510177	G	6		1	0	-/G
1	PDZD7	10	102789811	G	7		1	0	-/G
1	BTRC	10	103310573	C	7		1	0	-/C
1	HPS6	10	103826900	C	6		0	1	C/-
1	NOLC1	10	103919299	A	8		0	1	A/-
1	PSD	10	104176203	C	6		0	1	C/-
1	C10orf95	10	104210857	C	6		0	1	C/-
1	CNNM2	10	104679763	C	6		0	1	C/-
1	USMG5	10	105151974	T	7		0	1	T/-
1	PDCD11	10	105173019	T	6		1	0	-/T
1	CALHM3	10	105236263	G	6		0	1	G/-
1	SH3PXD2A	10	105484098	G	7		0	1	G/-
1	SMNDC1	10	112054992	T	6		1	0	-/T
1	C10orf118	10	115885658	T	6		0	1	T/-
1	ABLIM1	10	116196034	T	6		1	0	-/T
1	INPP5F	10	121551681	T	7		1	0	-/T
1	IKZF5	10	124754015	C	6		0	1	C/-
1	ZRANB1	10	126673561	A	10		0	1	A/-
1	CTBP2	10	126715137	G	6		1	0	-/G
1	MKI67	10	129913974	T	8		0	1	T/-
1	RIC8A	11	209895	C	6		0	1	CCC/-
1	IFITM5	11	299396	G	6		0	1	G/-
1	B4GALNT4	11	375700	G	7		0	1	G/-
1	B4GALNT4	11	380921	G	7		0	1	G/-
1	PHRF1	11	608263	C	7		0	1	C/-
1	AP2A2	11	970195	A	8		1	0	-/A
1	AP2A2	11	1008052	G	6		0	1	G/-
1	MUC2	11	1093684	C	6		1	0	-/C
1	BRSK2	11	1477640	G	7		0	1	G/-
1	LSP1	11	1902786	C	7		0	1	C/-
1	OR51B5	11	5364263	A	7		1	0	-/A
1	SMPD1	11	6413286	C	6		0	1	C/-
1	APBB1	11	6424925	G	6		0	1	G/-
1	ILK	11	6629392	C	6		0	1	C/-
1	DCHS1	11	6662142	G	7		0	1	G/-
1	SWAP70	11	9735070	A	8		0	1	A/-
1	ARNTL	11	13397174	A	6		0	1	A/-
1	SOX6	11	16133369	G	6		0	1	G/-
1	PLEKHA7	11	16822525	A	8		0	1	A/-
1	NAV2	11	20136312	C	6		0	1	C/-
1	LUZP2	11	24936024	A	8		1	0	-/A
1	MUC15	11	26587427	T	9		0	1	T/-
1	CCDC73	11	32635951	T	9		0	1	T/-
1	CCDC73	11	32637520	T	8		0	1	T/-
1	CSTF3	11	33117910	T	7		0	1	T/-
1	FBXO3	11	33792304	T	6		0	1	T/-
1	APIP	11	34910341	T	8		1	0	-/T
1	ALX4	11	44286624	G	6		0	1	G/-
1	CHRM4	11	46407278	G	7		0	1	G/-
1	AMBRA1	11	46456435	G	6		1	0	-/G
1	ARHGAP1	11	46702224	G	7		1	0	-/G
1	ARFGAP2	11	47196853	A	7		0	1	A/-
1	PACSIN3	11	47202104	C	6		1	0	-/C
1	AGBL2	11	47688542	A	6		1	0	-/A
1	OR4C12	11	50003129	T	7		0	1	T/-
1	OR4P4	11	55406142	T	7		1	0	-/T
1	OR5T3	11	56019856	T	6		0	1	T/-
1	CTNND1	11	57569589	A	6		0	1	A/-
1	OR5B12	11	58207028	A	8		0	1	A/-
1	FAM111A	11	58920414	T	6		1	0	-/T
1	DTX4	11	58958609	A	7		0	1	A/-
1	DTX4	11	58962827	C	7		0	1	C/-
1	OR5A1	11	59210951	T	8		0	1	T/-
1	CCDC86	11	60610160	C	6		0	1	C/-
1	VWCE	11	61044094	G	7		1	0	-/G
1	C11orf9	11	61539013	C	8		1	0	-/C
1	MTA2	11	62362016	C	6		0	1	C/-
1	SLC3A2	11	62649529	A	8		0	1	A/-
1	SLC22A6	11	62749334	A	7		0	1	A/-
1	SLC22A6	11	62752128	C	6		0	1	C/-
1	SLC22A10	11	63078479	A	9		1	0	-/A
1	HRASLS5	11	63257815	G	6		0	1	G/-
1	VEGFB	11	64004663	A	8		0	1	A/-
1	PLCB3	11	64032517	C	6		0	1	C/-
1	RPS6KA4	11	64138941	C	6		0	1	C/-
1	NRXN2	11	64375286	G	7		1	0	-/G
1	NRXN2	11	64457919	C	8		1	0	-/C
1	SLC22A20	11	64981481	C	8		0	1	C/-
1	PCNXL3	11	65403741	C	7		1	0	-/C
1	SF3B2	11	65836146	A	8		1	0	-/A
1	YIF1A	11	66055105	G	7		0	1	G/-
1	BRMS1	11	66108714	C	6		0	1	C/-
1	CCS	11	66366958	G	7		1	0	-/GG
1	SPTBN2	11	66469100	G	6		1	0	-/G
1	RPS6KB2	11	67196696	G	6		0	1	G/-
1	RPS6KB2	11	67200877	C	6		1	0	-/C
1	RPS6KB2	11	67201725	C	6		0	1	C/-
1	NDUFV1	11	67377028	G	6		0	1	G/-
1	TBX10	11	67402373	G	7		0	1	G/-
1	SHANK2	11	70666719	G	6		0	1	G/-
1	NUMA1	11	71716313	G	6	x	1	0	-/G
1	INPPL1	11	71942053	A	6		0	1	A/-
1	ARAP1	11	72437678	G	7		1	0	-/G
1	FAM168A	11	73122520	G	6		0	1	G/-
1	DNAJB13	11	73676057	A	7		0	1	A/-
1	USP35	11	77920856	C	8		1	0	-/C
1	ODZ4	11	78369502	C	6		0	1	C/-
1	ODZ4	11	78437214	T	6		1	0	-/T
1	PRSS23	11	86519701	T	6		0	1	T/-
1	KIAA1731	11	93433117	C	7		0	1	C/-
1	C11orf54	11	93486914	A	8		0	1	A/-
1	AMOTL1	11	94533230	G	6		0	1	G/-
1	CWC15	11	94704199	T	6		1	0	-/T
1	CEP57	11	95551991	A	7		0	1	A/-
1	CEP57	11	95555113	A	8		0	1	A/-
1	MMP20	11	102487558	T	8		1	0	-/T
1	CASP4	11	104825608	T	7		1	0	-/T
1	CWF19L2	11	107207381	A	7		0	1	A/-
1	CWF19L2	11	107299560	T	7		0	1	T/-
1	CUL5	11	107965658	A	8		0	1	A/-
1	ARHGAP20	11	110454273	T	6		1	0	-/T
1	LAYN	11	111425991	A	7		0	1	A/-
1	USP28	11	113673924	C	6		0	1	C/-
1	FAM55A	11	114393134	T	6		1	0	-/T
1	PCSK7	11	117079626	G	6	x	1	0	-/G
1	CEP164	11	117234201	G	6		1	0	-/G
1	BCL9L	11	118773004	G	6		0	1	G/-
1	BCL9L	11	118773106	G	7		0	1	G/-
1	NLRX1	11	119050611	G	7		0	1	G/-
1	TECTA	11	121036077	C	6		0	1	C/-
1	CRTAM	11	122720902	T	7		1	0	-/T
1	OR8B2	11	124252484	A	6		1	0	-/A
1	CDON	11	125875748	G	6		0	1	G/-
1	NFRKB	11	129752496	T	8		0	1	T/-
1	ADAMTS8	11	130278728	G	6		0	1	G/-
1	IGSF9B	11	133801456	G	7		1	0	-/G
1	NCAPD3	11	134027835	T	6		0	1	T/-
1	ERC1	12	1345991	A	7		0	1	A/-
1	PRMT8	12	3701466	G	6		0	1	G/-
1	RAD51AP1	12	4653063	A	7		0	1	A/-
1	NCAPD2	12	6639073	T	6		0	1	T/-
1	IFFO1	12	6657974	C	7		0	1	C/-
1	CHD4	12	6701672	T	7		0	1	T/-
1	CD4	12	6924043	G	7		0	1	G/-
1	CLEC4A	12	8281890	A	7		0	1	A/-
1	CLEC4A	12	8281937	A	8		0	1	A/-
1	CSDA	12	10862658	G	6		0	1	G/-
1	TAS2R8	12	10958846	A	8		1	0	-/A
1	TAS2R50	12	11139432	A	9		1	0	-/A
1	GPR19	12	12814274	T	8		0	1	T/-
1	PLEKHA5	12	19427545	A	7		0	1	A/-
1	PLEKHA5	12	19514518	A	8		0	1	A/-
1	RECQL	12	21644547	T	9		0	1	T/-
1	ITPR2	12	26568292	A	7		0	1	A/-
1	ITPR2	12	26775327	T	7		1	0	-/T
1	ASUN	12	27089724	A	6		0	1	A/-
1	KIF21A	12	39713784	T	9		0	1	T/-
1	SCAF11	12	46320926	T	6		0	1	T/-
1	FAM113B	12	47628998	G	6		0	1	G/-
1	RPAP3	12	48095315	T	7		0	1	T/-
1	C12orf68	12	48578410	G	7		1	0	-/G
1	MLL2	12	49426973	G	6	x	0	1	G/-
1	MLL2	12	49435199	G	6	x	0	1	G/-
1	MLL2	12	49445041	G	6	x	1	0	-/G
1	MLL2	12	49445526	G	7	x	1	0	-/G
1	MLL2	12	49448408	C	6	x	1	0	-/C
1	SLC11A2	12	51392999	A	6		0	1	A/-
1	SCN8A	12	52200421	C	6		0	1	C/-
1	KRT71	12	52946704	C	6		1	0	-/C
1	MAP3K12	12	53876615	C	6		0	1	C/-
1	CBX5	12	54645832	T	8		1	0	-/T
1	NCKAP1L	12	54903733	C	6		1	0	-/C
1	PDE1B	12	54971060	C	7		0	1	C/-
1	OR6C74	12	55641767	A	7		0	1	A/-
1	OR6C75	12	55759192	T	8		1	0	-/T
1	OR6C75	12	55759486	T	8		0	1	T/-
1	OR6C65	12	55794778	C	6		0	1	C/-
1	OR6C65	12	55795222	A	7		0	1	A/-
1	OR6C76	12	55820959	A	12		0	1	A/-
1	RDH5	12	56117812	G	7		1	0	-/G
1	DGKA	12	56347514	C	7		0	1	C/-
1	PA2G4	12	56505302	A	8		0	1	A/-
1	ESYT1	12	56536451	G	6		0	1	G/-
1	COQ10A	12	56663982	T	6		1	0	-/T
1	STAT2	12	56742817	G	7		0	1	G/-
1	APOF	12	56755285	C	6		0	1	C/-
1	NACA	12	57114418	G	7	x	0	1	G/-
1	LRP1	12	57572242	G	7		1	0	-/G
1	LRP1	12	57603940	C	8		0	1	C/-
1	R3HDM2	12	57648750	C	7		1	0	-/C
1	GLI1	12	57865761	C	6		0	1	C/-
1	MBD6	12	57921401	C	7		1	0	-/C
1	DCTN2	12	57927806	G	7		0	1	G/-
1	B4GALNT1	12	58025103	C	8		1	0	-/C
1	ZFC3H1	12	72038781	T	6		0	1	T/-
1	ZFC3H1	12	72051030	T	6		0	1	T/-
1	GLIPR1L2	12	75804255	A	7		0	1	A/-
1	NAP1L1	12	76446998	A	6		0	1	A/-
1	BBS10	12	76741530	T	7		0	1	T/-
1	E2F7	12	77419717	G	7		1	0	-/G
1	E2F7	12	77449858	T	6		1	0	-/T
1	NAV3	12	78388636	A	7		1	0	-/A
1	PAWR	12	80083900	G	7		0	1	G/-
1	PPFIA2	12	81675077	T	7		0	1	T/-
1	SLC6A15	12	85279790	A	7		0	1	A/-
1	TSPAN19	12	85423508	A	6		0	1	A/-
1	MGAT4C	12	86374168	T	7		0	1	T/-
1	CEP290	12	88487621	T	6		0	1	T/-
1	CEP290	12	88500637	T	7		0	1	T/-
1	CEP290	12	88512305	T	10		1	0	-/T
1	EEA1	12	93213103	T	7		0	1	T/-
1	VEZT	12	95650969	T	9		0	1	T/-
1	CCDC38	12	96292432	T	7		0	1	T/-
1	NEDD1	12	97339522	A	6		0	1	A/-
1	TMPO	12	98921672	A	8		0	1	A/-
1	TMPO	12	98940144	A	6		1	0	-/A
1	ACTR6	12	100601446	T	6		0	1	T/-
1	SCYL2	12	100711600	A	6		1	0	-/A
1	UTP20	12	101680157	T	8		0	1	T/-
1	HCFC2	12	104476535	A	8		0	1	A/-
1	USP30	12	109495865	C	6		1	0	-/C
1	C12orf51	12	112600860	G	7		1	0	-/G
1	C12orf51	12	112690349	G	7		0	1	G/-
1	SDS	12	113836340	G	6		1	0	-/G
1	SDSL	12	113872001	C	6		1	0	-/C
1	RNFT2	12	117187871	G	6		0	1	G/-
1	FBXO21	12	117624320	A	8		1	0	-/A
1	PXN	12	120653032	C	6		0	1	C/-
1	HNF1A	12	121432118	C	8		0	1	C/-
1	KDM2B	12	121970858	A	6		1	0	-/A
1	SETD1B	12	122248217	C	6		0	1	C/-
1	VPS33A	12	122748169	A	8		0	1	A/-
1	KNTC1	12	123087620	A	8		0	1	A/-
1	ABCB9	12	123416794	G	6		0	1	G/-
1	MPHOSPH9	12	123706322	A	8		0	1	A/-
1	SBNO1	12	123794283	T	8		1	0	-/T
1	DNAH10	12	124350591	A	6		0	1	A/-
1	NCOR2	12	124832801	G	7		1	0	-/G
1	NCOR2	12	124841251	G	7		1	0	-/G
1	SCARB1	12	125263076	G	6		0	1	G/-
1	RIMBP2	12	130921693	G	6		0	1	G/-
1	MPHOSPH8	13	20224194	A	7		1	0	-/A
1	ZMYM2	13	20638677	A	8		0	1	A/-
1	ZMYM2	13	20657094	A	8		0	1	A/-
1	XPO4	13	21362689	T	6		1	0	-/T
1	EFHA1	13	22095387	A	6		0	1	A/-
1	MIPEP	13	24384050	T	6		0	1	T/-
1	FLT3	13	28644741	A	6	x	1	0	-/A
1	RXFP2	13	32348800	T	6		0	1	T/-
1	BRCA2	13	32913837	A	7	x	0	1	A/-
1	N4BP2L1	13	32977306	T	6		1	0	-/T
1	PDS5B	13	33306278	C	7		0	1	C/-
1	PDS5B	13	33344580	A	9		0	1	A/-
1	PDS5B	13	33344888	A	9		0	1	A/-
1	NBEA	13	35730248	A	6		0	1	A/-
1	NBEA	13	36125104	A	7		1	0	-/A
1	DCLK1	13	36521571	A	6		1	0	-/A
1	NAA16	13	41941577	T	7		0	1	T/-
1	TSC22D1	13	45008838	G	7		1	0	-/G
1	SLC25A30	13	45985522	C	6		0	1	C/-
1	RNASEH2B	13	51530587	A	10		0	1	A/-
1	NEK3	13	52718079	T	6		1	0	-/T
1	PCDH8	13	53420216	C	7		0	1	C/-
1	DIAPH3	13	60385030	T	7		0	1	T/-
1	DIAPH3	13	60582719	A	7		1	0	-/A
1	PIBF1	13	73357634	A	7		0	1	A/-
1	MYCBP2	13	77844149	T	7		0	1	T/-
1	RNF219	13	79190057	A	7		1	0	-/A
1	RNF219	13	79191120	T	6		0	1	T/-
1	RBM26	13	79918807	T	9		0	1	T/-
1	RBM26	13	79940860	G	6		0	1	G/-
1	GPR180	13	95254184	G	7		1	0	-/G
1	ABCC4	13	95696016	T	9		0	1	T/-
1	DOCK9	13	99535363	A	6		0	1	A/-
1	PCCA	13	100925452	T	7		0	1	T/-
1	CCDC168	13	103386924	T	9		1	0	-/T
1	CCDC168	13	103390914	T	6		1	0	-/T
1	CCDC168	13	103400774	A	6		1	0	-/A
1	CCDC168	13	103401552	T	7		0	1	T/-
1	BIVM-ERCC5,ERCC5	13	103524612	A	9		1	0	-/A
1	MYO16	13	109661386	T	8		0	1	T/-
1	IRS2	13	110435263	G	6		1	0	-/G
1	COL4A2	13	111125481	C	6		0	1	C/-
1	COL4A2	13	111156324	C	7		0	1	C/-
1	OR11H12	14	19377903	A	8		1	0	-/A
1	OR4K5	14	20389294	T	7		0	1	T/-
1	OR4K13	14	20502017	T	7		0	1	T/-
1	RPGRIP1	14	21794313	A	6		1	0	-/A
1	CHD8	14	21859176	T	8		1	0	-/T
1	LRP10	14	23346616	C	6		0	1	C/-
1	CDH24	14	23517514	G	7		0	1	G/-
1	LRRC16B	14	24532703	C	7		1	0	-/C
1	ADCY4	14	24791301	G	6		0	1	G/-
1	NFATC4	14	24839017	G	6		0	1	G/-
1	NYNRIN	14	24877215	C	6		0	1	C/-
1	NYNRIN	14	24878306	G	6		1	0	-/G
1	G2E3	14	31074772	A	10		0	1	A/-
1	HEATR5A	14	31856515	A	7		0	1	A/-
1	ARHGAP5	14	32562675	T	6		0	1	T/-
1	KIAA0391	14	35592700	T	9		0	1	T/-
1	KIAA0391	14	35736064	T	7		1	0	-/T
1	NKX2-1	14	36988309	C	6	x	0	1	C/-
1	MIA2	14	39716860	A	8		1	0	-/A
1	FANCM	14	45645955	A	8		0	1	A/-
1	POLE2	14	50122534	A	7		0	1	A/-
1	ATL1	14	51099046	A	7		1	0	-/A
1	NIN	14	51237236	T	6	x	0	1	T/-
1	C14orf101	14	57052612	T	7		0	1	T/-
1	KCNH5	14	63174303	G	7		1	0	-/G
1	SYNE2	14	64688285	T	6		0	1	T/-
1	ZBTB1	14	64989362	A	8		0	1	A/-
1	GALNTL1	14	69800300	G	7		1	0	-/G
1	MED6	14	71051555	G	6		1	0	-/G
1	C14orf43	14	74205773	G	7		0	1	G/-
1	C14orf43	14	74206606	G	7		0	1	G/-
1	VRTN	14	74823931	C	6		1	0	-/C
1	VRTN	14	74824463	G	7		0	1	G/-
1	YLPM1	14	75230626	C	7		0	1	C/-
1	YLPM1	14	75264887	G	6		0	1	G/-
1	MLH3	14	75514338	T	8		0	1	T/-
1	MLH3	14	75514604	T	9		0	1	T/-
1	FLRT2	14	86087897	T	6		0	1	T/-
1	TRIP11	14	92472197	T	7	x	1	0	-/T
1	TRIP11	14	92472698	T	7	x	0	1	T/-
1	BTBD7	14	93720048	T	7		1	0	-/T
1	BTBD7	14	93760397	T	7		1	0	-/T
1	UNC79	14	94046589	G	7		0	1	G/-
1	SERPINA1	14	94844885	G	7		0	1	G/-
1	CLMN	14	95662949	T	8		1	0	-/TT
1	CLMN	14	95670202	A	7		0	1	A/-
1	PAPOLA	14	96997886	A	6		1	0	-/AA
1	HSP90AA1	14	102550211	T	6		0	1	T/-
1	MOK	14	102718303	T	9		0	1	T/-
1	ZNF839	14	102792753	A	7		0	1	A/-
1	KLC1	14	104124083	A	7		0	1	A/-
1	KIAA0284	14	105351860	C	6		0	1	C/-
1	KIAA0284	14	105353223	C	7		1	0	-/C
1	MTA1	14	105936239	G	7		0	1	G/-
1	NIPA2	15	23021239	T	8		1	0	-/T
1	MAGEL2	15	23890894	G	7		0	1	G/-
1	C15orf2	15	24921547	C	6		0	1	C/-
1	TRPM1	15	31330343	G	6		0	1	G/-
1	PGBD4	15	34396476	A	8		1	0	-/A
1	THBS1	15	39874527	C	6		0	1	C/-
1	GPR176	15	40093447	G	6		0	1	G/-
1	EIF2AK4	15	40282508	T	7		0	1	T/-
1	EIF2AK4	15	40326639	A	7		0	1	A/-
1	BMF	15	40396471	G	6		0	1	G/-
1	PHGR1	15	40648358	C	7		0	1	C/-
1	PHGR1	15	40648424	C	7		1	0	-/C
1	DISP2	15	40656015	G	6		1	0	-/G
1	CASC5	15	40917785	A	7		1	0	-/A
1	SPTBN5	15	42149883	C	6		1	0	-/C
1	CDAN1	15	43023886	C	6		1	0	-/C
1	TTBK2	15	43044488	T	6		1	0	-/T
1	ADAL	15	43641115	A	8		0	1	A/-
1	TUBGCP4	15	43672327	G	6		0	1	G/-
1	STRC	15	43893734	G	7		0	1	G/-
1	C15orf43	15	45270802	A	6		1	0	-/A
1	C15orf48	15	45724279	A	9		0	1	A/-
1	SLC12A1	15	48548096	A	6		1	0	-/A
1	CEP152	15	49036443	T	8		0	1	T/-
1	COPS2	15	49426244	A	7		0	1	A/-
1	COPS2	15	49426682	T	6		0	1	T/-
1	TRPM7	15	50925140	T	7		0	1	T/-
1	SCG3	15	52005561	A	6		1	0	-/A
1	UNC13C	15	54306720	T	6		0	1	T/-
1	PRTG	15	55912892	A	8		0	1	A/-
1	VPS13C	15	62244050	T	8		0	1	T/-
1	TLN2	15	63132738	A	6		0	1	A/-
1	HERC1	15	63986203	T	8		0	1	T/-
1	ZNF609	15	64967247	A	8		0	1	A/-
1	KBTBD13	15	65369795	G	6		0	1	G/-
1	SLC24A1	15	65917738	C	6		0	1	C/-
1	DENND4A	15	66030119	A	7		0	1	A/-
1	MAP2K5	15	67885289	A	7		1	0	-/A
1	ITGA11	15	68596150	C	6		0	1	C/-
1	GLCE	15	69560942	T	6		1	0	-/T
1	HCN4	15	73615394	C	7		0	1	C/-
1	CSPG4	15	75982428	C	6		1	0	-/C
1	IREB2	15	78768569	T	6		1	0	-/T
1	FAH	15	80464493	T	7		0	1	T/-
1	FSD2	15	83434691	C	6		0	1	C/-
1	WHAMM	15	83488097	A	7		0	1	A/-
1	ALPK3	15	85400267	A	7		0	1	A/-
1	PDE8A	15	85634360	A	7		0	1	A/-
1	MFGE8	15	89449863	T	6		0	1	T/-
1	POLG	15	89871988	C	6		0	1	C/-
1	C15orf42	15	90145118	T	6		0	1	T/-
1	KIF7	15	90190140	C	6		0	1	C/-
1	TTLL13	15	90794006	A	6		0	1	A/-
1	IQGAP1	15	91019925	A	8		0	1	A/-
1	BLM	15	91304139	A	9	x	0	1	A/-
1	RAB40C	16	677580	C	8		1	0	-/C
1	WDR90	16	709106	C	7		0	1	C/-
1	RHOT2	16	720529	C	6		0	1	C/-
1	NARFL	16	786269	T	7		1	0	-/T
1	CACNA1H	16	1270653	G	7		1	0	-/G
1	TPSG1	16	1273546	C	6		0	1	C/-
1	PTX4	16	1536186	G	7		0	1	G/-
1	CRAMP1L	16	1664792	C	6		1	0	-/C
1	C16orf73	16	1918176	T	7		0	1	T/-
1	TSC2	16	2108788	T	6	x	1	0	-/T
1	FLYWCH1	16	2983745	G	6		0	1	G/-
1	FLYWCH1	16	2987150	G	6		0	1	G/-
1	CLDN6	16	3065486	C	6		0	1	C/-
1	IL32	16	3119298	G	6		1	0	-/G
1	SLX4	16	3647657	G	7		1	0	-/G
1	GLIS2	16	4384871	G	7		1	0	-/G
1	FAM100A	16	4659687	G	6		0	1	G/-
1	UBN1	16	4909908	A	6		0	1	A/-
1	UBN1	16	4924668	A	6		1	0	-/A
1	SEC14L5	16	5061152	C	7		1	0	-/CC
1	NTAN1	16	15131931	T	8		1	0	-/T
1	KIAA0430	16	15727638	A	6		0	1	A/-
1	C16orf88	16	19725891	T	7		0	1	T/-
1	DNAH3	16	20996941	T	6		0	1	T/-
1	EEF2K	16	22262632	C	6		1	0	-/C
1	POLR3E	16	22339834	C	7		1	0	-/C
1	RBBP6	16	24581630	A	7		0	1	A/-
1	RBBP6	16	24582975	A	7		1	0	-/A
1	TNRC6A	16	24807240	A	7		0	1	A/-
1	ARHGAP17	16	24942180	G	7		0	1	G/-
1	GTF3C1	16	27506190	G	6		1	0	-/G
1	ATXN2L	16	28847350	G	6		0	1	G/-
1	ATP2A1	16	28909714	C	7		0	1	C/-
1	ATP2A1	16	28913640	C	8		1	0	-/C
1	INO80E	16	30007665	A	9		0	1	A/-
1	FAM57B	16	30041821	C	7		1	0	-/C
1	TBX6	16	30100078	C	7		0	1	C/-
1	ZNF764	16	30567242	G	6		0	1	G/-
1	ZNF688	16	30581351	C	6		0	1	C/-
1	ZNF668	16	31072706	G	7		0	1	G/-
1	PRSS36	16	31150582	G	6		1	0	-/G
1	PRSS36	16	31151942	G	7		0	1	G/-
1	ITGAD	16	31422476	C	6		0	1	C/-
1	VPS35	16	46695735	T	7		0	1	T/-
1	HEATR3	16	50104131	A	6		1	0	-/A
1	NOD2	16	50745331	G	7		0	1	G/-
1	CHD9	16	53261367	A	6		0	1	A/-
1	IRX3	16	54318680	C	7		0	1	C/-
1	IRX3	16	54319087	C	7		1	0	-/C
1	IRX5	16	54967131	C	8		1	0	-/C
1	IRX6	16	55360482	C	6		1	0	-/C
1	NUDT21	16	56485066	C	6		0	1	C/-
1	SLC12A3	16	56906328	C	6		0	1	C/-
1	KIFC3	16	57805594	C	6		0	1	C/-
1	CNOT1	16	58577316	A	13		0	1	A/-
1	CNOT1	16	58589340	A	7		0	1	A/-
1	CKLF	16	66599895	A	8		0	1	A/-
1	CMTM1	16	66603930	T	8		0	1	T/-
1	HSF4	16	67201666	G	7		0	1	G/-
1	FAM65A	16	67572615	C	6		1	0	-/C
1	NFATC3	16	68225521	G	6		1	0	-/G
1	PLA2G15	16	68289855	G	7		0	1	G/-
1	ZFP90	16	68598463	A	8		0	1	A/-
1	TMCO7	16	68896879	G	6		1	0	-/G
1	NFAT5	16	69727260	T	6		0	1	T/-
1	MTSS1L	16	70697668	G	6		0	1	G/-
1	HYDIN	16	70969918	T	6		0	1	T/-
1	HYDIN	16	71052314	T	7		0	1	T/-
1	ZNF23	16	71483562	A	7		1	0	-/A
1	ZFHX3	16	72821960	G	7		1	0	-/G
1	ZFHX3	16	72822586	G	7		1	0	-/G
1	GLG1	16	74525009	C	6		1	0	-/C
1	PKD1L2	16	81164066	G	6		0	1	G/-
1	OSGIN1	16	83999552	G	6		0	1	G/-
1	TAF1C	16	84213651	G	8		1	0	-/G
1	ATP2C2	16	84485594	C	6		1	0	-/C
1	KLHDC4	16	87788891	A	6		1	0	-/A
1	ZNF469	16	88500316	G	7		1	0	-/G
1	ZNF469	16	88504852	G	7		0	1	G/-
1	ZC3H18	16	88694417	G	6		0	1	G/-
1	CDT1	16	88872444	C	6		0	1	C/-
1	ABR	17	909374	G	7		1	0	-/G
1	WDR81	17	1638935	C	6		0	1	C/-
1	OR1A2	17	3101552	T	7		1	0	-/T
1	SPNS3	17	4348456	C	6		0	1	C/-
1	SMTNL2	17	4496274	C	6		0	1	C/-
1	DERL2	17	5386170	A	6		0	1	A/-
1	WSCD1	17	6012979	C	6		1	0	-/C
1	BCL6B	17	6927858	C	7		0	1	C/-
1	PLSCR3	17	7294059	C	7		1	0	-/C
1	ZBTB4	17	7370110	G	8		1	0	-/G
1	POLR2A	17	7388098	C	7		0	1	C/-
1	EFNB3	17	7612856	C	7		1	0	-/C
1	KCNAB3	17	7829259	A	6		1	0	-/A
1	PFAS	17	8167585	C	7		0	1	C/-
1	SPDYE4	17	8661675	G	6		0	1	G/-
1	MYH1	17	10419786	C	6		0	1	C/-
1	FLCN	17	17119709	G	8		0	1	G/-
1	NT5M	17	17250190	C	7		1	0	-/C
1	RAI1	17	17699359	C	7		1	0	-/C
1	FLII	17	18152148	C	6		1	0	-/C
1	TOP3A	17	18217965	T	7		0	1	T/-
1	ALDH3A1	17	19641649	G	6		0	1	G/-
1	ULK2	17	19729453	T	7		1	0	-/T
1	SSH2	17	27958188	G	6		0	1	G/-
1	SSH2	17	27963295	G	7		0	1	G/-
1	NSRP1	17	28505167	A	8		0	1	A/-
1	ATAD5	17	29219769	T	6		0	1	T/-
1	EVI2B	17	29632567	A	7		0	1	A/-
1	SUZ12	17	30300239	A	7	x	0	1	A/-
1	SLFN11	17	33690729	T	6		1	0	-/T
1	SLFN12	17	33749493	A	8		1	0	-/A
1	SLFN12L	17	33806620	A	7		1	0	-/A
1	MMP28	17	34094826	G	6		1	0	-/G
1	GGNBP2	17	34937896	A	6		0	1	A/-
1	LHX1	17	35300395	C	7		1	0	-/C
1	ARHGAP23	17	36619093	C	6		0	1	C/-
1	MLLT6	17	36872060	G	6	x	0	1	G/-
1	THRA	17	38245667	C	6		0	1	C/-
1	NR1D1	17	38253389	G	6		0	1	G/-
1	IGFBP4	17	38600104	C	7		0	1	C/-
1	KRTAP3-1	17	39165169	G	6		0	1	G/-
1	KRTAP2-4	17	39221762	G	6		0	1	G/-
1	TTC25	17	40117463	A	7		1	0	-/A
1	KCNH4	17	40328259	C	7		1	0	-/C
1	PLEKHH3	17	40824223	G	6		1	0	-/G
1	PLEKHH3	17	40825491	C	6		1	0	-/C
1	WNK4	17	40939870	G	7		0	1	G/-
1	BRCA1	17	41244219	T	6	x	1	0	-/T
1	BRCA1	17	41245587	T	8	x	0	1	T/-
1	ETV4	17	41610701	G	7	x	0	1	G/-
1	HDAC5	17	42157801	G	7		0	1	G/-
1	C17orf104	17	42743932	A	6		1	0	-/A
1	C17orf104	17	42744417	A	7		0	1	A/-
1	PLEKHM1	17	43531274	G	6		0	1	G/-
1	TBX21	17	45822290	C	6		0	1	C/-
1	NFE2L1	17	46128959	C	7		1	0	-/C
1	HOXB3	17	46629737	G	8		1	0	-/G
1	COL1A1	17	48266301	G	6	x	0	1	G/-
1	TMEM92	17	48356343	C	6		1	0	-/C
1	XYLT2	17	48433967	C	7		1	0	-/C
1	EPN3	17	48618321	C	6		1	0	-/C
1	CUEDC1	17	55962594	G	6		0	1	G/-
1	TEX14	17	56679908	T	6		1	0	-/T
1	MED13	17	60033826	T	7		0	1	T/-
1	MED13	17	60072519	T	7		0	1	T/-
1	2010-03-01	17	60814569	T	6		0	1	T/-
1	TANC2	17	61466005	A	6		0	1	A/-
1	GNA13	17	63010865	T	6		0	1	T/-
1	CEP112	17	64023620	T	7		0	1	T/-
1	ABCA9	17	66985955	T	6		1	0	-/T
1	ABCA9	17	66992093	A	6		0	1	A/-
1	ABCA6	17	67125767	A	8		0	1	A/-
1	SOX9	17	70119781	G	6		1	0	-/G
1	FAM104A	17	71228437	C	7		1	0	-/C
1	SDK2	17	71394282	G	7		1	0	-/G
1	KIAA0195	17	73491063	C	7		0	1	C/-
1	KIAA0195	17	73493881	C	7		0	1	C/-
1	CASKIN2	17	73498973	G	8		1	0	-/G
1	CASKIN2	17	73501069	G	6		0	1	G/-
1	UBE2O	17	74396555	G	6		0	1	G/-
1	DNAH17	17	76425217	G	7		0	1	G/-
1	CBX4	17	77808751	G	7		0	1	G/-
1	BAIAP2	17	79077889	A	6		0	1	A/-
1	TSPAN10	17	79612317	G	7		0	1	G/-
1	RAB40B	17	80615786	G	8		1	0	-/G
1	NDC80	18	2601452	A	7		0	1	A/-
1	EMILIN2	18	2906978	C	6		0	1	C/-
1	ANKRD12	18	9256062	A	8		0	1	A/-
1	PIEZO2	18	10731453	T	7		0	1	T/-
1	PIEZO2	18	10741064	T	8		1	0	-/T
1	RNMT	18	13734551	T	6		0	1	T/-
1	ROCK1	18	18567059	T	7		0	1	T/-
1	RBBP8	18	20572853	A	9		0	1	A/-
1	LAMA3	18	21495340	A	7		0	1	A/-
1	OSBPL1A	18	21745097	T	8		0	1	T/-
1	TRAPPC8	18	29453418	A	8		1	0	-/A
1	C18orf34	18	30806796	T	6		0	1	T/-
1	TCEB3B	18	44560778	C	6		0	1	C/-
1	ZBTB7C	18	45567076	C	7		0	1	C/-
1	SMAD7	18	46474795	G	8		0	1	G/-
1	ATP8B1	18	55365040	T	8		0	1	T/-
1	ALPK2	18	56202092	T	6		1	0	-/T
1	ALPK2	18	56246941	A	7		0	1	A/-
1	MALT1	18	56348561	C	6	x	1	0	-/C
1	ZNF532	18	56587480	T	6		1	0	-/T
1	PIGN	18	59752471	A	6		1	0	-/A
1	VPS4B	18	61074688	T	7		1	0	-/T
1	SERPINB12	18	61228376	A	7		1	0	-/A
1	TSHZ1	18	72998443	C	6		0	1	C/-
1	ZNF516	18	74091614	G	6		0	1	G/-
1	ZNF236	18	74593430	A	9		0	1	A/-
1	ADNP2	18	77894261	C	7		1	0	-/C
1	RNF126	19	648216	G	6		0	1	G/-
1	PALM	19	746420	G	6		1	0	-/G
1	PRTN3	19	846269	C	6		0	1	C/-
1	C19orf26	19	1231034	G	8		0	1	G/-
1	MUM1	19	1364552	A	6		0	1	A/-
1	DAZAP1	19	1430254	C	7		0	1	C/-
1	SF3A2	19	2248077	C	6		0	1	C/-
1	PIP5K1C	19	3633460	G	7		0	1	G/-
1	ZFR2	19	3825331	G	7		1	0	-/G
1	ZFR2	19	3831693	G	6		0	1	G/-
1	SEMA6B	19	4552450	A	6		0	1	A/-
1	ARRDC5	19	4902846	G	6		0	1	G/-
1	PTPRS	19	5222731	G	7		0	1	G/-
1	SAFB2	19	5590343	C	7		0	1	C/-
1	HSD11B1L	19	5687962	G	6		1	0	-/G
1	LONP1	19	5699149	G	6		1	0	-/G
1	INSR	19	7117191	C	6		0	1	C/-
1	FBN3	19	8193949	G	7		0	1	G/-
[truncated: 246 more rows]

## Sheet: Exonic substitutions
All somatic substitutions in exonic regions together with their recurrence rate as identified by whole-genome and -exome sequencing (n=16)
Nr of samples affected	Gene	Chromosome	Position	Reference base	Mutated base	Cancer Census Gene
4	KRAS	12	25398281	C	T	x
3	ZNF648	1	182026325	C	G
3	KRAS	12	25398284	C	G/T/A	x
2	ZZEF1	17	3954155	G	A
2	ZNF513	2	27601448	C	T
2	ZNF135	19	58578297	T	G/C
2	VWF	12	6085298	G	T
2	TSN	2	122522801	G	A
2	TRABD	22	50636520	C	T
2	TP53	17	7577121	G	A	x
2	TMEM161B	5	87494827	G	A
2	TGFB1	19	41850733	G	A
2	TBC1D4	13	75861013	G	A
2	SETD1B	12	122255008	G	A
2	SEMA4G	10	102732783	A	G
2	RBMXL2	11	7111018	C	T
2	PTEN	10	89717672	C	T	x
2	PRAMEF2	1	12918997	A	C
2	PPP2R1A	19	52715982	C	T	x
2	PLEKHM1	17	43552861	G	A
2	PKD2L2	5	137244512	G	A
2	PIK3CA	3	178952085	A	G	x
2	PIK3CA	3	178916726	G	A	x
2	PDE3A	12	20801776	C	T
2	PAX8	2	113993008	G	A	x
2	PAPOLB	7	4901094	G	A
2	ORC5	7	103838229	A	G
2	OR2M3	1	248366830	C	T
2	ODF2L	1	86848006	T	C
2	NXPH1	7	8790884	C	T
2	NPAS3	14	33684596	C	T
2	NLRP8	19	56466500	C	T
2	NCK1	3	136664528	C	T
2	MLH1	3	37091990	G	A	x
2	KANK1	9	712701	C	T
2	IQGAP2	5	75954332	T	C
2	INSRR	1	156812212	C	T
2	GPSM1	9	139233018	G	T/A
2	GFM2	5	74034388	G	A
2	FNDC1	6	159653660	G	A
2	FNBP4	11	47744609	T	A
2	ERBB2	17	37879658	G	A	x
2	DAB1	1	57480631	C	A
2	COL27A1	9	116971982	G	A
2	CHD4	12	6682396	G	A
2	CENPA	2	27015000	C	T
2	CDH8	16	62055206	C	G
2	CATSPER1	11	65790531	G	A
2	C6orf118	6	165715540	C	T
2	C4orf31	4	121958294	G	A
2	C10orf118	10	115885670	G	A
2	ALPK2	18	56204927	G	A
2	AGRN	1	979496	C	T
2	AFF3	2	100210148	C	T
2	ADAP2	17	29283445	C	T
1	ZZZ3	1	78098170	T	C
1	ZZZ3	1	78050328	T	A
1	ZZEF1	17	3992061	G	A
1	ZZEF1	17	3988990	G	A
1	ZZEF1	17	3979987	C	T
1	ZZEF1	17	3968037	T	C
1	ZZEF1	17	3954279	G	A
1	ZZEF1	17	3954246	A	G
1	ZZEF1	17	3926024	C	T
1	ZZEF1	17	3924484	G	T
1	ZZEF1	17	3924453	G	A
1	ZZEF1	17	3920694	G	A
1	ZYX	7	143086956	C	T
1	ZYX	7	143085593	C	T
1	ZYG11B	1	53279272	T	C
1	ZYG11A	1	53347187	C	T
1	ZXDC	3	126191113	A	G
1	ZXDB	X	57619303	C	A
1	ZXDB	X	57618747	G	A
1	ZXDA	X	57936464	T	C
1	ZXDA	X	57935818	T	C
1	ZXDA	X	57935005	G	T
1	ZXDA	X	57934984	A	G
1	ZWINT	10	58118386	C	A
1	ZW10	11	113614696	C	T
1	ZSWIM6	5	60837744	C	T
1	ZSWIM6	5	60628473	C	T
1	ZSWIM5	1	45553736	G	A
1	ZSWIM5	1	45516863	G	A
1	ZSWIM5	1	45501444	A	G
1	ZSWIM4	19	13941681	G	A
1	ZSWIM4	19	13941183	G	A
1	ZSWIM3	20	44506790	G	A
1	ZSWIM3	20	44506019	C	T
1	ZSWIM2	2	187693073	G	T
1	ZSCAN5B	19	56704352	G	A
1	ZSCAN5A	19	56735071	G	A
1	ZSCAN5A	19	56733209	T	C
1	ZSCAN5A	19	56733175	C	T
1	ZSCAN4	19	58189870	T	C
1	ZSCAN4	19	58189854	A	G
1	ZSCAN4	19	58187730	C	T
1	ZSCAN30	18	32843496	G	T
1	ZSCAN29	15	43653684	G	A
1	ZSCAN23	6	28402369	A	G
1	ZSCAN22	19	58850365	C	T
1	ZSCAN22	19	58850349	G	A
1	ZSCAN21	7	99661506	G	A
1	ZSCAN21	7	99654965	C	T
1	ZSCAN21	7	99654632	G	A
1	ZSCAN20	1	33945303	G	A
1	ZSCAN18	19	58601615	G	A
1	ZSCAN18	19	58601388	G	A
1	ZSCAN16	6	28097593	C	T
1	ZSCAN10	16	3142256	C	T
1	ZSCAN10	16	3142156	T	C
1	ZSCAN10	16	3140314	C	T
1	ZSCAN10	16	3139329	G	A
1	ZSCAN1	19	58549471	G	T
1	ZRANB3	2	135960483	A	T
1	ZRANB1	10	126673389	A	G
1	ZPLD1	3	102189278	C	T
1	ZPLD1	3	102187808	C	T
1	ZP4	1	238053926	G	T
1	ZP4	1	238053251	G	A
1	ZP3	7	76058885	C	T
1	ZP2	16	21213079	T	C
1	ZP1	11	60640729	G	A
1	ZNRF4	19	5456610	A	G
1	ZNRF4	19	5455838	C	T
1	ZNRF3	22	29439321	C	T
1	ZNRF2	7	30395444	T	C
1	ZNHIT6	1	86173723	A	T
1	ZNHIT6	1	86167884	A	G
1	ZNHIT6	1	86146539	T	C
1	ZNHIT3	17	34848711	C	T
1	ZNFX1	20	47865194	C	T
1	ZNF99	19	22940762	T	A
1	ZNF99	19	22940441	G	C
1	ZNF99	19	22940398	C	T
1	ZNF99	19	22939885	T	C
1	ZNF93	19	20044992	T	C
1	ZNF93	19	20026162	G	A
1	ZNF92	7	64863334	T	C
1	ZNF91	19	23556564	T	A
1	ZNF91	19	23545123	G	A
1	ZNF91	19	23543700	G	C
1	ZNF91	19	23543533	C	A
1	ZNF90	19	20230098	G	T
1	ZNF90	19	20228771	T	C
1	ZNF878	19	12155820	T	C
1	ZNF878	19	12155706	G	A
1	ZNF878	19	12155175	G	T
1	ZNF862	7	149557820	C	T
1	ZNF860	3	32031812	C	T
1	ZNF853	7	6662484	G	A
1	ZNF853	7	6661902	C	T
1	ZNF846	19	9872822	A	G
1	ZNF845	19	53855145	C	T
1	ZNF844	19	12187256	C	T
1	ZNF844	19	12186697	A	C
1	ZNF841	19	52579307	G	A
1	ZNF841	19	52570057	G	T
1	ZNF841	19	52569190	C	T
1	ZNF837	19	58880457	G	A
1	ZNF837	19	58879695	G	A
1	ZNF837	19	58879116	G	A
1	ZNF836	19	52659236	C	T
1	ZNF836	19	52659052	A	G
1	ZNF835	19	57175665	G	A
1	ZNF835	19	57175573	T	G
1	ZNF835	19	57175572	T	C
1	ZNF835	19	57175460	C	T
1	ZNF835	19	57175449	T	C
1	ZNF831	20	57767939	T	G
1	ZNF831	20	57766859	G	T
1	ZNF831	20	57766693	G	A
1	ZNF831	20	57766515	G	A
1	ZNF831	20	57766203	G	A
1	ZNF830	17	33289080	G	A
1	ZNF829	19	37382979	T	C
1	ZNF828	13	115091119	T	C
1	ZNF828	13	115090172	G	T
1	ZNF827	4	146823925	G	A
1	ZNF823	19	11833621	G	A
1	ZNF821	16	71898823	C	T
1	ZNF821	16	71893937	C	T
1	ZNF816	19	53454831	G	A
1	ZNF816	19	53454661	T	C
1	ZNF814	19	58384611	T	C
1	ZNF814	19	58384511	A	G
1	ZNF814	19	58384490	G	T
1	ZNF813	19	53994214	A	G
1	ZNF81	X	47774504	T	C
1	ZNF808	19	53058347	T	C
1	ZNF804B	7	88965629	G	T
1	ZNF804B	7	88963947	A	G
1	ZNF804B	7	88963200	A	C
1	ZNF804A	2	185801485	C	A
1	ZNF804A	2	185798382	C	T
1	ZNF800	7	127013712	C	T
1	ZNF800	7	127013660	G	T
1	ZNF80	3	113955327	T	G
1	ZNF8	19	58805994	G	A
1	ZNF8	19	58805539	C	T
1	ZNF793	19	38023342	C	T
1	ZNF792	19	35449907	G	A
1	ZNF791	19	12739129	C	T
1	ZNF790	19	37310074	C	A
1	ZNF790	19	37309654	T	C
1	ZNF789	7	99084424	A	G
1	ZNF787	19	56599620	G	T
1	ZNF786	7	148767621	G	A
1	ZNF785	16	30594224	C	T
1	ZNF784	19	56133590	C	T
1	ZNF784	19	56133319	C	T
1	ZNF782	9	99607192	T	C
1	ZNF781	19	38160611	C	T
1	ZNF780B	19	40541162	C	A
1	ZNF780B	19	40541034	T	A
1	ZNF778	16	89294281	G	A
1	ZNF778	16	89294253	C	T
1	ZNF777	7	149153011	A	T
1	ZNF777	7	149152985	A	T
1	ZNF777	7	149152435	C	T
1	ZNF777	7	149129019	C	T
1	ZNF777	7	149128968	C	T
1	ZNF776	19	58265554	A	G
1	ZNF776	19	58265016	T	G
1	ZNF775	7	150095152	C	A
1	ZNF774	15	90904155	G	A
1	ZNF774	15	90903555	C	A
1	ZNF774	15	90902159	G	A
1	ZNF773	19	58018577	T	G
1	ZNF773	19	58018020	C	T
1	ZNF773	19	58017853	C	T
1	ZNF772	19	57987104	C	T
1	ZNF770	15	35275336	T	C
1	ZNF770	15	35273733	G	A
1	ZNF770	15	35273729	G	A
1	ZNF768	16	30537324	C	T
1	ZNF768	16	30537274	G	T
1	ZNF768	16	30536940	G	A
1	ZNF768	16	30536054	G	T
1	ZNF765	19	53912234	A	G
1	ZNF765	19	53911543	C	T
1	ZNF764	16	30566781	C	T
1	ZNF761	19	53958830	A	G
1	ZNF76	6	35260353	G	A
1	ZNF76	6	35253975	G	A
1	ZNF75D	X	134426392	G	A
1	ZNF75A	16	3367832	G	A
1	ZNF750	17	80788262	G	A
1	ZNF750	17	80788248	T	C
1	ZNF750	17	80788045	T	C
1	ZNF749	19	57956556	C	A
1	ZNF749	19	57954785	G	A
1	ZNF747	16	30544398	C	T
1	ZNF746	7	149174040	T	C
1	ZNF746	7	149172181	G	A
1	ZNF74	22	20760611	C	T
1	ZNF732	4	265767	A	G
1	ZNF727	7	63538654	A	G
1	ZNF727	7	63538216	A	G
1	ZNF721	4	438116	A	G
1	ZNF721	4	438048	T	C
1	ZNF717	3	75832470	T	A
1	ZNF717	3	75790781	T	C
1	ZNF717	3	75788200	G	A
1	ZNF717	3	75788195	A	T
1	ZNF717	3	75788192	T	C
1	ZNF717	3	75788137	C	T
1	ZNF717	3	75786659	T	C
1	ZNF713	7	55990961	A	G
1	ZNF713	7	55990863	G	T
1	ZNF710	15	90611180	C	T
1	ZNF710	15	90610786	C	T
1	ZNF71	19	57134064	A	G
1	ZNF71	19	57133926	A	G
1	ZNF71	19	57133658	T	G
1	ZNF71	19	57133444	G	A
1	ZNF704	8	81553697	C	A
1	ZNF704	8	81553680	T	G
1	ZNF703	8	37555590	C	A
1	ZNF700	19	12059686	T	C
1	ZNF70	22	24086398	G	A
1	ZNF7	8	146054916	G	A
1	ZNF699	19	9408663	T	C
1	ZNF697	1	120166247	A	G
1	ZNF697	1	120165629	A	G
1	ZNF696	8	144378474	C	T
1	ZNF696	8	144378227	G	T
1	ZNF696	8	144378151	C	T
1	ZNF695	1	247151160	T	C
1	ZNF695	1	247150304	C	T
1	ZNF692	1	249148249	T	C
1	ZNF689	16	30616691	G	A
1	ZNF689	16	30616202	G	A
1	ZNF687	1	151263599	G	A
1	ZNF687	1	151259929	G	A
1	ZNF687	1	151259516	C	T
1	ZNF681	19	23927087	T	C
1	ZNF678	1	227842420	G	A
1	ZNF677	19	53754798	A	T
1	ZNF677	19	53747060	C	T
1	ZNF677	19	53741102	C	T
1	ZNF676	19	22363579	A	G
1	ZNF676	19	22362973	A	G
1	ZNF675	19	23844990	T	C
1	ZNF674	X	46359432	C	A
1	ZNF672	1	249141800	G	A
1	ZNF670	1	247201063	A	T
1	ZNF668	16	31073583	G	A
1	ZNF668	16	31073279	C	T
1	ZNF667	19	56972091	T	C
1	ZNF667	19	56953207	T	C
1	ZNF664	12	124497388	G	A
1	ZNF655	7	99170225	G	A
1	ZNF655	7	99159558	G	T
1	ZNF653	19	11598588	C	T
1	ZNF649	19	52400152	A	G
1	ZNF649	19	52394885	A	T
1	ZNF649	19	52394421	C	T
1	ZNF649	19	52394215	G	A
1	ZNF648	1	182025987	G	T
1	ZNF646	16	31092985	G	C
1	ZNF646	16	31091246	C	T
1	ZNF646	16	31090940	C	T
1	ZNF645	X	22291312	G	A
1	ZNF644	1	91404596	A	G
1	ZNF642	1	40960872	G	T
1	ZNF641	12	48739255	G	T
1	ZNF639	3	179051352	C	T
1	ZNF638	2	71607396	T	C
1	ZNF638	2	71591145	A	T
1	ZNF630	X	47920211	G	C
1	ZNF630	X	47919493	T	A
1	ZNF629	16	30794052	G	A
1	ZNF629	16	30793945	C	T
1	ZNF629	16	30793768	G	A
1	ZNF626	19	20807708	G	T
1	ZNF626	19	20807548	T	C
1	ZNF624	17	16526710	T	C
1	ZNF623	8	144732585	T	C
1	ZNF622	5	16463255	G	A
1	ZNF621	3	40574004	C	T
1	ZNF618	9	116779003	C	T
1	ZNF616	19	52619216	G	A
1	ZNF615	19	52497297	A	G
1	ZNF615	19	52496161	A	G
1	ZNF614	19	52521325	G	A
1	ZNF614	19	52519855	T	C
1	ZNF614	19	52519564	G	T
1	ZNF611	19	53208878	C	T
1	ZNF611	19	53208344	C	T
1	ZNF609	15	64966614	A	G
1	ZNF608	5	123983128	T	C
1	ZNF607	19	38200646	G	T
1	ZNF606	19	58512097	C	T
1	ZNF606	19	58490758	A	G
1	ZNF600	19	53270971	G	A
1	ZNF599	19	35251008	C	T
1	ZNF598	16	2052362	C	T
1	ZNF598	16	2050414	G	T
1	ZNF598	16	2049029	C	T
1	ZNF598	16	2048744	G	A
1	ZNF598	16	2048718	T	C
1	ZNF596	8	195813	T	A
1	ZNF595	4	87266	A	G
1	ZNF595	4	87167	C	A
1	ZNF595	4	86796	A	G
1	ZNF595	4	86192	A	T
1	ZNF595	4	86191	C	A
1	ZNF594	17	5086249	T	C
1	ZNF592	15	85345224	C	T
1	ZNF592	15	85326799	G	A
1	ZNF587	19	58370983	T	C
1	ZNF586	19	58290471	C	T
1	ZNF585B	19	37697982	G	T
1	ZNF585A	19	37644147	C	G
1	ZNF585A	19	37642862	A	C
1	ZNF583	19	56925759	G	A
1	ZNF582	19	56895964	C	T
1	ZNF581	19	56155988	T	C
1	ZNF579	19	56090846	G	A
1	ZNF579	19	56090296	T	C
1	ZNF579	19	56090220	C	G
1	ZNF579	19	56089591	G	A
1	ZNF578	19	53015319	G	T
1	ZNF577	19	52376085	C	T
1	ZNF575	19	44039574	A	G
1	ZNF574	19	42584749	C	T
1	ZNF571	19	38056599	A	G
1	ZNF570	19	37975775	G	A
1	ZNF570	19	37975684	A	G
1	ZNF568	19	37441193	C	T
1	ZNF567	19	37211068	A	G
1	ZNF567	19	37203724	C	T
1	ZNF566	19	36940825	A	T
1	ZNF566	19	36940635	T	C
1	ZNF563	19	12429710	T	C
1	ZNF562	19	9767279	G	A
1	ZNF562	19	9767269	A	T
1	ZNF562	19	9764035	T	C
1	ZNF561	19	9721117	C	T
1	ZNF560	19	9577932	C	T
1	ZNF557	19	7083628	C	T
1	ZNF555	19	2853168	G	T
1	ZNF555	19	2853133	G	T
1	ZNF554	19	2833891	C	T
1	ZNF552	19	58319906	C	A
1	ZNF551	19	58199342	T	C
1	ZNF551	19	58198338	C	A
1	ZNF550	19	58067704	C	T
1	ZNF550	19	58058406	G	A
1	ZNF550	19	58058383	C	T
1	ZNF549	19	58049853	T	C
1	ZNF549	19	58049833	A	G
1	ZNF548	19	57909837	A	G
1	ZNF544	19	58773611	C	T
1	ZNF544	19	58773574	A	C
1	ZNF544	19	58773465	G	T
1	ZNF544	19	58772533	C	A
1	ZNF544	19	58772314	G	A
1	ZNF543	19	57840432	G	A
1	ZNF543	19	57840329	T	C
1	ZNF543	19	57839971	G	A
1	ZNF543	19	57839156	C	T
1	ZNF540	19	38103787	G	T
1	ZNF540	19	38103616	C	T
1	ZNF540	19	38103311	A	G
1	ZNF536	19	31040303	C	A
1	ZNF536	19	31039843	A	T
1	ZNF536	19	31039033	A	T
1	ZNF536	19	30934888	G	A
1	ZNF534	19	52941953	G	A
1	ZNF534	19	52941270	A	G
1	ZNF532	18	56651549	G	A
1	ZNF532	18	56648757	G	A
1	ZNF532	18	56587069	T	C
1	ZNF530	19	58118573	T	A
1	ZNF529	19	37038791	A	C
1	ZNF527	19	37880746	C	A
1	ZNF526	19	42730425	A	G
1	ZNF526	19	42729732	G	A
1	ZNF524	19	56114169	G	A
1	ZNF524	19	56113904	C	T
1	ZNF524	19	56113724	C	T
1	ZNF521	18	22807394	C	T	x
1	ZNF521	18	22806860	C	T	x
1	ZNF521	18	22806669	A	G	x
1	ZNF519	18	14105285	G	A
1	ZNF519	18	14104947	A	C
1	ZNF519	18	14104924	T	C
1	ZNF518B	4	10445663	C	T
1	ZNF518A	10	97919985	G	T
1	ZNF518A	10	97919977	A	G
1	ZNF518A	10	97918734	C	T
1	ZNF517	8	146033152	C	T
1	ZNF516	18	74153347	C	T
1	ZNF516	18	74090924	C	T
1	ZNF514	2	95815252	G	T
1	ZNF513	2	27600621	G	A
1	ZNF512B	20	62597521	G	T
1	ZNF512B	20	62596003	G	A
1	ZNF512B	20	62594765	C	T
1	ZNF512B	20	62594755	C	A
1	ZNF512	2	27840377	G	A
1	ZNF512	2	27806581	G	T
1	ZNF507	19	32873408	C	A
1	ZNF506	19	19905493	T	C
1	ZNF502	3	44763497	A	G
1	ZNF502	3	44763440	A	C
1	ZNF502	3	44762366	C	T
1	ZNF501	3	44776042	T	C
1	ZNF500	16	4810512	G	A
1	ZNF498	7	99227177	T	C
1	ZNF498	7	99217336	C	A
1	ZNF497	19	58867604	G	A
1	ZNF496	1	247463868	G	A
1	ZNF493	19	21606029	T	A
1	ZNF492	19	22847420	G	A
1	ZNF490	19	12692226	G	T
1	ZNF490	19	12691933	G	A
1	ZNF485	10	44104066	C	T
1	ZNF484	9	95609315	C	T
1	ZNF484	9	95609055	C	T
1	ZNF483	9	114303977	G	T
1	ZNF483	9	114303976	G	T
1	ZNF480	19	52825478	T	C
1	ZNF480	19	52825203	A	T
1	ZNF48	16	30410346	G	T
1	ZNF48	16	30410303	A	G
1	ZNF48	16	30409891	G	A
1	ZNF48	16	30409797	G	C
1	ZNF48	16	30409519	C	T
1	ZNF479	7	57188503	G	A
1	ZNF474	5	121488744	C	T
1	ZNF474	5	121488202	C	T
1	ZNF473	19	50550236	C	T
1	ZNF473	19	50548807	C	T
1	ZNF471	19	57036228	T	C
1	ZNF471	19	57036063	T	C
1	ZNF470	19	57089372	G	A
1	ZNF470	19	57089329	G	A
1	ZNF470	19	57085838	A	C
1	ZNF469	16	88505323	G	A
1	ZNF469	16	88501876	T	C
1	ZNF469	16	88501739	G	A
1	ZNF469	16	88500599	A	G
1	ZNF469	16	88498399	A	G
1	ZNF469	16	88497319	C	T
1	ZNF469	16	88496039	A	G
1	ZNF469	16	88495645	C	T
1	ZNF469	16	88494340	G	T
1	ZNF467	7	149462726	G	T
1	ZNF462	9	109691437	G	A
1	ZNF462	9	109686975	A	G
1	ZNF462	9	109686580	G	T
1	ZNF461	19	37130916	A	G
1	ZNF461	19	37130886	C	T
1	ZNF460	19	57803253	T	C
1	ZNF451	6	57013236	C	G
1	ZNF449	X	134494916	A	T
1	ZNF449	X	134494612	C	T
1	ZNF445	3	44489509	G	A
1	ZNF445	3	44488458	C	A
1	ZNF442	19	12461386	C	T
1	ZNF440	19	11943277	G	A
1	ZNF44	19	12384483	G	T
1	ZNF44	19	12383272	G	T
1	ZNF436	1	23689023	G	A
1	ZNF436	1	23688918	G	A
1	ZNF436	1	23688864	G	A
1	ZNF433	19	12127467	C	T
1	ZNF433	19	12126305	A	G
1	ZNF431	19	21366721	C	T
1	ZNF431	19	21365831	A	C
1	ZNF43	19	21991940	T	G
1	ZNF43	19	21991553	T	C
1	ZNF43	19	21990700	T	C
1	ZNF425	7	148801987	C	T
1	ZNF425	7	148801849	C	A
1	ZNF425	7	148801757	G	A
1	ZNF423	16	49670533	C	T
1	ZNF423	16	49559281	A	G
1	ZNF420	19	37619266	G	A
1	ZNF418	19	58439241	G	A
1	ZNF417	19	58420062	G	T
1	ZNF415	19	53625659	C	T
1	ZNF415	19	53612548	G	T
1	ZNF415	19	53611895	T	C
1	ZNF407	18	72776281	G	A
1	ZNF407	18	72347537	T	C
1	ZNF407	18	72345407	T	C
1	ZNF407	18	72344156	A	T
1	ZNF404	19	44378170	T	C
1	ZNF398	7	148876486	G	A
1	ZNF398	7	148876410	T	G
1	ZNF398	7	148876359	C	T
1	ZNF397	18	32826007	A	G
1	ZNF397	18	32823133	G	T
1	ZNF395	8	28207652	G	T
1	ZNF389	6	28134849	C	T
1	ZNF385B	2	180311290	G	A
1	ZNF385A	12	54764797	C	T
1	ZNF383	19	37734427	C	T
1	ZNF382	19	37118026	G	A
1	ZNF382	19	37100841	T	C
1	ZNF37A	10	38406964	G	T
1	ZNF37A	10	38406518	G	T
1	ZNF367	9	99154788	C	T
1	ZNF367	9	99150719	G	A
1	ZNF366	5	71752281	G	T
1	ZNF365	10	64415380	T	C
1	ZNF365	10	64159370	A	G
1	ZNF362	1	33742090	G	A
1	ZNF358	19	7585160	G	A
1	ZNF358	19	7584778	G	A
1	ZNF354C	5	178506990	G	A
1	ZNF354C	5	178506644	G	A
1	ZNF354C	5	178506341	G	T
1	ZNF354C	5	178503482	A	G
1	ZNF354B	5	178310042	C	T
1	ZNF350	19	52468320	T	C
1	ZNF35	3	44701358	C	A
1	ZNF35	3	44700479	C	T
1	ZNF347	19	53652530	C	T
1	ZNF347	19	53645789	T	C
1	ZNF347	19	53645415	T	C
1	ZNF347	19	53644893	A	G
1	ZNF347	19	53643937	C	A
1	ZNF345	19	37368836	A	G
1	ZNF345	19	37368307	A	G
1	ZNF343	20	2463924	T	A
1	ZNF34	8	145999854	C	T
1	ZNF34	8	145999003	T	G
1	ZNF33B	10	43089285	G	A
1	ZNF33B	10	43088631	G	A
1	ZNF33A	10	38344954	G	T
1	ZNF33A	10	38344296	G	A
1	ZNF33A	10	38344069	G	A
1	ZNF335	20	44596394	G	A
1	ZNF335	20	44592242	C	T
1	ZNF335	20	44590808	T	C
1	ZNF335	20	44590744	G	A
1	ZNF335	20	44588895	T	C
1	ZNF335	20	44580860	G	A
1	ZNF334	20	45132889	A	G
1	ZNF334	20	45131339	T	C
1	ZNF334	20	45131189	T	G
1	ZNF333	19	14815961	G	A
1	ZNF333	19	14805935	G	A
1	ZNF326	1	90475760	G	A
1	ZNF324B	19	58967697	C	T
1	ZNF324B	19	58967409	G	A
1	ZNF324B	19	58967188	G	T
1	ZNF324B	19	58966971	G	T
1	ZNF324	19	58983245	C	T
1	ZNF322B	9	99961072	C	T
1	ZNF322A	6	26638081	G	A
1	ZNF322A	6	26637614	G	A
1	ZNF320	19	53384964	G	A
1	ZNF320	19	53384551	A	G
1	ZNF32	10	44139640	T	C
1	ZNF319	16	58031092	G	A
1	ZNF318	6	43325247	G	A
1	ZNF318	6	43323767	C	A
1	ZNF317	19	9272026	G	A
1	ZNF317	19	9271471	C	A
1	ZNF311	6	28967313	A	T
1	ZNF311	6	28963337	C	T
1	ZNF311	6	28963214	G	A
1	ZNF304	19	57867708	C	T
1	ZNF302	19	35175301	A	G
1	ZNF300	5	150276032	T	G
1	ZNF300	5	150275832	T	C
1	ZNF300	5	150275238	A	C
1	ZNF30	19	35435442	C	T
1	ZNF30	19	35434616	G	A
1	ZNF30	19	35434407	A	G
1	ZNF3	7	99669271	G	A
1	ZNF296	19	45575052	C	T
1	ZNF295	21	43412922	C	T
1	ZNF295	21	43412823	G	A
1	ZNF295	21	43411630	C	G
1	ZNF292	6	87969555	A	G
1	ZNF292	6	87969073	G	A
1	ZNF292	6	87968975	A	G
1	ZNF292	6	87968118	A	G
1	ZNF292	6	87967373	A	G
1	ZNF292	6	87966575	G	A
1	ZNF292	6	87925704	T	C
1	ZNF287	17	16456321	T	C
1	ZNF286A	17	15620432	C	T
1	ZNF285	19	44891369	G	A
1	ZNF284	19	44590235	C	T
1	ZNF283	19	44352154	C	A
1	ZNF283	19	44351927	C	T
1	ZNF282	7	148921305	G	A
1	ZNF281	1	200377449	A	G
1	ZNF280D	15	56961070	C	T
1	ZNF280C	X	129354345	T	C
1	ZNF28	19	53303235	C	T
1	ZNF276	16	89789789	C	T
1	ZNF275	X	152612788	G	A
1	ZNF275	X	152612645	G	A
1	ZNF273	7	64388545	A	G
1	ZNF273	7	64388378	T	A
1	ZNF273	7	64388165	G	A
1	ZNF268	12	133758604	A	T
1	ZNF267	16	31927754	G	C
1	ZNF267	16	31927430	T	C
1	ZNF267	16	31927263	C	T
1	ZNF266	19	9524638	C	A
1	ZNF266	19	9524169	A	G
1	ZNF264	19	57724206	A	G
1	ZNF264	19	57723847	G	T
1	ZNF264	19	57723720	C	T
1	ZNF264	19	57705291	T	C
1	ZNF263	16	3339866	C	T
1	ZNF254	19	24310587	T	C
1	ZNF254	19	24288790	T	C
1	ZNF253	19	20002642	G	A
1	ZNF250	8	146115403	C	A
1	ZNF250	8	146107168	A	C
1	ZNF25	10	38241234	A	G
1	ZNF239	10	44052678	C	T
1	ZNF239	10	44052486	T	C
1	ZNF238	1	244218190	C	A
1	ZNF236	18	74659578	G	A
1	ZNF236	18	74649192	T	A
1	ZNF236	18	74639265	G	A
1	ZNF236	18	74611002	G	A
1	ZNF236	18	74607158	G	A
1	ZNF236	18	74606978	G	A
1	ZNF235	19	44791382	C	A
1	ZNF234	19	44661447	A	C
1	ZNF233	19	44777940	G	T
1	ZNF232	17	5009619	A	G
1	ZNF230	19	44515394	T	C
1	ZNF23	16	71482535	G	A
1	ZNF229	19	44933923	C	T
1	ZNF227	19	44739214	T	A
1	ZNF226	19	44681237	A	G
1	ZNF225	19	44636045	G	A
1	ZNF225	19	44635222	C	T
1	ZNF223	19	44570655	T	C
1	ZNF223	19	44570419	A	G
1	ZNF222	19	44536949	C	T
1	ZNF221	19	44470218	T	C
1	ZNF219	14	21561262	C	T
1	ZNF219	14	21560995	C	T
1	ZNF217	20	52198619	C	T
1	ZNF215	11	6977080	C	A
1	ZNF208	19	22154587	T	C
1	ZNF205	16	3169917	C	T
1	ZNF205	16	3169265	G	A
1	ZNF202	11	123600364	C	T
1	ZNF202	11	123596748	T	C
1	ZNF20	19	12244467	T	G
1	ZNF20	19	12244029	T	C
1	ZNF20	19	12244028	G	A
1	ZNF2	2	95847480	C	T
1	ZNF2	2	95847048	C	T
1	ZNF2	2	95847045	C	T
1	ZNF197	3	44684748	G	A
1	ZNF195	11	3381591	A	G
1	ZNF192	6	28116337	G	A
1	ZNF187	6	28244375	T	C
1	ZNF185	X	152083705	G	A
1	ZNF184	6	27420902	A	T
1	ZNF184	6	27419100	T	C
1	ZNF180	19	44983614	A	G
1	ZNF180	19	44983525	C	T
1	ZNF180	19	44983503	A	T
1	ZNF174	16	3458384	A	C
1	ZNF17	19	57929300	C	T
1	ZNF169	9	97063233	C	T
1	ZNF169	9	97062606	C	T
1	ZNF167	3	44624479	C	T
1	ZNF167	3	44612446	C	A
1	ZNF167	3	44611554	A	G
1	ZNF160	19	53577495	T	A
1	ZNF160	19	53572900	A	G
1	ZNF16	8	146156248	G	A
1	ZNF157	X	47269715	G	A
1	ZNF143	11	9530310	C	T
1	ZNF143	11	9516259	C	T
1	ZNF142	2	219508143	T	C
1	ZNF142	2	219507438	G	T
1	ZNF142	2	219506957	A	G
1	ZNF141	4	367013	G	A
1	ZNF140	12	133682634	C	A
1	ZNF135	19	58579729	G	T
1	ZNF135	19	58579632	A	C
1	ZNF135	19	58578830	C	T
1	ZNF133	20	18296028	G	T
1	ZNF131	5	43161971	A	G
1	ZNF131	5	43139351	A	G
1	ZNF124	1	247319927	G	T
1	ZNF121	19	9676915	C	G
1	ZNF101	19	19790288	A	T
1	ZNF100	19	21909943	G	A
1	ZNF100	19	21909877	A	G
1	ZNF100	19	21909631	T	A
1	ZNF10	12	133732423	T	C
1	ZNF10	12	133727692	G	A
1	ZMYND8	20	45867672	G	A
1	ZMYND8	20	45867655	C	T
1	ZMYND8	20	45865135	C	T
1	ZMYND8	20	45865100	G	A
1	ZMYND8	20	45839533	C	T
1	ZMYND19	9	140482265	T	C
1	ZMYND19	9	140482228	G	T
1	ZMYND15	17	4645349	G	T
1	ZMYND10	3	50380357	C	T
1	ZMYND10	3	50378878	G	T
1	ZMYM6	1	35474490	G	A
1	ZMYM6	1	35452924	T	C
1	ZMYM4	1	35851753	G	A
1	ZMYM4	1	35836209	A	C
1	ZMYM4	1	35836029	A	C
1	ZMYM3	X	70469311	C	T
1	ZMYM3	X	70467329	C	A
1	ZMYM3	X	70467288	G	A
1	ZMYM2	13	20656240	C	T
1	ZMYM1	1	35569942	A	T
1	ZMIZ2	7	44797627	C	T
1	ZMIZ2	7	44796625	C	T
1	ZMIZ1	10	81067290	G	A
1	ZMIZ1	10	81063806	G	A
1	ZMIZ1	10	81061903	G	A
1	ZMIZ1	10	81061881	G	A
1	ZMIZ1	10	81060584	C	T
1	ZMIZ1	10	81050899	C	T
1	ZMIZ1	10	80976020	C	T
1	ZMIZ1	10	80961429	C	T
1	ZMAT4	8	40683111	G	A
1	ZMAT4	8	40532314	T	C
1	ZMAT3	3	178748762	C	T
1	ZMAT2	5	140081659	A	G
1	ZMAT1	X	101139636	A	T
1	ZMAT1	X	101139020	T	C
1	ZKSCAN5	7	99123844	G	A
1	ZKSCAN5	7	99123690	G	A
1	ZKSCAN4	6	28213381	A	G
1	ZKSCAN3	6	28333875	C	T
1	ZKSCAN2	16	25258231	G	A
1	ZKSCAN2	16	25255541	G	A
1	ZKSCAN2	16	25251180	T	A
1	ZKSCAN1	7	99627568	A	G
1	ZIM3	19	57646313	C	T
1	ZIC5	13	100623765	G	A
1	ZIC5	13	100623663	A	T
1	ZIC4	3	147114178	G	T
1	ZIC4	3	147113652	T	C
1	ZIC3	X	136649749	A	G
1	ZIC2	13	100637613	C	A
1	ZIC2	13	100634759	C	T
1	ZIC1	3	147127903	C	T
1	ZHX3	20	39832810	G	T
1	ZHX2	8	123965718	G	T
1	ZHX1	8	124266078	G	A
1	ZHX1	8	124265936	G	A
1	ZHX1	8	124265606	G	A
1	ZGPAT	20	62366664	G	T
1	ZFYVE9	1	52705164	T	C
1	ZFYVE9	1	52704711	T	C
1	ZFYVE28	4	2306083	C	T
1	ZFYVE27	10	99504577	C	T
1	ZFYVE26	14	68275984	C	T
1	ZFYVE26	14	68273274	G	A
1	ZFYVE26	14	68256055	G	A
1	ZFYVE26	14	68244314	G	A
1	ZFYVE21	14	104195470	T	C
1	ZFYVE19	15	41102949	G	T
1	ZFYVE16	5	79745501	T	C
1	ZFYVE1	14	73464775	C	T
1	ZFYVE1	14	73442294	C	T
1	ZFR2	19	3831728	G	A
1	ZFR2	19	3821392	C	T
1	ZFR2	19	3811363	A	G
1	ZFR	5	32390438	G	A
1	ZFPM2	8	106814872	C	T
1	ZFPM2	8	106814659	C	T
1	ZFPL1	11	64855448	G	A
1	ZFPL1	11	64854868	C	T
1	ZFPL1	11	64853952	G	A
1	ZFPL1	11	64852592	C	T
1	ZFP92	X	152686464	G	A
1	ZFP92	X	152686264	G	T
1	ZFP90	16	68597759	G	A
1	ZFP90	16	68597750	A	G
1	ZFP82	19	36884696	G	A
1	ZFP82	19	36884036	G	T
1	ZFP64	20	50769402	G	A
1	ZFP64	20	50769324	C	T
1	ZFP64	20	50705057	C	T
1	ZFP62	5	180276425	G	A
1	ZFP57	6	29644719	A	G
1	ZFP42	4	188924486	G	A
1	ZFP42	4	188923970	G	A
1	ZFP41	8	144332209	G	A
1	ZFP37	9	115805267	G	A
1	ZFP36L1	14	69257098	G	T
1	ZFP3	17	4996262	G	A
1	ZFP3	17	4996031	A	G
1	ZFP28	19	57065664	C	T
1	ZFP161	18	5292058	T	C
1	ZFP112	19	44833740	A	G
1	ZFP106	15	42743181	T	C
1	ZFP106	15	42742683	T	C
1	ZFP1	16	75203656	A	G
1	ZFP1	16	75203155	G	A
1	ZFHX4	8	77776084	A	C
1	ZFHX4	8	77764645	G	A
1	ZFHX4	8	77764339	G	A
1	ZFHX4	8	77618199	A	C
1	ZFHX4	8	77617952	G	A
1	ZFHX4	8	77617891	C	T
1	ZFHX4	8	77617381	T	G
1	ZFHX4	8	77617280	C	T
1	ZFHX4	8	77616982	T	A
1	ZFHX3	16	72993829	G	A
1	ZFHX3	16	72993514	C	T
1	ZFHX3	16	72993336	G	A
1	ZFHX3	16	72984485	G	T
1	ZFHX3	16	72845624	C	T
1	ZFHX3	16	72830002	G	A
1	ZFHX3	16	72828961	C	T
1	ZFHX3	16	72828950	T	C
1	ZFHX3	16	72822200	G	A
1	ZFHX3	16	72822164	G	A
1	ZFHX3	16	72821310	G	A
1	ZFC3H1	12	72057088	G	A
1	ZFC3H1	12	72032249	C	T
1	ZFC3H1	12	72026210	G	A
1	ZFAT	8	135614132	A	C
1	ZFAT	8	135600629	A	G
1	ZFAT	8	135524821	C	T
1	ZFAND5	9	74975566	A	G
1	ZFAND2B	2	220072118	A	G
1	ZFAND2B	2	220071739	T	G
1	ZFAND1	8	82615359	T	A
1	ZER1	9	131503927	G	A
1	ZER1	9	131497633	T	C
1	ZER1	9	131495769	T	C
1	ZEB2	2	145187548	T	A
1	ZDHHC8	22	20130734	C	T
1	ZDHHC8	22	20130587	C	A
1	ZDHHC7	16	85010119	C	T
1	ZDHHC5	11	57460087	C	T
1	ZDHHC24	11	66307190	A	C
1	ZDHHC24	11	66307020	C	T
1	ZDHHC2	8	17014309	T	A
1	ZDHHC19	3	195934301	C	T
1	ZDHHC18	1	27180228	G	A
1	ZDHHC17	12	77216200	T	C
1	ZDHHC17	12	77208971	G	A
1	ZDHHC13	11	19174228	C	T
1	ZDBF2	2	207175449	T	C
1	ZDBF2	2	207174881	A	G
1	ZDBF2	2	207174626	G	A
1	ZDBF2	2	207174181	T	C
1	ZCWPW1	7	100014729	C	A
1	ZCCHC7	9	37327803	C	T
1	ZCCHC6	9	88968088	G	A
1	ZCCHC6	9	88967657	C	A
1	ZCCHC6	9	88961241	C	T
1	ZCCHC2	18	60242363	C	T
1	ZCCHC16	X	111698198	A	G
1	ZCCHC14	16	87454273	A	G
1	ZCCHC14	16	87454239	G	T
1	ZCCHC14	16	87448068	T	G
1	ZCCHC14	16	87445734	C	T
1	ZCCHC14	16	87445387	G	A
1	ZCCHC12	X	117959460	C	T
1	ZCCHC12	X	117959232	G	A
1	ZCCHC11	1	52937665	C	T
1	ZCCHC11	1	52891111	C	T
1	ZCCHC10	5	132342458	G	A
1	ZC3HAV1	7	138764981	A	G
1	ZC3HAV1	7	138764547	C	T
1	ZC3HAV1	7	138764537	C	T
1	ZC3H7B	22	41752059	G	A
1	ZC3H7B	22	41747598	A	G
1	ZC3H7A	16	11870323	C	T
1	ZC3H7A	16	11857435	A	G
1	ZC3H6	2	113089462	A	G
1	ZC3H6	2	113080293	G	T
1	ZC3H4	19	47575245	C	G
1	ZC3H4	19	47575243	T	A
1	ZC3H4	19	47570092	C	T
1	ZC3H3	8	144621451	G	A
1	ZC3H3	8	144621255	C	T
1	ZC3H3	8	144618586	C	T
1	ZC3H3	8	144589940	C	T
1	ZC3H18	16	88697625	G	A
1	ZC3H15	2	187368825	G	T
1	ZC3H14	14	89061244	A	G
1	ZC3H13	13	46619132	C	T
1	ZC3H13	13	46543235	A	G
1	ZC3H13	13	46543149	T	C
1	ZC3H12C	11	110036166	G	A
1	ZC3H12C	11	110035102	A	G
1	ZC3H10	12	56515522	T	C
1	ZBTB9	6	33423004	C	T
1	ZBTB8OS	1	33099638	A	G
1	ZBTB8OS	1	33087491	G	A
1	ZBTB7C	18	45556140	C	T
1	ZBTB7C	18	45555864	T	C
1	ZBTB7B	1	154987735	G	A
1	ZBTB7B	1	154987560	C	T
1	ZBTB7B	1	154987255	C	T
1	ZBTB7B	1	154987218	C	T
1	ZBTB7A	19	4054337	C	T
1	ZBTB5	9	37442408	C	T
1	ZBTB5	9	37441083	G	A
1	ZBTB49	4	4322787	A	G
1	ZBTB48	1	6649030	C	T
1	ZBTB48	1	6642261	T	C
1	ZBTB47	3	42701001	C	T
1	ZBTB47	3	42700657	C	T
1	ZBTB47	3	42700439	G	A
1	ZBTB47	3	42700093	C	T
1	ZBTB46	20	62407209	A	G
1	ZBTB46	20	62384196	A	G
1	ZBTB45	19	59028729	C	T
1	ZBTB45	19	59027936	C	T
1	ZBTB44	11	130131498	T	G
1	ZBTB43	9	129595536	C	T
1	ZBTB42	14	105268333	A	G
1	ZBTB42	14	105267692	A	G
1	ZBTB40	1	22834536	G	A
1	ZBTB40	1	22816931	G	C
1	ZBTB4	17	7366877	G	A
1	ZBTB4	17	7365528	C	T
1	ZBTB38	3	141162915	C	T
1	ZBTB38	3	141161826	C	T
1	ZBTB37	1	173855016	G	A
1	ZBTB37	1	173840181	C	T
1	ZBTB37	1	173840044	G	A
1	ZBTB34	9	129642787	A	G
1	ZBTB34	9	129641876	G	A
1	ZBTB33	X	119388916	G	T
1	ZBTB32	19	36206013	A	C
1	ZBTB3	11	62521137	A	G
1	ZBTB3	11	62520065	C	T
1	ZBTB3	11	62519768	G	A
1	ZBTB25	14	64954065	C	T
1	ZBTB22	6	33284349	G	A
1	ZBTB20	3	114099066	T	C
1	ZBTB20	3	114069827	G	A
1	ZBTB20	3	114069732	G	A
1	ZBTB20	3	114069334	G	A
1	ZBTB17	1	16271206	A	G
1	ZBTB17	1	16271011	C	T
1	ZBTB17	1	16269670	A	G
1	ZBTB17	1	16268912	A	G
1	ZBTB16	11	113934102	T	C
1	ZBTB11	3	101390913	G	A
1	ZBTB11	3	101378774	C	T
1	ZBED4	22	50279166	C	T
1	ZAR1L	13	32885425	C	T
1	ZAP70	2	98353966	G	A
1	ZAP70	2	98351159	G	A
1	ZAP70	2	98340827	C	A
1	ZAN	7	100392938	C	T
1	ZAN	7	100371076	G	A
1	ZAN	7	100361786	G	A
1	ZAN	7	100361491	C	T
1	ZAN	7	100355965	C	T
1	ZAN	7	100350204	A	C
1	ZAK	2	174103117	T	C
1	ZAK	2	174074541	C	A
1	ZADH2	18	72920873	C	A
1	ZADH2	18	72914248	T	C
1	ZADH2	18	72913731	G	A
1	ZACN	17	74075603	C	T
1	YY2	X	21874899	C	T
1	YY2	X	21874668	C	T
1	YWHAZ	8	101932935	C	T
1	YWHAB	20	43530340	G	C
1	YTHDF3	8	64098923	T	C
1	YTHDF3	8	64098763	T	C
1	YTHDF2	1	29070269	A	G
1	YTHDC2	5	112901621	A	C
1	YTHDC2	5	112868694	G	A
1	YTHDC2	5	112851058	G	A
1	YTHDC1	4	69204011	A	G
1	YTHDC1	4	69203342	C	T
1	YSK4	2	135743426	A	G
1	YSK4	2	135722473	G	A
1	YPEL5	2	30379582	C	T
1	YME1L1	10	27423033	C	T
1	YME1L1	10	27412559	T	G
1	YME1L1	10	27405272	C	T
1	YME1L1	10	27405164	G	A
1	YLPM1	14	75302033	C	T
1	YLPM1	14	75283356	A	G
1	YLPM1	14	75248214	A	G
1	YLPM1	14	75245252	A	G
1	YLPM1	14	75230354	C	T
1	YJEFN3	19	19648326	C	T
1	YJEFN3	19	19640267	T	G
1	YIPF5	5	143549437	T	C
1	YIPF3	6	43481130	T	C
1	YIPF2	19	11039077	C	T
1	YEATS2	3	183508751	G	T
1	YEATS2	3	183504057	G	A
1	YEATS2	3	183479354	G	T
1	YEATS2	3	183469940	A	G
1	YBX2	17	7193324	G	A
1	YBX2	17	7192891	G	A
1	YBX1	1	43162317	C	T
1	YBEY	21	47716126	G	A
1	YARS	1	33272207	T	C
1	YARS	1	33245061	G	A
1	XYLT2	17	48432307	C	T
1	XYLT1	16	17252700	G	A
1	XYLT1	16	17232306	C	T
1	XYLB	3	38438608	G	A
1	XRN2	20	21314797	A	G
1	XRN2	20	21313043	G	A
1	XRN2	20	21311157	G	A
1	XRCC6	22	42032574	G	A
1	XRCC5	2	216981497	T	C
1	XRCC1	19	44056368	C	G
1	XRCC1	19	44055777	C	T
1	XRCC1	19	44055750	C	T
1	XPOT	12	64812781	G	T
1	XPO6	16	28187250	A	G
1	XPO6	16	28167687	A	T
1	XPO6	16	28112929	C	T
1	XPO4	13	21383342	C	T
1	XPO4	13	21382633	A	G
1	XPO4	13	21374446	T	C
1	XPO4	13	21373384	G	A
1	XPO4	13	21364662	G	A
1	XPNPEP3	22	41265023	C	T
1	XPC	3	14201304	C	T	x
1	XPA	9	100437827	G	A	x
1	XKR9	8	71619326	G	A
1	XKR9	8	71619176	T	C
1	XKR7	20	30584730	T	C
1	XKR7	20	30556243	T	C
1	XKR6	8	10756069	T	C
1	XKR6	8	10755681	C	G
1	XKR5	8	6679424	G	A
1	XKR4	8	56436530	G	T
1	XKR4	8	56436458	C	G
1	XKR4	8	56436244	T	G
1	XKR4	8	56435889	C	T
1	XIRP2	2	168114592	A	G
1	XIRP2	2	168114578	G	T
1	XIRP2	2	168108140	G	T
1	XIRP2	2	168108039	A	G
1	XIRP2	2	168105951	T	C
1	XIRP2	2	168105487	G	T
1	XIRP2	2	167760215	C	T
1	XIRP1	3	39229143	G	A
1	XIRP1	3	39227107	T	G
1	XIRP1	3	39226903	G	T
1	XDH	2	31560571	C	T
1	XCR1	3	46063060	C	T
1	XAB2	19	7688144	G	A
1	XAB2	19	7687236	T	C
1	WWP2	16	69967995	T	A
1	WWP1	8	87470210	C	T
1	WWP1	8	87460640	T	C
1	WWP1	8	87440032	C	T
1	WWOX	16	79245615	G	T
1	WWC3	X	10106971	C	T
1	WWC3	X	10102556	G	T
1	WWC2	4	184166617	A	G
1	WWC2	4	184114755	A	G
1	WTAP	6	160176604	C	T
1	WTAP	6	160176236	C	T
1	WT1	11	32449532	T	C	x
1	WSCD2	12	108634156	C	T
1	WSCD2	12	108603960	C	T
1	WSCD1	17	6023634	C	A
1	WSB1	17	25639288	C	A
1	WRNIP1	6	2785304	G	A
1	WRNIP1	6	2770515	G	A
1	WRNIP1	6	2770509	G	A
1	WRNIP1	6	2769082	T	A
1	WRN	8	31024589	C	T	x
1	WRN	8	31014948	T	C	x
1	WRN	8	31012216	T	G	x
1	WRN	8	30999036	C	T	x
1	WRAP53	17	7604777	C	T
1	WRAP53	17	7592939	A	G
1	WRAP53	17	7592565	A	G
1	WRAP53	17	7592069	A	G
1	WNT9B	17	44953674	C	T
1	WNT8B	10	102239712	C	T
1	WNT8A	5	137419803	G	A
1	WNT7B	22	46327021	G	A
1	WNT7B	22	46318772	G	T
1	WNT7A	3	13860617	G	A
1	WNT6	2	219738506	G	T
1	WNT5B	12	1755309	A	G
1	WNT5B	12	1740549	C	T
1	WNT5A	3	55508581	C	A
1	WNT5A	3	55504385	G	A
1	WNT4	1	22446702	C	T
1	WNT4	1	22446645	C	T
1	WNT2B	1	113059860	C	T
1	WNT2B	1	113058767	C	T
1	WNT2B	1	113057604	C	T
1	WNT2	7	116918333	C	T
1	WNT2	7	116918279	T	C
1	WNT16	7	120979016	A	G
1	WNT10B	12	49364268	C	T
1	WNK4	17	40937185	G	A
1	WNK4	17	40934840	T	C
1	WNK3	X	54265463	C	T
1	WNK2	9	96060183	C	T
1	WNK2	9	96055191	G	A
1	WNK2	9	96021703	C	T
1	WNK2	9	96019390	C	T
1	WNK2	9	96002090	C	T
1	WNK2	9	95992004	G	A
1	WNK1	12	970202	A	G
1	WNK1	12	968464	T	C
1	WNK1	12	939173	C	A
1	WNK1	12	862814	G	A
1	WNK1	12	1005808	A	C
1	WNK1	12	1005732	T	C
1	WIZ	19	15547905	G	A
1	WIZ	19	15535779	G	A
1	WISP3	6	112390696	T	C
1	WISP1	8	134225294	A	G
1	WIPI2	7	5267813	C	T
1	WIPI2	7	5267791	A	G
1	WIPI2	7	5262291	G	T
1	WIPI2	7	5254170	T	C
1	WIPF2	17	38434439	G	A
1	WIPF2	17	38421186	C	T
1	WIPF2	17	38420929	T	C
1	WIPF1	2	175436507	A	C
1	WIBG	12	56295763	G	A
1	WHSC2	4	1989708	G	A
1	WHSC2	4	1985408	G	A
1	WHSC1L1	8	38205662	C	A	x
1	WHSC1L1	8	38187060	C	T	x
1	WHSC1L1	8	38175499	G	A	x
1	WHSC1L1	8	38162195	A	T	x
1	WHSC1L1	8	38133261	G	A	x
1	WHSC1	4	1980614	G	A	x
1	WHSC1	4	1978207	G	A	x
1	WHSC1	4	1918614	A	G	x
1	WHSC1	4	1902634	C	T	x
1	WFIKKN2	17	48918090	G	A
1	WFIKKN1	16	683572	G	A
1	WFIKKN1	16	682737	C	T
1	WFDC3	20	44404238	C	T
1	WEE2	7	141424004	G	A
1	WEE2	7	141416025	G	A
1	WEE1	11	9598709	T	C
1	WDSUB1	2	160139518	G	T
1	WDSUB1	2	160139368	C	T
1	WDSUB1	2	160139260	T	C
1	WDSUB1	2	160112766	A	C
1	WDR96	10	105974173	G	A
1	WDR96	10	105945810	G	T
1	WDR96	10	105912416	A	G
1	WDR96	10	105893385	C	T
1	WDR93	15	90286572	C	T
1	WDR93	15	90270441	G	A
1	WDR91	7	134889048	G	A
1	WDR90	16	716348	G	T
1	WDR90	16	716253	T	C
1	WDR90	16	709105	G	C
1	WDR90	16	705646	C	T
1	WDR90	16	703434	C	A
1	WDR89	14	64066283	A	G
1	WDR88	19	33666364	C	T
1	WDR88	19	33642108	C	T
1	WDR87	19	38385623	G	A
1	WDR87	19	38383937	G	T
1	WDR87	19	38376375	C	T
1	WDR86	7	151093049	A	C
1	WDR81	17	1637275	G	A
1	WDR81	17	1634442	T	C
1	WDR81	17	1634204	C	A
1	WDR81	17	1634102	G	A
1	WDR8	1	3553638	C	T
1	WDR78	1	67313231	C	T
1	WDR78	1	67288065	A	G
1	WDR77	1	111991420	G	A
1	WDR77	1	111989734	A	G
1	WDR77	1	111983914	C	T
1	WDR76	15	44149290	T	C
1	WDR75	2	190327257	C	T
1	WDR70	5	37727016	C	T
1	WDR70	5	37721245	A	C
1	WDR7	18	54423842	C	T
1	WDR67	8	124140545	C	A
1	WDR67	8	124138890	C	T
1	WDR66	12	122439404	T	C
1	WDR66	12	122361712	G	A
1	WDR65	1	43665075	T	C
1	WDR64	1	241958535	C	T
1	WDR64	1	241907806	G	T
1	WDR62	19	36595814	G	T
1	WDR61	15	78585094	C	A
1	WDR61	15	78585011	C	T
1	WDR60	7	158738301	C	A
1	WDR60	7	158726835	T	C
1	WDR60	7	158723146	G	A
1	WDR60	7	158715091	A	G
1	WDR6	3	49052141	G	A
1	WDR6	3	49051435	G	A
1	WDR6	3	49051354	C	A
1	WDR6	3	49049180	G	A
1	WDR59	16	74999682	T	C
1	WDR59	16	74919641	C	T
1	WDR55	5	140049232	G	A
1	WDR55	5	140048951	C	T
1	WDR54	2	74651060	G	A
1	WDR54	2	74650640	G	T
1	WDR53	3	196288346	T	C
1	WDR52	3	113022877	G	A
1	WDR47	1	109525910	C	T
1	WDR46	6	33255203	G	T
1	WDR46	6	33247378	G	T
1	WDR46	6	33247084	C	T
1	WDR45L	17	80576949	C	T
1	WDR45	X	48935336	G	A
1	WDR45	X	48934160	C	T
1	WDR45	X	48933235	G	A
1	WDR45	X	48933107	T	A
1	WDR44	X	117527130	A	T
1	WDR44	X	117526780	A	G
1	WDR44	X	117480490	G	T
1	WDR4	21	44282469	G	A
1	WDR38	9	127618759	C	A
1	WDR37	10	1175200	C	T
1	WDR35	2	20180483	G	A
1	WDR35	2	20145582	T	A
1	WDR35	2	20137642	C	T
1	WDR35	2	20133187	A	G
1	WDR34	9	131397186	C	T
1	WDR33	2	128522395	T	C
1	WDR33	2	128481981	G	A
1	WDR33	2	128477747	C	T
1	WDR33	2	128477616	C	T
1	WDR33	2	128466417	A	G
1	WDR27	6	170038742	C	T
1	WDR27	6	170034575	T	C
1	WDR27	6	170002363	A	G
1	WDR26	1	224612238	C	T
1	WDR25	14	100996301	G	A
1	WDR25	14	100847815	A	G
1	WDR24	16	737099	T	C
1	WDR24	16	735431	C	T
1	WDR19	4	39226559	G	A
1	WDR19	4	39217809	T	C
1	WDR18	19	994328	G	A
1	WDR18	19	992058	C	T
1	WDR18	19	990256	G	A
1	WDR17	4	177061071	C	T
1	WDR17	4	177049894	C	A
1	WDR16	17	9501643	G	A
1	WDR16	17	9501569	G	A
1	WDR13	X	48458808	G	A
1	WDR13	X	48458774	C	T
1	WDR11	10	122630757	C	T
1	WDR11	10	122618210	G	A
1	WDR1	4	10105577	C	T
1	WDR1	4	10079432	G	A
1	WDPCP	2	63664643	T	C
1	WDFY4	10	50178289	G	A
1	WDFY4	10	50177157	G	A
1	WDFY4	10	50109887	C	T
1	WDFY4	10	50004406	C	A
1	WDFY4	10	49939509	G	T
1	WDFY4	10	49939458	C	A
1	WDFY3	4	85731159	C	T
1	WDFY3	4	85724466	C	T
1	WDFY3	4	85654762	G	A
1	WDFY3	4	85623634	C	T
1	WDFY3	4	85611738	G	A
1	WDFY3	4	85611660	T	C
1	WDFY3	4	85609276	C	T
1	WDFY3	4	85600082	T	A
1	WDFY2	13	52332361	A	G
1	WBSCR27	7	73256413	G	A
1	WBP2	17	73843646	C	T
1	WBP1	2	74687133	C	A
1	WASL	7	123332684	G	T
1	WASF3	13	27256798	G	A
1	WASF2	1	27745468	G	A
1	WAS	X	48547152	A	G	x
1	WAS	X	48542683	T	C	x
1	WARS2	1	119683220	G	A
1	WARS	14	100820196	C	A
1	WARS	14	100820155	G	A
1	WAPAL	10	88206188	G	A
1	WAC	10	28872341	T	C
1	VWF	12	6219642	C	T
1	VWF	12	6122779	G	T
1	VWF	12	6120951	C	T
1	VWF	12	6105381	G	A
1	VWF	12	6103656	A	G
1	VWF	12	6103274	G	A
1	VWF	12	6078555	G	A
1	VWF	12	6078526	G	T
1	VWDE	7	12419121	T	A
1	VWCE	11	61026381	G	T
1	VWCE	11	61026240	G	T
1	VWC2	7	49842329	G	A
1	VWC2	7	49815197	C	T
1	VWA5B2	3	183952539	G	T
1	VWA5B1	1	20676714	G	A
1	VWA5B1	1	20637120	C	T
1	VWA3B	2	98709695	G	A
1	VWA3A	16	22144291	A	G
1	VWA3A	16	22144221	C	T
1	VWA3A	16	22132890	G	T
1	VWA2	10	116042321	A	G
1	VWA1	1	1374508	G	A
1	VTN	17	26696759	A	T
1	VTN	17	26696577	G	T
1	VTI1B	14	68126585	T	C
1	VTI1A	10	114298081	T	C	x
1	VTCN1	1	117690329	G	A
1	VSX2	14	74706431	T	C
1	VSTM2B	19	30054753	G	A
1	VSTM2B	19	30020766	G	A
1	VSTM2B	19	30017525	A	G
1	VSNL1	2	17830694	C	T
1	VSIG8	1	159826349	C	T
1	VSIG4	X	65252534	T	G
1	VSIG2	11	124620624	T	C
1	VSIG10L	19	51844969	A	G
1	VSIG10	12	118506204	T	A
1	VSIG1	X	107316583	C	T
1	VRTN	14	74824247	T	G
1	VRK3	19	50482484	T	C
1	VRK2	2	58313486	T	A
1	VRK1	14	97327048	T	G
1	VPS8	3	184769729	G	C
1	VPS8	3	184684496	G	A
1	VPS8	3	184682341	T	C
1	VPS8	3	184632804	A	T
1	VPS8	3	184544006	G	A
1	VPS72	1	151156793	C	A
1	VPS54	2	64148465	T	A
1	VPS54	2	64140377	G	A
1	VPS53	17	556637	G	A
1	VPS52	6	33236299	C	T
1	VPS52	6	33235761	A	G
1	VPS52	6	33234430	G	A
1	VPS4B	18	61064323	G	A
1	VPS4A	16	69354999	C	T
1	VPS4A	16	69354123	G	A
1	VPS45	1	150040718	C	T
1	VPS41	7	38805261	G	A
1	VPS39	15	42481401	T	C
1	VPS39	15	42454327	T	C
1	VPS37B	12	123355556	A	C
1	VPS37B	12	123351702	G	T
1	VPS35	16	46714602	C	T
1	VPS35	16	46705619	A	G
1	VPS35	16	46702902	C	T
1	VPS35	16	46696996	G	A
1	VPS33B	15	91544680	T	C
1	VPS33A	12	122717379	C	T
1	VPS18	15	41193102	G	A
1	VPS18	15	41192945	C	T
1	VPS18	15	41192565	C	T
1	VPS16	20	2844635	C	T
1	VPS13D	1	12446341	A	T
1	VPS13D	1	12439579	C	T
1	VPS13D	1	12383775	C	T
1	VPS13D	1	12353663	A	G
1	VPS13D	1	12353584	C	T
1	VPS13D	1	12337467	T	A
1	VPS13D	1	12331159	G	A
1	VPS13D	1	12318150	C	T
1	VPS13C	15	62333524	A	G
1	VPS13C	15	62305312	G	A
1	VPS13C	15	62255048	A	G
1	VPS13C	15	62221832	C	T
1	VPS13C	15	62208118	C	T
1	VPS13C	15	62204163	C	T
1	VPS13C	15	62174904	C	T
1	VPS13C	15	62167077	A	G
1	VPS13C	15	62160928	C	T
1	VPS13B	8	100883725	G	A
1	VPS13B	8	100883095	C	G
1	VPS13B	8	100865908	A	T
1	VPS13B	8	100844757	C	T
1	VPS13B	8	100791149	G	A
1	VPS13B	8	100779116	G	A
1	VPS13B	8	100732632	A	T
1	VPS13B	8	100654657	A	G
1	VPS13B	8	100520072	G	A
1	VPS13B	8	100493943	T	C
1	VPS13B	8	100454637	A	T
1	VPS13B	8	100205243	G	A
1	VPS13A	9	79960022	A	C
1	VPS13A	9	79952343	T	C
1	VPS13A	9	79936482	C	A
1	VPS13A	9	79922983	A	C
1	VPS13A	9	79897048	C	A
1	VPS13A	9	79891030	T	C
1	VPS13A	9	79853234	T	C
1	VPS11	11	118938561	C	G
1	VPREB3	22	24096540	C	T
1	VPREB3	22	24095108	G	A
1	VPRBP	3	51458238	A	G
1	VPRBP	3	51457671	G	A
1	VPRBP	3	51457421	T	C
1	VNN1	6	133035076	T	C
1	VN1R5	1	247419914	A	T
1	VN1R4	19	53770825	A	G
1	VN1R2	19	53761683	G	A
1	VMP1	17	57816293	C	A
1	VMP1	17	57814877	G	A
1	VMO1	17	4689272	C	T
1	VMA21	X	150573417	T	C
1	VLDLR	9	2635469	T	C
1	VIT	2	36994338	C	A
1	VIT	2	36986112	A	G
1	VIPR2	7	158835805	G	A
1	VIPAR	14	77914837	C	A
1	VIPAR	14	77901716	T	C
1	VIPAR	14	77901649	C	T
1	VIM	10	17275864	A	G
1	VILL	3	38048072	A	C
1	VIL1	2	219305519	C	T
1	VIL1	2	219297658	G	A
1	VGLL4	3	11744501	G	A
1	VGLL1	X	135630774	C	T
1	VEGFC	4	177608653	T	C
1	VDR	12	48258907	C	T
1	VDAC2	10	76972029	G	A
1	VCX3A	X	6451849	C	T
1	VCX2	X	8138636	C	T
1	VCPIP1	8	67577741	A	G
1	VCPIP1	8	67546829	T	G
1	VCP	9	35060868	A	G
1	VCAN	5	82835451	C	T
1	VCAN	5	82789510	C	T
1	VCAM1	1	101188887	C	T
1	VCAM1	1	101186237	A	T
1	VAX2	2	71160129	G	T
1	VAV2	9	136640072	A	G
1	VAV1	19	6828117	T	C
1	VAV1	19	6821859	C	T
1	VAT1L	16	78011508	C	T
1	VARS2	6	30893900	G	A
1	VARS2	6	30882606	C	T
1	VARS	6	31762750	G	A
1	VARS	6	31750886	C	A
1	VARS	6	31750166	G	A
1	VANGL2	1	160395147	G	A
1	VANGL2	1	160389272	G	A
1	VANGL1	1	116226640	A	G
1	VAC14	16	70814742	T	C
1	VAC14	16	70814705	C	A
1	VAC14	16	70778363	C	T
1	UXS1	2	106717555	C	T
1	UXS1	2	106710492	C	T
1	UVRAG	11	75694489	G	A
1	UVRAG	11	75694431	A	G
1	UTS2R	17	80333168	G	A
1	UTS2R	17	80332620	G	A
1	UTS2	1	7913456	G	A
1	UTRN	6	145069403	C	T
1	UTRN	6	145069400	G	A
1	UTRN	6	144860515	T	C
1	UTRN	6	144835865	G	A
1	UTRN	6	144812147	G	A
1	UTRN	6	144780376	C	A
1	UTRN	6	144759958	G	A
1	UTP3	4	71555479	C	T
1	UTP20	12	101760469	G	A
1	UTP20	12	101732724	C	T
1	UTP20	12	101732718	G	T
1	UTP20	12	101731861	G	A
1	UTP20	12	101727217	C	T
1	UTP20	12	101702052	G	A
1	UTP20	12	101680205	T	C
1	UTP18	17	49357831	G	A
1	UTP18	17	49343617	A	T
1	UTP14A	X	129063378	G	T
1	UTF1	10	135044913	C	T
1	USPL1	13	31233355	C	T
1	USPL1	13	31233131	G	A
1	USP9Y	Y	14821419	C	T
1	USP9X	X	41075723	A	G
1	USP9X	X	41060461	T	C
1	USP9X	X	41055850	A	C
1	USP9X	X	41029390	G	A
1	USP9X	X	41012231	T	A
1	USP9X	X	40994034	T	A
1	USP8	15	50784910	T	C
1	USP8	15	50784907	T	C
1	USP8	15	50773978	C	T
1	USP6NL	10	11531149	A	C
1	USP6NL	10	11505727	G	A
1	USP6NL	10	11505388	G	A
1	USP6NL	10	11505170	G	A
1	USP6NL	10	11504600	C	T
1	USP6	17	5073904	T	C	x
1	USP6	17	5048105	T	C	x
1	USP6	17	5036777	C	T	x
1	USP54	10	75277080	G	A
1	USP54	10	75276695	A	C
1	USP54	10	75276575	A	G
1	USP53	4	120213906	C	A
1	USP53	4	120177651	T	C
1	USP51	X	55514793	C	A
1	USP51	X	55514005	T	C
1	USP5	12	6969555	G	A
1	USP49	6	41773646	C	T
1	USP47	11	11951029	G	A
1	USP45	6	99894026	T	C
1	USP44	12	95927809	A	G
1	USP44	12	95926778	A	G
1	USP44	12	95922606	A	G
1	USP42	7	6194573	G	A
1	USP42	7	6193451	G	A
1	USP42	7	6189687	G	T
1	USP40	2	234460050	C	T
1	USP40	2	234442364	A	G
1	USP40	2	234436070	G	A
1	USP37	2	219319676	T	C
1	USP36	17	76823373	A	G
1	USP36	17	76816087	G	A
1	USP36	17	76803635	G	A
1	USP36	17	76794506	C	T
1	USP35	11	77921418	T	G
1	USP35	11	77921347	C	T
1	USP35	11	77911785	G	A
1	USP35	11	77907429	G	A
1	USP34	2	61622102	T	C
1	USP34	2	61571098	T	C
1	USP34	2	61515895	G	T
1	USP34	2	61468782	A	G
1	USP34	2	61463040	C	T
1	USP34	2	61462988	C	T
1	USP32	17	58303569	C	G
1	USP31	16	23083477	G	A
1	USP29	19	57641554	C	T
1	USP28	11	113711447	C	T
1	USP28	11	113685921	C	T
1	USP28	11	113684611	C	T
1	USP28	11	113670119	A	G
1	USP27X	X	49646185	T	C
1	USP27X	X	49645564	C	T
1	USP26	X	132161937	G	A
1	USP26	X	132161879	G	A
1	USP26	X	132161289	A	C
1	USP25	21	17177445	T	C
1	USP24	1	55590229	G	A
1	USP24	1	55569642	C	A
1	USP24	1	55545233	T	C
1	USP24	1	55537523	A	G
1	USP22	17	20924462	C	T
1	USP22	17	20919140	G	T
1	USP21	1	161135184	G	A
1	USP21	1	161133389	G	A
1	USP21	1	161132120	C	T
1	USP21	1	161130903	G	A
1	USP20	9	132638476	C	T
1	USP20	9	132630668	G	C
1	USP20	9	132620759	A	G
1	USP2	11	119229743	T	C
1	USP2	11	119228467	G	A
1	USP19	3	49152434	C	T
1	USP17L2	8	11995987	G	T
1	USP17L2	8	11995488	G	A
1	USP16	21	30415827	C	T
1	USP15	12	62654243	C	T
1	USP13	3	179481945	C	T
1	USP11	X	47100224	C	A
1	USP10	16	84812612	A	G
1	USO1	4	76721828	A	G
1	USO1	4	76721583	C	T
1	USO1	4	76711826	G	A
1	USO1	4	76711372	G	A
1	USO1	4	76650007	A	G
1	USHBP1	19	17375090	G	A
1	USH2A	1	216498809	T	G
1	USH2A	1	216371742	G	A
1	USH2A	1	216370031	G	A
1	USH2A	1	216348617	T	C
1	USH2A	1	216074237	G	A
1	USH2A	1	216052323	T	C
1	USH2A	1	215990388	T	C
1	USH2A	1	215813994	G	A
1	USH2A	1	215808008	C	A
1	USH2A	1	215799136	T	C
1	USH1G	17	72916348	G	A
1	USE1	19	17327080	C	T
1	UROC1	3	126219653	T	A
1	UROC1	3	126202286	C	T
1	URGCP	7	43917064	G	A
1	URGCP	7	43917049	G	A
1	URGCP	7	43916294	T	C
1	URB2	1	229781649	G	A
1	URB2	1	229781619	C	T
1	URB2	1	229773867	G	A
1	URB2	1	229773717	C	T
1	URB2	1	229771084	C	T
1	URB1	21	33746041	C	T
1	URB1	21	33740716	T	C
1	URB1	21	33719887	A	G
1	URB1	21	33716981	G	T
1	URB1	21	33694797	G	A
1	URB1	21	33692912	A	G
1	URB1	21	33691648	C	T
1	URB1	21	33689998	C	T
1	UQCRHL	1	16133902	G	A
1	UQCRC1	3	48641686	C	A
1	UQCRC1	3	48638515	C	T
1	UQCRC1	3	48637995	C	T
1	UPP1	7	48147040	C	T
1	UPK3A	22	45691547	C	T
1	UPK3A	22	45689098	G	A
1	UPF3B	X	118986869	C	A
1	UPF3A	13	115048340	T	A
1	UPF3A	13	115047310	G	A
1	UPF1	19	18960943	G	A
1	UPF0639	14	69991014	C	T
1	UNKL	16	1449447	C	T
1	UNKL	16	1449402	C	T
1	UNKL	16	1448884	C	T
1	UNG	12	109541318	A	G
1	UNG	12	109536334	A	G
1	UNG	12	109536196	C	T
1	UNG	12	109535507	A	G
1	UNC93B1	11	67767105	G	A
1	UNC93A	6	167728763	C	T
1	UNC93A	6	167719472	G	A
1	UNC80	2	210860113	A	G
1	UNC80	2	210843314	C	A
1	UNC80	2	210836990	G	T
1	UNC80	2	210698813	C	T
1	UNC80	2	210683736	C	A
1	UNC80	2	210678443	C	T
1	UNC80	2	210642179	T	C
1	UNC5D	8	35631986	G	A
1	UNC5CL	6	41002515	A	G
1	UNC5CL	6	41000809	G	A
1	UNC5CL	6	41000743	G	T
1	UNC5C	4	96256760	G	A
1	UNC5A	5	176295150	C	T
1	UNC50	2	99227321	T	C
1	UNC45B	17	33510561	C	T
1	UNC45B	17	33475414	G	A
1	UNC13D	17	73830182	C	T
1	UNC13D	17	73826705	C	T
1	UNC13C	15	54630601	A	T
1	UNC13C	15	54542507	G	A
1	UNC13C	15	54529829	C	T
1	UNC13C	15	54307918	G	T
1	UNC13C	15	54306814	A	G
1	UNC13B	9	35382388	C	T
1	UNC13B	9	35382387	T	C
1	UNC13B	9	35310492	T	C
1	UNC13B	9	35295725	C	T
1	UNC13A	19	17759757	C	T
1	UNC13A	19	17758262	C	T
1	UNC13A	19	17752328	C	T
1	UNC119B	12	121154520	C	T
1	UMPS	3	124456610	G	A
1	UMPS	3	124449437	T	C
1	UMOD	16	20357507	G	A
1	ULK4	3	41973460	G	C
1	ULK4	3	41607557	A	G
1	ULK3	15	75131904	G	A
1	ULK1	12	132400687	C	A
1	ULK1	12	132397761	C	G
1	ULK1	12	132395343	C	T
1	ULK1	12	132393459	G	A
1	ULK1	12	132393282	G	A
1	ULBP2	6	150266675	C	T
1	ULBP1	6	150290406	A	G
1	UIMC1	5	176382997	C	T
1	UHRF2	9	6433915	T	C
1	UHRF1BP1L	12	100466581	G	A
1	UHRF1BP1	6	34827168	A	G
1	UHRF1BP1	6	34826580	T	C
1	UHRF1BP1	6	34789591	G	A
1	UHRF1	19	4960793	C	T
1	UHRF1	19	4960700	G	A
1	UHRF1	19	4954690	C	T
1	UHRF1	19	4954681	G	C
1	UHRF1	19	4941925	T	C
1	UHRF1	19	4941923	T	C
1	UHRF1	19	4941851	C	T
1	UHRF1	19	4930781	G	A
1	UHRF1	19	4929440	G	C
1	UGT8	4	115597413	G	A
1	UGT8	4	115544142	T	C
1	UGT3A1	5	35965609	A	G
1	UGT3A1	5	35954482	G	A
1	UGT2B4	4	70351029	T	C
1	UGT2A2	4	70504801	T	C
1	UGT1A9	2	234580708	C	T
1	UGT1A6	2	234601689	A	G
1	UGT1A4	2	234628021	A	G
1	UGT1A3	2	234638008	C	T
1	UGT1A10	2	234545301	G	A
1	UGGT2	13	96642322	A	T
1	UGGT2	13	96622381	T	C
1	UGGT2	13	96592291	T	C
1	UGGT2	13	96543212	T	C
1	UGGT1	2	128932427	T	G
1	UGGT1	2	128867208	A	G
1	UGGT1	2	128865534	T	C
1	UFSP2	4	186336497	G	A
1	UFSP2	4	186329569	T	C
1	UFC1	1	161127977	A	T
1	UCP3	11	73716836	G	A
1	UCP2	11	73688954	T	C
1	UCP2	11	73687939	C	T
1	UCP1	4	141488934	T	C
1	UCKL1	20	62571341	G	T
1	UCK2	1	165859537	C	T
1	UBXN2B	8	59360037	A	G
1	UBXN2A	2	24199883	C	T
1	UBXN11	1	26627506	A	G
1	UBXN11	1	26609217	A	G
1	UBXN11	1	26608891	C	A
1	UBXN10	1	20517692	G	A
1	UBTFL1	11	89819794	T	C
1	UBTD1	10	99327751	C	T
1	UBR5	8	103354852	C	T
1	UBR5	8	103324662	T	C
1	UBR5	8	103310681	T	C
1	UBR5	8	103310629	T	A
1	UBR5	8	103298591	C	G
1	UBR5	8	103284858	A	G
1	UBR5	8	103274247	G	A
1	UBR5	8	103271267	C	T
1	UBR4	1	19504163	T	C
1	UBR4	1	19499743	C	T
1	UBR4	1	19491818	C	T
1	UBR4	1	19488998	A	G
1	UBR4	1	19488984	G	A
1	UBR4	1	19419815	G	A
1	UBR4	1	19403250	C	A
1	UBR3	2	170863689	G	A
1	UBR2	6	42656038	C	T
1	UBR2	6	42612004	G	A
1	UBR2	6	42532123	G	T
1	UBR1	15	43281073	T	A
1	UBR1	15	43268946	G	A
1	UBR1	15	43252887	A	G
1	UBR1	15	43244495	C	T
1	UBQLN4	1	156012611	C	T
1	UBQLN4	1	156012010	C	T
1	UBQLN3	11	5530554	A	G
1	UBQLN1	9	86294822	G	T
1	UBP1	3	33437737	C	T
1	UBN2	7	138969185	T	C
1	UBN2	7	138968722	C	T
1	UBN2	7	138968552	C	A
1	UBN1	16	4926927	A	G
1	UBL3	13	30341787	G	T
1	UBIAD1	1	11345780	C	T
1	UBFD1	16	23578381	C	T
1	UBE4B	1	10239595	G	A
1	UBE4B	1	10211430	A	G
1	UBE4B	1	10163068	C	T
1	UBE4B	1	10161236	C	T
1	UBE4A	11	118244385	G	T
1	UBE3C	7	157041198	T	C
1	UBE3C	7	156974882	C	T
1	UBE3B	12	109972527	C	T
1	UBE3B	12	109928927	G	A
1	UBE3A	15	25616879	G	A
1	UBE3A	15	25615826	A	G
1	UBE3A	15	25599555	G	A
1	UBE3A	15	25599540	C	A
1	UBE2Z	17	47000210	G	T
1	UBE2W	8	74737437	T	C
1	UBE2O	17	74395849	C	T
1	UBE2O	17	74394386	C	T
1	UBE2L6	11	57321910	C	A
1	UBE2L3	22	21975903	G	A
1	UBE2K	4	39779370	A	G
1	UBE2K	4	39776473	C	T
1	UBE2J2	1	1190619	C	T
1	UBE2I	16	1374749	C	T
1	UBE2I	16	1365702	T	C
1	UBE2H	7	129479165	A	G
1	UBE2E3	2	181925447	G	T
1	UBE2E1	3	23932052	A	G
1	UBAP2L	1	154221856	A	G
1	UBAP2	9	33948462	T	C
1	UBAP2	9	33923994	A	G
1	UBAP1	9	34241424	G	A
1	UBAC2	13	99992800	G	T
1	UBA7	3	49847488	C	T
1	UBA7	3	49843567	C	T
1	UBA6	4	68566800	T	C
1	UBA6	4	68510449	T	C
1	UBA6	4	68490729	C	T
1	UBA6	4	68488908	C	T
1	UBA5	3	132394212	G	A
1	UBA2	19	34960031	C	T
1	UBA1	X	47074236	C	T
1	UBA1	X	47060332	C	T
1	U2SURP	3	142741798	T	C
1	U2AF1L4	19	36236061	A	T
1	TYW3	1	75229582	T	C
1	TYW1	7	66660227	T	C
1	TYW1	7	66548433	G	A
1	TYW1	7	66482935	C	T
1	TYR	11	88924380	G	A
1	TYR	11	88911262	C	T
1	TYMS	18	669137	G	A
1	TYK2	19	10475560	A	G
1	TYK2	19	10472580	G	A
1	TYK2	19	10469950	G	A
1	TYK2	19	10468501	G	A
1	TYK2	19	10467282	C	T
1	TXNRD2	22	19882945	C	T
1	TXNRD1	12	104728035	G	A
1	TXNL4B	16	72124519	T	C
1	TXNDC6	3	138037036	A	G
1	TXNDC6	3	138022470	G	A
1	TXNDC5	6	7888983	C	T
1	TXNDC3	7	37927955	A	C
1	TXNDC3	7	37901745	A	G
1	TXNDC3	7	37889876	G	T
1	TXNDC11	16	11781735	T	C
1	TXLNG	X	16859868	G	A
1	TXLNG	X	16859799	G	A
1	TXLNB	6	139564362	G	A
1	TXLNA	1	32646870	G	T
1	TWSG1	18	9396336	G	A
1	TWIST2	2	239757083	G	A
1	TWIST2	2	239757001	A	G
1	TWF2	3	52264905	A	G
1	TUT1	11	62346383	G	T
1	TUSC5	17	1198825	G	A
1	TUSC3	8	15519669	G	A
1	TUSC3	8	15480717	G	A
1	TULP4	6	158927716	G	A
1	TULP4	6	158927665	C	T
1	TULP4	6	158925204	G	T
1	TULP4	6	158923383	C	T
1	TULP4	6	158870180	G	T
1	TULP3	12	3031472	G	A
1	TULP3	12	3030030	T	C
1	TULP1	6	35473923	C	T
1	TULP1	6	35471587	T	C
1	TUFM	16	28857361	G	T
1	TUBGCP6	22	50667897	C	T
1	TUBGCP6	22	50665479	G	A
1	TUBGCP6	22	50664544	G	A
1	TUBGCP6	22	50657310	G	A
1	TUBGCP3	13	113202441	A	C
1	TUBGCP3	13	113143918	G	A
1	TUBGCP2	10	135107261	A	G
1	TUBGCP2	10	135107226	G	A
1	TUBG1	17	40766675	G	A
1	TUBG1	17	40766534	G	T
1	TUBG1	17	40766007	G	A
1	TUBE1	6	112400936	G	A
1	TUBE1	6	112397550	T	G
1	TUBB4Q	4	190904124	C	T
1	TUBB4	19	6501606	C	T
1	TUBB4	19	6495941	T	C
1	TUBB4	19	6495938	T	G
1	TUBB4	19	6495550	G	A
1	TUBB3	16	90002092	C	T
1	TUBB3	16	90001805	G	A
1	TUBB2C	9	140137972	C	T
1	TUBB2B	6	3225900	G	A
1	TUBB2B	6	3225818	C	T
1	TUBB2B	6	3225049	T	C
1	TUBB2A	6	3154930	C	T
1	TUBAL3	10	5443046	T	C
1	TUBAL3	10	5435603	G	A
1	TUBA8	22	18609186	C	T
1	TUBA8	22	18604432	C	T
1	TUBA3D	2	132240376	C	T
1	TUBA3C	13	19752418	C	T
1	TUBA3C	13	19751638	C	T
1	TUBA3C	13	19751083	C	A
1	TUBA1C	12	49663700	G	T
1	TUB	11	8123053	T	C
1	TUB	11	8122467	A	C
1	TUB	11	8122395	G	A
1	TUB	11	8120359	G	T
1	TUB	11	8115672	G	T
1	TTYH3	7	2687085	G	A
1	TTYH2	17	72227033	G	A
1	TTYH1	19	54930336	G	A
1	TTR	18	29172929	A	G
1	TTR	18	29172864	C	T
1	TTPAL	20	43118169	A	G
1	TTPAL	20	43109078	C	T
1	TTPAL	20	43108943	T	C
1	TTPA	8	63985569	G	T
1	TTN	2	179664304	G	A
1	TTN	2	179659223	T	C
1	TTN	2	179659190	G	A
1	TTN	2	179641444	C	T
1	TTN	2	179640412	G	A
1	TTN	2	179639019	C	T
1	TTN	2	179613014	G	A
1	TTN	2	179604146	C	T
1	TTN	2	179599118	A	T
1	TTN	2	179598554	G	A
1	TTN	2	179597812	C	T
1	TTN	2	179597387	G	C
1	TTN	2	179592552	C	T
1	TTN	2	179587890	C	T
1	TTN	2	179585226	A	G
1	TTN	2	179583568	G	T
1	TTN	2	179579062	G	A
1	TTN	2	179576811	G	A
1	TTN	2	179548797	G	A
1	TTN	2	179499194	T	C
1	TTN	2	179485122	C	T
1	TTN	2	179483429	C	T
1	TTN	2	179469802	T	C
1	TTN	2	179468703	A	G
1	TTN	2	179466458	A	G
1	TTN	2	179466196	T	C
1	TTN	2	179460481	G	T
1	TTN	2	179458825	C	T
1	TTN	2	179455693	A	G
1	TTN	2	179454499	C	T
1	TTN	2	179451418	T	C
1	TTN	2	179446886	A	T
1	TTN	2	179443706	C	A
1	TTN	2	179443605	C	T
1	TTN	2	179442428	C	A
1	TTN	2	179441920	C	T
[truncated: 18,541 more rows]

## Sheet: Indels in 3'UTR
Indels in 3'UTR regions of MMR-deficient tumors as identified by whole-genome and -exome sequencing (n=16)
Nr of affected samples	Gene	Chromosome	Start Position	Affacted homopolymer base	Affected homopolymer length	Cancer Census Gene	Nr of insertions	Nr of deletions	Evidence
14	AHCYL1	1	110566211	A	14		0	14	AAA/-;A/-;A/-;AA/-;A/-;A/-;A/-;A/-;A/-;AA/-;A/-;AA/-;AA/-;AAA/-
14	PRCC	1	156770553	T	12	x	1	13	TT/-;TT/-;T/-;T/-;-/T;TT/-;T/-;T/-;T/-;T/-;T/-;T/-;T/-;T/-
14	CD5L	1	157801231	A	13		0	14	AA/-;A/-;AA/-;AA/-;A/-;AA/-;A/-;A/-;A/-;A/-;A/-;A/-;A/-;AAA/-
14	CACNB4	2	152695179	T	12		0	14	TT/-;TC/-;TT/-;TC/-;TT/-;TC/-;T/-;TTC/-;T/-;T/-;TT/-;T/-;T/-;TC/-
14	OPN5	6	47792560	T	13		1	13	TTT/-;TTT/-;T/-;T/-;TT/-;TT/-;T/-;TT/-;TT/-;TTT/-;T/-;T/-;-/T;TT/-
14	DYRK2	12	68054878	T	12		0	14	TT/-;T/-;TT/-;T/-;TT/-;T/-;TT/-;T/-;T/-;TT/-;TT/-;TTT/-;TT/-;TT/-
14	PPP1R12A	12	80169698	T	13		0	14	TTTT/-;T/-;TTT/-;T/-;TT/-;T/-;T/-;TT/-;TT/-;TTT/-;T/-;T/-;TTT/-;TTT/-
14	WIPF2	17	38436905	T	13		0	14	TT/-;TTT/-;TTT/-;TTT/-;T/-;T/-;TTT/-;T/-;T/-;TTT/-;TT/-;TT/-;TTT/-;TTT/-
14	DIDO1	20	61536692	A	11		0	14	A/-;A/-;A/-;A/-;A/-;A/-;A/-;A/-;A/-;A/-;A/-;A/-;A/-;A/-
14	ZNF275	X	152617044	A	12		0	14	A/-;AA/-;A/-;A/-;A/-;AA/-;AA/-;A/-;A/-;AA/-;A/-;A/-;A/-;A/-
13	EIF4G3	1	21133287	A	13		0	13	AAA/-;A/-;A/-;A/-;A/-;A/-;AA/-;A/-;A/-;A/-;A/-;AAA/-;A/-
13	LRRC8D	1	90401406	T	11		0	13	T/-;T/-;T/-;T/-;T/-;T/-;T/-;T/-;T/-;T/-;T/-;TT/-;T/-
13	FAM20B	1	179044907	A	12		0	13	AA/-;A/-;A/-;A/-;A/-;A/-;A/-;A/-;A/-;A/-;AA/-;AA/-;A/-
13	TOR1AIP2	1	179814858	A	12		0	13	AA/-;AA/-;AA/-;A/-;AA/-;AA/-;A/-;A/-;A/-;AA/-;AA/-;AA/-;AA/-
13	DUSP10	1	221875157	A	14		0	13	AA/-;A/-;A/-;A/-;A/-;A/-;A/-;A/-;A/-;A/-;AA/-;AAA/-;AAAA/-
13	XRN1	3	142026211	A	11		0	13	AA/-;A/-;A/-;A/-;A/-;AA/-;A/-;AA/-;AA/-;A/-;A/-;AA/-;A/-
13	RAP2B	3	152881425	T	17		0	13	TTTTTTTT/-;TTTTTT/-;TTT/-;TT/-;TTTT/-;TTT/-;TTTTTTT/-;TTTT/-;TT/-;TTTTTTT/-;TTTTTT/-;TTTTTTT/-;TTTTT/-
13	SHROOM3	4	77701306	A	12		0	13	AAA/-;AA/-;A/-;A/-;A/-;A/-;AA/-;A/-;AAA/-;A/-;A/-;A/-;AA/-
13	NPR3	5	32787132	A	11		1	12	AA/-;A/-;AA/-;A/-;A/-;AA/-;A/-;AA/-;AA/-;A/-;-/A;AA/-;A/-
13	SAMD12	8	119209321	A	11		1	12	A/-;A/-;A/-;-/A;AA/-;A/-;A/-;A/-;A/-;AA/-;A/-;A/-;A/-
13	NAV2	11	20141368	A	11		2	11	-/A;A/-;-/A;A/-;A/-;A/-;A/-;A/-;A/-;AA/-;A/-;A/-;A/-
13	GABPB1	15	50570605	A	13		0	13	AA/-;A/-;AA/-;A/-;A/-;AAA/-;AAA/-;A/-;A/-;AA/-;AA/-;AA/-;A/-
13	NARG2	15	60712504	T	13		0	13	TTT/-;TT/-;TC/-;T/-;TT/-;TTT/-;T/-;T/-;T/-;T/-;TT/-;TT/-;T/-
13	LYRM1	16	20935843	T	11		0	13	TT/-;T/-;T/-;TT/-;T/-;TT/-;T/-;T/-;TT/-;T/-;T/-;T/-;TT/-
13	STK4	20	43707209	T	15		0	13	TTT/-;TT/-;TTTTT/-;T/-;TTTT/-;T/-;TTT/-;TTT/-;TT/-;TTTT/-;TTT/-;TTTT/-;TTTT/-
13	ZNF217	20	52185290	A	13		1	12	AAA/-;AAA/-;-/A;A/-;AA/-;A/-;A/-;A/-;A/-;AA/-;AA/-;AAA/-;AAA/-
13	PPP1R3D	20	58512722	T	13		0	13	TTTT/-;T/-;TT/-;TTT/-;TTTT/-;TT/-;TT/-;T/-;TTTT/-;T/-;TTT/-;TTTT/-;TTT/-
13	KLHL4	X	86924601	A	13		0	13	AA/-;A/-;A/-;AA/-;A/-;A/-;A/-;A/-;AA/-;A/-;A/-;AAA/-;AAA/-
13	MAGEC2	X	141290303	A	15		0	13	AAAA/-;AAAAAA/-;A/-;AA/-;AAA/-;A/-;AAA/-;A/-;AA/-;AAAA/-;AA/-;AA/-;AA/-
12	EIF4G3	1	21133497	T	13		0	12	T/-;T/-;TT/-;T/-;T/-;T/-;T/-;T/-;T/-;TT/-;T/-;T/-
12	MACF1	1	39951743	A	12		0	12	AAA/-;A/-;A/-;AA/-;AA/-;A/-;A/-;AAA/-;A/-;A/-;A/-;AA/-
12	EPS15	1	51821386	A	13	x	0	12	AAA/-;A/-;AA/-;AA/-;AA/-;AA/-;A/-;A/-;A/-;A/-;A/-;A/-
12	HRNR	1	152184857	T	11		0	12	T/-;T/-;T/-;T/-;T/-;T/-;T/-;T/-;TT/-;T/-;T/-;T/-
12	LHX9	1	197898396	T	12		1	11	TT/-;T/-;T/-;TT/-;TT/-;T/-;T/-;T/-;-/T;T/-;TT/-;T/-
12	PRKD3	2	37478760	T	12		0	12	TT/-;T/-;TTT/-;TT/-;T/-;T/-;T/-;T/-;T/-;T/-;TT/-;TT/-
12	CYP1B1	2	38297056	T	12		1	11	TTT/-;T/-;TTT/-;TT/-;TT/-;T/-;T/-;T/-;T/-;-/T;T/-;T/-
12	BCL11A	2	60685410	T	12	x	0	12	TT/-;T/-;TT/-;T/-;T/-;T/-;T/-;TT/-;T/-;T/-;T/-;T/-
12	PEX13	2	61276333	T	15		0	12	TTTTT/-;TT/-;TT/-;TT/-;T/-;TT/-;T/-;TT/-;TT/-;TT/-;TT/-;TTT/-
12	CACNB4	2	152694132	T	11		1	11	T/-;T/-;T/-;T/-;T/-;T/-;T/-;T/-;T/-;TT/-;-/T;T/-
12	IGFBP5	2	217537026	T	16		0	12	TT/-;TTT/-;TTTT/-;TT/-;TT/-;T/-;T/-;TTT/-;TT/-;TTTT/-;TTT/-;TTT/-
12	SUCNR1	3	151599652	A	14		0	12	AAAAA/-;A/-;AA/-;A/-;A/-;A/-;A/-;A/-;A/-;AAA/-;AA/-;AA/-
12	NCEH1	3	172348808	A	12		0	12	A/-;A/-;A/-;A/-;AA/-;A/-;A/-;A/-;A/-;A/-;A/-;A/-
12	LMLN	3	197769261	A	11		0	12	AA/-;A/-;AA/-;A/-;A/-;A/-;A/-;A/-;A/-;A/-;A/-;A/-
12	SRSF3	6	36570854	T	14		0	12	TTT/-;TTT/-;TT/-;T/-;TTT/-;T/-;TT/-;T/-;TTT/-;TTT/-;T/-;TTT/-
12	VEGFA	6	43754177	A	12		0	12	AAAA/-;A/-;A/-;AA/-;A/-;AA/-;A/-;AA/-;AAA/-;A/-;AAAA/-;AA/-
12	FAM46A	6	82458104	A	13		0	12	A/-;A/-;A/-;AAAG/-;A/-;A/-;A/-;A/-;A/-;A/-;AAA/-;AA/-
12	IFNGR1	6	137518967	A	14		0	12	AAA/-;A/-;A/-;AA/-;A/-;AA/-;A/-;A/-;A/-;A/-;AA/-;AA/-
12	TMEM106B	7	12273304	A	13		0	12	AAA/-;A/-;AAA/-;A/-;A/-;AAA/-;A/-;A/-;A/-;AA/-;AA/-;AA/-
12	ZKSCAN1	7	99633042	T	12		1	11	TTT/-;T/-;-/T;T/-;TT/-;TTT/-;T/-;T/-;T/-;TT/-;TT/-;T/-
12	ING3	7	120596744	A	11		1	11	A/-;A/-;A/-;A/-;A/-;AA/-;A/-;-/A;AA/-;A/-;A/-;A/-
12	MSR1	8	15997801	A	11		0	12	A/-;AA/-;A/-;A/-;A/-;A/-;A/-;A/-;A/-;A/-;A/-;A/-
12	RSPO2	8	108912569	A	11		0	12	AA/-;A/-;A/-;A/-;A/-;A/-;AA/-;AA/-;A/-;AA/-;AA/-;A/-
12	IFT74	9	27062803	A	13		1	11	AAA/-;AA/-;AA/-;-/A;A/-;A/-;A/-;A/-;A/-;A/-;AAA/-;AA/-
12	SPIN1	9	91090831	A	12		1	11	-/A;A/-;A/-;A/-;A/-;A/-;A/-;A/-;A/-;AA/-;A/-;A/-
12	LARP4B	10	856117	A	13		0	12	AA/-;A/-;A/-;A/-;AA/-;A/-;A/-;A/-;AA/-;AA/-;A/-;AA/-
12	KAT6B	10	76790936	A	13		1	11	AA/-;A/-;AA/-;-/A;AAA/-;A/-;AA/-;A/-;A/-;A/-;A/-;A/-
12	TRIM66	11	8637073	T	13		0	12	T/-;T/-;TT/-;T/-;T/-;T/-;T/-;T/-;T/-;TT/-;T/-;T/-
12	CBL	11	119177652	A	13	x	0	12	AA/-;A/-;A/-;A/-;A/-;AA/-;A/-;A/-;A/-;AA/-;AA/-;AAA/-
12	SENP1	12	48436769	T	11		0	12	TT/-;T/-;T/-;T/-;T/-;T/-;T/-;T/-;TT/-;T/-;T/-;T/-
12	CBX5	12	54628042	T	13		0	12	TTT/-;TTT/-;TT/-;T/-;TT/-;T/-;TT/-;TT/-;T/-;T/-;TT/-;TT/-
12	SRGAP1	12	64539337	T	13		0	12	T/-;TTT/-;T/-;TT/-;T/-;T/-;T/-;T/-;T/-;T/-;T/-;T/-
12	KCNMB4	12	70824839	A	14		0	12	A/-;A/-;AAAA/-;A/-;A/-;A/-;A/-;AA/-;A/-;AA/-;AAA/-;AA/-
12	TMTC3	12	88591980	T	13		0	12	TTT/-;TT/-;TT/-;T/-;TT/-;TTTT/-;TT/-;TT/-;TT/-;TT/-;T/-;T/-
12	BTG1	12	92535676	A	12	x	0	12	AA/-;A/-;A/-;AA/-;A/-;AA/-;A/-;A/-;A/-;A/-;A/-;A/-
12	ANKS1B	12	99138458	T	12		0	12	T/-;T/-;TT/-;T/-;T/-;T/-;T/-;T/-;TT/-;T/-;T/-;T/-
12	C14orf101	14	57114800	A	13		1	11	AA/-;A/-;A/-;A/-;-/A;A/-;AA/-;AAA/-;A/-;A/-;AA/-;A/-
12	ATXN3	14	92527592	A	11		1	11	A/-;A/-;A/-;AA/-;A/-;A/-;-/A;AA/-;A/-;AA/-;A/-;A/-
12	PRTG	15	55903922	A	11		1	11	A/-;A/-;A/-;A/-;A/-;A/-;-/A;A/-;A/-;A/-;A/-;A/-
12	AEN	15	89174889	T	12		0	12	TT/-;TT/-;T/-;T/-;T/-;T/-;T/-;TT/-;TT/-;T/-;T/-;T/-
12	WSB1	17	25640281	T	15		0	12	TTT/-;T/-;TT/-;T/-;TT/-;T/-;T/-;T/-;T/-;T/-;TTT/-;T/-
12	UBE2Z	17	47005702	A	11		0	12	A/-;A/-;A/-;A/-;A/-;AA/-;A/-;AA/-;A/-;A/-;A/-;A/-
12	DLGAP4	20	35156540	T	11		1	11	TT/-;T/-;TT/-;-/T;T/-;TT/-;T/-;T/-;T/-;T/-;T/-;TT/-
12	TGIF2	20	35220572	A	14		0	12	AAAAA/-;AA/-;A/-;A/-;AA/-;AA/-;A/-;A/-;A/-;AA/-;AAA/-;AAAA/-
12	DGCR8	22	20099230	C	16		0	12	CCCCCCC/-;CCCCC/-;CCCCCC/-;CCCCCC/-;CCCCCC/-;CCACCCG/-;CCCCCC/-;CCCCCC/-;CCCCCC/-;CCCCCCCA/-;CCCCCC/-;CCCCCCCCCA/-
12	SH3KBP1	X	19552232	T	13		1	11	T/-;TT/-;TT/-;T/-;TT/-;-/T;TT/-;T/-;T/-;T/-;T/-;T/-
12	EDA2R	X	65815930	T	12		0	12	TT/-;TT/-;TT/-;T/-;T/-;T/-;T/-;T/-;T/-;T/-;T/-;T/-
12	PGK1	X	77381771	T	13		0	12	TT/-;T/-;T/-;TT/-;T/-;TT/-;TT/-;T/-;T/-;T/-;T/-;TTT/-
12	NKRF	X	118722358	T	12		0	12	TT/-;T/-;TT/-;T/-;TT/-;T/-;T/-;T/-;TT/-;T/-;TT/-;TT/-
12	ZBTB33	X	119390644	T	14		1	11	T/-;T/-;T/-;TT/-;TT/-;-/T;T/-;TT/-;T/-;TT/-;TTT/-;T/-
12	ZNF185	X	152140996	C	10		0	12	C/-;C/-;CC/-;C/-;C/-;C/-;C/-;C/-;C/-;CC/-;C/-;C/-
11	TMEM57	1	25826053	T	12		0	11	TT/-;TT/-;T/-;T/-;T/-;T/-;T/-;T/-;TT/-;TTTT/-;TT/-
11	CSMD2	1	33979968	T	12		0	11	TT/-;T/-;TT/-;T/-;T/-;T/-;T/-;T/-;T/-;T/-;T/-
11	NFIA	1	61924360	T	17		1	10	TTTTT/-;TTTTT/-;TT/-;TTT/-;TTT/-;TTT/-;T/-;-/TT;TTT/-;TG/-;TTT/-
11	SLC35D1	1	67465372	A	13		1	10	A/-;A/-;A/-;A/-;A/-;A/-;A/-;A/-;A/-;-/A;AA/-
11	GBP1	1	89518866	T	13		0	11	TT/-;T/-;T/-;T/-;T/-;T/-;T/-;T/-;T/-;TT/-;TT/-
11	SASS6	1	100549699	A	16		1	10	AAAAA/-;A/-;A/-;A/-;A/-;-/A;AA/-;A/-;A/-;A/-;AAA/-
11	DRAM2	1	111660182	A	11		0	11	A/-;A/-;A/-;A/-;A/-;A/-;A/-;A/-;A/-;A/-;AA/-
11	POGZ	1	151377009	A	13		0	11	A/-;A/-;A/-;A/-;A/-;A/-;A/-;A/-;A/-;AA/-;AA/-
11	MEX3A	1	156043945	T	11		0	11	TT/-;TT/-;T/-;T/-;T/-;T/-;T/-;T/-;TT/-;TT/-;T/-
11	CD1E	1	158327026	T	13		0	11	T/-;T/-;TT/-;T/-;TT/-;T/-;T/-;T/-;TT/-;T/-;TTT/-
11	FMO2	1	171178336	A	11		0	11	A/-;A/-;A/-;A/-;A/-;A/-;A/-;A/-;A/-;A/-;A/-
11	ZNF281	1	200375823	T	12		0	11	T/-;T/-;TG/-;T/-;TG/-;T/-;T/-;T/-;T/-;T/-;T/-
11	PPP1R15B	1	204375120	A	11		0	11	AAA/-;A/-;A/-;A/-;A/-;A/-;A/-;A/-;A/-;A/-;AA/-
11	DSTYK	1	205116001	T	15		0	11	TTTT/-;T/-;TTTT/-;TTTT/-;T/-;T/-;T/-;TTTT/-;TT/-;TTTTT/-;TTT/-
11	DUSP10	1	221874930	A	16		0	11	AAAA/-;AA/-;AAA/-;A/-;AAA/-;A/-;A/-;AAA/-;A/-;AAA/-;AAAAA/-
11	KCNK1	1	233807668	A	11		1	10	A/-;A/-;A/-;A/-;A/-;A/-;A/-;A/-;-/A;A/-;A/-
11	CEP170	1	243288182	T	11		1	10	T/-;TT/-;T/-;TT/-;-/T;T/-;T/-;T/-;TT/-;T/-;T/-
11	EPT1	2	26617515	T	11		0	11	TT/-;T/-;T/-;T/-;T/-;T/-;T/-;T/-;T/-;T/-;TT/-
11	PRKD3	2	37479024	A	11		1	10	A/-;A/-;A/-;A/-;-/A;A/-;A/-;A/-;A/-;A/-;A/-
11	STARD7	2	96851900	A	14		0	11	AAA/-;A/-;A/-;A/-;A/-;A/-;A/-;A/-;A/-;AAA/-;AA/-
11	RNF149	2	101893234	A	10		0	11	AA/-;A/-;A/-;A/-;A/-;A/-;A/-;A/-;A/-;A/-;AA/-
11	RAB6C	2	130739713	T	13		1	10	T/-;T/-;T/-;TT/-;T/-;T/-;TT/-;-/T;T/-;T/-;T/-
11	MCM6	2	136597794	A	15		0	11	AAA/-;A/-;AA/-;A/-;AA/-;AA/-;A/-;A/-;A/-;A/-;AAAA/-
11	TRAK2	2	202242604	A	12		1	10	A/-;A/-;-/A;A/-;AA/-;AA/-;A/-;AAA/-;AA/-;AA/-;AA/-
11	VGLL4	3	11599950	T	13		0	11	TTT/-;T/-;TTT/-;TT/-;T/-;TT/-;T/-;TT/-;T/-;TTT/-;TTT/-
11	ABHD5	3	43762405	A	12		2	9	AA/-;A/-;A/-;A/-;A/-;A/-;AA/-;-/A;A/-;AA/-;-/A
11	ATXN7	3	63987680	A	15		0	11	AAAA/-;AA/-;AA/-;AA/-;A/-;AA/-;AA/-;AAA/-;A/-;AAAA/-;AAA/-
11	FOXP1	3	71007783	A	19	x	0	11	AAAAAA/-;AAA/-;AAAAA/-;AA/-;AAA/-;AA/-;AAA/-;AA/-;AAAAAA/-;A/-;AAAAAA/-
11	KIAA2018	3	113371322	A	11		0	11	A/-;A/-;A/-;A/-;A/-;A/-;A/-;A/-;A/-;A/-;A/-
11	TMCC1	3	129368266	T	13		0	11	TT/-;T/-;T/-;T/-;T/-;T/-;T/-;TT/-;T/-;T/-;T/-
11	KLF3	4	38699105	T	14		1	10	T/-;T/-;T/-;T/-;TTT/-;T/-;TTT/-;-/T;TT/-;TTTT/-;T/-
11	SLAIN2	4	48428164	T	11		3	8	T/-;-/T;-/T;TT/-;T/-;T/-;T/-;T/-;-/T;T/-;T/-
11	LPHN3	4	62936764	T	12		0	11	T/-;T/-;T/-;T/-;T/-;T/-;T/-;T/-;T/-;TT/-;T/-
11	BMPR1B	4	96076114	T	13		0	11	TT/-;TT/-;TTT/-;T/-;TT/-;T/-;T/-;T/-;TT/-;T/-;TTT/-
11	NIPBL	5	37065443	A	12		1	10	A/-;A/-;A/-;AA/-;A/-;A/-;A/-;A/-;-/A;AA/-;A/-
11	SREK1IP1	5	64017403	A	12		2	9	AAAA/-;-/A;A/-;-/A;AAA/-;AA/-;A/-;AA/-;A/-;A/-;AAA/-
11	ERBB2IP	5	65375201	T	15		0	11	TT/-;T/-;TT/-;TT/-;T/-;T/-;T/-;T/-;T/-;T/-;T/-
11	TMED7	5	114950623	A	14		1	10	AA/-;A/-;AA/-;AA/-;AA/-;A/-;AA/-;-/A;AA/-;A/-;AAA/-
11	CSNK1G3	5	122950255	T	13		0	11	TT/-;TT/-;T/-;T/-;T/-;TT/-;T/-;T/-;T/-;T/-;TT/-
11	CCNI2	5	132089649	T	24		1	10	TTTTTTTT/-;TTTTT/-;-/G;TTTTT/-;TTTTTTTT/-;TTTT/-;TTTTTT/-;TTTTTTTTT/-;TT/-;TTTTTT/-;TTTTTTTTTT/-
11	HNRNPA0	5	137087802	A	16		1	10	A/-;AAA/-;A/-;-/A;AAA/-;AAA/-;AAAA/-;AAAA/-;AA/-;AA/-;AAAAAA/-
11	EBF1	5	158123906	T	13	x	1	10	T/-;T/-;T/-;T/-;-/T;T/-;T/-;T/-;T/-;TTT/-;TT/-
11	TMEM14B	6	10756864	A	11		1	10	A/-;A/-;AA/-;-/A;A/-;A/-;A/-;A/-;A/-;A/-;A/-
11	AKIRIN2	6	88384774	A	14		1	10	AAAA/-;AA/-;-/A;A/-;AAA/-;A/-;A/-;AA/-;AA/-;AAA/-;A/-
11	FYN	6	111982556	T	12		1	10	TTT/-;T/-;TT/-;-/T;T/-;T/-;TT/-;T/-;TT/-;T/-;T/-
11	STX11	6	144511721	T	12		1	10	TT/-;T/-;TT/-;T/-;TTT/-;-/T;TT/-;TTT/-;T/-;TT/-;T/-
11	GTF2H5	6	158616174	T	15		0	11	TTTT/-;TTT/-;TT/-;TT/-;TT/-;TT/-;TT/-;T/-;T/-;TT/-;T/-
11	ACTB	7	5567255	A	16		1	10	AAA/-;A/-;-/A;AA/-;AA/-;A/-;A/-;A/-;A/-;A/-;AAA/-
11	TRA2A	7	23544784	A	11		1	10	AA/-;AA/-;A/-;-/A;A/-;A/-;A/-;A/-;AA/-;A/-;A/-
11	CAV1	7	116199669	A	14		0	11	AA/-;A/-;AA/-;A/-;AA/-;AA/-;A/-;AA/-;AAA/-;A/-;AA/-
11	ING3	7	120615331	A	14		1	10	A/-;AA/-;A/-;AA/-;A/-;-/AA;A/-;A/-;A/-;AA/-;AA/-
11	TMEM209	7	129805894	A	12		0	11	AA/-;A/-;AA/-;A/-;A/-;AA/-;A/-;A/-;AA/-;A/-;A/-
11	CREB3L2	7	137561928	A	11	x	0	11	A/-;A/-;A/-;A/-;A/-;A/-;A/-;A/-;A/-;A/-;A/-
11	HIPK2	7	139249948	A	14		0	11	A/-;A/-;A/-;A/-;AA/-;AA/-;A/-;AA/-;A/-;AAA/-;AA/-
11	HIPK2	7	139250451	T	11		0	11	TT/-;T/-;TC/-;T/-;TC/-;T/-;T/-;TC/-;T/-;T/-;T/-
11	KCTD9	8	25286172	A	12		1	10	A/-;A/-;A/-;A/-;A/-;A/-;A/-;A/-;-/A;A/-;A/-
11	MAK16	8	33356826	T	13		0	11	T/-;T/-;TTT/-;T/-;TT/-;T/-;T/-;TT/-;T/-;T/-;T/-
11	RAB11FIP1	8	37718708	A	13		0	11	AAA/-;AA/-;A/-;A/-;AA/-;A/-;A/-;AAA/-;A/-;AA/-;AAA/-
11	VCPIP1	8	67545798	A	15		0	11	AA/-;A/-;A/-;A/-;A/-;A/-;A/-;A/-;A/-;AA/-;A/-
11	RUNX1T1	8	92972023	T	12		0	11	T/-;T/-;T/-;T/-;T/-;T/-;T/-;T/-;T/-;T/-;TTTT/-
11	ESRP1	8	95719493	A	11		0	11	A/-;A/-;A/-;AA/-;A/-;A/-;A/-;A/-;A/-;A/-;A/-
11	SNX31	8	101585896	T	11		1	10	T/-;T/-;T/-;-/TT;T/-;T/-;T/-;T/-;T/-;T/-;T/-
11	TMEM65	8	125325218	A	11		0	11	A/-;A/-;A/-;A/-;A/-;A/-;A/-;A/-;AA/-;AAA/-;A/-
11	IL33	9	6256985	T	12		0	11	T/-;T/-;TT/-;TT/-;T/-;TT/-;T/-;TT/-;T/-;T/-;T/-
11	VCP	9	35056079	T	12		1	10	T/-;-/T;TT/-;T/-;T/-;T/-;T/-;T/-;T/-;TT/-;TT/-
11	ZNF169	9	97063726	A	11		0	11	A/-;A/-;A/-;A/-;A/-;A/-;A/-;A/-;A/-;A/-;A/-
11	CELF2	10	11373246	A	14		0	11	AAAA/-;A/-;AA/-;AA/-;AA/-;A/-;A/-;A/-;A/-;A/-;AAAA/-
11	CELF2	10	11373309	A	12		0	11	AA/-;A/-;A/-;A/-;AA/-;A/-;A/-;A/-;AA/-;A/-;A/-
11	FRMD4A	10	13686798	A	12		0	11	AA/-;A/-;A/-;A/-;A/-;AA/-;A/-;A/-;A/-;AAA/-;AA/-
11	PTEN	10	89725294	T	11	x	0	11	TTT/-;T/-;T/-;T/-;T/-;T/-;T/-;T/-;T/-;T/-;T/-
11	GPAM	10	113910872	T	12		0	11	TTT/-;TT/-;TT/-;TT/-;TT/-;T/-;T/-;T/-;TT/-;TTT/-;TTT/-
11	GFRA1	10	117823768	A	12		0	11	A/-;AAA/-;A/-;A/-;AA/-;A/-;A/-;A/-;A/-;A/-;A/-
11	RAB6A	11	73387528	A	12		0	11	A/-;A/-;A/-;A/-;A/-;A/-;A/-;A/-;A/-;A/-;AAA/-
11	CADM1	11	115047033	T	14		0	11	TTT/-;TT/-;TTTT/-;TTTT/-;T/-;TT/-;TTT/-;T/-;TTT/-;TTT/-;T/-
11	ATP2B1	12	89984194	T	13		0	11	TTTT/-;TT/-;T/-;T/-;T/-;TT/-;T/-;T/-;T/-;TTT/-;T/-
11	USP44	12	95911790	A	11		1	10	AA/-;A/-;-/A;A/-;A/-;A/-;A/-;A/-;A/-;A/-;A/-
11	CAMKK2	12	121676366	A	11		0	11	A/-;A/-;A/-;A/-;A/-;A/-;A/-;A/-;A/-;A/-;AA/-
11	RIMBP2	12	130883555	T	13		0	11	T/-;TT/-;T/-;T/-;T/-;T/-;T/-;TT/-;T/-;TTT/-;T/-
11	FGF9	13	22278025	T	13		0	11	T/-;T/-;T/-;T/-;TT/-;T/-;T/-;T/-;TT/-;T/-;TT/-
11	NHLRC3	13	39623185	T	15		0	11	TTTTT/-;TTTT/-;TTT/-;TT/-;TTTT/-;T/-;TTTT/-;TTT/-;T/-;TTTTT/-;TTTTTT/-
11	MYCBP2	13	77619037	T	14		1	10	TTT/-;T/-;-/T;T/-;TT/-;T/-;T/-;T/-;T/-;TTT/-;T/-
11	RAP2A	13	98118464	A	14		0	11	AAAA/-;A/-;AA/-;A/-;AA/-;AA/-;A/-;A/-;AAA/-;AAA/-;AAA/-
11	TMCO3	13	114204129	T	12		0	11	TT/-;TT/-;TT/-;TT/-;T/-;TT/-;T/-;T/-;TT/-;T/-;TT/-
11	NPAS3	14	34271069	A	12		0	11	GA/-;A/-;AA/-;A/-;AA/-;AA/-;AA/-;A/-;AA/-;A/-;A/-
11	MAPK1IP1L	14	55535729	T	13		1	10	TT/-;T/-;T/-;T/-;-/T;T/-;T/-;TT/-;TT/-;T/-;TT/-
11	SPTB	14	65213611	A	13		0	11	AA/-;AAA/-;A/-;A/-;A/-;A/-;AA/-;A/-;A/-;AAA/-;AA/-
11	DICER1	14	95555538	T	13	x	0	11	TTT/-;T/-;T/-;T/-;TT/-;T/-;T/-;T/-;TT/-;TT/-;TTT/-
11	C15orf29	15	34434106	T	12		0	11	TT/-;TT/-;TT/-;T/-;T/-;T/-;TT/-;TTT/-;TT/-;T/-;T/-
11	EHD4	15	42191705	A	12		0	11	A/-;A/-;A/-;A/-;A/-;A/-;A/-;A/-;A/-;AA/-;AA/-
11	TTBK2	15	43037303	A	12		2	9	A/-;A/-;-/A;-/A;A/-;A/-;A/-;AA/-;A/-;A/-;A/-
11	ARHGAP17	16	24930801	A	14		1	10	AA/-;A/-;A/-;AA/-;A/-;AA/-;-/A;AA/-;AA/-;A/-;AAA/-
11	C16orf82	16	27080038	T	16		0	11	TTT/-;TTT/-;TT/-;T/-;TT/-;TT/-;T/-;TT/-;TTT/-;TTT/-;TTT/-
11	CBFB	16	67133069	T	11	x	1	10	TT/-;T/-;TT/-;T/-;T/-;T/-;-/T;T/-;TT/-;T/-;T/-
11	C17orf63	17	27083745	T	12		0	11	TTT/-;TT/-;TT/-;T/-;T/-;TT/-;T/-;T/-;T/-;T/-;TT/-
11	MED1	17	37561713	T	13		0	11	TT/-;T/-;T/-;TT/-;T/-;T/-;TTT/-;TT/-;TT/-;T/-;T/-
11	DUSP3	17	41846173	A	12		0	11	A/-;A/-;AA/-;A/-;A/-;A/-;A/-;A/-;A/-;A/-;A/-
11	CCDC43	17	42754917	T	13		0	11	TTTT/-;TT/-;TT/-;T/-;TT/-;TT/-;TT/-;T/-;T/-;TT/-;TT/-
11	YPEL2	17	57478523	T	11		2	9	T/-;T/-;TT/-;T/-;-/T;T/-;T/-;TT/-;T/-;T/-;-/T
11	SMAD4	18	48609832	T	11		1	10	T/-;T/-;-/TT;T/-;T/-;T/-;T/-;T/-;T/-;T/-;T/-
11	TCF4	18	52894480	A	13		1	10	AAA/-;A/-;AA/-;AAA/-;A/-;-/AA;A/-;A/-;AA/-;AAA/-;A/-
11	ZADH2	18	72913186	T	11		0	11	TT/-;T/-;T/-;T/-;T/-;T/-;T/-;T/-;T/-;T/-;T/-
11	NFIX	19	13208002	T	13		0	11	TT/-;T/-;T/-;T/-;TT/-;TT/-;T/-;T/-;T/-;TT/-;T/-
11	LSM14A	19	34718608	T	12		0	11	TTT/-;T/-;TT/-;T/-;T/-;T/-;T/-;TT/-;TTT/-;T/-;TT/-
11	FLRT3	20	14305761	T	12		2	9	T/-;T/-;T/-;T/-;T/-;-/T;T/-;-/T;T/-;T/-;T/-
11	EPB41L1	20	34818695	T	14		1	10	TT/-;T/-;T/-;T/-;T/-;T/-;T/-;T/-;-/T;T/-;TTTT/-
11	CBLN4	20	54572756	A	12		0	11	AA/-;A/-;A/-;AA/-;A/-;A/-;A/-;A/-;A/-;AA/-;AA/-
11	TFAP2C	20	55213716	T	21		0	11	TT/-;TTTTTTTTT/-;TTTTTTTTT/-;TTTTTT/-;TTT/-;TTTTT/-;TT/-;TTTTT/-;TTTTT/-;TTTTTTTT/-;TTT/-
11	SLC5A3	21	35470292	T	11		1	10	T/-;T/-;T/-;T/-;T/-;T/-;T/-;-/T;T/-;T/-;T/-
11	AGPAT3	21	45405279	A	15		0	11	AAA/-;AA/-;A/-;A/-;A/-;A/-;AA/-;A/-;AAA/-;AAA/-;A/-
11	CSNK1E	22	38686808	T	12		0	11	TTT/-;T/-;T/-;T/-;T/-;T/-;T/-;T/-;TT/-;T/-;T/-
11	TOMM22	22	39079921	T	15		0	11	TTT/-;T/-;TTT/-;TT/-;T/-;T/-;TT/-;TT/-;T/-;TTT/-;TT/-
11	REPS2	X	17169996	T	13		0	11	T/-;T/-;TT/-;T/-;T/-;T/-;TT/-;T/-;T/-;T/-;T/-
11	EIF1AX	X	20145843	T	15		0	11	TT/-;T/-;TT/-;TT/-;TTT/-;TT/-;T/-;T/-;T/-;TTTT/-;T/-
11	ZFX	X	24231795	T	22		3	8	TTTTTTT/-;-/AA;TT/-;TTTT/-;-/AA;TT/-;TTTTT/-;-/A;TTT/-;TTTTTTTTT/-;TTTTTTTTT/-
11	USP9X	X	41093299	T	15		1	10	T/-;T/-;T/-;T/-;T/-;T/-;TTT/-;-/T;TT/-;TT/-;TT/-
11	CASK	X	41379132	A	13		0	11	AA/-;A/-;A/-;A/-;A/-;A/-;A/-;A/-;A/-;AAA/-;AAA/-
11	USP27X	X	49646948	A	20		0	11	AAAAAA/-;AAA/-;AAAA/-;A/-;A/-;A/-;AG/-;AAA/-;AAAAA/-;AAAAAAA/-;AAAAAG/-
10	TMEM57	1	25825932	T	13		2	8	TT/-;T/-;-/T;T/-;T/-;TT/-;-/T;T/-;T/-;TT/-
10	ARID1A	1	27107951	A	12	x	0	10	AA/-;A/-;A/-;AA/-;A/-;A/-;A/-;A/-;AA/-;A/-
10	PUM1	1	31405696	T	11		0	10	T/-;T/-;T/-;T/-;T/-;T/-;T/-;T/-;T/-;T/-
10	KHDRBS1	1	32508537	A	12		0	10	A/-;A/-;A/-;A/-;A/-;AA/-;A/-;A/-;AA/-;AA/-
10	MTF2	1	93602676	A	14		1	9	AA/-;A/-;-/A;A/-;AAA/-;A/-;A/-;A/-;A/-;AA/-
10	MAGI3	1	114226706	T	13		1	9	TTT/-;TT/-;TTT/-;-/T;TT/-;T/-;T/-;TTTT/-;TTT/-;TTTT/-
10	HIPK1	1	114519858	T	14		0	10	TT/-;TT/-;TT/-;T/-;T/-;T/-;T/-;T/-;T/-;TT/-
10	COPA	1	160258928	T	15		0	10	TTTTTT/-;T/-;TT/-;T/-;TTTT/-;TT/-;T/-;TTTT/-;TT/-;TTTTT/-
10	RGS16	1	182569292	T	26		0	10	TTTTTTTTTTTTTTT/-;TTTTTT/-;TTTTTTTTTTTTT/-;TTTTTT/-;TTTTTTTTTT/-;TTTTTTTTTTTTTT/-;TTTTTTTT/-;TTTTTTTTTTTTTT/-;TTTTTTTTTTTTTTT/-;TTTTTTTTTT/-
10	EDEM3	1	184660756	A	14		0	10	AAA/-;AAA/-;A/-;AA/-;A/-;A/-;AAA/-;A/-;AA/-;AAA/-
10	DIEXF	1	210026705	T	15		0	10	TTTT/-;T/-;TT/-;TT/-;TT/-;T/-;T/-;T/-;TTT/-;T/-
10	SIPA1L2	1	232534304	T	14		0	10	TTTT/-;T/-;TTT/-;TT/-;TT/-;TT/-;T/-;TTTT/-;TT/-;TTT/-
10	IRF2BP2	1	234742205	A	13		0	10	A/-;A/-;A/-;AAC/-;A/-;A/-;A/-;A/-;AA/-;AAAA/-
10	RYR2	1	237996514	T	12		0	10	TTT/-;T/-;T/-;TT/-;T/-;T/-;T/-;T/-;TT/-;TT/-
10	CAMKMT	2	44999604	T	16		0	10	TTT/-;T/-;TT/-;T/-;T/-;TT/-;T/-;T/-;TTT/-;TT/-
10	RPIA	2	89049875	A	12		3	7	AA/-;A/-;-/A;A/-;-/A;A/-;-/A;A/-;A/-;A/-
10	CREG2	2	101966203	T	13		0	10	TTT/-;T/-;T/-;T/-;T/-;TT/-;T/-;T/-;TT/-;TT/-
10	TMEM87B	2	112875240	A	11		0	10	A/-;A/-;A/-;A/-;A/-;A/-;A/-;A/-;A/-;AA/-
10	FBLN7	2	112945285	T	11		0	10	T/-;T/-;T/-;T/-;T/-;T/-;TT/-;T/-;T/-;TT/-
10	PRPF40A	2	153512045	T	15		0	10	TTT/-;T/-;TT/-;TT/-;TT/-;TT/-;TT/-;T/-;TT/-;TT/-
10	COL5A2	2	189898206	T	13		1	9	TTT/-;T/-;TT/-;T/-;-/T;TT/-;T/-;TT/-;TT/-;TTT/-
10	FAM126B	2	201844252	A	11		0	10	A/-;A/-;A/-;A/-;A/-;A/-;A/-;AA/-;AAA/-;AA/-
10	ERBB4	2	212243953	T	11		0	10	TTT/-;TT/-;T/-;T/-;T/-;T/-;T/-;T/-;T/-;T/-
10	CMTM6	3	32523863	A	12		0	10	AA/-;A/-;A/-;A/-;A/-;A/-;A/-;A/-;AA/-;AA/-
10	CCDC66,FAM208A	3	56655847	A	19		0	10	AA/-;AAAAAA/-;AAAA/-;AGTA/-;A/-;AA/-;AAAAAA/-;AAA/-;AAA/-;AAAAA/-
10	GSK3B	3	119542767	A	11		0	10	A/-;A/-;A/-;A/-;A/-;A/-;A/-;A/-;A/-;A/-
10	CCDC14	3	123632519	A	16		0	10	AAAAAA/-;AA/-;AAA/-;AAA/-;AA/-;A/-;AA/-;AAAAAA/-;AA/-;AAAAA/-
10	PPP2R3A	3	135865827	T	11		0	10	TT/-;T/-;T/-;T/-;T/-;T/-;TT/-;T/-;T/-;TT/-
10	SLC7A14	3	170178474	A	12		0	10	A/-;AA/-;A/-;AA/-;A/-;A/-;A/-;A/-;A/-;A/-
10	ACAP2	3	194998813	A	17		0	10	AAAAA/-;AA/-;AAAAA/-;GAAA/-;AA/-;AAA/-;AAA/-;AA/-;AAAA/-;AAAAAAA/-
10	DRD5	4	9785355	A	11		0	10	A/-;A/-;A/-;A/-;A/-;A/-;AA/-;AA/-;AA/-;A/-
10	HS3ST1	4	11400431	T	13		0	10	TTT/-;TT/-;T/-;TT/-;TT/-;T/-;TTT/-;T/-;TT/-;TT/-
10	MED28	4	17626083	T	11		1	9	T/-;T/-;T/-;T/-;T/-;TT/-;T/-;-/T;T/-;T/-
10	TMEM33	4	41959615	T	14		0	10	TT/-;T/-;TT/-;T/-;T/-;T/-;T/-;TT/-;TTTT/-;T/-
10	EMCN	4	101318100	T	12		0	10	TT/-;T/-;TTT/-;TT/-;T/-;T/-;T/-;T/-;TT/-;T/-
10	LRAT	4	155673738	A	10		0	10	AA/-;A/-;A/-;A/-;A/-;A/-;A/-;A/-;A/-;A/-
10	SH3RF1	4	170017406	A	14		0	10	AAAAA/-;A/-;AA/-;AA/-;AA/-;A/-;A/-;A/-;AA/-;AAA/-
10	CEP44	4	175238739	T	13		0	10	TTTT/-;T/-;TT/-;T/-;T/-;T/-;T/-;T/-;T/-;T/-
10	NADKD1	5	36194228	A	11		1	9	A/-;-/A;A/-;A/-;A/-;AA/-;A/-;A/-;AA/-;A/-
10	HMGCS1	5	43290195	A	16		0	10	AAAA/-;AA/-;AAAA/-;AA/-;AA/-;A/-;A/-;AA/-;AAAA/-;AA/-
10	TNPO1	5	72204774	A	13		1	9	AA/-;A/-;A/-;A/-;A/-;A/-;A/-;-/A;A/-;A/-
10	FAM172A	5	92953846	T	12		0	10	TT/-;T/-;TT/-;T/-;T/-;T/-;TT/-;T/-;TTT/-;T/-
10	KLHL3	5	136954449	A	15		1	9	AA/-;A/-;AA/-;-/A;A/-;A/-;A/-;A/-;AA/-;AAA/-
10	CDC23	5	137524389	A	11		0	10	AA/-;A/-;A/-;A/-;A/-;A/-;A/-;A/-;A/-;A/-
10	EGR1	5	137804275	A	12		0	10	A/-;A/-;A/-;A/-;A/-;A/-;A/-;A/-;A/-;AA/-
10	PRELID2	5	145139440	T	11		0	10	T/-;T/-;TT/-;T/-;T/-;T/-;T/-;T/-;T/-;T/-
10	GABRA1	5	161324996	A	11		0	10	A/-;A/-;A/-;A/-;A/-;A/-;A/-;A/-;A/-;A/-
10	PXDC1	6	3723316	A	11		1	9	A/-;A/-;A/-;A/-;A/-;A/-;A/-;A/-;A/-;-/A
10	RBM24	6	17292449	A	11		0	10	AAA/-;A/-;A/-;A/-;A/-;A/-;A/-;A/-;A/-;A/-
10	KIAA0319	6	24545757	A	11		0	10	A/-;AAA/-;A/-;AA/-;A/-;A/-;A/-;A/-;A/-;A/-
10	PRR3	6	30531428	T	16		1	9	TTT/-;TTT/-;TTTT/-;TTTTT/-;TTT/-;TT/-;-/T;TTTTT/-;TTTTTT/-;TTTTT/-
10	NFYA	6	41067456	T	14		0	10	TTTT/-;TTT/-;T/-;T/-;TT/-;T/-;T/-;TT/-;TT/-;TTTT/-
10	KIAA0240	6	42836129	A	13		0	10	AA/-;A/-;A/-;A/-;A/-;A/-;AA/-;A/-;AA/-;AAA/-
10	PKHD1	6	51481326	T	15		0	10	TT/-;TTTT/-;TT/-;TTT/-;TTTTT/-;TTT/-;TT/-;TT/-;TT/-;TT/-
10	HCRTR2	6	55147362	T	12		0	10	T/-;TT/-;T/-;T/-;T/-;T/-;T/-;TT/-;T/-;T/-
10	CNR1	6	88853531	A	11		0	10	AA/-;A/-;A/-;A/-;A/-;A/-;A/-;A/-;A/-;A/-
10	SCML4	6	108025851	T	13		0	10	TT/-;TT/-;TT/-;T/-;TTT/-;T/-;T/-;T/-;T/-;TT/-
10	CDK19	6	110931683	T	11		0	10	TTT/-;T/-;TT/-;T/-;TT/-;T/-;T/-;TT/-;TT/-;TT/-
10	CDK19	6	110932989	A	12		3	7	AAA/-;A/-;A/-;-/A;A/-;A/-;AA/-;-/A;AA/-;-/AA
10	ARHGAP18	6	129898732	A	11		0	10	A/-;A/-;AA/-;A/-;A/-;A/-;A/-;A/-;A/-;A/-
10	MAP3K5	6	136878752	T	14		0	10	TTTT/-;TTT/-;TTTT/-;TT/-;T/-;TTT/-;TTT/-;TTT/-;TTT/-;TTT/-
10	UST	6	149398013	T	13		1	9	T/-;T/-;-/T;TT/-;T/-;T/-;T/-;T/-;TTT/-;T/-
10	IYD	6	150719823	T	12		0	10	TTT/-;T/-;T/-;T/-;T/-;T/-;T/-;T/-;TT/-;TT/-
10	HERPUD2	7	35672679	T	14		0	10	TTT/-;TT/-;TT/-;T/-;T/-;T/-;T/-;T/-;T/-;T/-
10	SEPT7	7	35944037	T	11		1	9	T/-;-/T;T/-;T/-;T/-;T/-;T/-;T/-;T/-;T/-
10	SEC61G	7	54819994	A	11		0	10	AA/-;A/-;A/-;A/-;A/-;AA/-;A/-;AA/-;A/-;A/-
10	CD36	7	80306124	T	12		0	10	TT/-;T/-;T/-;T/-;T/-;T/-;T/-;T/-;T/-;T/-
10	SEMA3D	7	84625293	T	13		0	10	T/-;T/-;TTT/-;T/-;T/-;TT/-;T/-;T/-;TT/-;TT/-
10	DNAJB9	7	108213939	T	12		0	10	TTTT/-;T/-;T/-;T/-;T/-;T/-;T/-;T/-;T/-;T/-
10	KIAA1549	7	138519718	A	13	x	1	9	A/-;AA/-;AA/-;-/A;A/-;A/-;AA/-;AA/-;A/-;A/-
10	UBN2	7	138992228	A	15		0	10	A/-;AAA/-;A/-;AA/-;A/-;AAA/-;A/-;AAA/-;AAAA/-;A/-
10	GALNT11	7	151819246	A	14		1	9	AAA/-;A/-;-/A;AA/-;A/-;A/-;A/-;AA/-;AAA/-;A/-
10	MLL3	7	151832597	T	11	x	0	10	T/-;TT/-;T/-;T/-;T/-;T/-;T/-;T/-;TT/-;T/-
10	DPP6	7	154685163	A	28		1	9	TAAAAAAAAAAAA/-;TAAAAAAA/-;TAAAAAA/-;TAAAAAAA/-;TAA/-;-/CAAAAC;AACAG/-;TAAAAAA/-;TAAAAAAAAAAA/-;AAAAAAAAAAAAAAAAAAACAG/-
10	RBM33	7	155569743	T	13		0	10	TTT/-;TT/-;TT/-;T/-;T/-;T/-;T/-;T/-;T/-;TT/-
10	DLGAP2	8	1652940	A	11		0	10	AA/-;A/-;A/-;A/-;A/-;A/-;A/-;A/-;AA/-;A/-
10	ERLIN2	8	37612354	T	12		0	10	T/-;T/-;TT/-;T/-;T/-;T/-;T/-;T/-;T/-;T/-
10	TACC1	8	38705640	A	11		1	9	A/-;A/-;A/-;-/A;A/-;A/-;A/-;A/-;A/-;A/-
10	PLEKHA2	8	38830289	T	13		1	9	TT/-;T/-;-/TT;T/-;T/-;TT/-;T/-;T/-;TTTT/-;T/-
10	THAP1	8	42692468	A	12		0	10	AA/-;A/-;A/-;A/-;A/-;A/-;A/-;A/-;A/-;A/-
10	LYPLA1	8	54959961	T	12		0	10	T/-;T/-;T/-;T/-;T/-;T/-;T/-;T/-;T/-;T/-
10	PI15	8	75766072	T	10		0	10	T/-;T/-;TT/-;T/-;T/-;T/-;T/-;T/-;T/-;T/-
10	OXR1	8	107763508	T	13		0	10	TT/-;TT/-;TT/-;T/-;T/-;T/-;T/-;T/-;TT/-;T/-
10	TRPS1	8	116424408	A	12		2	8	AA/-;A/-;-/A;A/-;-/A;A/-;A/-;A/-;A/-;AAA/-
10	ZHX1	8	124262078	T	22		0	10	TTTTTTTTTTT/-;TTTTTT/-;TTTT/-;TTTTT/-;TTTTT/-;TTTTT/-;TTTTT/-;TTTTTT/-;TTTTTTTTTT/-;TTTTT/-
10	FAM84B	8	127567088	A	13		0	10	AAAA/-;AA/-;A/-;AAA/-;AA/-;A/-;A/-;AA/-;AA/-;AAA/-
10	SYK	9	93658486	A	12	x	1	9	A/-;A/-;AA/-;-/A;A/-;AA/-;A/-;A/-;A/-;A/-
10	XPA	9	100437634	T	10	x	0	10	TT/-;T/-;T/-;T/-;T/-;T/-;T/-;T/-;T/-;TT/-
10	TGFBR1	9	101916381	T	11		0	10	T/-;T/-;T/-;T/-;T/-;T/-;T/-;T/-;T/-;T/-
10	FKTN	9	108402836	A	13		0	10	A/-;AA/-;A/-;A/-;AA/-;A/-;A/-;A/-;AAA/-;A/-
10	PDCL	9	125580851	A	14		0	10	AAA/-;A/-;A/-;AA/-;AA/-;AA/-;A/-;A/-;A/-;A/-
10	ZBTB43	9	129596298	A	11		1	9	AA/-;A/-;A/-;A/-;A/-;A/-;A/-;-/A;A/-;A/-
10	ODF2	9	131262969	T	13		1	9	TTT/-;T/-;TT/-;T/-;T/-;T/-;-/T;TT/-;T/-;TT/-
10	RXRA	9	137331938	A	12		1	9	AA/-;AAA/-;A/-;-/A;A/-;A/-;A/-;AA/-;A/-;A/-
10	FAM107B	10	14561158	T	12		1	9	TT/-;T/-;-/T;T/-;T/-;T/-;T/-;TT/-;T/-;T/-
10	A1CF	10	52566433	T	12		1	9	T/-;TT/-;T/-;T/-;-/T;TT/-;T/-;T/-;T/-;TT/-
10	CISD1	10	60048286	T	11		0	10	T/-;T/-;T/-;T/-;T/-;T/-;TT/-;T/-;T/-;T/-
10	TMEM26	10	63166726	A	12		0	10	AA/-;AA/-;A/-;A/-;A/-;A/-;A/-;AA/-;A/-;A/-
10	VPS26A	10	70931261	T	11		0	10	T/-;T/-;T/-;T/-;T/-;T/-;T/-;T/-;T/-;T/-
10	GLUD1	10	88810338	A	15		0	10	AA/-;A/-;AA/-;A/-;A/-;AAAA/-;A/-;A/-;A/-;A/-
10	PAPSS2	10	89507277	A	11		1	9	A/-;AC/-;A/-;AC/-;A/-;A/-;-/A;A/-;A/-;AAC/-
10	GRK5	10	121215052	A	13		0	10	A/-;A/-;A/-;A/-;A/-;A/-;A/-;AAA/-;AAA/-;A/-
10	FAM196A	10	128934743	A	15		0	10	AAAAA/-;AAAAA/-;AAA/-;A/-;A/-;AA/-;AAA/-;AAAAA/-;AA/-;AAAAAA/-
10	TRIM66	11	8635431	A	9		0	10	A/-;A/-;A/-;AA/-;A/-;A/-;A/-;AA/-;A/-;AA/-
10	SOX6	11	15988220	A	11		1	9	A/-;A/-;-/A;A/-;A/-;A/-;A/-;A/-;A/-;A/-
10	ZDHHC13	11	19197720	A	10		0	10	A/-;A/-;A/-;A/-;A/-;A/-;A/-;A/-;A/-;A/-
10	RAG1	11	36601097	T	12		0	10	TT/-;TT/-;TTT/-;T/-;TTT/-;T/-;T/-;T/-;TTT/-;TT/-
10	MS4A7	11	60161439	A	12		0	10	A/-;A/-;AA/-;A/-;A/-;A/-;A/-;AA/-;A/-;A/-
10	ZBTB3	11	62519423	A	12		0	10	AA/-;AA/-;A/-;A/-;A/-;A/-;A/-;A/-;A/-;AAA/-
10	GAL	11	68458593	T	12		1	9	TT/-;T/-;T/-;T/-;T/-;TT/-;-/T;T/-;T/-;TT/-
10	FCHSD2	11	72549650	A	10		2	8	AA/-;A/-;A/-;AA/-;-/A;A/-;-/A;A/-;A/-;A/-
10	NAALAD2	11	89925063	T	10		2	8	T/-;T/-;-/T;-/T;T/-;T/-;T/-;T/-;T/-;T/-
10	C11orf87	11	109296013	A	12		1	9	AA/-;A/-;AA/-;A/-;A/-;A/-;A/-;A/-;A/-;-/A
10	MLL	11	118395426	A	12	x	0	10	AA/-;A/-;A/-;A/-;A/-;A/-;A/-;A/-;A/-;A/-
10	FLI1	11	128681587	T	15	x	0	10	T/-;T/-;T/-;TT/-;T/-;T/-;T/-;T/-;TT/-;T/-
10	CCND2	12	4410639	T	16	x	1	9	TT/-;T/-;TTTT/-;T/-;TT/-;TT/-;T/-;T/-;-/T;T/-
10	ZNF384	12	6775801	A	16	x	0	10	AAA/-;AA/-;A/-;A/-;A/-;A/-;A/-;AA/-;AAA/-;A/-
10	ETV6	12	12045438	T	14	x	0	10	T/-;T/-;T/-;T/-;T/-;T/-;T/-;T/-;TT/-;T/-
10	ERGIC2	12	29493723	T	11		1	9	T/-;T/-;T/-;-/T;TT/-;T/-;T/-;T/-;TT/-;T/-
10	FAM60A	12	31435609	T	11		0	10	T/-;T/-;T/-;T/-;T/-;T/-;TT/-;T/-;T/-;T/-
10	DENND5B	12	31535651	T	12		0	10	TT/-;T/-;T/-;T/-;T/-;T/-;T/-;T/-;TT/-;TT/-
10	H3F3C	12	31944218	T	12		1	9	T/-;T/-;T/-;T/-;TT/-;T/-;-/T;T/-;TT/-;T/-
10	PPHLN1	12	42835329	A	15		0	10	A/-;AAAA/-;AAA/-;AA/-;AAA/-;A/-;A/-;AA/-;AAAA/-;AAAA/-
10	KRT8	12	53291008	A	11		0	10	A/-;A/-;A/-;A/-;A/-;A/-;A/-;A/-;AA/-;AA/-
10	CDK2	12	56366446	A	11		0	10	A/-;A/-;A/-;A/-;A/-;A/-;A/-;A/-;A/-;AA/-
10	SMARCC2	12	56556168	A	14		1	9	A/-;A/-;A/-;A/-;A/-;-/A;A/-;A/-;A/-;AA/-
10	METTL21B	12	58175146	T	15		0	10	TT/-;T/-;T/-;T/-;T/-;TT/-;TTT/-;TT/-;T/-;T/-
10	RASSF3	12	65088986	T	11		1	9	T/-;TT/-;T/-;TT/-;T/-;T/-;T/-;TT/-;-/T;T/-
10	ATP2B1	12	89984602	T	12		0	10	T/-;T/-;T/-;T/-;T/-;T/-;T/-;T/-;T/-;TT/-
10	NEDD1	12	97346988	A	13		1	9	AA/-;A/-;-/A;A/-;A/-;A/-;A/-;A/-;AA/-;A/-
10	BRAP	12	112080130	T	12		0	10	T/-;T/-;TT/-;T/-;T/-;T/-;T/-;T/-;T/-;T/-
10	TAOK3	12	118587725	T	11		0	10	T/-;T/-;T/-;TT/-;T/-;T/-;T/-;T/-;T/-;TT/-
10	BCL7A	12	122498800	A	12	x	1	9	A/-;A/-;A/-;-/A;A/-;AAA/-;A/-;AAA/-;AA/-;AAA/-
10	FLT1	13	28875310	A	14		0	10	A/-;A/-;AA/-;AA/-;AA/-;A/-;A/-;A/-;AAA/-;AA/-
10	UFM1	13	38935215	T	11		1	9	TT/-;-/T;T/-;T/-;T/-;T/-;T/-;T/-;TT/-;T/-
10	NEK5	13	52639269	A	13		1	9	AA/-;A/-;A/-;-/AA;A/-;A/-;AA/-;A/-;AA/-;AA/-
10	PCDH9	13	66878393	A	26		1	9	AAAAAAAAAAAAAAAA/-;AAAAAAAAA/-;AAAAAAAAAAA/-;AAAA/-;-/A;AAAAAAAAA/-;AAAAAAAAAAA/-;AAAAAAAAAAA/-;AAAAAAAAAAAAA/-;AAAAAAAAAAAAAAA/-
10	ARHGAP5	14	32627035	T	11		3	7	T/-;T/-;T/-;T/-;T/-;-/T;-/T;T/-;-/T;T/-
10	SNAPC1	14	62262576	T	12		0	10	T/-;T/-;TT/-;T/-;T/-;T/-;TT/-;T/-;T/-;TT/-
10	EIF2S1	14	67851085	T	13		0	10	TTT/-;TTT/-;T/-;TT/-;T/-;T/-;T/-;TT/-;TTT/-;T/-
10	RBM25	14	73586614	T	12		0	10	TTT/-;T/-;TT/-;T/-;T/-;TT/-;TT/-;T/-;T/-;T/-
10	FLRT2	14	86090075	A	12		1	9	AA/-;A/-;AA/-;A/-;A/-;A/-;A/-;-/A;A/-;A/-
10	CALM1	14	90872490	T	13		0	10	TT/-;T/-;TT/-;TT/-;TT/-;TT/-;T/-;TT/-;TTT/-;TT/-
10	TRIP11	14	92435634	A	12	x	0	10	AA/-;A/-;AA/-;A/-;AA/-;A/-;A/-;AA/-;A/-;AA/-
10	BTBD7	14	93708031	A	10		0	10	A/-;A/-;A/-;A/-;A/-;A/-;A/-;A/-;A/-;A/-
10	RASGRP1	15	38781451	T	13		0	10	T/-;TTT/-;TT/-;TT/-;T/-;TT/-;T/-;TT/-;T/-;TT/-
10	DUT	15	48634320	A	15		1	9	AA/-;A/-;AAA/-;A/-;AA/-;A/-;A/-;A/-;A/-;-/A
10	RORA	15	60788654	A	12		0	10	AA/-;A/-;AAA/-;A/-;A/-;AA/-;A/-;A/-;AA/-;AAA/-
10	DPP8	15	65738043	A	11		0	10	A/-;A/-;A/-;A/-;A/-;A/-;A/-;A/-;AA/-;A/-
10	SMAD3	15	67486033	T	13		0	10	TTT/-;TTTT/-;T/-;T/-;T/-;T/-;T/-;T/-;TT/-;T/-
10	TLE3	15	70340968	A	11		1	9	A/-;A/-;A/-;-/A;A/-;A/-;A/-;A/-;A/-;A/-
10	WHAMM	15	83502439	T	14		0	10	TTT/-;TT/-;TT/-;TTT/-;T/-;TTT/-;TT/-;T/-;TTT/-;TTT/-
10	NR2F2	15	96882326	A	11		0	10	A/-;A/-;A/-;A/-;A/-;AA/-;A/-;A/-;A/-;AA/-
10	HN1L	16	1751590	T	11		1	9	TT/-;-/T;T/-;T/-;T/-;T/-;T/-;T/-;T/-;TT/-
10	NDE1	16	15818992	A	15		0	10	AAAC/-;AA/-;AA/-;A/-;A/-;AA/-;AAAA/-;AAAAAC/-;AAA/-;AAAA/-
10	CHD9	16	53360783	A	14		0	10	A/-;AA/-;A/-;A/-;A/-;A/-;AA/-;AA/-;A/-;AA/-
10	RAP1GAP2	17	2938272	T	17		1	9	TTTTTT/-;TTTTT/-;TTT/-;TTT/-;TTTT/-;TTTT/-;-/TTT;TTTT/-;TTTTTT/-;T/-
10	CD68	17	7485330	C	16		0	10	CCCCCCC/-;CCCCC/-;CCCCC/-;CCCCC/-;CCCCC/-;CCCCCCC/-;CCCCC/-;CCCCCC/-;CCCCCC/-;CCCC/-
10	COX10	17	14110669	T	14		2	8	T/-;TTT/-;T/-;T/-;T/-;-/T;-/T;T/-;T/-;T/-
10	NPEPPS	17	45699792	T	13		0	10	TT/-;T/-;TT/-;TT/-;T/-;T/-;TTT/-;T/-;T/-;TTT/-
10	IGF2BP1	17	47129196	T	12		1	9	TT/-;TT/-;T/-;T/-;T/-;T/-;TT/-;-/T;T/-;T/-
10	VEZF1	17	56049541	T	11		2	8	T/-;T/-;TT/-;T/-;-/T;T/-;-/T;TT/-;TTT/-;T/-
10	VAPA	18	9959719	A	26		0	10	AAAAAAAAAAA/-;AAAAAAA/-;AAAAAAAAA/-;AAAAA/-;AAAAAAAAAA/-;AAAAAAAA/-;AAAAAAAAAAAAAA/-;AAAAAAAAAAAAAA/-;AAAAAAAAAAA/-;AAAAAAAAAAAA/-
10	ZNF521	18	22642387	T	13	x	0	10	TT/-;T/-;T/-;T/-;T/-;T/-;T/-;T/-;TT/-;T/-
10	TAF4B	18	23971177	A	14		1	9	A/-;AA/-;A/-;-/A;A/-;A/-;A/-;AA/-;AAA/-;A/-
10	SETBP1	18	42644774	A	17	x	0	10	A/-;AA/-;AAA/-;AA/-;A/-;AAA/-;A/-;A/-;A/-;AAAAA/-
10	IER3IP1	18	44682386	A	11		0	10	A/-;A/-;AA/-;A/-;AA/-;A/-;A/-;A/-;AA/-;A/-
10	MYO5B	18	47351785	A	12		1	9	AA/-;A/-;-/A;A/-;A/-;AA/-;A/-;AA/-;AA/-;AA/-
10	SMAD4	18	48606336	T	14		1	9	TTT/-;T/-;TTT/-;T/-;TT/-;TT/-;T/-;T/-;TTT/-;-/T
10	ZNF407	18	72516096	T	11		0	10	T/-;TT/-;T/-;T/-;T/-;TT/-;T/-;T/-;T/-;T/-
10	TSHZ1	18	73001027	A	12		0	10	AA/-;A/-;A/-;A/-;A/-;A/-;A/-;AA/-;AA/-;A/-
10	ADNP2	18	77898163	T	12		1	9	T/-;T/-;TT/-;T/-;TT/-;T/-;TT/-;T/-;-/T;TT/-
10	ZBTB7A	19	4046572	T	11		0	10	TT/-;T/-;TT/-;T/-;T/-;T/-;T/-;TT/-;T/-;T/-
10	ZNF461	19	37128585	A	14		1	9	A/-;A/-;AAA/-;A/-;AA/-;A/-;A/-;-/A;AA/-;A/-
10	ZNF585A	19	37641651	A	13		0	10	AA/-;A/-;AA/-;AA/-;A/-;A/-;A/-;A/-;A/-;AA/-
10	ZNF576	19	44103642	A	12		0	10	A/-;A/-;A/-;A/-;A/-;A/-;A/-;A/-;A/-;AA/-
10	CARD8	19	48714480	A	12		0	10	A/-;AAAA/-;A/-;A/-;A/-;A/-;AA/-;A/-;AA/-;AAA/-
10	ZNF549	19	58050716	T	14		0	10	TTTT/-;T/-;TT/-;T/-;T/-;TTT/-;T/-;TTT/-;TT/-;TTT/-
10	POFUT1	20	30826324	A	11		1	9	A/-;A/-;A/-;A/-;A/-;-/A;A/-;A/-;A/-;A/-
10	PMEPA1	20	56226892	T	11		0	10	T/-;T/-;T/-;T/-;T/-;T/-;T/-;T/-;T/-;T/-
10	IFNGR2	21	34809434	T	13		0	10	TT/-;T/-;T/-;T/-;T/-;T/-;TT/-;T/-;TT/-;T/-
10	TNRC6B	22	40720867	T	14		0	10	TT/-;TTT/-;T/-;TT/-;T/-;T/-;TTTTT/-;TTT/-;TTT/-;TTTT/-
10	CLCN4	X	10204764	T	13		0	10	TT/-;TTT/-;TT/-;T/-;T/-;TTTT/-;TT/-;T/-;TTT/-;TTT/-
10	SCML1	X	17771801	A	13		0	10	A/-;AA/-;AA/-;A/-;AA/-;A/-;AAA/-;A/-;AA/-;AAAA/-
10	CDK16	X	47088663	T	13		0	10	TTT/-;TTT/-;TT/-;TTT/-;TT/-;T/-;T/-;T/-;TTT/-;TT/-
10	DLG3	X	69722275	T	13		0	10	T/-;T/-;T/-;T/-;TT/-;T/-;T/-;T/-;T/-;T/-
10	ZCCHC5	X	77911814	A	12		0	10	A/-;A/-;A/-;A/-;A/-;A/-;A/-;A/-;A/-;A/-
10	KLHL4	X	86922592	A	13		1	9	A/-;A/-;AAA/-;A/-;-/A;A/-;AA/-;A/-;AAAA/-;AA/-
10	MCTS1	X	119754488	A	14		0	10	AAA/-;AA/-;AA/-;A/-;A/-;A/-;A/-;AAAA/-;A/-;A/-
10	DUSP9	X	152916313	T	12		0	10	TT/-;T/-;TT/-;T/-;T/-;T/-;T/-;T/-;T/-;T/-
9	HNRNPR	1	23636875	T	11		0	9	T/-;T/-;T/-;T/-;T/-;T/-;T/-;T/-;T/-
9	PDIK1L	1	26449668	T	15		0	9	TTTTT/-;TT/-;T/-;TTT/-;TTT/-;T/-;TT/-;TT/-;TT/-
9	KHDRBS1	1	32508884	A	11		0	9	A/-;AA/-;A/-;A/-;A/-;AA/-;A/-;A/-;A/-
9	AKIRIN1	1	39471673	A	10		0	9	A/-;A/-;A/-;A/-;A/-;A/-;A/-;A/-;A/-
9	EPS15	1	51822220	A	12	x	0	9	AA/-;AA/-;AA/-;A/-;A/-;A/-;A/-;AAA/-;AA/-
9	SSBP3	1	54692320	T	12		0	9	TT/-;TT/-;TT/-;TT/-;T/-;T/-;T/-;TTT/-;TT/-
9	ELTD1	1	79356180	T	14		1	8	T/-;TTT/-;TT/-;T/-;TT/-;T/-;-/T;TTT/-;TT/-
9	TGFBR3	1	92147603	A	11		0	9	A/-;A/-;A/-;A/-;A/-;A/-;A/-;A/-;AA/-
9	SORT1	1	109856086	A	13		0	9	A/-;A/-;AA/-;A/-;A/-;A/-;A/-;A/-;AA/-
9	CEPT1	1	111727470	T	22		0	9	TT/-;TTTTT/-;TTTTT/-;TT/-;T/-;TTTTTT/-;TTTT/-;TTTTTTT/-;TTTTTTT/-
9	ST7L	1	113067471	A	10		0	9	A/-;A/-;A/-;A/-;A/-;A/-;A/-;A/-;A/-
9	SLC16A1	1	113455428	A	13		0	9	AA/-;AA/-;A/-;AA/-;AA/-;A/-;A/-;A/-;A/-
9	LRIG2	1	113667283	T	11		0	9	TT/-;T/-;T/-;T/-;T/-;T/-;T/-;T/-;T/-
9	FAM46C	1	118167728	T	12	x	0	9	TT/-;TT/-;T/-;TT/-;T/-;T/-;T/-;T/-;T/-
9	ARNT	1	150783109	A	18	x	0	9	A/-;AA/-;A/-;A/-;A/-;A/-;A/-;A/-;A/-
9	SNX27	1	151666827	T	11		0	9	T/-;T/-;T/-;T/-;T/-;T/-;T/-;TT/-;TT/-
9	RGS5	1	163116031	T	17		0	9	T/-;TTT/-;TTT/-;T/-;TT/-;T/-;T/-;T/-;TT/-
9	RNF2	1	185070965	T	22		1	8	TTTTTTTTTTT/-;T/-;-/TTTT;TTTTT/-;TTT/-;TT/-;TTTTTT/-;TTTTTTT/-;TTTTTTT/-
9	TROVE2	1	193053997	A	12		0	9	A/-;A/-;A/-;A/-;A/-;A/-;AA/-;AA/-;A/-
9	CDC73	1	193220975	T	12		1	8	TTT/-;T/-;T/-;TT/-;T/-;T/-;-/T;T/-;TT/-
9	PIK3C2B	1	204393466	A	12		1	8	AAAA/-;A/-;A/-;-/A;A/-;A/-;A/-;A/-;A/-
9	NUCKS1	1	205683627	A	10		0	9	A/-;A/-;A/-;A/-;A/-;A/-;A/-;A/-;A/-
9	NUCKS1	1	205687214	A	19		0	9	AAA/-;A/-;AAG/-;AA/-;AA/-;A/-;AAAA/-;AG/-;AAG/-
9	RAB3GAP2	1	220323794	T	20		0	9	TTTTTTTTT/-;TTT/-;TT/-;TT/-;TTT/-;TTT/-;TTTT/-;TTTTT/-;TTTTTT/-
9	DUSP10	1	221875662	A	11		0	9	AA/-;A/-;A/-;A/-;AA/-;A/-;A/-;A/-;A/-
9	ZNF238	1	244220230	T	10		0	9	T/-;T/-;T/-;T/-;T/-;T/-;T/-;T/-;T/-
9	ATAD2B	2	23972042	A	12		0	9	AA/-;A/-;A/-;AA/-;A/-;AA/-;AA/-;AA/-;A/-
9	C2orf44	2	24253008	A	13	x	2	7	AA/-;A/-;-/A;A/-;A/-;A/-;A/-;A/-;-/A
9	PPP1CB	2	29024299	T	14		1	8	TT/-;TT/-;TT/-;T/-;-/T;TT/-;TTT/-;TTT/-;TTTT/-
9	ACTR2	2	65498036	A	12		0	9	AA/-;AA/-;A/-;A/-;A/-;A/-;A/-;A/-;A/-
9	GCFC2	2	75890031	A	16		0	9	AAAAA/-;AAA/-;AA/-;A/-;A/-;AA/-;AAAAA/-;AAAAA/-;AAA/-
9	LRRTM4	2	77745256	A	15		1	8	AAAA/-;A/-;AAA/-;AA/-;-/A;A/-;A/-;A/-;AAA/-
9	TSGA10	2	99614596	A	13		0	9	AA/-;A/-;A/-;A/-;A/-;A/-;A/-;A/-;A/-
9	LONRF2	2	100898348	T	12		0	9	TT/-;T/-;T/-;T/-;T/-;T/-;T/-;T/-;T/-
9	TTL	2	113289265	A	11	x	1	8	A/-;A/-;A/-;A/-;A/-;A/-;-/A;A/-;A/-
9	CCDC93	2	118675892	A	11		0	9	AA/-;A/-;A/-;A/-;A/-;AA/-;A/-;A/-;A/-
9	STEAP3	2	120023164	T	12		0	9	T/-;T/-;T/-;TT/-;T/-;T/-;T/-;T/-;TT/-
9	POLR2D	2	128604218	A	15		0	9	AAAA/-;AA/-;A/-;A/-;A/-;AAA/-;AAA/-;A/-;AAA/-
9	ACVR1C	2	158387582	T	14		0	9	T/-;T/-;TTT/-;TT/-;T/-;T/-;T/-;TT/-;T/-
9	RBMS1	2	161128990	T	13		0	9	TTT/-;T/-;TTT/-;TT/-;T/-;TTT/-;T/-;T/-;T/-
9	DCAF17	2	172339179	T	11		0	9	T/-;T/-;T/-;TT/-;T/-;T/-;T/-;TTT/-;T/-
9	ITGA6	2	173368990	A	11		0	9	A/-;A/-;A/-;A/-;A/-;A/-;A/-;A/-;A/-
9	RBM45	2	178994206	T	11		1	8	T/-;T/-;-/T;T/-;TTT/-;T/-;T/-;T/-;T/-
9	GLS	2	191828630	T	12		1	8	T/-;T/-;T/-;-/T;T/-;T/-;T/-;T/-;TTTT/-
9	STAT1	2	191840353	T	15		1	8	TT/-;T/-;T/-;TT/-;TT/-;T/-;-/T;TT/-;TTTT/-
9	FAM126B	2	201838934	A	13		0	9	AAA/-;A/-;A/-;A/-;A/-;A/-;A/-;A/-;A/-
9	ICA1L	2	203641768	T	28		0	9	TTTTTTTTTTTT/-;TTTTT/-;TTTTTT/-;TTTTTTTTTTT/-;TTTTTTTT/-;TTTTTTT/-;TTTTTT/-;TTT/-;TTTTTTTTTT/-
9	EPHA4	2	222290624	T	11		2	7	T/-;-/T;T/-;TT/-;T/-;-/T;T/-;T/-;T/-
9	COPS7B	2	232673379	T	13		1	8	T/-;T/-;TT/-;-/T;T/-;T/-;T/-;T/-;TT/-
9	LHFPL4	3	9543423	A	13		1	8	AA/-;AA/-;A/-;A/-;A/-;-/A;A/-;A/-;A/-
9	CRTAP	3	33187521	A	12		1	8	A/-;A/-;A/-;-/A;A/-;A/-;A/-;A/-;AA/-
9	ZNF621	3	40575422	A	11		0	9	A/-;A/-;A/-;A/-;A/-;A/-;A/-;AA/-;A/-
9	QRICH1	3	49067296	A	12		1	8	AA/-;AA/-;A/-;AAA/-;AA/-;-/A;AA/-;AA/-;A/-
9	DCP1A	3	53321361	T	27		0	9	TTTTTG/-;TTTTT/-;TTTTTG/-;TTTTTTTTT/-;TTTTTT/-;TTTTTTTTTT/-;TTTTG/-;TTTTTTTTTTT/-;TTTTTTTTTTT/-
9	FAM116A	3	57611368	A	11		0	9	A/-;A/-;A/-;A/-;A/-;A/-;A/-;A/-;A/-
9	CADPS	3	62384482	T	10		1	8	T/-;T/-;T/-;T/-;-/T;T/-;T/-;T/-;T/-
9	PROK2	3	71821523	A	14		1	8	AA/-;-/A;AA/-;AA/-;AA/-;AA/-;AAA/-;A/-;A/-
9	PROK2	3	71821711	A	15		0	9	AAAA/-;A/-;A/-;AAA/-;A/-;AA/-;AAA/-;AAAA/-;AAA/-
9	RYBP	3	72424550	T	9		2	7	T/-;-/T;T/-;T/-;T/-;T/-;T/-;T/-;-/T
9	EPHA3	3	89448877	T	12		2	7	TTT/-;TT/-;T/-;-/TA;T/-;T/-;-/ATTTG;TT/-;T/-
9	DCBLD2	3	98516120	A	13		0	9	AAA/-;A/-;A/-;AA/-;A/-;A/-;AA/-;AAA/-;A/-
9	ZXDC	3	126179926	T	11		0	9	TT/-;T/-;T/-;T/-;T/-;T/-;T/-;T/-;T/-
9	MSL2	3	135867962	A	15		1	8	AAAAA/-;AAA/-;AA/-;-/A;A/-;A/-;A/-;AA/-;A/-
9	FOXL2	3	138663654	T	13	x	1	8	TT/-;T/-;TTT/-;T/-;T/-;T/-;-/T;T/-;TT/-
9	PRR23A	3	138723893	A	9		0	9	A/-;A/-;A/-;A/-;A/-;A/-;A/-;A/-;A/-
9	C3orf58	3	143709142	T	11		0	9	T/-;T/-;TT/-;T/-;T/-;T/-;T/-;T/-;T/-
9	PLCH1	3	155197738	A	12		1	8	A/-;A/-;AAA/-;A/-;-/A;A/-;A/-;AA/-;A/-
9	SLITRK3	3	164905649	A	11		2	7	A/-;A/-;A/-;-/AA;A/-;-/A;A/-;A/-;A/-
9	MAP3K13	3	185200600	A	11		2	7	A/-;A/-;-/A;A/-;-/A;A/-;A/-;A/-;A/-
9	BOD1L	4	13570454	A	11		0	9	A/-;A/-;A/-;A/-;A/-;A/-;A/-;A/-;A/-
9	DCAF16	4	17802760	T	12		1	8	TT/-;T/-;-/T;T/-;TTT/-;T/-;TTT/-;T/-;T/-
9	RELL1	4	37613353	A	12		0	9	AA/-;A/-;A/-;A/-;A/-;A/-;AA/-;AA/-;A/-
9	FRYL	4	48500089	T	15		0	9	TTT/-;T/-;TT/-;T/-;T/-;T/-;TTT/-;T/-;TTT/-
9	SCFD2	4	53739938	T	17		0	9	TTTT/-;TT/-;T/-;TTT/-;T/-;T/-;TTT/-;TT/-;T/-
9	ENAM	4	71511777	T	15		0	9	TTTTT/-;T/-;TT/-;T/-;T/-;TT/-;TT/-;TTTT/-;TTTTT/-
9	SCD5	4	83552279	A	11		2	7	A/-;AA/-;A/-;-/A;A/-;-/A;AA/-;A/-;A/-
9	BMPR1B	4	96077806	A	12		1	8	A/-;A/-;AA/-;-/AAA;A/-;A/-;A/-;AA/-;A/-
9	RAP1GDS1	4	99364167	T	23	x	0	9	TTTTTTTTTTT/-;TTT/-;TTTTTTTTT/-;TTTTT/-;TT/-;TTTTTTTT/-;TTTTTTT/-;TTTTTTTTT/-;TTTTTTT/-
9	ANK2	4	114303783	T	11		1	8	T/-;T/-;T/-;T/-;T/-;T/-;T/-;-/T;T/-
9	C4orf49	4	140187662	T	11		1	8	T/-;-/T;T/-;T/-;T/-;T/-;T/-;T/-;T/-
9	PDGFC	4	157683778	A	17		1	8	AAAAA/-;AAA/-;AA/-;AAA/-;-/A;AA/-;AA/-;A/-;AAAAA/-
9	CBR4	4	169911113	A	13		0	9	AAA/-;A/-;A/-;A/-;A/-;AA/-;A/-;A/-;AA/-
9	SH3RF1	4	170016067	A	11		0	9	A/-;A/-;A/-;A/-;A/-;A/-;A/-;A/-;A/-
9	GALNT7	4	174244279	A	13		1	8	AA/-;A/-;A/-;-/A;A/-;A/-;AA/-;AAAA/-;A/-
9	LPCAT1	5	1463125	A	11		1	8	A/-;-/A;A/-;A/-;A/-;A/-;A/-;A/-;AA/-
9	SLC30A5	5	68399960	T	11		0	9	T/-;T/-;T/-;T/-;T/-;T/-;TT/-;T/-;T/-
9	HAPLN1	5	82936729	T	17		0	9	TTTT/-;T/-;TTTT/-;T/-;T/-;T/-;TT/-;T/-;TT/-
9	LIX1	5	96429324	A	21		0	9	AAAAAAAA/-;AAA/-;AAAAAA/-;AAA/-;AAA/-;AAA/-;AAAAAAAA/-;AAAAAA/-;AAAAAAAAA/-
9	DCP2	5	112351059	T	11		0	9	TT/-;T/-;T/-;T/-;TT/-;T/-;T/-;T/-;TTT/-
9	SEMA6A	5	115779929	A	13		3	6	A/-;A/-;-/A;A/-;AA/-;A/-;-/A;A/-;-/A
9	SLC12A2	5	127523982	T	24		0	9	TTTTTTTT/-;TTTT/-;TTTTTT/-;TTTTT/-;TTT/-;TTTT/-;TTTTTTTTT/-;TTTTTTTTTT/-;TTTTTTTT/-
9	PCBD2	5	134296981	T	14		0	9	TTT/-;T/-;TT/-;T/-;TT/-;TT/-;T/-;TT/-;TTTT/-
9	FAM13B	5	137274916	A	11		1	8	A/-;A/-;A/-;A/-;-/A;A/-;A/-;A/-;AA/-
9	NDFIP1	5	141533174	T	11		0	9	T/-;T/-;TT/-;T/-;T/-;T/-;T/-;TT/-;T/-
9	LARP1	5	154194460	A	16		0	9	AAA/-;AA/-;AA/-;AAA/-;AA/-;AAAA/-;A/-;AAAA/-;AAA/-
9	GABRG2	5	161581835	A	11		1	8	A/-;A/-;-/A;A/-;A/-;A/-;A/-;A/-;A/-
9	CANX	5	179155908	T	12		0	9	T/-;TTT/-;T/-;T/-;T/-;T/-;T/-;T/-;T/-
9	HUS1B	6	656080	A	10		0	9	A/-;A/-;A/-;A/-;A/-;A/-;A/-;A/-;A/-
9	MAK	6	10764373	T	9		1	8	T/-;T/-;-/T;T/-;T/-;T/-;T/-;T/-;T/-
9	CAP2	6	17556927	A	11		0	9	A/-;A/-;A/-;A/-;A/-;A/-;A/-;A/-;A/-
9	SOX4	6	21596501	A	12		0	9	AA/-;A/-;AA/-;A/-;AA/-;A/-;A/-;AA/-;A/-
9	FKBP5	6	35554625	T	12		0	9	T/-;T/-;TT/-;T/-;T/-;T/-;TT/-;TT/-;TT/-
9	CLIC5	6	45869505	T	10		0	9	T/-;T/-;T/-;T/-;T/-;T/-;T/-;T/-;T/-
9	LRRC1	6	53787794	T	14		0	9	TTT/-;TT/-;TT/-;TT/-;T/-;T/-;TT/-;T/-;TT/-
9	PTP4A1	6	64290634	T	15		0	9	TTTT/-;TT/-;T/-;TT/-;T/-;TTT/-;TTT/-;TT/-;TTT/-
9	SMAP1	6	71571695	A	12		1	8	AA/-;AA/-;-/A;A/-;A/-;AAA/-;AA/-;AA/-;A/-
9	RRAGD	6	90076342	A	13		0	9	AA/-;A/-;A/-;A/-;AA/-;AAA/-;A/-;A/-;AA/-
9	LACE1	6	108844117	T	11		1	8	T/-;-/TT;TT/-;TT/-;T/-;T/-;T/-;T/-;TT/-
9	MARCKS	6	114182373	A	13		0	9	AAA/-;A/-;A/-;A/-;A/-;AA/-;A/-;AAA/-;AA/-
9	ENPP1	6	132212889	T	19		0	9	TTTTTT/-;TTTTT/-;TTTT/-;T/-;TT/-;TTT/-;TTT/-;TTTTTT/-;TTTTTT/-
9	ALDH8A1	6	135238908	T	10		0	9	T/-;T/-;T/-;T/-;T/-;T/-;T/-;T/-;T/-
9	TNFAIP3	6	138204004	A	12	x	0	9	AA/-;AA/-;A/-;AA/-;AA/-;A/-;A/-;AA/-;A/-
9	PHACTR2	6	144145916	A	13		1	8	AAA/-;A/-;A/-;A/-;AAA/-;A/-;-/A;A/-;A/-
9	PHACTR2	6	144151004	T	10		1	8	T/-;T/-;-/T;T/-;T/-;T/-;T/-;T/-;T/-
9	STXBP5	6	147708452	A	10		1	8	A/-;A/-;-/A;A/-;A/-;A/-;A/-;A/-;A/-
9	SAMD5	6	147887424	T	12		0	9	TTT/-;T/-;T/-;T/-;T/-;T/-;T/-;TT/-;T/-
9	ZDHHC14	6	158094562	A	14		0	9	AAA/-;A/-;AA/-;A/-;A/-;A/-;A/-;A/-;AA/-
9	GTF2H5	6	158613375	A	13		0	9	A/-;A/-;A/-;A/-;A/-;A/-;AA/-;AAA/-;AA/-
9	TMEM181	6	159056061	A	13		0	9	AA/-;A/-;AA/-;AA/-;AA/-;AA/-;A/-;A/-;AA/-
9	COX19	7	1008554	T	13		0	9	TT/-;T/-;TT/-;T/-;T/-;T/-;T/-;T/-;T/-
9	ZNF12	7	6730083	T	12		1	8	T/-;-/T;T/-;T/-;TT/-;T/-;T/-;TT/-;T/-
9	C7orf41	7	30202111	T	15		0	9	TTTTT/-;TT/-;T/-;T/-;TT/-;T/-;TT/-;TTT/-;TTTTT/-
9	GLI3	7	42001570	A	11		0	9	A/-;A/-;A/-;A/-;A/-;A/-;A/-;A/-;A/-
9	CALN1	7	71245683	A	12		0	9	AAA/-;A/-;AA/-;A/-;A/-;A/-;A/-;A/-;A/-
9	BAZ1B	7	72854832	A	12		0	9	AA/-;A/-;A/-;A/-;A/-;A/-;A/-;AA/-;AA/-
9	RUNDC3B	7	87460422	T	12		0	9	T/-;TT/-;T/-;T/-;TT/-;T/-;T/-;TT/-;TT/-
9	GIGYF1	7	100277789	A	25		0	9	AAAA/-;AA/-;AAAAA/-;AA/-;AAAA/-;AAAAAAA/-;AAAAAAAAAAAAA/-;AAA/-;AAAA/-
9	MLL5	7	104754048	T	14		1	8	TTTT/-;TT/-;-/T;T/-;T/-;TT/-;T/-;TT/-;T/-
9	SRPK2	7	104756826	A	11		1	8	A/-;A/-;-/A;AA/-;A/-;A/-;A/-;A/-;A/-
9	MKLN1	7	131175981	A	10		0	9	A/-;A/-;A/-;A/-;A/-;A/-;A/-;A/-;A/-
9	PLXNA4	7	131809796	A	13		0	9	AAA/-;A/-;A/-;AA/-;A/-;A/-;A/-;A/-;A/-
9	ZC3HAV1	7	138745420	A	20		0	9	AAAAAA/-;AAA/-;A/-;A/-;AAA/-;AAA/-;AAAA/-;AAAAAA/-;AAAAA/-
9	HIPK2	7	139252141	T	12		0	9	TT/-;T/-;TT/-;TT/-;T/-;T/-;T/-;T/-;T/-
9	HIPK2	7	139257356	T	11		0	9	T/-;T/-;T/-;T/-;T/-;T/-;T/-;T/-;T/-
9	DLGAP2	8	1653884	T	11		1	8	T/-;T/-;T/-;T/-;-/T;T/-;T/-;T/-;T/-
9	CNOT7	8	17088040	T	11		0	9	T/-;T/-;T/-;T/-;T/-;T/-;T/-;T/-;T/-
9	PSD3	8	18388196	T	15		0	9	TTT/-;TT/-;TTTTT/-;TTTT/-;TTTT/-;TT/-;TTT/-;T/-;TTTT/-
9	WHSC1L1	8	38175280	A	11	x	0	9	A/-;A/-;A/-;A/-;A/-;A/-;A/-;A/-;A/-
9	ADAM9	8	38961269	T	11		0	9	T/-;T/-;T/-;T/-;T/-;T/-;T/-;T/-;T/-
9	HOOK3	8	42877229	A	20	x	0	9	AAA/-;AA/-;AA/-;AAA/-;AAA/-;AAAAAA/-;A/-;AAAA/-;AA/-
9	PRKDC	8	48685754	A	11		0	9	AA/-;AA/-;A/-;A/-;AA/-;A/-;A/-;A/-;A/-
9	EYA1	8	72110674	A	12		0	9	A/-;AAA/-;A/-;AA/-;A/-;A/-;A/-;A/-;A/-
9	RDH10	8	74236679	T	10		0	9	TT/-;T/-;T/-;T/-;T/-;TT/-;T/-;T/-;T/-
9	UBE2W	8	74703503	A	14		2	7	AAA/-;A/-;-/A;-/A;A/-;A/-;A/-;A/-;A/-
9	ZNF704	8	81550825	A	12		0	9	A/-;AA/-;A/-;A/-;A/-;A/-;A/-;AA/-;AA/-
9	WWP1	8	87479626	A	13		1	8	AA/-;A/-;AA/-;A/-;A/-;AA/-;AA/-;AAAA/-;-/A
9	CPNE3	8	87571866	T	11		0	9	T/-;T/-;T/-;T/-;T/-;T/-;T/-;TTT/-;T/-
9	NECAB1	8	91970313	T	17		0	9	TTT/-;TTT/-;TTT/-;CTT/-;T/-;TTT/-;T/-;TTTTTT/-;TTT/-
9	NCALD	8	102701457	A	15		1	8	AAA/-;AA/-;AA/-;-/A;A/-;AA/-;AA/-;AA/-;AA/-
9	RSPO2	8	108911857	A	10		0	9	A/-;A/-;A/-;A/-;A/-;A/-;A/-;A/-;A/-
9	SNAPC3	9	15461138	A	13		1	8	AA/-;A/-;A/-;A/-;A/-;A/-;A/-;-/A;AAAA/-
9	KIAA1045	9	34981734	T	16		1	8	T/-;TT/-;TT/-;TT/-;T/-;TT/-;-/T;T/-;T/-
9	TMC1	9	75451137	T	15		0	9	TTT/-;TTT/-;T/-;T/-;T/-;T/-;T/-;T/-;TT/-
9	HNRNPK	9	86583190	T	12		0	9	T/-;T/-;T/-;T/-;T/-;T/-;T/-;T/-;TT/-
9	ASPN	9	95218906	A	12		0	9	A/-;AA/-;A/-;A/-;A/-;A/-;AA/-;AA/-;A/-
9	ANP32B	9	100777785	A	14		0	9	AAA/-;AAA/-;A/-;AA/-;A/-;AA/-;A/-;AA/-;A/-
9	PRPF4	9	116054494	A	14		1	8	AA/-;AA/-;A/-;A/-;A/-;A/-;-/A;A/-;AA/-
9	RNF183	9	116059469	T	16		0	9	TTTTTT/-;T/-;TT/-;T/-;T/-;T/-;T/-;T/-;TT/-
9	EXOSC2	9	133579921	A	11		1	8	A/-;A/-;A/-;A/-;A/-;A/-;A/-;-/A;A/-
9	COL5A1	9	137735002	T	13		0	9	T/-;T/-;TTT/-;TT/-;TT/-;T/-;T/-;T/-;T/-
9	PRKCQ	10	6469110	T	13		0	9	TTT/-;T/-;TT/-;TT/-;T/-;TTT/-;T/-;T/-;TT/-
9	CELF2	10	11373568	A	11		2	7	A/-;A/-;A/-;-/A;A/-;A/-;A/-;-/A;A/-
9	ABI1	10	27037488	A	11		0	9	AA/-;A/-;A/-;A/-;A/-;A/-;A/-;A/-;A/-
9	SVIL	10	29746854	A	16		0	9	AAA/-;AA/-;AA/-;A/-;AA/-;A/-;AA/-;AAA/-;AAA/-
9	CUL2	10	35298920	A	15		0	9	AAA/-;AA/-;AA/-;AAA/-;AA/-;A/-;AA/-;AAAAA/-;AAA/-
9	ERCC6	10	50666629	A	13		1	8	A/-;A/-;A/-;A/-;-/A;A/-;A/-;A/-;A/-
9	SAR1A	10	71911799	A	12		0	9	A/-;A/-;A/-;A/-;A/-;A/-;A/-;A/-;AA/-
9	TSPAN14	10	82279558	T	14		0	9	TTT/-;T/-;TT/-;T/-;TT/-;T/-;T/-;T/-;TT/-
9	RNLS	10	90034668	A	11		1	8	A/-;A/-;A/-;-/AA;A/-;A/-;A/-;A/-;A/-
9	IFIT2	10	91068076	T	12		1	8	T/-;T/-;-/T;T/-;T/-;T/-;T/-;T/-;T/-
9	PCGF5	10	93043933	T	11		0	9	T/-;T/-;T/-;T/-;T/-;T/-;T/-;T/-;TT/-
9	FGFBP3	10	93666831	A	11		0	9	AA/-;A/-;A/-;A/-;A/-;A/-;A/-;A/-;A/-
9	GOLGA7B	10	99627459	T	14		1	8	TTT/-;TTTT/-;TTTT/-;-/T;TT/-;TTT/-;T/-;TT/-;TTT/-
9	SHOC2	10	112773064	T	13		0	9	T/-;TTT/-;T/-;TT/-;T/-;T/-;TTC/-;T/-;TTT/-
9	C10orf46	10	120445457	T	14		1	8	TTT/-;T/-;TT/-;T/-;T/-;T/-;-/T;T/-;T/-
9	EBF3	10	131634113	A	13		0	9	AAA/-;AA/-;AA/-;A/-;A/-;AA/-;A/-;A/-;AAA/-
9	PAX6	11	31811126	A	14		0	9	AAAA/-;A/-;A/-;AA/-;A/-;A/-;A/-;A/-;A/-
9	STX3	11	59569296	A	11		3	6	AA/-;-/A;A/-;A/-;-/A;A/-;-/A;AA/-;A/-
9	CFL1	11	65622296	T	12		0	9	T/-;TT/-;T/-;T/-;T/-;T/-;T/-;T/-;T/-
9	SHANK2	11	70315628	T	14		0	9	T/-;TT/-;TTT/-;T/-;TT/-;T/-;TT/-;T/-;TTTT/-
9	CREBZF	11	85374468	A	15		0	9	AA/-;AA/-;AA/-;A/-;A/-;A/-;AA/-;AAA/-;AAAA/-
9	CCDC89	11	85395560	T	10		1	8	TT/-;T/-;T/-;T/-;T/-;T/-;-/T;T/-;T/-
9	MRE11A	11	94151548	T	13		0	9	TTT/-;T/-;T/-;TT/-;TT/-;T/-;TT/-;TTT/-;TTT/-
9	SESN3	11	94906283	A	13		3	6	AA/-;-/A;AA/-;A/-;-/A;AA/-;A/-;-/A;A/-
9	DCUN1D5	11	102929695	T	12		1	8	TTT/-;-/T;TTT/-;TTT/-;TT/-;T/-;T/-;T/-;TT/-
9	HYOU1	11	118915073	A	16		2	7	AAA/-;A/-;A/-;-/A;AA/-;A/-;-/A;AAA/-;A/-
9	KDM5A	12	389524	T	11	x	0	9	T/-;TT/-;TT/-;T/-;T/-;T/-;TT/-;T/-;T/-
9	CCND2	12	4411083	T	11	x	0	9	T/-;T/-;T/-;T/-;T/-;T/-;T/-;T/-;TT/-
9	TPI1	12	6980076	A	13		0	9	AA/-;A/-;A/-;A/-;A/-;A/-;A/-;AA/-;AA/-
9	SLC2A3	12	8072023	T	13		0	9	TT/-;T/-;T/-;T/-;T/-;TT/-;T/-;T/-;T/-
9	RIMKLB	12	8926681	T	11		0	9	T/-;T/-;T/-;T/-;T/-;T/-;T/-;T/-;T/-
9	KLRG1	12	9162783	A	15		0	9	AAAA/-;AA/-;AAAA/-;AA/-;AAA/-;A/-;A/-;AAA/-;AAA/-
9	CSDA	12	10851812	T	14		0	9	TTT/-;T/-;T/-;T/-;T/-;T/-;T/-;T/-;TT/-
9	DDN	12	49389157	A	11		1	8	A/-;A/-;AA/-;-/A;A/-;A/-;A/-;A/-;A/-
9	MLL2	12	49413581	A	12	x	0	9	AA/-;A/-;A/-;A/-;A/-;A/-;A/-;A/-;A/-
9	ZNF740	12	53582897	T	11		1	8	T/-;T/-;-/T;T/-;T/-;T/-;T/-;TT/-;TT/-
9	MDM2	12	69236874	T	13	x	0	9	TTT/-;T/-;T/-;T/-;T/-;T/-;T/-;T/-;TT/-
9	IGF1	12	102790567	T	13		0	9	TTT/-;TT/-;T/-;TT/-;T/-;T/-;T/-;T/-;T/-
9	WSB2	12	118471353	A	17		0	9	AAA/-;AA/-;A/-;AA/-;AA/-;AAA/-;A/-;AAAA/-;AAAA/-
9	KPNA3	13	50275335	T	15		1	8	TTTT/-;T/-;TTT/-;T/-;T/-;-/T;T/-;TTT/-;TT/-
9	PCDH17	13	58302652	A	23		0	9	AAAAAAAAA/-;AAAAAAA/-;AAAAAAA/-;AAAAAA/-;AA/-;AA/-;AAA/-;AAAAAAA/-;A/-
9	DCT	13	95091880	G	10		1	8	GG/-;G/-;G/-;G/-;-/G;G/-;G/-;GG/-;G/-
9	MGAT2	14	50089989	T	11		0	9	T/-;T/-;T/-;T/-;T/-;T/-;T/-;T/-;T/-
9	DNAAF2	14	50092078	A	13		0	9	A/-;A/-;A/-;A/-;A/-;A/-;A/-;A/-;AA/-
9	TMX1	14	51722941	T	12		0	9	TTT/-;T/-;TT/-;T/-;T/-;T/-;TT/-;T/-;T/-
9	MAX	14	65542680	A	12	x	0	9	AAA/-;A/-;A/-;AA/-;A/-;A/-;AA/-;AA/-;AA/-
9	RBM25	14	73587905	T	14		0	9	T/-;TT/-;T/-;T/-;T/-;TT/-;T/-;T/-;TT/-
9	PSEN1	14	73688299	T	13		2	7	T/-;-/T;TTT/-;T/-;-/T;T/-;T/-;TT/-;T/-
9	POMT2	14	77741350	T	11		0	9	T/-;T/-;T/-;T/-;T/-;T/-;T/-;T/-;TT/-
9	NRXN3	14	80328832	A	11		0	9	A/-;AA/-;A/-;A/-;A/-;A/-;A/-;AA/-;A/-
9	SEL1L	14	81942830	T	13		0	9	T/-;TTT/-;T/-;TTT/-;T/-;T/-;T/-;TTT/-;TTTT/-
9	BCL11B	14	99638737	T	14	x	0	9	TT/-;T/-;T/-;TT/-;T/-;T/-;T/-;T/-;T/-
9	C15orf2	15	24927892	A	10		1	8	A/-;A/-;A/-;-/A;A/-;A/-;A/-;A/-;A/-
9	CALML4	15	68483097	A	12		0	9	A/-;A/-;A/-;A/-;A/-;A/-;A/-;A/-;A/-
9	UACA	15	70946989	A	12		0	9	A/-;AAA/-;A/-;A/-;AA/-;A/-;A/-;A/-;A/-
9	MESDC1	15	81296130	T	12		0	9	T/-;T/-;T/-;T/-;TT/-;T/-;T/-;T/-;T/-
9	GRIN2A	16	9849713	A	11		0	9	A/-;A/-;A/-;A/-;A/-;A/-;A/-;A/-;A/-
9	SMG1	16	18819071	T	11		0	9	T/-;T/-;T/-;T/-;T/-;T/-;T/-;T/-;T/-
9	METTL9	16	21667439	A	12		1	8	AA/-;A/-;-/A;A/-;AA/-;A/-;A/-;A/-;A/-
9	GGA2	16	23475876	A	12		1	8	AA/-;A/-;A/-;A/-;A/-;AAA/-;A/-;A/-;-/AA
9	ORAI3	16	30965550	T	15		1	8	TT/-;T/-;TT/-;T/-;T/-;T/-;TT/-;T/-;-/T
9	PAPD5	16	50264032	A	13		1	8	AAA/-;A/-;-/A;A/-;A/-;AA/-;A/-;A/-;A/-
9	CNGB1	16	57916704	T	13		0	9	T/-;TT/-;TTT/-;T/-;T/-;T/-;T/-;TT/-;T/-
9	SNTB2	16	69339663	T	14		0	9	TT/-;TT/-;TT/-;T/-;TTT/-;T/-;TTTT/-;TTTTT/-;TT/-
9	CRK	17	1326755	A	14		0	9	AAA/-;A/-;AAA/-;AA/-;A/-;A/-;A/-;AA/-;A/-
9	WSB1	17	25640067	A	15		0	9	A/-;A/-;A/-;A/-;A/-;A/-;AA/-;A/-;A/-
9	C17orf63	17	27084395	T	13		0	9	TT/-;TTT/-;TTT/-;T/-;T/-;TT/-;T/-;TT/-;TTT/-
9	CNP	17	40126023	T	20		0	9	TTTTTTTT/-;TTTT/-;TTTTTT/-;TTTT/-;TTT/-;T/-;TT/-;TT/-;TTTTTT/-
9	BRCA1	17	41196822	T	19	x	0	9	TTT/-;TTT/-;TTTTT/-;TTT/-;TTT/-;T/-;TTTT/-;TTTTT/-;TTTT/-
9	CCDC43	17	42755659	A	16		0	9	A/-;AAAAA/-;AA/-;AAA/-;AAA/-;A/-;A/-;AA/-;A/-
9	GJC1	17	42876926	A	14		0	9	AA/-;A/-;A/-;A/-;A/-;A/-;A/-;AA/-;A/-
9	ZNF652	17	47369577	T	11		0	9	TT/-;TT/-;T/-;TT/-;T/-;T/-;T/-;T/-;TT/-
9	NOG	17	54672393	T	26		0	9	TTTTTTTTTTTTT/-;TTTTTT/-;TTTTTT/-;TTTT/-;TTTTTTTT/-;TTTTT/-;TTTTTTTT/-;TTTTTTTTTTTT/-;TTTTTT/-
9	APPBP2	17	58521491	A	16		0	9	AA/-;AA/-;A/-;A/-;A/-;AAA/-;AAAAAA/-;AA/-;A/-
9	INTS2	17	59944674	A	11		0	9	A/-;A/-;A/-;A/-;A/-;A/-;A/-;A/-;A/-
9	MED13	17	60023568	A	10		0	9	A/-;A/-;A/-;A/-;A/-;A/-;A/-;A/-;A/-
9	HELZ	17	65070977	A	14		0	9	A/-;A/-;A/-;A/-;A/-;AA/-;A/-;A/-;A/-
9	FAM104A	17	71204074	A	13		0	9	AA/-;A/-;A/-;A/-;AA/-;AA/-;A/-;AA/-;AA/-
9	HN1	17	73132059	A	12		0	9	A/-;AAA/-;A/-;A/-;A/-;AA/-;A/-;AA/-;A/-
9	SUMO2	17	73164056	T	12		1	8	TT/-;T/-;-/T;T/-;T/-;TT/-;T/-;TT/-;TT/-
9	TNRC6C	17	76101835	T	9		0	9	TT/-;T/-;T/-;T/-;T/-;T/-;T/-;T/-;T/-
9	TNRC6C	17	76102137	A	14		0	9	AAAA/-;A/-;AA/-;AAA/-;AA/-;AA/-;AAAA/-;AA/-;AA/-
9	PIEZO2	18	10670850	T	14		0	9	T/-;TT/-;TTT/-;TT/-;T/-;TTTT/-;TT/-;TT/-;TTT/-
9	DSC3	18	28573881	A	12		0	9	AA/-;A/-;AA/-;AA/-;A/-;A/-;A/-;A/-;AA/-
9	PIAS2	18	44392305	A	16		0	9	AAAA/-;AAA/-;AA/-;AA/-;A/-;AAA/-;A/-;AAA/-;AA/-
9	SMAD4	18	48609103	T	12		1	8	T/-;T/-;T/-;T/-;-/T;T/-;T/-;T/-;T/-
9	ZNF407	18	72516259	A	13		0	9	AAAA/-;A/-;A/-;A/-;A/-;A/-;AA/-;AAA/-;A/-
9	AES	19	3053067	T	13		1	8	T/-;TT/-;-/T;TT/-;T/-;TT/-;TT/-;T/-;TT/-
9	INSR	19	7116556	A	12		0	9	AAA/-;A/-;A/-;A/-;AA/-;A/-;A/-;A/-;A/-
9	ZNF563	19	12428824	T	15		0	9	TT/-;TT/-;TTT/-;TT/-;T/-;T/-;TT/-;TT/-;TT/-
9	GATAD2A	19	19616783	T	14		0	9	TTT/-;T/-;TT/-;T/-;T/-;T/-;T/-;TT/-;TTT/-
9	HNRNPL	19	39327102	A	11		1	8	A/-;A/-;A/-;A/-;A/-;A/-;-/A;A/-;A/-
9	HNRNPUL1	19	41812944	A	12		0	9	A/-;A/-;A/-;A/-;A/-;A/-;A/-;A/-;A/-
9	POU2F2	19	42594357	T	13		1	8	TTT/-;TT/-;-/T;T/-;TT/-;T/-;TT/-;T/-;TT/-
9	POU2F2	19	42595247	T	17		3	6	TTTTTT/-;TT/-;-/T;-/TT;TTTTT/-;-/T;TTT/-;TTTTT/-;TTTT/-
9	UBE2M	19	59067291	A	13		0	9	AA/-;A/-;A/-;A/-;A/-;A/-;A/-;AA/-;AA/-
9	C20orf194	20	3231788	T	14		1	8	-/T;TTT/-;T/-;TT/-;TT/-;TT/-;TT/-;TTT/-;TTT/-
9	NANP	20	25595952	A	13		0	9	AAA/-;A/-;A/-;A/-;A/-;A/-;A/-;A/-;AAA/-
9	SRC	20	36033634	T	13		0	9	TTT/-;T/-;TTT/-;T/-;T/-;T/-;TT/-;TT/-;T/-
9	KCNG1	20	49620213	T	14		0	9	TTT/-;T/-;TTT/-;TT/-;T/-;T/-;TT/-;TTT/-;TTT/-
9	TFAP2C	20	55213321	T	11		0	9	TT/-;T/-;T/-;T/-;T/-;T/-;T/-;T/-;T/-
9	PPP1R3D	20	58513624	T	11		0	9	T/-;T/-;TT/-;T/-;T/-;T/-;T/-;T/-;T/-
9	TIAM1	21	32491426	A	16		0	9	A/-;A/-;AA/-;A/-;A/-;TA/-;AA/-;A/-;A/-
9	KIAA1671	22	25592400	T	12		1	8	TT/-;T/-;-/T;TT/-;TT/-;T/-;TT/-;TT/-;T/-
9	ASPHD2	22	26839377	T	12		1	8	T/-;-/T;T/-;TT/-;TT/-;T/-;TT/-;T/-;T/-
9	EWSR1	22	29696469	T	16	x	0	9	TTTTT/-;TT/-;TTT/-;TT/-;TT/-;TT/-;TT/-;TTT/-;TTTTTT/-
9	APOL1	22	36662142	T	12		0	9	TT/-;T/-;T/-;T/-;T/-;T/-;TT/-;T/-;TT/-
9	TOMM22	22	39080206	T	18		0	9	TTTTTTT/-;T/-;TTTT/-;TTTTT/-;TTTT/-;TT/-;TTTT/-;TTTTTTT/-;TTT/-
9	TNRC6B	22	40719791	A	14		0	9	A/-;AAA/-;AAA/-;A/-;A/-;AAA/-;A/-;AA/-;AA/-
9	TNRC6B	22	40722032	A	10		5	4	A/-;A/-;-/AA;-/A;-/A;A/-;A/-;-/A;-/A
9	FBLN1	22	45996713	T	15		0	9	T/-;TTTTT/-;TT/-;T/-;T/-;T/-;TT/-;TTT/-;T/-
9	TBL1X	X	9687677	A	13		0	9	AA/-;AA/-;A/-;AA/-;A/-;AA/-;AA/-;AAAA/-;AA/-
9	USP9X	X	41092187	A	12		0	9	A/-;A/-;A/-;A/-;A/-;A/-;AA/-;AA/-;AA/-
9	CASK	X	41376115	A	11		2	7	A/-;-/A;A/-;A/-;A/-;A/-;-/A;AAA/-;A/-
9	FAM120C	X	54098999	A	12		0	9	A/-;A/-;AAC/-;A/-;A/-;A/-;A/-;A/-;AA/-
9	EDA2R	X	65815871	A	13		1	8	-/A;AAA/-;A/-;A/-;A/-;AA/-;A/-;A/-;A/-
9	ATRX	X	76763680	A	13	x	0	9	A/-;A/-;A/-;AA/-;AA/-;A/-;AA/-;AA/-;AA/-
9	CHM	X	85118101	T	13		0	9	TT/-;T/-;CT/-;T/-;TTT/-;TTT/-;TT/-;TT/-;TT/-
9	ZMAT1	X	101138439	T	11		5	4	T/-;-/T;-/T;-/TT;-/T;-/T;T/-;T/-;T/-
9	ZDHHC9	X	128939305	T	13		0	9	T/-;TT/-;T/-;TT/-;T/-;T/-;TTT/-;T/-;T/-
9	SLITRK2	X	144906688	T	22		0	9	TTTTTTTC/-;TTTTTTT/-;TTTTTTT/-;TTC/-;TC/-;TTTTT/-;TTTTT/-;TTTTTTTTT/-;TTTT/-
9	MECP2	X	153287315	G	10		1	8	GG/-;GG/-;G/-;G/-;G/-;-/G;GG/-;G/-;G/-
8	TNFRSF9	1	7980709	A	15		1	7	AA/-;A/-;AAA/-;AA/-;AA/-;-/A;AA/-;AA/-
8	DNAJC16	1	15897509	A	15		3	5	AA/-;A/-;A/-;-/A;A/-;-/A;-/A;A/-
8	RCC2	1	17735286	A	14		0	8	AAA/-;A/-;A/-;AA/-;A/-;A/-;AAA/-;AAA/-
8	FAM76A	1	28087458	T	17		0	8	TTTT/-;T/-;TTTTT/-;TT/-;TTT/-;T/-;TTT/-;TTTTT/-
8	SNRNP40	1	31732678	A	11		0	8	A/-;AA/-;A/-;AA/-;A/-;A/-;A/-;AA/-
8	KPNA6	1	32638097	T	19		0	8	TTTTTT/-;TTTTT/-;T/-;TT/-;TTTT/-;TT/-;TTTTT/-;TTT/-
8	CLSPN	1	36201820	A	17		0	8	AAAA/-;AA/-;AAAA/-;AA/-;AAA/-;A/-;AA/-;AAAAAA/-
8	THRAP3	1	36770048	T	17	x	0	8	TTTTC/-;TT/-;TT/-;TC/-;TT/-;TT/-;T/-;TTC/-
8	SERBP1	1	67878790	T	11		1	7	T/-;T/-;-/T;T/-;T/-;T/-;TT/-;T/-
8	GBP6	1	89851723	A	13		1	7	AAA/-;A/-;A/-;AA/-;A/-;A/-;A/-;-/A
8	SLC30A7	1	101446222	T	11		0	8	T/-;T/-;T/-;T/-;T/-;T/-;T/-;T/-
8	FAM102B	1	109181854	T	16		0	8	TTT/-;T/-;TT/-;T/-;T/-;TT/-;TT/-;T/-
8	LRIF1	1	111489901	A	13		1	7	AAA/-;AA/-;AAAA/-;A/-;-/A;AA/-;AA/-;A/-
8	PTGFRN	1	117530194	T	19		0	8	TTTTT/-;TTT/-;TTTTTT/-;TT/-;TTTTT/-;T/-;TT/-;TTTTT/-
8	RPRD2	1	150446033	A	23		0	8	AAAA/-;AAAAAAAA/-;AAAAAA/-;AAAAAA/-;AAA/-;AAAAA/-;AAAAA/-;AAAAA/-
8	GOLPH3L	1	150619972	A	15		0	8	AA/-;A/-;AA/-;AA/-;AAAAA/-;AAA/-;AA/-;AAA/-
8	PIGM	1	159998799	T	11		0	8	T/-;T/-;TT/-;T/-;T/-;T/-;TT/-;TT/-
8	NHLH1	1	160341681	A	11		1	7	A/-;-/A;A/-;A/-;A/-;A/-;A/-;A/-
8	RC3H1	1	173901044	T	11		0	8	T/-;T/-;T/-;T/-;T/-;T/-;T/-;T/-
8	FAM20B	1	179044327	A	13		0	8	A/-;A/-;A/-;A/-;A/-;AA/-;A/-;AA/-
8	MYOG	1	203052312	A	24		0	8	AAAAAAAAAA/-;AAAAAA/-;AAAAAAA/-;AAAAAAAAA/-;AAT/-;AAAA/-;AAAAAA/-;AAAAAAAAAA/-
8	NUCKS1	1	205686625	T	15		0	8	T/-;TT/-;T/-;TT/-;T/-;T/-;T/-;T/-
8	VASH2	1	213163405	A	13		0	8	AAA/-;A/-;A/-;AA/-;A/-;A/-;A/-;AA/-
8	TOMM20	1	235275028	T	12		0	8	T/-;T/-;T/-;T/-;T/-;TT/-;T/-;T/-
8	GGPS1	1	235507467	A	19		0	8	AAAAAAAA/-;AA/-;AAA/-;AAAA/-;AAA/-;AA/-;AAAAA/-;AAAAAAAA/-
8	SOX11	2	5835336	A	11		1	7	AA/-;A/-;A/-;A/-;-/A;A/-;A/-;A/-
8	SOX11	2	5838162	T	12		0	8	TT/-;T/-;T/-;T/-;T/-;T/-;T/-;T/-
8	MBOAT2	2	8998776	A	12		0	8	A/-;A/-;A/-;A/-;A/-;A/-;A/-;AAA/-
8	ASAP2	2	9544867	T	14		0	8	T/-;T/-;T/-;T/-;T/-;T/-;T/-;TTT/-
8	DNAJC27	2	25167222	T	14		0	8	TTTT/-;TT/-;TTTT/-;T/-;T/-;T/-;TTTT/-;TTT/-
8	NRXN1	2	50146698	A	11		0	8	A/-;A/-;AA/-;A/-;A/-;A/-;AA/-;A/-
8	SPTBN1	2	54895818	T	15		0	8	T/-;T/-;TT/-;T/-;T/-;T/-;TTT/-;TTTT/-
8	BCL11A	2	60684806	T	15	x	0	8	TTC/-;T/-;TT/-;TT/-;TT/-;TTTT/-;T/-;TTT/-
8	BCL11A	2	60685088	T	14	x	0	8	T/-;TT/-;T/-;T/-;T/-;T/-;T/-;TT/-
8	LGALSL	2	64687148	T	16		0	8	TTTT/-;TT/-;T/-;T/-;T/-;T/-;TT/-;TT/-
8	ANTXR1	2	69475344	T	11		1	7	-/T;T/-;T/-;TT/-;T/-;T/-;T/-;T/-
8	GGCX,MAT2A	2	85772062	T	12		0	8	T/-;T/-;T/-;T/-;T/-;T/-;TT/-;T/-
8	PTCD3	2	86366927	A	11		1	7	A/-;A/-;-/A;A/-;A/-;A/-;A/-;A/-
8	C2orf29	2	101886539	T	12		0	8	T/-;T/-;T/-;T/-;T/-;T/-;T/-;TT/-
8	CLASP1	2	122095393	T	12		0	8	TT/-;TT/-;T/-;T/-;TTT/-;TT/-;T/-;TT/-
8	PTPN18	2	131131909	T	14		1	7	TT/-;T/-;T/-;-/T;T/-;TT/-;T/-;T/-
8	PRPF40A	2	153509692	A	11		1	7	A/-;A/-;A/-;-/A;A/-;A/-;A/-;A/-
8	BBS5	2	170363001	A	13		0	8	AA/-;A/-;A/-;A/-;A/-;A/-;AA/-;AAA/-
8	SP3	2	174773639	A	12		0	8	AA/-;AA/-;AA/-;A/-;AA/-;AA/-;A/-;AAA/-
8	NEUROD1	2	182541840	T	34		0	8	TTTTTTTTTTTTTTTTTTT/-;TTTTT/-;TTTTTTTTTTT/-;TTTTTTTTT/-;TTTTTTTTTTTTTTTT/-;TTTTTTT/-;TTTTTTTTTTTTTT/-;TTTTTTTTTTTTTTTTT/-
8	SATB2	2	200136195	T	12		0	8	T/-;T/-;T/-;TT/-;T/-;T/-;T/-;T/-
8	ICA1L	2	203642600	T	22		0	8	TTTTTTTTT/-;TTTT/-;TTTTTTT/-;TTTT/-;TTTT/-;TTT/-;TTTT/-;TTTTTTTTT/-
8	KANSL1L	2	210886728	T	14		0	8	TT/-;T/-;T/-;T/-;T/-;T/-;T/-;T/-
8	IKZF2	2	213869994	A	11		0	8	A/-;A/-;A/-;A/-;A/-;A/-;A/-;A/-
8	IGFBP5	2	217537046	T	14		0	8	TT/-;TTT/-;TT/-;T/-;TT/-;TT/-;TTT/-;TTT/-
8	WDFY1	2	224742023	T	12		0	8	T/-;T/-;T/-;T/-;T/-;TT/-;TT/-;T/-
8	ARL4C	2	235403512	A	11		0	8	A/-;A/-;A/-;A/-;A/-;A/-;A/-;A/-
8	ANKRD28	3	15709863	T	13		1	7	TT/-;-/T;T/-;TTT/-;TT/-;T/-;T/-;T/-
8	NR1D2	3	24019977	A	12		1	7	AA/-;AAA/-;A/-;-/A;A/-;AA/-;AA/-;A/-
8	CRTAP	3	33188385	A	13		1	7	AAA/-;A/-;A/-;-/A;A/-;A/-;AA/-;A/-
8	CTDSPL	3	38025454	A	11		0	8	A/-;A/-;A/-;A/-;A/-;A/-;A/-;A/-
8	OXSR1	3	38296210	T	12		0	8	T/-;TT/-;T/-;TTT/-;T/-;T/-;T/-;TTT/-
8	CDC25A	3	48199853	T	12		1	7	TT/-;T/-;-/T;T/-;T/-;T/-;T/-;T/-
8	C3orf62	3	49308392	A	11		0	8	A/-;A/-;A/-;A/-;AA/-;A/-;A/-;A/-
8	DAG1	3	49571621	T	11		0	8	T/-;T/-;T/-;T/-;T/-;TT/-;TT/-;T/-
8	WDR82	3	52289628	A	11		0	8	A/-;A/-;A/-;A/-;A/-;A/-;A/-;AA/-
8	DNAH12	3	57327764	T	13		0	8	T/-;T/-;T/-;T/-;T/-;T/-;TT/-;T/-
8	MITF	3	70014805	A	11	x	1	7	A/-;A/-;A/-;-/A;A/-;A/-;A/-;A/-
8	CD47	3	107762289	A	11		1	7	A/-;A/-;A/-;A/-;-/A;A/-;AA/-;A/-
8	PPP2R3A	3	135865710	A	14		0	8	A/-;A/-;A/-;A/-;A/-;A/-;A/-;A/-
8	TBL1XR1	3	176741890	A	13		0	8	AAA/-;A/-;A/-;A/-;A/-;A/-;A/-;AA/-
8	FGF12	3	191861011	A	16		0	8	AA/-;A/-;A/-;A/-;A/-;A/-;AAAAA/-;AAA/-
8	LCORL	4	17883604	A	14		0	8	AAAA/-;AA/-;A/-;A/-;A/-;A/-;A/-;AAAAA/-
8	ARAP2	4	36068193	A	12		0	8	A/-;A/-;A/-;A/-;A/-;AA/-;A/-;AA/-
8	APBB2	4	40812595	A	24		2	6	AAAAAAAAAAA/-;AAAAAA/-;AAA/-;-/AA;AAAAAA/-;-/AAAAA;AAAAAA/-;AAAAAA/-
8	UBA6	4	68481878	T	12		0	8	T/-;TT/-;T/-;T/-;T/-;T/-;T/-;T/-
8	GNRHR	4	68604167	A	12		1	7	A/-;A/-;A/-;A/-;-/A;AA/-;A/-;A/-
8	UGT2B28	4	70160633	A	11		1	7	A/-;A/-;A/-;A/-;A/-;A/-;A/-;-/A
8	COX18	4	73923143	A	12		2	6	AAA/-;A/-;-/A;AA/-;A/-;A/-;-/A;A/-
8	CDS1	4	85570340	A	16		0	8	AA/-;A/-;AA/-;A/-;AA/-;A/-;AA/-;AA/-
8	NPNT	4	106892255	T	13		0	8	T/-;T/-;T/-;T/-;T/-;T/-;T/-;TT/-
8	AP1AR	4	113190823	A	11		1	7	A/-;A/-;-/A;A/-;A/-;A/-;A/-;A/-
8	NAF1	4	164049986	A	11		0	8	A/-;A/-;A/-;A/-;A/-;A/-;A/-;A/-
8	CTNND2	5	10972889	T	14		0	8	TT/-;T/-;TTTTT/-;TT/-;T/-;TT/-;T/-;TT/-
8	ANKH	5	14705394	A	13		0	8	AA/-;A/-;A/-;A/-;AA/-;A/-;AA/-;A/-
8	C5orf51	5	41921536	T	13		0	8	T/-;TTT/-;TT/-;TTT/-;T/-;T/-;T/-;TT/-
8	ARL15	5	53181903	A	15		3	5	AAA/-;-/A;AA/-;A/-;-/A;A/-;AA/-;-/A
8	PDE4D	5	58266736	A	15		0	8	A/-;AA/-;AA/-;AAA/-;A/-;A/-;A/-;A/-
8	PDE4D	5	58270458	A	12		0	8	A/-;AA/-;A/-;A/-;A/-;A/-;A/-;AA/-
8	PIK3R1	5	67594400	A	12	x	0	8	AAA/-;AA/-;A/-;A/-;A/-;A/-;A/-;A/-
8	FEM1C	5	114856776	A	14		1	7	A/-;A/-;AAA/-;AA/-;A/-;-/A;A/-;AA/-
8	C5orf63	5	126378333	A	11		0	8	AA/-;A/-;A/-;A/-;A/-;A/-;A/-;A/-
8	KIF3A	5	132029673	A	14		0	8	AA/-;AA/-;A/-;A/-;AA/-;A/-;A/-;AA/-
8	CDKN2AIPNL	5	133738314	A	11		0	8	A/-;A/-;A/-;A/-;A/-;A/-;A/-;A/-
8	SEC24A	5	134063500	A	14		0	8	AAA/-;A/-;A/-;A/-;A/-;AA/-;A/-;AA/-
8	HSPA9	5	137891048	A	13		0	8	AA/-;A/-;A/-;A/-;A/-;A/-;A/-;A/-
8	HBEGF	5	139713521	T	11		2	6	T/-;-/T;T/-;T/-;-/T;T/-;T/-;T/-
8	RBM27	5	145666094	T	15		0	8	TTT/-;TT/-;TTTT/-;T/-;T/-;T/-;TTT/-;TT/-
8	TIGD6	5	149373144	T	13		1	7	T/-;TT/-;T/-;-/T;T/-;TT/-;T/-;TTT/-
8	CAMK2A	5	149600685	T	11		0	8	T/-;T/-;T/-;T/-;T/-;T/-;TT/-;TT/-
8	GM2A	5	150647377	T	12		0	8	TT/-;T/-;TT/-;T/-;TT/-;TT/-;T/-;TT/-
8	EBF1	5	158124281	T	13	x	0	8	TT/-;TTT/-;TT/-;TT/-;T/-;T/-;T/-;TT/-
8	GABRB2	5	160716240	T	17		2	6	TTTTG/-;TT/-;TTTTT/-;TTTT/-;TTTT/-;-/TTTTTTT;TT/-;-/TTTTT
8	CANX	5	179158478	A	12		0	8	AAA/-;AAA/-;A/-;A/-;A/-;A/-;AA/-;A/-
8	FOXC1	6	1612420	A	12		1	7	A/-;-/A;A/-;A/-;A/-;A/-;A/-;A/-
8	SSR1	6	7284949	T	13		1	7	TT/-;T/-;T/-;T/-;-/T;T/-;T/-;T/-
8	TFAP2A	6	10397894	A	11		0	8	A/-;A/-;AA/-;A/-;A/-;A/-;AA/-;A/-
8	FAM8A1	6	17609274	T	11		0	8	T/-;T/-;T/-;TT/-;T/-;T/-;T/-;T/-
8	BRD2	6	32948952	T	11		1	7	TT/-;T/-;-/T;T/-;T/-;T/-;T/-;TT/-
8	MLIP	6	54130830	T	14		0	8	TTT/-;TTT/-;TT/-;TTT/-;T/-;TTT/-;T/-;TTT/-
8	KIAA1586	6	56919728	T	12		0	8	TT/-;T/-;T/-;T/-;T/-;T/-;TT/-;TT/-
8	PM20D2	6	89874861	T	11		0	8	T/-;T/-;T/-;T/-;T/-;T/-;T/-;T/-
8	RRAGD	6	90076245	A	19		0	8	AA/-;AAAAA/-;AAA/-;AAAA/-;AA/-;AAAA/-;AAAA/-;AAAAA/-
8	FAXC	6	99727340	T	12		0	8	TT/-;T/-;TT/-;T/-;T/-;TT/-;T/-;TTT/-
8	HS3ST5	6	114378234	T	12		0	8	T/-;T/-;T/-;T/-;T/-;T/-;T/-;T/-
8	TSPYL1	6	116599072	A	26		0	8	AAAAAAAA/-;AAAAAAA/-;AAAAAAA/-;AA/-;AAAAAAAAAAAAA/-;AAAAA/-;AAAAAAAAAA/-;AAAAAAAAAA/-
8	PHACTR2	6	144150326	T	22		0	8	TTTTTTT/-;TTTTTTT/-;TTTTTT/-;TTTTTT/-;TTTTT/-;TTTTTT/-;TTT/-;TTTTTTT/-
8	ARID1B	6	157530263	A	14		0	8	A/-;AA/-;A/-;AA/-;AA/-;AA/-;AA/-;AA/-
8	RPS6KA2	6	166824707	T	13		0	8	TTT/-;T/-;T/-;T/-;TT/-;T/-;TT/-;TT/-
8	TBP	6	170881390	T	13		2	6	T/-;-/T;T/-;T/-;T/-;-/T;TT/-;TT/-
8	THSD7A	7	11411371	T	18		0	8	T/-;TTTTTT/-;TTTTTTT/-;TTTTT/-;TTTTTT/-;TTT/-;TTTTTTT/-;TTTTTTT/-
8	IGF2BP3	7	23350734	T	12		0	8	T/-;T/-;T/-;T/-;TT/-;T/-;T/-;T/-
8	KCTD7	7	66105590	T	11		0	8	T/-;T/-;T/-;T/-;TT/-;T/-;T/-;T/-
8	RUNDC3B	7	87459582	A	13		1	7	AA/-;-/A;A/-;A/-;A/-;AA/-;A/-;A/-
8	ANKIB1	7	92028648	A	15		0	8	AAA/-;AA/-;AAA/-;AA/-;A/-;A/-;A/-;A/-
8	ANKIB1	7	92029900	T	11		0	8	T/-;T/-;T/-;T/-;T/-;T/-;T/-;TT/-
8	COG5	7	106843417	T	14		0	8	TTT/-;TTT/-;T/-;T/-;T/-;T/-;T/-;TT/-
8	WASL	7	123323429	A	12		0	8	AA/-;A/-;A/-;A/-;A/-;A/-;A/-;TA/-
8	NRF1	7	129395139	T	11		0	8	T/-;T/-;T/-;T/-;T/-;T/-;T/-;T/-
8	C7orf45	7	129856477	A	11		0	8	AA/-;A/-;A/-;A/-;A/-;A/-;A/-;A/-
8	SLC35B4	7	133978946	A	12		0	8	AA/-;AA/-;A/-;A/-;A/-;A/-;AAA/-;A/-
8	TMEM213	7	138490141	A	17		0	8	AAA/-;AAAAAAA/-;AAA/-;AAAA/-;AAA/-;AAAAAAA/-;AAAAAAA/-;AAAAA/-
8	RBM33	7	155571893	T	14		0	8	T/-;T/-;TT/-;TT/-;TT/-;T/-;T/-;TT/-
8	CSMD1	8	2794960	A	15		1	7	A/-;A/-;-/C;AAAAC/-;AA/-;AA/-;AAC/-;AA/-
8	NEIL2	8	11644526	T	13		0	8	TTT/-;TT/-;T/-;TTTT/-;TT/-;TT/-;T/-;TTT/-
8	MAK16	8	33357517	T	11		1	7	T/-;-/T;T/-;T/-;T/-;T/-;T/-;T/-
8	TACC1	8	38706480	T	15		0	8	TTT/-;TTT/-;T/-;T/-;T/-;T/-;T/-;T/-
8	SGK196	8	42978201	T	13		1	7	TTT/-;T/-;TTT/-;T/-;T/-;T/-;-/T;T/-
8	C8orf44-SGK3,SGK3	8	67772691	A	11		2	6	A/-;A/-;A/-;-/A;A/-;-/A;A/-;A/-
8	PAG1	8	81886388	T	22		0	8	TTTTTTTT/-;TTTTT/-;TTTT/-;TT/-;TTTTT/-;TTT/-;TT/-;TTTTT/-
8	POP1	8	99172001	A	12		2	6	AA/-;A/-;-/C;-/C;A/-;AA/-;AA/-;A/-
8	EXT1	8	118811807	T	11	x	0	8	TTT/-;TT/-;T/-;TT/-;T/-;T/-;T/-;TT/-
8	HAS2	8	122625491	T	10		0	8	T/-;T/-;T/-;T/-;T/-;T/-;T/-;T/-
8	HAS2	8	122625937	A	12		0	8	AA/-;A/-;A/-;A/-;A/-;A/-;AA/-;AA/-
8	NFIB	9	14082668	T	12	x	0	8	TT/-;T/-;T/-;T/-;T/-;T/-;T/-;T/-
8	NFIB	9	14082770	A	14	x	0	8	AA/-;A/-;AA/-;A/-;A/-;A/-;AA/-;AAA/-
8	NFIB	9	14086780	T	13	x	0	8	T/-;T/-;TT/-;T/-;T/-;T/-;TTT/-;T/-
8	UBE2R2	9	33917701	A	15		0	8	A/-;AA/-;A/-;AAA/-;A/-;AA/-;AAA/-;AAAA/-
8	RECK	9	36123173	T	11		1	7	TT/-;T/-;-/T;T/-;T/-;T/-;T/-;T/-
8	SHB	9	37917035	A	14		0	8	AAAA/-;A/-;AA/-;A/-;A/-;A/-;AA/-;AA/-
8	ZFAND5	9	74966507	T	16		8	0	-/TTAC;-/TAC;-/TAC;-/TTAC;-/TTAC;-/TTAC;-/TTTACT;-/TTAC
8	OSTF1	9	77761950	T	22		0	8	TTTTT/-;TTTTTTT/-;TTTT/-;TT/-;TTTTTTT/-;TTTTTT/-;TTTTTTTTT/-;TTTTTTTTTT/-
8	NTRK2	9	87487519	T	11		1	7	T/-;-/T;T/-;T/-;T/-;T/-;TT/-;T/-
8	NAA35	9	88637204	A	10		1	7	A/-;A/-;A/-;A/-;-/A;A/-;A/-;A/-
8	SEMA4D	9	91992884	A	13		0	8	AAA/-;A/-;AAA/-;A/-;A/-;AAA/-;AA/-;AA/-
8	HIATL1	9	97221878	T	11		0	8	T/-;T/-;T/-;T/-;T/-;T/-;T/-;T/-
8	SLC31A1	9	116026595	A	14		0	8	A/-;A/-;AA/-;A/-;A/-;A/-;A/-;AA/-
8	ZBTB34	9	129646764	T	11		1	7	T/-;T/-;-/T;T/-;T/-;T/-;T/-;T/-
8	SETX	9	135139196	T	11		0	8	T/-;T/-;T/-;T/-;T/-;T/-;T/-;T/-
8	KLF6	10	3819125	T	13		1	7	CTTT/-;-/T;TT/-;T/-;T/-;T/-;CTT/-;TT/-
8	UBE2D1	10	60129809	T	15		0	8	TTTT/-;T/-;TT/-;TT/-;TTT/-;T/-;T/-;TT/-
8	PBLD	10	70042808	T	13		0	8	TT/-;T/-;TTT/-;TT/-;T/-;TT/-;T/-;TT/-
8	ANAPC16	10	73993364	T	10		1	7	-/T;T/-;T/-;T/-;T/-;T/-;T/-;T/-
8	DLG5	10	79551102	A	13		0	8	AAAA/-;A/-;A/-;A/-;A/-;A/-;A/-;A/-
8	LDB3	10	88495760	T	11		1	7	T/-;TT/-;TTT/-;T/-;T/-;-/T;T/-;TT/-
8	PAPSS2	10	89506941	A	13		0	8	A/-;AA/-;A/-;A/-;A/-;A/-;AAA/-;A/-
8	TNKS2	10	93624906	T	11		0	8	T/-;T/-;T/-;T/-;T/-;T/-;T/-;T/-
8	FGFBP3	10	93667294	A	15		1	7	AAAAAA/-;AA/-;AAA/-;-/A;A/-;A/-;AAA/-;AAA/-
8	TLL2	10	98124864	A	11		0	8	A/-;A/-;A/-;A/-;A/-;A/-;A/-;AA/-
8	FAM178A	10	102724796	T	14		0	8	TT/-;TT/-;TT/-;T/-;TT/-;T/-;T/-;TTTT/-
8	ARL3	10	104436296	T	13		1	7	T/-;T/-;TT/-;-/T;T/-;T/-;TT/-;T/-
8	TRUB1	10	116735235	T	12		0	8	TTT/-;TTT/-;T/-;T/-;T/-;T/-;TT/-;T/-
8	GFRA1	10	117817246	T	12		0	8	TT/-;TT/-;TT/-;TT/-;T/-;T/-;TT/-;T/-
8	RAB11FIP2	10	119766678	A	16		0	8	AAA/-;A/-;A/-;A/-;A/-;A/-;AA/-;AAA/-
8	RAB11FIP2	10	119766959	A	12		3	5	AA/-;-/A;A/-;-/A;A/-;-/A;AA/-;AA/-
8	FAM53B	10	126308225	A	14		0	8	A/-;AA/-;A/-;AA/-;A/-;A/-;A/-;AAA/-
8	FOXI2	10	129538781	G	10		0	8	G/-;G/-;G/-;G/-;G/-;G/-;G/-;GG/-
8	NAP1L4	11	2966277	A	15		0	8	AAAA/-;A/-;AA/-;AA/-;AA/-;A/-;AAA/-;AAA/-
8	TRIM66	11	8636481	T	13		3	5	TT/-;-/TT;-/T;T/-;T/-;-/T;T/-;T/-
8	RPL27A	11	8711062	A	13		0	8	A/-;A/-;AA/-;A/-;A/-;A/-;A/-;AA/-
8	TMEM41B	11	9303927	A	14		0	8	A/-;A/-;A/-;A/-;A/-;A/-;A/-;AA/-
8	TCP11L1	11	33094800	T	11		0	8	T/-;T/-;T/-;T/-;T/-;T/-;T/-;T/-
8	MED19	11	57471200	T	13		1	7	TT/-;-/T;AT/-;T/-;T/-;T/-;T/-;TTT/-
8	SYT7	11	61282935	T	12		1	7	TT/-;TTT/-;T/-;T/-;-/T;T/-;TT/-;T/-
8	FLRT1	11	63886400	A	12		0	8	AA/-;A/-;A/-;AA/-;A/-;A/-;AA/-;A/-
8	CABP4	11	67226511	T	14		0	8	TT/-;T/-;TT/-;TTTT/-;T/-;TT/-;T/-;TT/-
8	CCND1	11	69468188	T	14	x	0	8	TTTT/-;TT/-;TT/-;TT/-;TT/-;T/-;TTTT/-;TT/-
8	SHANK2	11	70317370	A	12		4	4	AA/-;-/A;A/-;A/-;-/A;-/A;-/A;A/-
8	CREBZF	11	85369693	A	13		0	8	A/-;A/-;AA/-;A/-;AAA/-;A/-;A/-;A/-
8	PGR	11	100902322	T	15		1	7	TTTTT/-;TT/-;TT/-;T/-;T/-;T/-;T/-;-/T
8	GRIA4	11	105783204	A	11		1	7	-/A;A/-;A/-;A/-;A/-;A/-;A/-;A/-
8	DIXDC1	11	111892704	A	18		1	7	AAAAA/-;AAA/-;A/-;AA/-;A/-;-/AA;AAAAA/-;AAA/-
8	USP28	11	113669137	A	11		2	6	A/-;-/A;A/-;A/-;A/-;-/A;A/-;A/-
8	BACE1	11	117159734	T	11		0	8	TT/-;T/-;T/-;T/-;T/-;T/-;TT/-;T/-
8	NTM	11	132205624	T	14		1	7	T/-;TTT/-;TTT/-;TT/-;-/T;TTT/-;TTT/-;T/-
8	CHD4	12	6679324	T	13		0	8	T/-;TTT/-;TT/-;T/-;TT/-;TT/-;TTT/-;TTT/-
8	FOXJ2	12	8208084	A	13		0	8	AA/-;A/-;AA/-;A/-;A/-;A/-;AA/-;AAA/-
8	LRP6	12	12272289	A	12		0	8	A/-;AA/-;A/-;A/-;A/-;A/-;A/-;A/-
8	FGFR1OP2	12	27118595	A	11		0	8	A/-;A/-;A/-;A/-;A/-;A/-;AA/-;A/-
8	KLHDC5	12	27954137	T	13		0	8	TT/-;TT/-;T/-;TT/-;T/-;TT/-;TTT/-;T/-
8	FAM60A	12	31435557	A	10		0	8	A/-;A/-;A/-;A/-;A/-;AA/-;A/-;AA/-
8	SENP1	12	48437911	T	11		0	8	T/-;T/-;T/-;T/-;T/-;T/-;T/-;TT/-
8	PIP4K2C	12	57996739	T	13		0	8	TT/-;TT/-;TT/-;T/-;TT/-;T/-;T/-;T/-
8	NAP1L1	12	76441208	T	16		0	8	TTT/-;TTTT/-;TTT/-;TT/-;TTT/-;T/-;TTT/-;TT/-
8	TESC	12	117476742	T	14		0	8	T/-;TTT/-;TTTT/-;TT/-;T/-;T/-;T/-;TT/-
8	PEBP1	12	118582974	A	21		0	8	AA/-;AAAAA/-;AAA/-;AAAA/-;TA/-;AAA/-;A/-;AAAAA/-
8	SRRM4	12	119597688	A	14		0	8	AAAA/-;A/-;AA/-;A/-;AA/-;A/-;AA/-;AAAA/-
8	CIT	12	120123940	T	11		0	8	TT/-;T/-;T/-;T/-;T/-;T/-;T/-;TT/-
8	XPO4	13	21356030	A	10		0	8	A/-;A/-;A/-;A/-;A/-;A/-;A/-;A/-
8	FLT1	13	28877147	A	12		0	8	AA/-;AA/-;A/-;A/-;A/-;A/-;A/-;AA/-
8	COG6	13	40325365	T	13		0	8	TT/-;T/-;TT/-;T/-;T/-;T/-;TT/-;T/-
8	LRCH1	13	47325658	A	10		0	8	A/-;A/-;GA/-;A/-;A/-;A/-;A/-;A/-
8	DIAPH3	13	60240492	A	16		1	7	-/A;AA/-;AAAA/-;A/-;A/-;AA/-;AAAA/-;AAAAA/-
8	ZIC5	13	100616015	A	11		0	8	A/-;A/-;A/-;A/-;A/-;A/-;A/-;A/-
8	ATP11A	13	113540851	T	12		0	8	T/-;TT/-;TT/-;T/-;T/-;T/-;T/-;T/-
8	KLHL28	14	45398007	T	11		0	8	T/-;T/-;T/-;T/-;T/-;T/-;T/-;T/-
8	PTGDR	14	52741747	A	11		0	8	A/-;AA/-;AA/-;A/-;A/-;A/-;A/-;AA/-
8	DDHD1	14	53513440	A	12		0	8	AAA/-;A/-;A/-;A/-;A/-;A/-;A/-;AA/-
8	SAMD4A	14	55259424	T	14		1	7	-/T;TT/-;T/-;T/-;T/-;TTT/-;TTT/-;TT/-
8	MAPK1IP1L	14	55532699	A	11		1	7	A/-;AAA/-;A/-;-/A;A/-;A/-;A/-;A/-
8	NAA30	14	57877779	T	15		0	8	T/-;TTTT/-;T/-;TT/-;TT/-;T/-;T/-;T/-
8	C14orf37	14	58471379	T	11		1	7	T/-;T/-;T/-;T/-;T/-;T/-;T/-;-/T
8	PPM1A	14	60759368	T	17		1	7	TTTTTT/-;TT/-;TTT/-;TTT/-;T/-;-/T;T/-;TTTTTT/-
8	PPM1A	14	60761434	T	10		0	8	T/-;TTT/-;T/-;T/-;TT/-;T/-;T/-;T/-
8	SNAPC1	14	62262434	A	11		0	8	A/-;A/-;A/-;A/-;A/-;A/-;A/-;A/-
8	PPP2R5E	14	63842468	T	11		0	8	TT/-;T/-;TT/-;T/-;T/-;T/-;T/-;T/-
8	RDH11	14	68144081	T	29		0	8	TTTTTTTTTTTTT/-;TTTTT/-;TTTTTTTTTT/-;TTTTTTT/-;TTTTTT/-;TTTTTTTT/-;TTTTTTTTTTTTTTT/-;TTTTTTTTTT/-
8	RAD51B	14	68964203	T	12		1	7	T/-;T/-;T/-;T/-;T/-;T/-;-/T;T/-
8	TTLL5	14	76420882	T	11		0	8	T/-;T/-;T/-;T/-;T/-;T/-;TT/-;TT/-
8	DIO2	14	80665115	A	21		0	8	AAAAAAAAAA/-;AAAAA/-;AAAAAAA/-;AAAA/-;AAAAAA/-;AAAAAAA/-;AAAAAAAAAAAA/-;AA/-
8	FOXN3	14	89622980	T	13		0	8	TTT/-;T/-;TT/-;TT/-;T/-;T/-;TT/-;TT/-
8	BCL11B	14	99637948	T	12	x	0	8	TT/-;T/-;TT/-;T/-;TTT/-;T/-;T/-;TT/-
8	CCDC85C	14	99978766	A	12		0	8	AA/-;A/-;A/-;AA/-;A/-;A/-;AA/-;AAA/-
8	RYR3	15	34157542	A	10		0	8	A/-;A/-;A/-;A/-;A/-;A/-;A/-;A/-
8	THBS1	15	39889482	T	21		2	6	TTTT/-;TTTTT/-;TTTT/-;TTT/-;-/G;TTTT/-;-/G;TTTTT/-
8	DNAJC17	15	41060071	A	14		2	6	AA/-;A/-;-/A;A/-;A/-;A/-;-/A;A/-
8	GNB5	15	52413808	T	15		1	7	TT/-;T/-;TT/-;T/-;T/-;-/T;T/-;TT/-
8	RAB8B	15	63557575	T	13		3	5	-/T;T/-;T/-;-/TTTT;T/-;-/T;T/-;T/-
8	IGDCC3	15	65620634	T	22		0	8	TTTTTTTT/-;TTTTTT/-;TT/-;TTTT/-;TTTTTT/-;TTTTTTTTT/-;TTTT/-;TTTTTTT/-
8	MESDC1	15	81296263	T	9		0	8	T/-;T/-;T/-;T/-;T/-;T/-;T/-;T/-
8	IQGAP1	15	91044622	A	14		0	8	AAA/-;AAA/-;AA/-;A/-;A/-;A/-;AA/-;A/-
8	ASB7	15	101189294	T	10		1	7	T/-;-/T;TT/-;T/-;T/-;TT/-;T/-;T/-
8	ASB7	15	101191403	T	13		2	6	TTT/-;-/T;TT/-;T/-;T/-;TT/-;T/-;-/T
8	ABAT	16	8876793	T	11		0	8	TT/-;TT/-;T/-;T/-;T/-;T/-;T/-;TT/-
8	TMC7	16	19073948	A	10		0	8	A/-;AA/-;A/-;A/-;A/-;A/-;A/-;A/-
8	ITPRIPL2	16	19131049	A	12		0	8	AA/-;A/-;AA/-;A/-;A/-;A/-;AA/-;A/-
8	ITPRIPL2	16	19132370	T	13		0	8	T/-;T/-;T/-;T/-;T/-;T/-;T/-;T/-
8	GTF3C1	16	27471986	T	11		0	8	T/-;T/-;T/-;T/-;T/-;T/-;T/-;T/-
8	TAOK2	16	30003412	T	17		0	8	TTT/-;TT/-;TTTT/-;TT/-;TTT/-;TTTT/-;TTTTT/-;TTT/-
8	HSF4	16	67203836	T	12		0	8	T/-;TT/-;TT/-;T/-;TT/-;T/-;T/-;TT/-
8	ZFHX3	16	72820141	T	15		0	8	TTTTT/-;T/-;TTTT/-;TTT/-;T/-;TTT/-;T/-;T/-
8	ZFHX3	16	72820315	T	15		1	7	T/-;T/-;-/T;T/-;T/-;TT/-;T/-;T/-
8	ZFHX3	16	72820484	A	17		1	7	AAAAA/-;A/-;A/-;-/A;AAA/-;A/-;AA/-;AAAAAA/-
8	GGT6	17	4460607	T	20		0	8	TT/-;TTTTTTT/-;TTTT/-;T/-;TTTTTT/-;TTTT/-;TT/-;TTTTTTT/-
8	NLK	17	26522835	T	12		0	8	TT/-;T/-;T/-;T/-;T/-;T/-;T/-;T/-
8	GIT1	17	27901147	A	12		0	8	A/-;A/-;AA/-;A/-;AA/-;A/-;AA/-;A/-
8	ADAP2	17	29285906	A	14		0	8	A/-;A/-;A/-;A/-;AA/-;AA/-;AAAA/-;AA/-
8	SUZ12	17	30327652	A	17	x	0	8	AAAA/-;AA/-;AAAA/-;AAA/-;AAA/-;AA/-;AA/-;A/-
8	KANSL1	17	44107957	A	14		0	8	AAA/-;A/-;GA/-;A/-;A/-;A/-;AA/-;AAA/-
8	KPNB1	17	45760457	A	29		0	8	AAAAAAAAA/-;AAAAAAAAAAA/-;AAAAAAA/-;AAAAAAAAA/-;AAAAAAAAAA/-;AAAAAAAAAAAAA/-;AAAAAAAAAAAA/-;AAAAAAAAAAA/-
8	TOB1	17	48940257	A	11		0	8	A/-;A/-;A/-;A/-;A/-;AA/-;A/-;A/-
8	AKAP1	17	55197932	A	17		0	8	AAA/-;AAAA/-;AA/-;A/-;AA/-;A/-;A/-;AA/-
8	APPBP2	17	58524282	A	12		0	8	AA/-;A/-;AA/-;A/-;AA/-;AA/-;A/-;AA/-
8	MAP3K3	17	61772450	A	18		0	8	AAAA/-;AA/-;A/-;AAA/-;AAA/-;AA/-;AA/-;AA/-
8	H3F3B	17	73774200	T	13		0	8	TT/-;T/-;T/-;TT/-;T/-;T/-;T/-;T/-
8	ASXL3	18	31327378	A	16		0	8	AAA/-;AAA/-;AAAA/-;AA/-;A/-;A/-;A/-;AAAA/-
8	DTNA	18	32446840	T	12		0	8	T/-;T/-;TT/-;TT/-;T/-;TT/-;T/-;T/-
8	TCF4	18	52891869	A	11		0	8	A/-;A/-;A/-;A/-;A/-;A/-;A/-;A/-
8	ONECUT2	18	55150353	A	13		0	8	AA/-;A/-;AA/-;A/-;A/-;AA/-;AAA/-;AA/-
8	PIGN	18	59712452	A	11		1	7	A/-;A/-;A/-;-/A;AG/-;A/-;A/-;A/-
8	CIRBP	19	1272777	T	11		0	8	T/-;T/-;T/-;T/-;T/-;T/-;T/-;T/-
8	ILF3	19	10796314	T	10		0	8	T/-;T/-;T/-;T/-;T/-;T/-;TT/-;T/-
8	ELAVL3	19	11562279	T	16		0	8	TTTTTT/-;TTTT/-;TT/-;T/-;TGTC/-;TT/-;T/-;TTT/-
8	ZNF136	19	12299609	A	13		0	8	AAA/-;A/-;AA/-;A/-;A/-;A/-;AA/-;AAA/-
8	CRTC1	19	18890268	T	14		1	7	TT/-;-/T;T/-;T/-;T/-;T/-;TTT/-;T/-
8	ZNF430	19	21241253	A	14		0	8	AAA/-;A/-;AA/-;AA/-;A/-;A/-;AA/-;AA/-
8	ZNF536	19	31048942	A	11		1	7	AA/-;A/-;-/A;A/-;A/-;A/-;A/-;A/-
8	PAF1	19	39876312	A	12		3	5	A/-;A/-;-/A;-/A;A/-;A/-;-/A;AA/-
8	HIF3A	19	46843766	T	12		0	8	T/-;T/-;TT/-;TT/-;TT/-;T/-;T/-;T/-
8	ZNF347	19	53643154	T	12		0	8	TT/-;T/-;TT/-;T/-;T/-;T/-;TT/-;T/-
8	MYADM	19	54379104	A	11		2	6	AAA/-;A/-;-/A;A/-;AA/-;A/-;-/AA;A/-
8	LILRB3	19	54720559	T	11		1	7	TT/-;T/-;-/T;T/-;T/-;TT/-;TT/-;TTT/-
8	PEG3	19	57323787	T	13		1	7	T/-;T/-;-/T;TTT/-;TTT/-;T/-;TT/-;T/-
8	ZNF264	19	57730526	A	14		1	7	A/-;A/-;A/-;-/A;A/-;AAA/-;A/-;AA/-
8	ZNF154	19	58212531	A	12		0	8	AA/-;AA/-;A/-;A/-;A/-;A/-;A/-;AA/-
8	XKR7	20	30585885	G	10		0	8	G/-;G/-;G/-;GG/-;G/-;G/-;G/-;G/-
8	DNMT3B	20	31395998	T	11		0	8	TTT/-;T/-;T/-;T/-;T/-;T/-;TT/-;T/-
8	ITCH	20	33098249	T	27		0	8	TTTTTTTTTTTTT/-;TTTTTTTTTT/-;TTTTTTTTT/-;TTT/-;TTTTTTT/-;TTTTTTTTT/-;TTTTTTT/-;TTTTTTTT/-
8	RBL1	20	35632029	A	13		1	7	AA/-;AAA/-;AA/-;A/-;A/-;A/-;A/-;-/A
8	TTPAL	20	43119717	A	24		1	7	AAAAAAAAAAAAT/-;AAAAAAAAAAATTT/-;-/TT;AAAAT/-;AT/-;AAAAAAAT/-;AAAAAAAATT/-;AAAAAATT/-
8	TTPAL	20	43119741	T	13		1	7	AAAAAAAAAAAAT/-;AAAAAAAAAAATTT/-;-/TT;AAAAT/-;AT/-;AAAAAAAT/-;AAAAAAAATT/-;AAAAAATT/-
8	NCOA3	20	46284870	T	17		0	8	TTTT/-;T/-;TT/-;TTTT/-;TTT/-;TT/-;T/-;TTTT/-
8	SULF2	20	46286321	A	10		0	8	AA/-;A/-;A/-;A/-;A/-;A/-;A/-;A/-
8	TMEM189	20	48741400	A	14		0	8	A/-;A/-;A/-;A/-;AA/-;A/-;A/-;AAA/-
8	FAM210B	20	54943386	A	13		1	7	A/-;-/A;A/-;A/-;A/-;A/-;A/-;AAA/-
8	SAMD10	20	62605494	T	12		2	6	T/-;TTT/-;TT/-;-/T;-/T;T/-;TT/-;TT/-
8	DOPEY2	21	37666278	A	14		1	7	AAA/-;AA/-;A/-;A/-;A/-;AA/-;A/-;-/A
8	ZNF295	21	43408870	T	12		1	7	TT/-;T/-;T/-;-/T;T/-;T/-;T/-;TT/-
8	PDE9A	21	44195538	A	13		0	8	AA/-;AAA/-;A/-;AA/-;A/-;A/-;AAA/-;AAA/-
8	ADRBK2	22	26121916	A	11		0	8	AA/-;AA/-;A/-;A/-;A/-;A/-;A/-;A/-
8	MYH9	22	36677554	A	12	x	1	7	AAA/-;A/-;-/A;A/-;A/-;A/-;AA/-;AAA/-
8	CSNK1E	22	38686865	A	11		1	7	A/-;A/-;-/A;A/-;A/-;A/-;A/-;A/-
8	TNRC6B	22	40720295	T	15		0	8	TTT/-;TT/-;TT/-;TT/-;TT/-;TTT/-;T/-;TT/-
8	TNRC6B	22	40723853	T	12		0	8	T/-;T/-;T/-;T/-;T/-;T/-;T/-;T/-
8	TCF20	22	42556647	A	12		1	7	AA/-;A/-;-/C;A/-;A/-;A/-;A/-;A/-
8	WWC3	X	10109659	A	16		1	7	A/-;AA/-;AA/-;-/A;A/-;AA/-;AA/-;A/-
8	TRAPPC2	X	13732263	A	20		2	6	AAAAAAAAA/-;AA/-;AAAAA/-;-/AA;AAAA/-;-/A;AAAAAAAA/-;AAAAAAAAA/-
8	BEND2	X	18183098	A	15		0	8	AAA/-;AAA/-;A/-;A/-;A/-;A/-;AA/-;AAA/-
8	RS1	X	18659978	A	13		0	8	AA/-;A/-;A/-;A/-;A/-;A/-;A/-;A/-
8	MAGEB3	X	30255423	A	11		0	8	AA/-;A/-;A/-;A/-;A/-;A/-;A/-;A/-
8	TMEM47	X	34646667	T	12		0	8	TT/-;T/-;TTT/-;T/-;TT/-;T/-;TTT/-;T/-
8	PIM2	X	48770832	A	20		1	7	AAAA/-;AAAAAA/-;AAAAA/-;AAAA/-;-/A;AAAAA/-;AAAAAAA/-;AAAA/-
8	CLCN5	X	49862214	A	12		0	8	A/-;A/-;A/-;A/-;A/-;A/-;A/-;AA/-
8	TSR2	X	54471046	T	10		2	6	-/T;-/T;TT/-;T/-;T/-;T/-;TT/-;T/-
8	FGD1	X	54471921	A	13		0	8	A/-;A/-;A/-;AAA/-;A/-;A/-;AAAA/-;A/-
8	PLP1	X	103047049	A	13		0	8	AA/-;AAA/-;AA/-;AA/-;AA/-;A/-;AAA/-;AAA/-
8	GPC3	X	132670055	A	13	x	0	8	AA/-;A/-;AAA/-;A/-;A/-;AAA/-;AA/-;A/-
7	GNB1	1	1717243	T	12		0	7	T/-;T/-;TT/-;T/-;T/-;TTT/-;T/-
7	PIK3CD	1	9787867	T	14		0	7	TTT/-;T/-;T/-;TTT/-;T/-;T/-;TT/-
7	CASZ1	1	10697879	A	12		0	7	A/-;A/-;AA/-;A/-;AA/-;AA/-;A/-
7	TARDBP	1	11084334	T	11		0	7	T/-;T/-;T/-;T/-;T/-;T/-;T/-
7	TCEB3	1	24086795	T	13		1	6	TT/-;T/-;T/-;T/-;T/-;TT/-;-/T
7	TMEM57	1	25826647	T	12		0	7	TT/-;T/-;T/-;T/-;T/-;TT/-;T/-
7	PAQR7	1	26188504	A	31		0	7	AAAAAAAAAAAAAAA/-;AAAA/-;AAAAAAA/-;AAAAAAAAAA/-;AAAAAAAA/-;AAAAAAAAAAA/-;AAAAAAAAAAAA/-
7	HMGN2	1	26801738	T	15		0	7	T/-;T/-;T/-;T/-;T/-;T/-;T/-
7	STX12	1	28150576	T	10		1	6	T/-;-/T;T/-;T/-;T/-;T/-;TT/-
7	PTAFR	1	28475837	T	27		0	7	TTTTTTTTT/-;TTTT/-;TTTTTTTT/-;TTTTTTTTTT/-;TTTTTTTTT/-;TTTT/-;TTTTTT/-
7	MARCKSL1	1	32799514	A	13		0	7	AA/-;A/-;A/-;A/-;A/-;A/-;AA/-
7	CAP1	1	40537925	A	19		0	7	A/-;GAAA/-;A/-;A/-;AAAAAAAAA/-;AA/-;AA/-
7	ELAVL4	1	50667063	A	12		0	7	A/-;A/-;A/-;A/-;AA/-;AA/-;A/-
7	NFIA	1	61923507	A	12		0	7	AA/-;AA/-;AA/-;A/-;A/-;AA/-;AA/-
7	ANKRD13C	1	70727639	A	12		2	5	AA/-;A/-;AA/-;-/AA;A/-;-/A;A/-
7	AK5	1	78025529	T	13		0	7	TT/-;T/-;T/-;T/-;TT/-;T/-;TT/-
7	ELTD1	1	79356150	T	11		0	7	T/-;T/-;T/-;T/-;T/-;T/-;T/-
7	DDAH1	1	85786202	A	12		0	7	AA/-;A/-;A/-;AA/-;AA/-;A/-;AA/-
7	EVI5	1	92977468	T	11		1	6	T/-;T/-;T/-;T/-;-/T;T/-;T/-
7	CLCC1	1	109474251	A	15		0	7	AAA/-;A/-;AAAA/-;A/-;A/-;A/-;AAAA/-
7	KIAA1324	1	109749369	T	11		1	6	T/-;T/-;T/-;T/-;T/-;T/-;-/T
7	SLC16A4	1	110906248	A	19		0	7	AA/-;AAA/-;AAAA/-;AAAA/-;AAA/-;AAAAAAAA/-;AAAA/-
7	GATAD2B	1	153781276	A	20		0	7	AAAAA/-;AAAA/-;AAAA/-;A/-;AA/-;AAAAAAA/-;AAAAAAA/-
7	ATP1B1	1	169101258	T	22		1	6	T/-;TTTT/-;TTT/-;TTT/-;-/T;TTTTT/-;TTTTTT/-
7	C1orf9	1	172580461	T	9		1	6	T/-;-/T;T/-;T/-;T/-;T/-;T/-
7	RC3H1	1	173905949	A	11		0	7	AA/-;AA/-;A/-;A/-;A/-;A/-;A/-
7	RNF2	1	185070035	T	11		0	7	T/-;T/-;T/-;T/-;TT/-;TT/-;T/-
7	GPR37L1	1	202098134	T	21		0	7	TTTTT/-;TT/-;TTT/-;TTT/-;TT/-;TTTTTTT/-;TTTTT/-
7	PLEKHA6	1	204190023	A	13		0	7	AA/-;AA/-;AA/-;A/-;A/-;A/-;A/-
7	DSTYK	1	205112279	T	14		1	6	T/-;TTT/-;T/-;TT/-;-/T;T/-;T/-
7	YOD1	1	207218943	A	15		1	6	AAA/-;-/A;A/-;AAA/-;A/-;A/-;A/-
7	ESRRG	1	216678796	T	11		1	6	T/-;T/-;-/T;T/-;T/-;T/-;T/-
7	GPR137B	1	236372039	T	10		2	5	T/-;-/T;T/-;-/T;T/-;T/-;T/-
7	ZNF238	1	244219574	A	9		1	6	AA/-;A/-;-/A;A/-;A/-;A/-;A/-
7	SOX11	2	5835565	A	10		1	6	AA/-;A/-;A/-;-/A;A/-;A/-;A/-
7	SOX11	2	5840553	A	14		0	7	AAA/-;A/-;AAAA/-;AA/-;A/-;AAAA/-;A/-
7	TRIB2	2	12882651	T	14		0	7	TT/-;TTT/-;TTTT/-;TT/-;T/-;TTTT/-;TTT/-
7	NCOA1	2	24991386	A	25	x	0	7	AAAAAAAAAAA/-;AAAA/-;AAAAA/-;AAAAA/-;AAAA/-;AAAAAAAAAA/-;AAAAAAAAA/-
7	PPP1CB	2	29023093	T	23		0	7	TTTT/-;TTTTTTT/-;TTT/-;TTTT/-;TTTTTT/-;TTTTTTTT/-;TTTTTTTTT/-
7	LBH	2	30482683	T	13		1	6	T/-;TT/-;T/-;TT/-;T/-;-/T;T/-
7	CDC42EP3	2	37871767	A	17		0	7	A/-;AAA/-;A/-;A/-;AAAAAA/-;A/-;AAA/-
7	TMEM178	2	39944922	T	13		0	7	T/-;T/-;TT/-;T/-;TT/-;TT/-;TT/-
7	EML4	2	42557760	T	16	x	0	7	TTTT/-;T/-;TTTTT/-;TTT/-;TTT/-;TT/-;TT/-
7	ZFP36L2	2	43451131	T	16		0	7	TTTTTT/-;TT/-;TTT/-;TT/-;TT/-;TTT/-;TTTTTT/-
7	SIX3	2	45172486	A	15		0	7	GAAA/-;GAA/-;GAA/-;GA/-;GA/-;GAAA/-;GAAAAA/-
7	GGCX	2	85776950	A	16		0	7	AA/-;A/-;A/-;AA/-;AAA/-;AA/-;AAAAA/-
7	CNNM3	2	97499282	A	12		0	7	A/-;A/-;AA/-;A/-;A/-;A/-;AA/-
7	MGAT4A	2	99235843	A	11		0	7	A/-;A/-;A/-;A/-;A/-;A/-;A/-
7	SLC9A2	2	103326259	T	10		1	6	T/-;T/-;-/T;T/-;T/-;T/-;TT/-
7	LIMS1	2	109300694	A	10		0	7	A/-;A/-;A/-;A/-;A/-;A/-;A/-
7	BCL2L11	2	111923087	T	8		6	1	-/TTT;-/T;T/-;-/T;-/T;-/T;-/T
7	ZC3H6	2	113097278	T	13		0	7	TT/-;TT/-;TT/-;T/-;T/-;T/-;TT/-
7	EPB41L5	2	120932995	T	14		1	6	TT/-;T/-;T/-;-/T;T/-;T/-;T/-
7	INHBB	2	121108975	A	16		0	7	AAAA/-;A/-;A/-;A/-;A/-;A/-;A/-
7	FAM168B	2	131805980	G	9		1	6	-/GG;G/-;G/-;G/-;G/-;G/-;GG/-
7	FAM168B	2	131809057	A	15		0	7	AAAA/-;AA/-;AA/-;A/-;AAA/-;AAA/-;AAA/-
7	ZEB2	2	145146458	A	13		1	6	A/-;AA/-;AA/-;A/-;A/-;AA/-;-/A
7	KIF5C	2	149879666	T	10		0	7	T/-;T/-;T/-;T/-;T/-;T/-;T/-
7	RIF1	2	152331770	T	10		2	5	T/-;-/T;-/T;T/-;T/-;T/-;T/-
7	PKP4	2	159537313	T	10		2	5	T/-;-/T;T/-;T/-;-/T;T/-;T/-
7	ATF2	2	175939224	A	12		1	6	A/-;A/-;A/-;A/-;-/A;A/-;A/-
7	HNRNPA3	2	178088003	T	10		0	7	T/-;T/-;T/-;T/-;T/-;T/-;T/-
7	ALS2CR8	2	203849780	A	14		0	7	A/-;A/-;A/-;A/-;A/-;A/-;A/-
7	RAPH1	2	204299290	A	16		0	7	AAAAA/-;AAA/-;A/-;AA/-;AA/-;A/-;A/-
7	RAPH1	2	204300245	A	12		0	7	AA/-;A/-;A/-;A/-;A/-;AA/-;A/-
7	LANCL1	2	211297866	T	9		0	7	T/-;T/-;T/-;T/-;T/-;T/-;T/-
7	ARPC2	2	219118832	A	16		1	6	AA/-;AA/-;-/A;A/-;A/-;A/-;A/-
7	PAX3	2	223066537	A	15	x	2	5	A/-;A/-;A/-;-/A;-/A;A/-;A/-
7	FBXO36	2	230876986	A	11		1	6	-/A;A/-;A/-;A/-;A/-;A/-;A/-
7	CRBN	3	3192203	T	14		0	7	TTT/-;TT/-;T/-;T/-;T/-;TT/-;TTT/-
7	GRM7	3	7782693	T	11		1	6	TT/-;T/-;-/T;TTT/-;T/-;T/-;T/-
7	SETD5	3	9519364	T	22		0	7	TTTTTTTT/-;TT/-;TTT/-;TTT/-;TTT/-;TTTTTTT/-;TTTTTT/-
7	HRH1	3	11303523	A	11		1	6	A/-;A/-;A/-;A/-;-/A;AA/-;A/-
7	SLC6A6	3	14526825	T	11		0	7	T/-;T/-;T/-;T/-;T/-;TT/-;T/-
7	SLC25A20	3	48894566	A	12		0	7	AAA/-;A/-;A/-;A/-;A/-;AAA/-;A/-
7	QRICH1	3	49067798	A	11		0	7	A/-;A/-;A/-;A/-;A/-;A/-;A/-
7	SLMAP	3	57913670	T	13		0	7	TT/-;T/-;T/-;T/-;TT/-;T/-;T/-
7	KCTD6	3	58487416	T	11		1	6	T/-;-/T;T/-;T/-;T/-;T/-;T/-
7	ATXN7	3	63985895	T	11		0	7	T/-;T/-;T/-;T/-;T/-;T/-;T/-
7	FOXP1	3	71007141	T	11	x	0	7	T/-;T/-;TT/-;T/-;T/-;T/-;T/-
7	VGLL3	3	86990600	T	11		2	5	T/-;-/AA;T/-;T/-;T/-;-/A;T/-
7	BBX	3	107526558	A	13		0	7	AA/-;A/-;A/-;A/-;A/-;A/-;A/-
7	BBX	3	107529058	A	18		0	7	A/-;AAAA/-;AAA/-;AA/-;AA/-;AA/-;AAAAAA/-
7	GTPBP8	3	112719792	A	16		0	7	A/-;AAAA/-;AA/-;AA/-;A/-;A/-;A/-
7	TMEM108	3	133116234	A	14		0	7	AA/-;A/-;A/-;A/-;A/-;A/-;A/-
7	MSL2	3	135868430	A	13		1	6	A/-;AAAA/-;A/-;A/-;AA/-;A/-;-/G
7	CLDN18	3	137751331	A	14		0	7	A/-;A/-;AA/-;AA/-;A/-;AAAA/-;A/-
7	C3orf72	3	138671355	T	13		0	7	TTT/-;TTT/-;T/-;T/-;T/-;T/-;T/-
7	ZBTB38	3	141164926	A	14		1	6	AAA/-;AAA/-;AA/-;A/-;-/A;AA/-;AAA/-
7	RAP2B	3	152883396	T	12		1	6	TTT/-;T/-;TT/-;T/-;T/-;-/T;T/-
7	NCEH1	3	172349172	T	12		0	7	TTT/-;T/-;TTT/-;T/-;T/-;T/-;TT/-
7	GNB4	3	179116312	A	15		0	7	AAAA/-;AA/-;A/-;A/-;AA/-;AAAAA/-;AAG/-
7	FXR1	3	180694864	T	14		0	7	TT/-;TTT/-;CTTTT/-;T/-;TT/-;TT/-;TTT/-
7	DCUN1D1	3	182662348	A	12		0	7	A/-;A/-;A/-;A/-;A/-;A/-;AA/-
7	IGF2BP2	3	185362104	T	12		0	7	T/-;T/-;TT/-;TT/-;T/-;T/-;T/-
7	UBXN7	3	196080742	T	11		0	7	T/-;T/-;T/-;T/-;T/-;T/-;T/-
7	PCGF3	4	761103	T	11		0	7	T/-;T/-;TT/-;T/-;T/-;T/-;TT/-
7	CTBP1	4	1205654	A	14		0	7	AAA/-;A/-;AA/-;A/-;A/-;A/-;A/-
7	PPARGC1A	4	23796668	A	10		3	4	AGAG/-;-/AG;-/AG;AG/-;A/-;AG/-;-/AG
7	RBPJ	4	26433200	T	12		1	6	-/T;TT/-;T/-;T/-;T/-;T/-;T/-
7	PCDH7	4	31146676	T	12		0	7	T/-;TT/-;TT/-;TT/-;T/-;T/-;TT/-
7	RELL1	4	37614259	A	19		0	7	AAAAAA/-;AA/-;A/-;AA/-;AA/-;AAAA/-;AAAAAA/-
7	TBC1D1	4	38140082	A	10		0	7	A/-;AA/-;A/-;A/-;A/-;A/-;A/-
7	SLAIN2	4	48426784	A	11		0	7	A/-;A/-;A/-;A/-;A/-;A/-;A/-
7	IGJ	4	71521932	A	14		0	7	AAAA/-;A/-;AA/-;A/-;A/-;A/-;A/-
7	RUFY3	4	71655521	A	12		0	7	A/-;A/-;A/-;A/-;A/-;A/-;A/-
7	G3BP2	4	76568664	A	12		0	7	A/-;AA/-;A/-;AA/-;AA/-;A/-;A/-
7	SHROOM3	4	77701688	A	16		0	7	A/-;AAAA/-;A/-;A/-;AA/-;A/-;AAAAA/-
7	SEC31A	4	83740164	T	11		0	7	T/-;T/-;T/-;T/-;T/-;TT/-;T/-
7	PPM1K	4	89181913	A	12		0	7	A/-;A/-;A/-;A/-;A/-;A/-;A/-
7	PDLIM5	4	95508282	T	11		0	7	T/-;T/-;T/-;T/-;T/-;T/-;T/-
7	RG9MTD2	4	100470093	T	10		1	6	T/-;-/T;TT/-;TT/-;T/-;T/-;T/-
7	PHF17	4	129783594	T	13		0	7	T/-;T/-;T/-;TT/-;TT/-;T/-;TTT/-
7	ARFIP1	4	153832103	T	11		0	7	T/-;T/-;T/-;T/-;T/-;T/-;T/-
7	MARCH1	4	164446861	T	9		0	7	T/-;T/-;T/-;T/-;T/-;T/-;T/-
7	SPCS3	4	177250202	T	10		0	7	T/-;T/-;T/-;TT/-;T/-;T/-;T/-
7	ANKH	5	14709005	T	14		0	7	T/-;TT/-;T/-;TT/-;T/-;T/-;T/-
7	CDH12	5	21751069	T	10		1	6	T/-;T/-;T/-;-/T;T/-;T/-;T/-
7	NPR3	5	32786466	T	11		0	7	T/-;T/-;T/-;T/-;T/-;T/-;T/-
7	C5orf42	5	37107312	T	11		0	7	T/-;T/-;T/-;T/-;T/-;T/-;T/-
7	LIFR	5	38476770	A	11	x	0	7	A/-;A/-;A/-;A/-;AA/-;A/-;A/-
7	ERBB2IP	5	65376307	A	11		2	5	A/-;-/A;A/-;A/-;A/-;-/A;A/-
7	MAP1B	5	71504720	T	11		0	7	TT/-;T/-;T/-;T/-;T/-;TT/-;T/-
7	PDE8B	5	76722865	A	12		0	7	A/-;AA/-;AA/-;A/-;AAC/-;AA/-;AC/-
7	MEF2C	5	88018306	T	11		0	7	T/-;T/-;T/-;T/-;T/-;T/-;T/-
7	FAM172A	5	92956180	A	15		0	7	A/-;A/-;A/-;A/-;A/-;AAA/-;AA/-
7	CHD1	5	98191373	T	13		1	6	TTT/-;TT/-;TT/-;T/-;-/T;TTT/-;T/-
7	EFNA5	5	106712690	T	12		0	7	T/-;T/-;T/-;T/-;T/-;TT/-;TT/-
7	EFNA5	5	106714694	A	12		0	7	AA/-;A/-;A/-;A/-;A/-;A/-;A/-
7	SLC12A2	5	127524614	T	18		0	7	TTTT/-;TTT/-;TTTTT/-;T/-;T/-;TTT/-;TTTTTT/-
7	CDC42SE2	5	130729511	T	26		5	2	T/-;-/TTTG;-/G;-/TG;-/G;TTTTTTT/-;-/TG
7	IRF1	5	131817749	T	13		1	6	T/-;T/-;T/-;T/-;-/T;TT/-;TT/-
7	SEPT8	5	132087445	T	14		0	7	TTT/-;TT/-;T/-;TT/-;T/-;T/-;TT/-
7	TCF7	5	133483665	A	24		0	7	AAAAAAA/-;AAAAAAAA/-;AA/-;AAA/-;AAAAAAAA/-;AAAAAAA/-;AAAAAA/-
7	CAMLG	5	134086671	A	13		0	7	AAAA/-;A/-;AA/-;A/-;AA/-;AA/-;AAAA/-
7	SMAD5	5	135517922	A	14		0	7	AAAA/-;A/-;A/-;A/-;AAA/-;AAA/-;AA/-
7	PCDHB3	5	140482944	T	10		0	7	T/-;T/-;T/-;T/-;T/-;T/-;T/-
7	PCDHB16	5	140564983	T	13		0	7	TT/-;T/-;TT/-;T/-;T/-;T/-;TTT/-
7	GRPEL2	5	148732008	T	11		0	7	T/-;T/-;T/-;T/-;T/-;T/-;T/-
7	G3BP1	5	151183947	T	16		0	7	TTTT/-;T/-;TT/-;T/-;TT/-;T/-;TTT/-
7	G3BP1	5	151184780	T	11		1	6	TT/-;T/-;T/-;T/-;-/T;T/-;T/-
7	SGCD	5	156190731	A	12		0	7	AAA/-;A/-;A/-;A/-;AA/-;A/-;A/-
7	EBF1	5	158125830	A	12	x	0	7	AA/-;A/-;A/-;A/-;A/-;A/-;AA/-
7	GABRB2	5	160717255	T	12		1	6	T/-;T/-;T/-;-/T;T/-;TT/-;T/-
7	SNCB	5	176047396	A	11		2	5	A/-;A/-;A/-;A/-;A/-;-/A;-/A
7	CNOT6	5	180002893	T	12		0	7	TT/-;T/-;T/-;T/-;TT/-;TT/-;T/-
7	IRF4	6	407630	T	19	x	0	7	TTT/-;TTTT/-;TTT/-;TTTT/-;T/-;TTT/-;TTTTTT/-
7	MYLIP	6	16147099	A	14		0	7	A/-;A/-;A/-;A/-;A/-;A/-;AAAA/-
7	ATXN1	6	16300903	T	11		0	7	T/-;T/-;TT/-;T/-;T/-;T/-;TT/-
7	ATXN1	6	16301825	A	13		0	7	A/-;A/-;AA/-;A/-;A/-;A/-;A/-
7	SOX4	6	21597193	A	11		1	6	A/-;A/-;-/A;A/-;A/-;A/-;A/-
7	C6orf47	6	31626581	A	14		0	7	AAA/-;AAA/-;A/-;A/-;A/-;AAAA/-;AAA/-
7	FKBP5	6	35543220	T	10		0	7	T/-;T/-;T/-;T/-;TT/-;T/-;T/-
7	TBC1D22B	6	37299300	T	12		2	5	TT/-;-/T;T/-;T/-;T/-;-/T;TT/-
7	TAF8	6	42045496	T	11		3	4	-/T;T/-;-/T;-/T;T/-;T/-;T/-
7	MRPL2	6	43021977	G	12		0	7	G/-;GGG/-;GG/-;GGG/-;GG/-;GG/-;GG/-
7	POLH	6	43586699	G	10		0	7	G/-;G/-;GG/-;G/-;G/-;G/-;G/-
7	TFAP2B	6	50814901	A	10		1	6	A/-;A/-;A/-;AA/-;-/A;A/-;AA/-
7	LGSN	6	63988520	T	17		0	7	TTTTTT/-;TT/-;TTTT/-;TTT/-;TT/-;TT/-;TTTTTT/-
7	COL19A1	6	70917069	T	23		0	7	TTTTTTTT/-;TT/-;TTTT/-;TTTT/-;TTTT/-;TTTTTTT/-;TTTTTTTTT/-
7	TPBG	6	83076615	A	14		0	7	A/-;A/-;A/-;AA/-;A/-;A/-;AA/-
7	ZNF292	6	87972229	T	11		1	6	T/-;T/-;T/-;T/-;-/TT;T/-;T/-
7	FAXC	6	99724024	A	14		0	7	AAA/-;A/-;A/-;A/-;A/-;A/-;AAAA/-
7	GRIK2	6	102517012	T	11		1	6	TT/-;T/-;T/-;T/-;T/-;-/T;T/-
7	PRDM1	6	106557172	T	10	x	1	6	T/-;T/-;-/T;T/-;T/-;TT/-;TT/-
7	SEC63	6	108189877	A	13		1	6	AAA/-;AA/-;AA/-;A/-;-/A;A/-;A/-
7	FOXO3	6	109005014	A	11		0	7	A/-;A/-;A/-;A/-;AA/-;A/-;A/-
7	NUS1	6	118029806	T	11		1	6	T/-;T/-;-/T;T/-;T/-;T/-;T/-
7	SLC2A12	6	134312046	T	11		0	7	T/-;T/-;T/-;T/-;T/-;T/-;T/-
7	PHACTR2	6	144147193	A	15		0	7	A/-;AA/-;AA/-;AA/-;A/-;A/-;A/-
7	SAMD5	6	147890356	A	16		0	7	AAA/-;AA/-;A/-;A/-;AA/-;AAAAAA/-;AAA/-
7	AKAP12	6	151678845	T	21		0	7	TTTTTT/-;TTTTTT/-;TTTT/-;TTTTTT/-;TTTTT/-;TTTTT/-;TTTTTT/-
7	C6orf97	6	151940138	A	27		1	6	AAAAAAAAAA/-;AAAAAAAAA/-;AAAAA/-;-/AA;AAA/-;AAAA/-;AAAAAAAAAAA/-
7	IPCEF1	6	154476150	A	12		0	7	A/-;A/-;A/-;A/-;A/-;A/-;A/-
7	TULP4	6	158929911	T	27		0	7	TTTTTTTTTTTTTTT/-;TTTTTTTTT/-;TTTTTTTT/-;TTTTTT/-;TTTTTTTT/-;TTTTTT/-;TTTTTTTTTTTTT/-
7	TMEM106B	7	12272862	T	15		2	5	TT/-;T/-;-/TTG;-/TG;T/-;TTTTT/-;T/-
7	AHR	7	17384254	T	18		0	7	TTT/-;T/-;TTT/-;TTT/-;TTT/-;TTTTT/-;TT/-
7	C7orf46	7	23741877	T	11		2	5	T/-;T/-;T/-;-/T;T/-;T/-;-/T
7	CREB5	7	28859615	A	14		0	7	AAA/-;A/-;A/-;AA/-;A/-;A/-;AAA/-
7	PURB	7	44920831	A	9		1	6	A/-;-/A;A/-;A/-;A/-;A/-;A/-
7	ZNF273	7	64390206	T	13		1	6	T/-;T/-;-/T;T/-;T/-;T/-;T/-
7	ZNF273	7	64390616	T	11		0	7	T/-;T/-;T/-;T/-;T/-;T/-;T/-
7	CALN1	7	71249417	T	10		0	7	T/-;T/-;T/-;T/-;T/-;T/-;T/-
7	HIP1	7	75166839	A	11	x	2	5	-/A;A/-;-/AA;A/-;A/-;A/-;A/-
7	RUNDC3B	7	87460392	T	13		0	7	TTT/-;TT/-;TTT/-;TT/-;T/-;TT/-;T/-
7	STEAP4	7	87907378	A	13		0	7	AAA/-;AA/-;A/-;AAA/-;AA/-;AA/-;AA/-
7	PON3	7	94989256	T	17		1	6	T/-;-/T;TT/-;TT/-;TTTTT/-;TTTT/-;TTT/-
7	TRRAP	7	98610831	T	11		1	6	TT/-;T/-;-/T;T/-;T/-;T/-;TT/-
7	ATXN7L1	7	105245490	T	24		0	7	TTTTTTT/-;TTTTTTTTT/-;TTTT/-;TTTTTTTT/-;TTTTTTTTTTTTTTT/-;TTTTTTTTTTTTT/-;TTTTTTTTTTTTT/-
7	MDFIC	7	114659064	T	12		0	7	TTT/-;T/-;TT/-;T/-;T/-;T/-;T/-
7	LRRC4	7	127668233	T	9		1	6	T/-;T/-;T/-;TT/-;T/-;T/-;-/T
7	PTN	7	136912215	A	13		2	5	A/-;A/-;A/-;-/A;A/-;-/A;AA/-
7	TMEM213	7	138490614	T	13		0	7	TT/-;T/-;T/-;T/-;TT/-;TT/-;T/-
7	KIAA1549	7	138516937	T	20	x	0	7	TTTTTT/-;TTTTTT/-;TTTT/-;TTT/-;TTTT/-;TT/-;TTTTTT/-
7	ZC3HAV1L	7	138711009	A	11		2	5	A/-;A/-;A/-;-/AA;-/A;A/-;A/-
7	CLEC5A	7	141627862	T	12		0	7	T/-;TT/-;T/-;TT/-;T/-;T/-;TT/-
7	CASP2	7	143003343	T	25		0	7	TTTTTTTTTTTT/-;TTTTTT/-;TTTTT/-;TTTT/-;TTT/-;TTTTTT/-;TTTTTTTTT/-
7	CLN8	8	1729702	T	14		0	7	TT/-;T/-;TT/-;T/-;T/-;T/-;T/-
7	PCM1	8	17885372	T	13	x	0	7	TTT/-;TT/-;TTTT/-;T/-;TT/-;TT/-;TTTT/-
7	ASAH1	8	17914872	A	10		0	7	AA/-;A/-;AA/-;A/-;A/-;A/-;A/-
7	EGR3	8	22545638	T	11		0	7	TT/-;T/-;T/-;T/-;T/-;T/-;T/-
7	BNIP3L	8	26268446	A	10		2	5	A/-;A/-;A/-;-/A;-/A;A/-;A/-
7	DPYSL2	8	26513300	T	13		0	7	TTTG/-;T/-;TTG/-;T/-;T/-;TT/-;TTTG/-
7	ZNF395	8	28205777	T	27		0	7	TTTTTTTTTT/-;TTTTTTT/-;TTTTT/-;TTTTT/-;TTTTT/-;TTTTTTTTTTT/-;TTTTTTT/-
7	GSR	8	30536667	A	19		0	7	AAA/-;AAAA/-;AA/-;AAA/-;A/-;AAAAA/-;AAAAA/-
7	RB1CC1	8	53536113	A	11		1	6	A/-;A/-;-/AA;A/-;A/-;AA/-;A/-
7	OPRK1	8	54139818	A	21		0	7	AAAAAAAAA/-;AAAA/-;AAAAAA/-;AA/-;AAAAA/-;A/-;AAAAAA/-
7	PEX2	8	77895047	A	14		0	7	A/-;A/-;A/-;A/-;A/-;AA/-;A/-
7	CHMP4C	8	82671243	A	12		2	5	AA/-;A/-;-/A;-/A;A/-;A/-;AA/-
7	RALYL	8	85833389	T	10		3	4	T/-;-/T;-/T;T/-;T/-;-/T;T/-
7	TMEM64	8	91637754	A	12		0	7	A/-;A/-;A/-;A/-;AA/-;A/-;A/-
7	CCNE2	8	95892993	A	11		0	7	A/-;A/-;A/-;A/-;A/-;A/-;AA/-
7	TP53INP1	8	95941647	A	13		0	7	A/-;A/-;A/-;AA/-;A/-;A/-;A/-
7	MTDH	8	98740105	A	10		0	7	AA/-;A/-;A/-;A/-;A/-;A/-;A/-
7	SAMD12	8	119202186	A	23		0	7	AAAAAA/-;AAA/-;AAAAAA/-;AAAAAAA/-;AAAAAA/-;AA/-;AAAAAA/-
7	FAM91A1	8	124826584	T	12		0	7	T/-;T/-;T/-;T/-;TT/-;T/-;T/-
7	PLAA	9	26904509	T	10		0	7	T/-;T/-;T/-;T/-;T/-;T/-;T/-
7	MOB3B	9	27328388	A	13		0	7	AAA/-;A/-;A/-;A/-;A/-;A/-;AA/-
7	BAG1	9	33253980	T	12		0	7	T/-;TT/-;T/-;T/-;T/-;T/-;T/-
7	KLF9	9	73002116	T	11		1	6	TT/-;T/-;T/-;T/-;-/T;T/-;T/-
7	GDA	9	74866561	T	12		0	7	T/-;T/-;T/-;T/-;T/-;T/-;T/-
7	ZFAND5	9	74968285	A	10		4	3	A/-;A/-;-/A;-/A;-/A;A/-;-/A
7	CENPP,IPPK	9	95377436	A	11		2	5	-/A;A/-;A/-;A/-;-/A;AA/-;A/-
7	FAM120A	9	96327977	A	13		0	7	A/-;A/-;AAA/-;A/-;AA/-;AA/-;A/-
7	PALM2	9	112708968	A	25		0	7	AAAAAAAAA/-;AAAA/-;AAAAAAAA/-;AAAA/-;AAAAAA/-;AAAAAAAAAAA/-;AAAAAAA/-
7	FBXW2	9	123524090	A	12		0	7	A/-;A/-;A/-;A/-;A/-;A/-;A/-
7	STOM	9	124103031	A	15		0	7	AAAA/-;A/-;AA/-;A/-;AAAA/-;A/-;AAG/-
7	SCAI	9	127706580	T	16		0	7	TTTT/-;TTTT/-;TTTT/-;T/-;T/-;TTTTT/-;TTT/-
7	SET	9	131457014	T	24	x	0	7	TTTTTTTTTTTT/-;TTTTTTT/-;TTTTTTTTTT/-;TTTTTTT/-;TTTTTTT/-;TTTTTTT/-;TTTTTTTTT/-
7	BRD3	9	136897963	T	15	x	0	7	T/-;TTTT/-;TTT/-;T/-;TTTA/-;TTTA/-;TTT/-
7	CACNA1B	9	141018876	A	14		1	6	AAA/-;AAA/-;A/-;A/-;A/-;-/A;AA/-
7	ARL5B	10	18964316	T	11		0	7	TT/-;T/-;T/-;T/-;T/-;T/-;T/-
7	C10orf140	10	21803422	A	17		2	5	AAA/-;AA/-;AAA/-;AA/-;-/AA;AAA/-;-/A
7	OTUD1	10	23730497	T	10		1	6	-/TT;T/-;T/-;T/-;T/-;T/-;T/-
7	WAC	10	28908890	A	19		0	7	TAA/-;A/-;AA/-;TA/-;AAAAA/-;AAA/-;TAA/-
7	SAR1A	10	71910316	A	10		0	7	AA/-;A/-;A/-;A/-;A/-;A/-;A/-
7	PRF1	10	72357600	A	16	x	0	7	AAAAA/-;A/-;AA/-;AA/-;AAA/-;AA/-;AA/-
7	CPEB3	10	93809827	A	11		2	5	AA/-;A/-;-/A;A/-;A/-;A/-;-/A
7	HIF1AN	10	102309511	T	15		1	6	T/-;TTT/-;T/-;T/-;T/-;-/T;T/-
7	FGF8	10	103529899	A	23		0	7	TAAAAAAAAA/-;AAAAAAAAA/-;AAAA/-;AAAAAAA/-;AAAAAAAAA/-;TAAAAA/-;TAA/-
7	SORCS1	10	108333636	A	11		0	7	A/-;A/-;A/-;A/-;A/-;A/-;A/-
7	WEE1	11	9610822	T	13		0	7	TTT/-;TT/-;TT/-;TT/-;TTT/-;TT/-;TT/-
7	TPH1	11	18042322	A	11		0	7	A/-;A/-;A/-;A/-;A/-;A/-;A/-
7	LIN7C	11	27517704	A	14		1	6	AA/-;A/-;AA/-;-/A;A/-;AAA/-;AA/-
7	PTPRJ	11	48189154	T	13		0	7	TTT/-;TT/-;TTT/-;T/-;TTT/-;TT/-;TTT/-
7	MTA2	11	62360912	A	27		0	7	AAAAAAAAAA/-;AAAAAA/-;AAAAAAAA/-;AAAAAAA/-;AAAA/-;AAAAAAAAAAAA/-;AAAAAAAAAAAAA/-
7	FCHSD2	11	72548511	A	14		0	7	AAAAA/-;AA/-;AA/-;A/-;AAA/-;A/-;AA/-
7	USP35	11	77925425	G	11		3	4	TG/-;-/GT;-/C;TGG/-;-/GT;TG/-;TG/-
7	CREBZF	11	85372371	A	11		0	7	A/-;A/-;A/-;AA/-;A/-;A/-;A/-
7	SLC36A4	11	92881234	T	12		1	6	T/-;T/-;TT/-;-/T;T/-;T/-;TT/-
7	JRKL	11	96126289	T	19		0	7	TTTTTTTT/-;TTT/-;TTT/-;T/-;TT/-;TTTTT/-;TTTTTT/-
7	AASDHPPT	11	105967765	A	11		0	7	A/-;A/-;A/-;A/-;A/-;A/-;A/-
7	AASDHPPT	11	105969251	T	12		1	6	TTT/-;TT/-;-/T;T/-;TT/-;TTT/-;TT/-
7	ALG9	11	111655442	A	11		2	5	-/A;A/-;A/-;A/-;-/A;A/-;A/-
7	CBL	11	119175341	T	14	x	1	6	TT/-;TT/-;T/-;-/T;T/-;T/-;TT/-
7	SORL1	11	121500401	A	14		1	6	AAAAA/-;AA/-;A/-;AA/-;-/A;AAA/-;AAA/-
7	JAM3	11	134020536	T	12		0	7	TT/-;T/-;T/-;TT/-;T/-;T/-;T/-
7	NRIP2	12	2935371	A	15		0	7	AAAAAA/-;A/-;AA/-;A/-;A/-;AAAAA/-;AAAA/-
7	SCAF11	12	46314391	A	13		0	7	AAA/-;AA/-;A/-;A/-;A/-;A/-;AAA/-
7	PCBP2	12	53873456	T	12		7	0	-/TTTTTTTTTTTTTGG;-/TTTTTTTTTTGG;-/TTTTTTTTTTTTTGT;-/TTTTTTTTTTTTTTGG;-/TTTTTTTTTTTTGG;-/TTTTTTTTTTTGG;-/TTTTTTTTTTGG
7	CBX5	12	54627963	A	28		0	7	AAA/-;AAAAAA/-;AAAAAAAA/-;AAAAAA/-;AAAAAAAAA/-;AAAAAAAAAAAAA/-;AAAAAAAAAAA/-
7	GDF11	12	56146165	G	10		0	7	G/-;G/-;G/-;G/-;G/-;G/-;G/-
7	WIBG	12	56295237	A	16		0	7	AA/-;AA/-;TA/-;AAA/-;A/-;A/-;AA/-
7	SLC16A7	12	60173984	A	11		1	6	A/-;AA/-;A/-;A/-;-/A;A/-;A/-
7	C12orf66	12	64587316	A	10		0	7	A/-;A/-;A/-;A/-;A/-;A/-;A/-
7	HMGA2	12	66358069	A	12	x	0	7	AAG/-;A/-;AAG/-;AA/-;AAG/-;A/-;AA/-
7	TMBIM4	12	66531179	T	16		0	7	T/-;AT/-;T/-;T/-;T/-;TT/-;T/-
7	DYRK2	12	68055577	T	10		0	7	T/-;T/-;T/-;T/-;T/-;T/-;T/-
7	MDM2	12	69233887	T	11	x	0	7	TT/-;T/-;T/-;T/-;T/-;T/-;T/-
7	PHLDA1	12	76421758	T	12		0	7	TT/-;T/-;T/-;T/-;T/-;T/-;T/-
7	NAP1L1	12	76440269	A	11		0	7	A/-;A/-;A/-;A/-;A/-;A/-;A/-
7	NAP1L1	12	76441882	A	14		0	7	AAA/-;A/-;A/-;A/-;AA/-;A/-;AAA/-
7	TMTC3	12	88590178	T	12		0	7	T/-;T/-;T/-;T/-;T/-;T/-;TT/-
7	TMTC3	12	88591037	T	25		0	7	TTT/-;TTTTTTTT/-;TTTTT/-;TTT/-;TTTT/-;TTTTTTTTTTT/-;TTTTTT/-
7	GNPTAB	12	102140523	A	11		1	6	AA/-;A/-;A/-;A/-;A/-;A/-;-/A
7	IGF1	12	102790989	A	11		0	7	A/-;A/-;A/-;A/-;A/-;A/-;A/-
7	CKAP4	12	106632441	T	14		0	7	TT/-;T/-;T/-;TT/-;T/-;TT/-;T/-
7	ANKRD13A	12	110476874	T	12		0	7	T/-;TT/-;T/-;T/-;T/-;TT/-;T/-
7	PTPN11	12	112944241	T	12	x	0	7	TT/-;TT/-;TT/-;TT/-;T/-;TT/-;TT/-
7	SUDS3	12	118855483	T	15		1	6	TTTT/-;TTTT/-;TT/-;T/-;-/T;TTT/-;TT/-
7	MSI1	12	120779262	A	14		0	7	A/-;A/-;AA/-;AA/-;A/-;A/-;AA/-
7	RNF10	12	121014988	T	11		0	7	T/-;T/-;T/-;T/-;T/-;T/-;T/-
7	BCL7A	12	122499828	T	14	x	0	7	TTT/-;T/-;T/-;T/-;T/-;T/-;T/-
7	LATS2	13	21548563	T	13		0	7	TT/-;T/-;T/-;T/-;TTT/-;T/-;T/-
7	FGF9	13	22277775	T	10		1	6	T/-;T/-;T/-;T/-;-/T;T/-;T/-
7	SHISA2	13	26619922	A	11		1	6	AA/-;A/-;-/AA;A/-;A/-;A/-;A/-
7	CLYBL	13	100546991	G	15		0	7	GGGGGG/-;GGGGT/-;GGGGG/-;GGT/-;GGGG/-;GGGGGG/-;GGGGG/-
7	SOX1	13	112724862	A	10		0	7	A/-;A/-;A/-;A/-;A/-;A/-;A/-
7	CHD8	14	21853630	T	15		0	7	TTTTT/-;TT/-;TTTT/-;T/-;TTT/-;TTT/-;T/-
7	HOMEZ	14	23744115	A	14		2	5	A/-;AA/-;-/A;A/-;A/-;-/A;A/-
7	KHNYN	14	24908392	T	11		0	7	T/-;T/-;T/-;T/-;TT/-;TT/-;T/-
7	C14orf28	14	45376125	A	12		0	7	A/-;A/-;A/-;A/-;A/-;A/-;A/-
7	PRPF39	14	45584495	T	18		0	7	TTTTT/-;TTT/-;TT/-;TT/-;TT/-;T/-;TTTTTT/-
7	PELI2	14	56767165	T	14		0	7	T/-;TTT/-;T/-;TTT/-;T/-;T/-;T/-
7	C14orf43	14	74183386	A	27		0	7	AAAAAAAAAT/-;AAAAAA/-;AAT/-;AAAAAA/-;AAAAAAA/-;AAAAAAAA/-;AAAAAAAA/-
7	FCF1	14	75202274	T	14		0	7	T/-;T/-;T/-;T/-;T/-;T/-;TT/-
7	KIAA1737	14	77582033	T	14		0	7	TTT/-;TT/-;TT/-;T/-;TT/-;T/-;TTT/-
7	SPTLC2	14	77975646	A	11		1	6	AA/-;A/-;A/-;A/-;-/A;A/-;A/-
7	SEL1L	14	81940589	A	15		0	7	AAAAA/-;AA/-;AA/-;A/-;AAA/-;AAA/-;AA/-
7	FOXN3	14	89627729	T	15		0	7	T/-;T/-;T/-;TTT/-;T/-;T/-;T/-
7	SMEK1	14	91924529	A	11		0	7	A/-;AA/-;A/-;A/-;A/-;A/-;A/-
7	PPP4R4	14	94745084	T	11		1	6	T/-;T/-;T/-;T/-;-/T;TT/-;TT/-
7	CLMN	14	95657744	A	15		1	6	A/-;AA/-;A/-;A/-;-/A;AAA/-;AAAAAA/-
7	CHP	15	41572704	T	27		1	6	TTTTTTTTT/-;TT/-;TTTTTT/-;-/TTTT;TTTTTT/-;TTTTTT/-;TTTTTTTTTTT/-
7	ZSCAN29	15	43650560	T	14		0	7	TTT/-;T/-;TT/-;T/-;TT/-;TT/-;TT/-
7	GABPB1	15	50569632	A	12		1	6	A/-;A/-;A/-;A/-;-/A;A/-;A/-
7	TMOD2	15	52102948	T	17		0	7	TT/-;TTTT/-;TT/-;TT/-;TT/-;TT/-;T/-
7	TMOD3	15	52201131	T	10		1	6	TT/-;T/-;-/T;T/-;T/-;T/-;TT/-
7	APH1B	15	63600288	T	12		0	7	TT/-;T/-;T/-;T/-;T/-;TT/-;T/-
7	AAGAB	15	67493516	T	14		0	7	T/-;TT/-;T/-;T/-;TT/-;T/-;T/-
7	PAQR5	15	69699209	A	16		1	6	AAA/-;A/-;A/-;A/-;A/-;-/A;A/-
7	ARIH1	15	72877868	A	12		0	7	AA/-;A/-;AA/-;A/-;A/-;A/-;A/-
7	ADCY9	16	4013844	A	11		0	7	AA/-;A/-;A/-;A/-;A/-;A/-;A/-
7	GSPT1	16	11966239	A	14		0	7	AA/-;A/-;A/-;AAA/-;A/-;A/-;A/-
7	BFAR	16	14762693	A	16		0	7	AAAAA/-;AAAAA/-;AAA/-;A/-;AAA/-;A/-;AAAAAA/-
7	MPV17L	16	15502459	T	21		1	6	TTTTTTTT/-;TT/-;TTTT/-;TT/-;TTTTTT/-;-/TT;TTTTT/-
7	XYLT1	16	17199776	A	11		2	5	A/-;-/AA;-/A;A/-;A/-;A/-;AAA/-
7	COQ7	16	19089611	T	13		0	7	TT/-;T/-;T/-;TT/-;TT/-;TT/-;TT/-
7	TNRC6A	16	24836091	A	17		1	6	AAA/-;AA/-;AA/-;A/-;A/-;A/-;-/A
7	SBK1	16	28334645	A	13		0	7	A/-;AA/-;A/-;A/-;A/-;AAA/-;AA/-
7	C16orf53	16	29833643	A	13		0	7	A/-;A/-;A/-;A/-;AA/-;A/-;A/-
7	PHKB	16	47734579	A	10		0	7	A/-;A/-;A/-;A/-;A/-;A/-;A/-
7	DYNC1LI2	16	66757488	T	16		0	7	TTTT/-;T/-;TT/-;TTT/-;TT/-;T/-;T/-
7	PDP2	16	66920309	T	10		0	7	T/-;T/-;T/-;T/-;T/-;T/-;T/-
7	YWHAE	17	1248584	A	18	x	2	5	AA/-;AAA/-;A/-;-/AA;A/-;-/A;AA/-
7	TLCD2	17	1608004	T	11		1	6	T/-;T/-;T/-;-/T;T/-;T/-;T/-
7	PITPNM3	17	6355194	C	12		2	5	CCCCG/-;-/CG;C/-;-/C;CG/-;CC/-;CG/-
7	USP43	17	9632428	T	13		0	7	TT/-;TTT/-;TT/-;TT/-;T/-;T/-;TTT/-
7	MYOCD	17	12668632	A	15		1	6	AA/-;A/-;A/-;AA/-;A/-;A/-;-/A
7	WSB1	17	25640465	A	17		1	6	A/-;A/-;A/-;-/A;A/-;A/-;AAA/-
7	TMEM97	17	26653991	T	16		1	6	TTTT/-;TTT/-;TTT/-;TT/-;T/-;-/T;TTT/-
7	SARM1	17	26726914	T	12		0	7	T/-;T/-;TT/-;T/-;T/-;T/-;TTT/-
7	NUFIP2	17	27583683	A	13		0	7	A/-;A/-;A/-;A/-;A/-;A/-;AA/-
7	NUFIP2	17	27584537	T	12		1	6	TT/-;-/T;T/-;T/-;T/-;TT/-;T/-
7	GOSR1	17	28849612	A	16		1	6	A/-;AAA/-;A/-;A/-;AAAA/-;-/A;A/-
7	SUZ12	17	30326764	T	12	x	1	6	TT/-;T/-;-/T;TT/-;T/-;T/-;T/-
7	PSMD11	17	30807997	A	11		0	7	A/-;A/-;A/-;A/-;A/-;A/-;A/-
7	UNC45B	17	33515487	T	19		0	7	TTTTTTTT/-;TTTTT/-;TTTTT/-;TTTT/-;TTT/-;T/-;TTTT/-
7	SLC35G3	17	33519800	T	15		1	6	TTTT/-;TTT/-;-/T;TT/-;T/-;TTTTTT/-;T/-
7	MED1	17	37562813	T	16		1	6	-/T;TT/-;TTT/-;T/-;TT/-;T/-;TT/-
7	SOST	17	41831362	T	11		0	7	T/-;T/-;T/-;T/-;T/-;T/-;T/-
7	DUSP3	17	41843864	T	16		0	7	TTTT/-;TT/-;TTTTT/-;TT/-;TT/-;T/-;T/-
7	GJC1	17	42878302	A	15		0	7	AAAA/-;AAA/-;A/-;AAA/-;AA/-;AAA/-;A/-
7	GJC1	17	42878976	T	13		1	6	TT/-;T/-;TT/-;T/-;T/-;T/-;-/T
7	GJC1	17	42881669	A	12		0	7	A/-;A/-;A/-;A/-;A/-;A/-;AA/-
7	IGF2BP1	17	47133199	T	22		0	7	TTTTTTTT/-;TT/-;TTTT/-;TT/-;TTTT/-;TT/-;TTTTTTTTT/-
7	SPOP	17	47677368	T	12		0	7	T/-;T/-;T/-;TT/-;T/-;T/-;T/-
7	MBTD1	17	49256737	T	13		0	7	TT/-;TTTA/-;TTT/-;T/-;T/-;T/-;TT/-
7	COIL	17	55016355	A	14		1	6	A/-;-/A;AA/-;A/-;AAA/-;AA/-;AA/-
7	SMURF2	17	62541186	T	13		0	7	TT/-;T/-;TTT/-;TT/-;TT/-;TA/-;T/-
7	SMURF2	17	62541835	A	17		1	6	AAAAGGGG/-;AAAAAGGG/-;AAAGGG/-;-/AAA;AAAAGGGG/-;AAAAGGG/-;AAAAAAAGGGG/-
7	GNA13	17	63005678	A	10		0	7	A/-;A/-;A/-;A/-;A/-;A/-;A/-
7	HELZ	17	65073604	A	11		0	7	A/-;A/-;AA/-;A/-;A/-;A/-;AA/-
7	SLC16A6	17	66265043	A	11		0	7	A/-;AA/-;A/-;A/-;A/-;AA/-;A/-
7	FAM20A	17	66531811	T	13		1	6	TTTT/-;T/-;TT/-;-/T;TTT/-;TT/-;T/-
7	KCNJ2	17	68175918	A	10		0	7	A/-;A/-;A/-;A/-;A/-;A/-;A/-
7	CD300LB	17	72518441	A	11		0	7	A/-;A/-;A/-;A/-;A/-;A/-;A/-
7	SRSF2	17	74731488	A	10	x	0	7	AA/-;A/-;A/-;A/-;A/-;AA/-;A/-
7	USP14	18	212030	A	9		1	6	A/-;-/A;A/-;A/-;A/-;A/-;A/-
7	C18orf56	18	649880	T	15		0	7	TT/-;TTT/-;TTT/-;TTT/-;T/-;TTTTT/-;CTT/-
7	SPIRE1	18	12449301	T	11		0	7	T/-;T/-;T/-;T/-;T/-;T/-;T/-
7	SEH1L	18	12986727	T	14		0	7	TTTT/-;T/-;TTTT/-;T/-;T/-;TTT/-;TT/-
7	TTC39C	18	21715265	T	11		0	7	T/-;TTT/-;T/-;T/-;TT/-;T/-;T/-
7	TAF4B	18	23971327	A	13		0	7	A/-;A/-;A/-;A/-;AA/-;A/-;A/-
7	DTNA	18	32448119	A	16		0	7	AAAA/-;AAAA/-;AAAA/-;AA/-;A/-;AAAAAA/-;AAA/-
7	ZNF24	18	32917177	T	12		0	7	TT/-;T/-;T/-;T/-;T/-;TTT/-;T/-
7	RAX	18	56934864	C	14		0	7	CC/-;CC/-;CCCCC/-;CC/-;CCC/-;CCCC/-;CCCCC/-
7	CPLX4	18	56963030	A	10		0	7	A/-;A/-;A/-;A/-;A/-;A/-;A/-
7	KDSR	18	60998043	T	15		0	7	TT/-;TT/-;T/-;T/-;TTT/-;TT/-;TT/-
7	ZADH2	18	72910476	T	13		1	6	T/-;T/-;TT/-;T/-;-/T;T/-;T/-
7	TRIP10	19	6751496	A	12		1	6	AAA/-;A/-;A/-;-/A;A/-;AA/-;AA/-
7	TNPO2	19	12810471	T	16		0	7	TT/-;TTT/-;T/-;TTTT/-;TT/-;TT/-;T/-
7	NFIX	19	13207765	A	13		0	7	A/-;A/-;AA/-;AA/-;AA/-;A/-;AAAA/-
7	GATAD2A	19	19617424	T	13		1	6	TT/-;TTT/-;-/T;T/-;T/-;T/-;TT/-
7	ZNF737	19	20722095	A	14		0	7	AAA/-;A/-;A/-;A/-;A/-;AAAA/-;A/-
7	ZNF737	19	20723567	A	11		0	7	AA/-;A/-;A/-;A/-;A/-;A/-;AA/-
7	ZNF566	19	36937923	T	17		0	7	TT/-;T/-;T/-;T/-;TTT/-;T/-;TTT/-
7	ZNF585A	19	37641929	T	11		1	6	T/-;T/-;T/-;-/T;T/-;T/-;TT/-
7	CDS2	20	5170988	T	16		0	7	TTTTTTTT/-;TTT/-;TTTT/-;TTT/-;TTT/-;TT/-;T/-
7	PCSK2	20	17463029	T	11		0	7	T/-;T/-;TT/-;T/-;T/-;T/-;T/-
7	C20orf72	20	17971054	G	13		0	7	GG/-;GG/-;GGG/-;GGG/-;GGGG/-;GGG/-;GGG/-
7	NCOA3	20	46282985	T	11		0	7	T/-;T/-;T/-;T/-;T/-;T/-;T/-
7	CDH4	20	60512277	A	19		0	7	AAA/-;AA/-;AAAA/-;AAAAA/-;AAA/-;AAAAA/-;AAAA/-
7	ADAMTS5	21	28291547	T	14		0	7	TTTT/-;TTT/-;T/-;T/-;TT/-;T/-;TTT/-
7	HLCS	21	38123321	A	11		0	7	A/-;A/-;A/-;A/-;A/-;A/-;A/-
7	C21orf33	21	45564932	T	12		1	6	TT/-;TT/-;TTT/-;TTT/-;TTT/-;TT/-;-/T
7	MAPK1	22	22114393	C	11		0	7	C/-;C/-;C/-;C/-;C/-;C/-;C/-
7	ASPHD2	22	26840194	T	13		3	4	TT/-;-/T;TT/-;-/T;-/T;T/-;TT/-
7	NF2	22	30092785	T	14	x	1	6	TTT/-;T/-;T/-;T/-;T/-;-/T;T/-
7	YWHAH	22	32353392	T	14		1	6	TT/-;TT/-;TT/-;-/T;T/-;TT/-;TT/-
7	SLC5A1	22	32506614	T	10		0	7	T/-;T/-;T/-;T/-;T/-;T/-;T/-
7	MKL1	22	40806782	C	9	x	5	2	-/CC;-/C;-/C;C/-;C/-;-/C;-/CC
7	DNAJB7	22	41256661	T	14		0	7	TTT/-;T/-;TTT/-;TT/-;TT/-;T/-;TT/-
7	TOB2	22	41832050	A	12		0	7	A/-;A/-;A/-;A/-;A/-;A/-;AAA/-
7	PNPLA3	22	44342942	A	13		1	6	A/-;-/AA;A/-;AA/-;AA/-;AAA/-;AA/-
7	CELSR1	22	46756849	A	11		0	7	AA/-;AA/-;A/-;AA/-;A/-;A/-;AA/-
7	STS	X	7269977	A	18		0	7	AAAA/-;AAAA/-;A/-;A/-;A/-;A/-;AA/-
7	SMS	X	22012650	T	10		2	5	T/-;-/T;T/-;T/-;T/-;-/TT;T/-
7	TAB3	X	30848571	A	10		0	7	A/-;A/-;A/-;A/-;A/-;A/-;AA/-
7	DMD	X	31196550	T	15		0	7	TTTTTC/-;TTTT/-;TC/-;T/-;TT/-;TTTTC/-;TTTTT/-
7	CASK	X	41377810	A	11		0	7	A/-;A/-;A/-;A/-;A/-;A/-;A/-
7	USP11	X	47107351	A	16		0	7	AAAAAA/-;A/-;A/-;AA/-;AA/-;AAA/-;AAAA/-
7	WNK3	X	54224161	A	16		2	5	AA/-;AAA/-;-/AA;-/A;AAA/-;AA/-;AAAAA/-
7	GNL3L	X	54587505	A	22		0	7	AAAAAAA/-;AAA/-;AAAA/-;AAAAAAA/-;AAAAAA/-;AAAAA/-;AAAAAAA/-
7	ATP7A	X	77302386	A	11		1	6	A/-;A/-;-/A;AA/-;AA/-;A/-;A/-
7	TAF9B	X	77386680	A	13		2	5	ATT/-;A/-;A/-;-/A;A/-;AA/-;-/A
7	HNRNPH2,RPL36A-HNRNPH2	X	100668933	T	13		0	7	T/-;TT/-;TTT/-;TT/-;TTT/-;T/-;TT/-
7	DCX	X	110539994	A	20		0	7	AAAAAAA/-;AAAAA/-;AA/-;AAAA/-;AA/-;AAAA/-;AAA/-
7	DCX	X	110543845	T	16		0	7	TTTT/-;T/-;TTT/-;TT/-;TT/-;TT/-;TTTT/-
7	XIAP	X	123046090	A	12		0	7	AA/-;A/-;AA/-;A/-;AA/-;AA/-;AT/-
7	PHF6	X	133561521	T	10	x	1	6	T/-;T/-;T/-;T/-;-/T;T/-;T/-
7	ATP11C	X	138809823	A	10		2	5	A/-;A/-;A/-;-/A;-/A;A/-;A/-
6	CCNL2	1	1327870	T	9		1	5	T/-;T/-;T/-;T/-;T/-;-/TT
6	SLC35E2	1	1663681	A	15		0	6	AAAAAGT/-;AAG/-;AAAG/-;AA/-;AA/-;AG/-
6	SKI	1	2240044	T	10		2	4	T/-;T/-;-/T;-/T;T/-;TT/-
6	CEP104	1	3729819	T	13		1	5	T/-;-/T;TT/-;T/-;T/-;T/-
6	C1orf174	1	3806265	A	21		0	6	AAAAAAAA/-;AAA/-;AA/-;AA/-;AAAAAAAAAA/-;AAAAAA/-
6	AJAP1	1	4843661	T	11		0	6	T/-;T/-;T/-;T/-;T/-;T/-
6	FBLIM1	1	16112131	A	10		1	5	A/-;A/-;A/-;-/A;AA/-;A/-
6	HP1BP3	1	21070972	A	10		0	6	A/-;A/-;A/-;A/-;A/-;A/-
6	ECE1	1	21546033	A	10		0	6	A/-;A/-;A/-;A/-;A/-;A/-
6	E2F2	1	23834008	A	15		0	6	AAA/-;AA/-;AAA/-;A/-;AAA/-;A/-
6	NIPAL3	1	24798069	A	20		1	5	AAAAAA/-;A/-;AA/-;AAAA/-;AAA/-;-/AA
6	NIPAL3	1	24798499	T	18		0	6	TTTTTT/-;T/-;TTTTT/-;TTTT/-;T/-;TT/-
6	NIPAL3	1	24799399	A	12		0	6	AAA/-;A/-;A/-;A/-;A/-;A/-
6	PDIK1L	1	26449196	T	10		1	5	T/-;T/-;T/-;-/T;T/-;T/-
6	PDIK1L	1	26451996	T	10		1	5	T/-;T/-;T/-;T/-;T/-;-/T
6	DHDDS	1	26796807	T	17		1	5	TT/-;TT/-;T/-;TTTT/-;-/T;TTTT/-
6	ARID1A	1	27107651	A	18	x	0	6	A/-;AAAA/-;AAA/-;A/-;AA/-;AAAAAAAA/-
6	TXLNA	1	32661579	T	15		0	6	TT/-;TTT/-;T/-;TT/-;T/-;TTTT/-
6	ZBTB8A	1	33066655	A	14		0	6	AA/-;A/-;AAA/-;AA/-;A/-;AA/-
6	ZNF362	1	33764951	T	12		0	6	TTT/-;T/-;T/-;T/-;TT/-;TT/-
6	SFPQ	1	35649755	A	13	x	0	6	A/-;AA/-;AAA/-;A/-;AA/-;AAA/-
6	COL8A2	1	36561053	A	10		1	5	A/-;A/-;A/-;-/A;A/-;A/-
6	POU3F1	1	38510268	T	18		0	6	TT/-;TTTT/-;T/-;TT/-;TTTTT/-;TTTT/-
6	HIVEP3	1	41975891	T	10		0	6	T/-;T/-;T/-;T/-;T/-;T/-
6	CC2D1B	1	52817556	A	22		0	6	AAA/-;AAAA/-;AAAA/-;AAA/-;AAAA/-;AAA/-
6	ZYG11B	1	53290311	A	13		0	6	AA/-;AA/-;A/-;A/-;AAA/-;A/-
6	SSBP3	1	54692341	T	15		0	6	TTTT/-;TT/-;TT/-;T/-;TTT/-;TTT/-
6	KANK4	1	62702804	T	17		0	6	TTTTT/-;TTTTTTT/-;TTTTT/-;TTT/-;TTTT/-;TTTT/-
6	AK4	1	65692500	T	11		0	6	T/-;T/-;T/-;T/-;T/-;T/-
6	NEGR1	1	71869848	T	11		0	6	TT/-;T/-;T/-;T/-;T/-;T/-
6	SLC44A5	1	75668545	A	11		0	6	A/-;A/-;A/-;A/-;A/-;A/-
6	LMO4	1	87811175	A	11		0	6	A/-;A/-;AA/-;A/-;A/-;A/-
6	LMO4	1	87813144	A	11		0	6	A/-;A/-;A/-;A/-;A/-;A/-
6	RBMXL1	1	89446108	T	14		0	6	TT/-;T/-;TTT/-;T/-;T/-;TTT/-
6	EVI5	1	92978705	A	11		0	6	AAA/-;A/-;A/-;A/-;A/-;A/-
6	F3	1	94995630	A	24		0	6	AAAAAAAAAAA/-;AAAAAAAAA/-;AAAAAA/-;AAAAAA/-;AAA/-;AAAAAAAAA/-
6	HIAT1	1	100548279	A	11		0	6	A/-;A/-;A/-;A/-;A/-;A/-
6	DBT	1	100653257	T	17		0	6	TTTTTT/-;TT/-;TTT/-;T/-;TTTTT/-;TTTT/-
6	KIAA1324	1	109748645	T	11		1	5	T/-;T/-;T/-;T/-;T/-;-/T
6	AHCYL1	1	110564997	A	15		0	6	AAA/-;A/-;AAA/-;A/-;A/-;AA/-
6	ST7L	1	113066621	A	11		0	6	A/-;AA/-;A/-;A/-;A/-;A/-
6	RSBN1	1	114307238	T	15		2	4	-/T;TTT/-;T/-;TTT/-;-/T;TTTT/-
6	TRIM33	1	114940230	T	13	x	1	5	TTT/-;T/-;-/T;T/-;TTT/-;TTT/-
6	TRIM45	1	117654570	A	16		0	6	A/-;AG/-;AA/-;A/-;A/-;AAAA/-
6	GDAP2	1	118411745	T	10		0	6	TT/-;T/-;T/-;T/-;T/-;T/-
6	SEC22B	1	145116300	T	11		2	4	-/T;TTTTGTTTTTTTGTTTTTTTG/-;TTTGTTTTTTTGTTTTTTTG/-;TTGTTTTTTTGTTTTTTTG/-;-/T;T/-
6	ANP32E	1	150192507	A	22		0	6	AAAAA/-;AAA/-;AAAAAAAA/-;AA/-;AAAAAAAAA/-;AAAAA/-
6	PIP5K1A	1	151220868	T	11		0	6	T/-;T/-;TTT/-;T/-;T/-;T/-
6	TUFT1	1	151555415	T	13		0	6	TTT/-;TT/-;T/-;T/-;T/-;T/-
6	S100A4	1	153516163	A	10		0	6	A/-;A/-;A/-;A/-;A/-;A/-
6	GATAD2B	1	153782189	A	18		1	5	AA/-;AAA/-;A/-;AA/-;-/A;AAAAAA/-
6	SHC1	1	154935863	G	8		1	5	G/-;G/-;G/-;G/-;-/G;GC/-
6	SYT11	1	155851835	T	12		1	5	T/-;-/T;T/-;T/-;T/-;T/-
6	PIGM	1	159999683	T	17		1	5	TT/-;T/-;TT/-;-/T;T/-;TT/-
6	KLHL20	1	173754886	A	12		0	6	A/-;A/-;A/-;A/-;AA/-;A/-
6	RC3H1	1	173904710	A	11		0	6	A/-;A/-;A/-;A/-;A/-;A/-
6	RC3H1	1	173906657	A	14		2	4	A/-;-/AA;A/-;AA/-;AA/-;-/A
6	TOR1AIP1	1	179888401	A	12		0	6	AA/-;A/-;AA/-;A/-;A/-;A/-
6	RGL1	1	183897298	A	13		1	5	AA/-;A/-;AA/-;-/A;A/-;A/-
6	GLT25D2	1	183907344	A	6		0	6	AAA/-;AA/-;A/-;A/-;AA/-;AA/-
6	TROVE2	1	193054347	A	11		0	6	A/-;A/-;A/-;A/-;A/-;A/-
6	TROVE2	1	193054576	T	12		0	6	TTT/-;TT/-;T/-;T/-;T/-;T/-
6	MDM4	1	204524287	T	15	x	0	6	TT/-;TT/-;TT/-;T/-;TT/-;TT/-
6	DSTYK	1	205114654	T	11		1	5	TG/-;-/TTTT;TG/-;TTTTTG/-;TTTTTG/-;TTTG/-
6	DSTYK	1	205115702	T	16		1	5	TTT/-;TTT/-;T/-;T/-;-/T;TTT/-
6	FAIM3	1	207077643	T	18		0	6	TTTT/-;TTTT/-;TTTTT/-;T/-;T/-;TTTTT/-
6	RCOR3	1	211487677	T	10		1	5	-/T;T/-;T/-;T/-;T/-;TT/-
6	FLVCR1	1	213069475	T	13		1	5	TTT/-;T/-;T/-;-/C;T/-;TT/-
6	KCNK2	1	215408899	T	10		0	6	T/-;T/-;TT/-;T/-;T/-;T/-
6	RRP15	1	218506211	A	17		0	6	A/-;AA/-;AA/-;A/-;A/-;A/-
6	RRP15	1	218506527	A	10		0	6	A/-;A/-;A/-;A/-;A/-;A/-
6	TGFB2	1	218615928	T	10		0	6	T/-;T/-;T/-;T/-;TT/-;T/-
6	AIDA	1	222841525	T	10		1	5	T/-;T/-;-/T;T/-;TT/-;T/-
6	ZNF238	1	244219034	T	11		3	3	T/-;T/-;-/T;-/TT;T/-;-/T
6	HNRNPU	1	245014281	T	11		0	6	T/-;T/-;T/-;T/-;T/-;T/-
6	HNRNPU	1	245017465	A	14		0	6	AAAAA/-;AA/-;AA/-;AAAA/-;AA/-;AAAA/-
6	CNST	1	246830427	A	10		1	5	A/-;A/-;A/-;A/-;-/A;A/-
6	SOX11	2	5834799	T	32		0	6	TTTTTTTTTTTTTTTT/-;TTTTT/-;TTTTTTTTTT/-;TTTTTTTTTTTTTTT/-;TTTT/-;TTTTTTTTTTTTTT/-
6	SOX11	2	5834919	A	11		0	6	A/-;A/-;A/-;A/-;AA/-;A/-
6	SOX11	2	5838684	A	14		1	5	AA/-;AAA/-;A/-;A/-;A/-;-/A
6	ADAM17	2	9629855	A	24		0	6	AAAAAA/-;AAAAAAA/-;AAAAAA/-;AAAA/-;AAAAA/-;AAAAAAAAA/-
6	NOL10	2	10710967	A	12		0	6	AA/-;A/-;A/-;A/-;A/-;A/-
6	DNAJC27	2	25169545	T	12		0	6	T/-;TT/-;T/-;TT/-;T/-;T/-
6	EFR3B	2	25378727	T	13		0	6	T/-;T/-;TT/-;T/-;T/-;TT/-
6	WDR43	2	29170731	T	25		0	6	TTTTTTTTT/-;TT/-;TTTTT/-;TTTT/-;TT/-;TTTTTT/-
6	CYP1B1	2	38296986	T	10		0	6	T/-;T/-;T/-;T/-;T/-;T/-
6	PRKCE	2	46414945	T	12		0	6	TT/-;T/-;TT/-;T/-;T/-;TT/-
6	RHOQ	2	46809064	T	12		0	6	T/-;TT/-;T/-;T/-;TT/-;T/-
6	FOXN2	2	48604359	T	10		2	4	TT/-;-/T;-/T;T/-;T/-;TT/-
6	PSME4	2	54091571	A	12		0	6	AA/-;A/-;A/-;A/-;A/-;AA/-
6	RTN4	2	55199932	T	16		0	6	TTTT/-;TTTT/-;TTTTT/-;TT/-;T/-;T/-
6	PNPT1	2	55861396	T	16		0	6	TTTT/-;TT/-;TTT/-;T/-;TTTT/-;TTTTT/-
6	CEP68	2	65312946	A	12		0	6	A/-;A/-;A/-;AA/-;A/-;A/-
6	AAK1	2	69689809	A	16		0	6	AAA/-;A/-;AA/-;A/-;AA/-;A/-
6	MXD1	2	70167280	T	18		0	6	TTTTTT/-;TT/-;TTT/-;TT/-;T/-;TT/-
6	LRRTM1	2	80529042	A	14		0	6	AAA/-;A/-;A/-;AA/-;A/-;AA/-
6	KCMF1	2	85283237	A	13		0	6	AA/-;A/-;A/-;A/-;A/-;AAA/-
6	REEP1	2	86442147	T	23		0	6	TTTTTT/-;TTTTTTTT/-;TTTTTTT/-;T/-;TT/-;TTTTTT/-
6	ZNF2	2	95848210	T	11		1	5	T/-;T/-;T/-;TT/-;T/-;-/T
6	AFF3	2	100163958	T	14		0	6	TTT/-;TTT/-;TTT/-;TTT/-;T/-;TT/-
6	ZC3H6	2	113094880	T	15		0	6	TTTT/-;TT/-;T/-;TT/-;T/-;T/-
6	DDX18	2	118589333	A	9		2	4	-/A;A/-;A/-;-/A;A/-;A/-
6	ARL5A	2	152659119	T	14		2	4	T/-;-/T;TA/-;-/T;T/-;TTT/-
6	CACNB4	2	152695482	T	11		0	6	T/-;T/-;T/-;T/-;T/-;T/-
6	ACVR1C	2	158388886	T	17		0	6	T/-;TTT/-;TT/-;TT/-;T/-;TT/-
6	UBR3	2	170938525	T	12		1	5	T/-;TT/-;T/-;T/-;T/-;-/T
6	METTL8	2	172178473	T	17		0	6	TTTTT/-;T/-;TTT/-;TT/-;TTTT/-;TTTT/-
6	GPR155	2	175299038	T	13		0	6	T/-;T/-;TT/-;T/-;TT/-;T/-
6	KIAA1715	2	176793238	A	21		0	6	AAAAAAAA/-;AA/-;AAA/-;AA/-;AAAAAAAAAA/-;AAAAAAAA/-
6	HNRNPA3	2	178088126	A	12		0	6	AA/-;A/-;A/-;A/-;A/-;A/-
6	TTC30B	2	178415367	T	10		0	6	T/-;T/-;T/-;T/-;T/-;T/-
6	COQ10B	2	198339542	T	17		0	6	TTTT/-;TT/-;TTTT/-;T/-;TTTT/-;TTTTT/-
6	TYW5	2	200794278	T	19		0	6	TTTTTTT/-;TTTTTT/-;TTTTG/-;TTTTTT/-;TTTT/-;TTT/-
6	TRAK2	2	202244538	T	11		0	6	T/-;T/-;T/-;T/-;T/-;T/-
6	CYP20A1	2	204163759	A	10		0	6	A/-;A/-;A/-;A/-;A/-;A/-
6	ABI2	2	204292195	T	10		1	5	T/-;-/T;T/-;T/-;T/-;TT/-
6	PLEKHM3	2	208686454	A	10		0	6	A/-;AA/-;A/-;A/-;A/-;A/-
6	PLEKHM3	2	208688028	T	16		0	6	TTTT/-;TT/-;TT/-;TT/-;T/-;TT/-
6	ERBB4	2	212247968	A	18		0	6	AAA/-;AA/-;AA/-;AA/-;AAAA/-;AAAA/-
6	IGFBP5	2	217537241	A	11		1	5	A/-;A/-;A/-;-/A;A/-;A/-
6	IRS1	2	227600759	T	11		0	6	T/-;T/-;T/-;T/-;T/-;TT/-
6	TM4SF20	2	228228132	A	17		0	6	A/-;AAAA/-;AA/-;AA/-;A/-;AAA/-
6	HDAC4	2	239974110	A	9		0	6	A/-;A/-;A/-;A/-;A/-;A/-
6	ARPC4	3	9848201	T	21		0	6	TTTTTTTT/-;TTT/-;TTTTTT/-;TTTTT/-;TTTTTTTT/-;TTTTA/-
6	FANCD2	3	10143062	T	25	x	0	6	TTTTTTT/-;TTTTT/-;TTT/-;TTTT/-;TTTTTTT/-;TTTTTTTT/-
6	SLC6A6	3	14530420	T	12		0	6	T/-;TT/-;T/-;T/-;T/-;T/-
6	EAF1	3	15482997	T	22		0	6	TTT/-;TTTTTT/-;TTTTTTTT/-;TTT/-;TTTTT/-;TTTTTTT/-
6	TBC1D5	3	17201871	T	11		0	6	TT/-;T/-;TT/-;T/-;T/-;T/-
6	THRB	3	24160465	T	30		0	6	TTTTTTTTTTTT/-;TTTTT/-;TTTTTTTTT/-;TTTTTTTTTTTT/-;TTTTTTTTTTTT/-;TTTTTTTTTTTTTTT/-
6	RBMS3	3	30046425	A	11		0	6	AA/-;A/-;A/-;A/-;A/-;AA/-
6	GADL1	3	30769515	T	11		0	6	T/-;T/-;T/-;T/-;T/-;T/-
6	EPM2AIP1	3	37028921	A	16		4	2	-/AT;AA/-;AAAA/-;-/TATAT;-/T;-/T
6	GNAI2	3	50296331	A	12		0	6	AA/-;AA/-;A/-;AAA/-;AA/-;A/-
6	GNAI2	3	50296406	C	9		3	3	C/-;-/C;C/-;-/C;C/-;-/C
6	RBM15B	3	51431680	T	11		0	6	T/-;T/-;T/-;T/-;T/-;T/-
6	DUSP7	3	52084404	A	18		0	6	A/-;AAA/-;A/-;AA/-;A/-;A/-
6	FAM116A	3	57612437	A	13		1	5	A/-;A/-;A/-;-/A;A/-;A/-
6	RPP14	3	58304720	A	14		0	6	AAA/-;A/-;A/-;A/-;AAA/-;A/-
6	FAM107A	3	58551163	T	25		0	6	ATTTTTTTTTTT/-;ATTT/-;ATTT/-;ATTTTTTT/-;ATTTTTTTTT/-;TTTTTTTTTT/-
6	FOXP1	3	71005884	T	41	x	0	6	TTTTTTTTTTTTTTTTTTTTTT/-;TTTTTTTTTTTTT/-;TTTTTTTTTTTT/-;TTTTTTTTTTTTTTT/-;TTTTTTTTTTTTTTTTTTTTTT/-;TTTTTTTTTTTTTTTTTTT/-
6	FOXP1	3	71008342	T	13	x	0	6	TTTT/-;T/-;TT/-;T/-;T/-;TT/-
6	EIF4E3	3	71733545	A	15		0	6	AAAAA/-;A/-;A/-;AA/-;A/-;AAA/-
6	NFKBIZ	3	101579644	A	15		0	6	TTA/-;TAA/-;AA/-;TAAA/-;A/-;A/-
6	CD47	3	107763263	A	32		0	6	AAAAAAAAAAAAAAAAAAAAAAAAAC/-;AAAAAAAAAAAAAAAAAAAAAAAAAAAAAC/-;AAAAAAAAAAAAAAAAAAAAAAAAAC/-;AAAAAAAAAAAAAAAAAAAAAAAAAC/-;AAAAAAAAAAAAAAAAAAAAAAAAAAC/-;AAAAAAAAAAAAAAAAAAAAAAAAAC/-
6	MORC1	3	108677147	A	10		1	5	A/-;-/A;A/-;A/-;A/-;A/-
6	LSAMP	3	115521374	T	12		2	4	-/T;TT/-;T/-;-/TT;T/-;T/-
6	GSK3B	3	119544324	A	9		0	6	A/-;A/-;A/-;A/-;A/-;A/-
6	GTF2E1	3	120500563	T	16		0	6	T/-;T/-;TT/-;TT/-;TTT/-;TTTT/-
6	KPNA1	3	122141193	A	20		0	6	AAAAAAA/-;AA/-;AAAA/-;AAAAA/-;AAAAAA/-;AA/-
6	TRH	3	129696324	C	8		3	3	-/C;C/-;C/-;C/-;-/C;-/C
6	C3orf58	3	143709269	T	18		0	6	TT/-;TTT/-;T/-;TTTT/-;TTT/-;TTTT/-
6	GPR171	3	150916130	T	14		1	5	TTT/-;T/-;TTTT/-;TTT/-;-/G;T/-
6	SSR3	3	156259170	T	10		0	6	T/-;T/-;T/-;T/-;T/-;T/-
6	SHOX2	3	157814200	A	11		0	6	A/-;A/-;A/-;A/-;A/-;A/-
6	EIF5A2	3	170607963	A	11		0	6	A/-;A/-;A/-;A/-;A/-;A/-
6	EIF5A2	3	170610218	A	20		0	6	AAAAAA/-;AAAAAA/-;AAAAA/-;AAAAAAAAA/-;AA/-;AAAAAA/-
6	TTC14	3	180326183	T	15		0	6	TTTT/-;TT/-;T/-;TT/-;TTTT/-;T/-
6	TPRG1	3	189038936	T	20		0	6	TTTTTTTTTT/-;TTTTTTT/-;TTTTTTTT/-;TTT/-;TTTTT/-;TTTTTTT/-
6	SENP5	3	196660479	T	11		0	6	T/-;T/-;T/-;T/-;T/-;T/-
6	LMLN	3	197766472	A	13		0	6	A/-;A/-;AA/-;A/-;AA/-;A/-
6	MXD4	4	2251177	T	14		0	6	TTTTT/-;TTT/-;TTT/-;TTT/-;TTTT/-;TTT/-
6	WDR1	4	10076372	A	9		2	4	-/A;A/-;A/-;-/A;A/-;A/-
6	BOD1L	4	13571145	A	10		2	4	A/-;-/A;A/-;-/A;A/-;A/-
6	MED28	4	17625639	T	10		0	6	T/-;T/-;T/-;T/-;T/-;T/-
6	LCORL	4	17882782	T	11		0	6	T/-;TT/-;T/-;T/-;T/-;T/-
6	PCDH7	4	31144735	A	13		0	6	A/-;A/-;AAC/-;A/-;AAAC/-;AC/-
6	KLB	4	39450941	A	16		2	4	AAAA/-;AA/-;-/A;-/A;A/-;AA/-
6	LIMCH1	4	41701587	A	10		0	6	A/-;A/-;A/-;A/-;A/-;A/-
6	GABRA4	4	46923151	T	11		0	6	T/-;T/-;T/-;T/-;T/-;T/-
6	IGJ	4	71521660	A	16		0	6	AAAA/-;AA/-;AAA/-;A/-;A/-;AAAA/-
6	GRSF1	4	71686217	A	11		0	6	AA/-;A/-;A/-;A/-;A/-;A/-
6	FGF5	4	81210151	T	16		0	6	TTTTT/-;T/-;TT/-;T/-;TT/-;T/-
6	LIN54	4	83848302	A	18		0	6	AAAA/-;AA/-;A/-;A/-;AA/-;AAAAAA/-
6	BMPR1B	4	96077470	T	15		0	6	TTTTT/-;TT/-;TT/-;TTT/-;TT/-;TTT/-
6	TET2	4	106197996	C	11	x	1	5	CC/-;-/CCA;CC/-;C/-;C/-;C/-
6	TET2	4	106199563	A	10	x	0	6	A/-;A/-;A/-;A/-;A/-;A/-
6	PPA2	4	106290386	T	14		0	6	TT/-;T/-;TTT/-;T/-;T/-;TTT/-
6	GSTCD	4	106767826	T	20		0	6	TTTT/-;TTT/-;TTTTT/-;TTTTT/-;TTTTT/-;TTTTTT/-
6	NPNT	4	106890725	T	10		0	6	T/-;T/-;T/-;T/-;T/-;T/-
6	PLA2G12A	4	110632210	T	23		0	6	TTTTTT/-;TT/-;TTTTTTTTT/-;TTTT/-;TTTTT/-;TTTTTTTT/-
6	CAMK2D	4	114375412	T	11		0	6	T/-;TT/-;T/-;T/-;T/-;T/-
6	UGT8	4	115598018	A	12		1	5	A/-;A/-;-/A;A/-;A/-;A/-
6	TNIP3	4	122052757	T	22		0	6	TTTTTTTTT/-;TTTTTTTT/-;TTT/-;TTT/-;TTTTTTT/-;TTTTTTTTTT/-
6	TRPC3	4	122800387	A	18		0	6	AAAAAAAA/-;AAA/-;AA/-;A/-;AAAAA/-;A/-
6	PHF17	4	129796160	A	13		0	6	A/-;A/-;A/-;AAA/-;A/-;AA/-
6	NAA15	4	140310349	T	22		0	6	TTTTTT/-;TTT/-;TTTTT/-;TTTT/-;TT/-;TTT/-
6	TRIM2	4	154260106	T	12		3	3	TT/-;-/T;TT/-;-/T;-/T;TTT/-
6	NEIL3	4	178283943	T	10		0	6	T/-;T/-;T/-;T/-;T/-;T/-
6	FAM105A	5	14611815	T	10		0	6	T/-;T/-;T/-;T/-;T/-;TT/-
6	BASP1	5	17276743	A	19		1	5	A/-;AAA/-;A/-;AA/-;-/A;AA/-
6	PRLR	5	35058244	A	10		0	6	A/-;AA/-;A/-;A/-;A/-;A/-
6	ESM1	5	54274657	A	16		0	6	AA/-;AAA/-;AAAAA/-;AA/-;AAAA/-;AAA/-
6	C5orf43	5	60453909	A	9		1	5	-/A;A/-;A/-;A/-;A/-;A/-
6	UTP15	5	72876583	T	12		0	6	TT/-;TT/-;T/-;T/-;TT/-;T/-
6	ENC1	5	73923282	A	13		2	4	-/A;A/-;-/A;A/-;A/-;AAA/-
6	FAM169A	5	74075447	T	12		0	6	T/-;T/-;T/-;T/-;T/-;TT/-
6	SCAMP1	5	77772628	A	10		1	5	A/-;A/-;-/A;A/-;A/-;A/-
6	HOMER1	5	78671728	T	19		1	5	TTTTT/-;TTTTT/-;T/-;-/T;TTTTTT/-;TTTTT/-
6	KIAA0825	5	93489195	T	8		0	6	T/-;T/-;T/-;T/-;T/-;T/-
6	PCSK1	5	95727879	T	11		1	5	T/-;T/-;T/-;T/-;-/T;T/-
6	EFNA5	5	106716282	A	12		0	6	AA/-;A/-;A/-;AA/-;A/-;AA/-
6	SEMA6A	5	115781802	T	10		2	4	T/-;-/T;T/-;T/-;T/-;-/T
6	PPIC	5	122359468	A	12		0	6	AA/-;AA/-;A/-;AA/-;A/-;A/-
6	LYRM7	5	130537007	A	12		1	5	A/-;A/-;-/A;A/-;AA/-;A/-
6	SMAD5	5	135515015	A	10		0	6	A/-;A/-;A/-;A/-;A/-;A/-
6	EGR1	5	137804476	T	15		1	5	T/-;-/TTT;TT/-;TTT/-;TTTT/-;TTTTTCT/-
6	NR3C1	5	142657695	T	9		0	6	T/-;T/-;T/-;T/-;T/-;T/-
6	YIPF5	5	143538479	A	14		0	6	AA/-;A/-;AA/-;AA/-;A/-;AA/-
6	TCERG1	5	145890610	T	12		0	6	T/-;TT/-;T/-;T/-;T/-;TT/-
6	NMUR2	5	151771614	A	13		2	4	AA/-;-/AA;A/-;-/A;A/-;A/-
6	EBF1	5	158125672	T	15	x	0	6	TTTT/-;T/-;T/-;TT/-;T/-;TTT/-
6	UBLCP1	5	158712402	A	11		2	4	AC/-;-/A;-/A;A/-;A/-;A/-
6	UBTD2	5	171636661	T	14		0	6	TTA/-;TT/-;T/-;T/-;TTA/-;T/-
6	SFXN1	5	174954919	T	22		0	6	TTT/-;TTTT/-;T/-;TTT/-;TTTT/-;TTTT/-
6	ARL10	5	175800427	T	10		0	6	T/-;T/-;TT/-;T/-;T/-;T/-
6	SLC22A23	6	3271070	A	14		1	5	A/-;-/A;AA/-;A/-;A/-;A/-
6	E2F3	6	20492381	A	12		0	6	AA/-;A/-;AA/-;A/-;A/-;A/-
6	LRRC16A	6	25619962	T	28		0	6	TTTTTTTTTTTTT/-;TTTTTTTTTTGTA/-;TTTTTT/-;TTTTTTTTTTTTTT/-;TTTTTTTTTTTT/-;TTTTTT/-
6	BTN3A2	6	26376444	A	21		3	3	AAAAAAA/-;-/AG;AAA/-;-/G;-/AAAA;AAAAAAA/-
6	PPP1R10	6	30568235	A	11		1	5	AA/-;A/-;A/-;A/-;-/A;A/-
6	C6orf47	6	31626546	T	14		1	5	TTT/-;T/-;T/-;-/T;T/-;TT/-
6	SCUBE3	6	35216592	A	10		0	6	A/-;A/-;A/-;A/-;A/-;A/-
6	LHFPL5	6	35791636	T	11		1	5	T/-;T/-;T/-;T/-;T/-;-/T
6	PIM1	6	37143156	T	11	x	0	6	T/-;T/-;T/-;T/-;T/-;T/-
6	C6orf132	6	42070302	T	15		0	6	TTT/-;TTTT/-;T/-;TTT/-;T/-;TTT/-
6	MRPL2	6	43021911	A	10		1	5	A/-;A/-;A/-;-/AA;A/-;A/-
6	CLIC5	6	45868269	A	11		2	4	A/-;AA/-;-/AAAAAA;-/A;A/-;A/-
6	CENPQ	6	49459995	T	10		0	6	TT/-;T/-;T/-;T/-;T/-;T/-
6	COL19A1	6	70918738	T	12		0	6	TT/-;TT/-;TT/-;T/-;T/-;T/-
6	PM20D2	6	89874642	A	20		0	6	AA/-;AAAA/-;AA/-;AAA/-;AA/-;AA/-
6	PRDM1	6	106556967	A	22	x	1	5	AAAAAA/-;AAAA/-;AAAA/-;AA/-;AAAA/-;-/A
6	SLC35F1	6	118636597	T	24		0	6	TTTTTTTT/-;TTTTTTTT/-;TTTTTTTT/-;TTTT/-;TTTTTTTTT/-;TTTTTTTTT/-
6	NKAIN2	6	125146685	T	9		0	6	T/-;T/-;T/-;T/-;T/-;T/-
6	SGK1	6	134490614	A	11		1	5	AA/-;-/A;A/-;A/-;A/-;A/-
6	PDE7B	6	136516594	A	22		0	6	AAAAAAAAA/-;AAAA/-;AA/-;AAA/-;AA/-;AAAAAA/-
6	BCLAF1	6	136581675	T	11		1	5	T/-;T/-;-/T;T/-;T/-;T/-
6	KIAA1244	6	138664595	T	9		3	3	-/T;-/TG;-/T;T/-;T/-;TG/-
6	PHACTR2	6	144151418	T	18		0	6	TTTTT/-;TTTTT/-;TTT/-;TT/-;T/-;TT/-
6	PLAGL1	6	144261867	T	14		2	4	TTTT/-;T/-;-/T;TT/-;-/T;TT/-
6	SASH1	6	148870202	A	17		1	5	AAAAAA/-;A/-;AAA/-;A/-;A/-;-/A
6	ESR1	6	152422170	T	17		1	5	TTT/-;TTT/-;TTT/-;TTT/-;-/T;TTTTT/-
6	MYCT1	6	153045369	T	18		0	6	TTT/-;TTTT/-;TT/-;T/-;T/-;TTTT/-
6	TFB1M,TIAM2	6	155578325	A	21		1	5	-/AA;AA/-;AA/-;AAAA/-;AAA/-;AAAAA/-
6	ARID1B	6	157529850	T	18		0	6	TT/-;TTT/-;TTTTT/-;TT/-;T/-;TTT/-
6	GTF2H5	6	158615021	A	21		0	6	AAAAAAA/-;AAAAAA/-;AAAA/-;AAAAA/-;AAA/-;AAAAA/-
6	QKI	6	163991927	T	17		0	6	TT/-;TT/-;T/-;TT/-;TT/-;TT/-
6	CCR6	6	167552417	A	21		0	6	AA/-;AAAA/-;AAAA/-;A/-;AA/-;A/-
6	PDGFA	7	536909	T	11		0	6	T/-;T/-;T/-;T/-;T/-;T/-
6	WIPI2	7	5270696	A	13		1	5	A/-;AAA/-;-/AA;AA/-;A/-;AA/-
6	WIPI2	7	5271381	T	15		0	6	T/-;T/-;T/-;T/-;T/-;T/-
6	TNRC18	7	5346509	A	11		2	4	A/-;-/A;-/A;A/-;A/-;AC/-
6	AHR	7	17384937	A	14		0	6	A/-;A/-;A/-;A/-;A/-;AAA/-
6	SKAP2	7	26708282	T	19		1	5	TTTTTT/-;TTT/-;TT/-;-/T;TTTTTT/-;T/-
6	ZNF716	7	57529812	A	10		0	6	A/-;A/-;A/-;A/-;A/-;A/-
6	ZNF716	7	57531121	A	15		0	6	AAAA/-;AAA/-;AAA/-;AAAAA/-;AA/-;AAA/-
6	AUTS2	7	70257474	A	20		0	6	AA/-;A/-;AA/-;AA/-;AA/-;AAAA/-
6	AUTS2	7	70257602	T	15		0	6	TT/-;TT/-;TT/-;T/-;T/-;TT/-
6	CYP51A1	7	91742143	A	19		0	6	AAAA/-;AA/-;AAA/-;AAAAA/-;AA/-;A/-
6	GATAD1	7	92088539	A	16		0	6	AAAAAA/-;AAAA/-;A/-;A/-;A/-;A/-
6	LMTK2	7	97836817	T	16		0	6	T/-;TT/-;T/-;T/-;TT/-;TT/-
6	GAL3ST4	7	99757343	A	13		0	6	A/-;A/-;A/-;AA/-;A/-;A/-
6	CDHR3	7	105675529	A	16		0	6	AAAA/-;AA/-;AAA/-;A/-;A/-;AAA/-
6	SLC26A4	7	107357811	A	25		0	6	AAAAA/-;AAAAA/-;AAAAAAAAA/-;AAAAA/-;AAAAAA/-;AAAAAAAAAA/-
6	LRRN3	7	110764989	A	13		2	4	AAA/-;-/A;AA/-;-/A;AAA/-;AA/-
6	NAA38	7	117832210	A	9		6	0	-/AA;-/AA;-/A;-/A;-/A;-/AAA
6	SLC13A1	7	122754138	A	24		0	6	AAAAAAAA/-;AAAAAA/-;AAAAA/-;AAAAAA/-;AAAAAAAA/-;AAAA/-
6	ARF5	7	127231636	T	10		0	6	T/-;T/-;T/-;TT/-;TT/-;TT/-
6	FAM40B	7	129126838	T	34		0	6	TTTTTTTTTTTTTTTTTTT/-;TTTTTTTTTTTTT/-;TTTTTTTTTTTTTTT/-;TTTTTTTTTTTTT/-;TTTTTTTTTTTTT/-;TTTTTTTTTTTTTT/-
6	CPA4	7	129963064	T	13		3	3	T/-;-/T;-/T;T/-;-/T;T/-
6	PLXNA4	7	131810166	T	11		0	6	T/-;T/-;T/-;T/-;T/-;T/-
6	SLC35B4	7	133977009	T	10		0	6	T/-;T/-;T/-;T/-;TT/-;T/-
6	CREB3L2	7	137559831	T	14	x	1	5	TT/-;TT/-;TT/-;-/TTT;TT/-;T/-
6	UBN2	7	138989575	T	10		1	5	TT/-;-/T;T/-;T/-;T/-;T/-
6	XRCC2	7	152345499	A	15		0	6	A/-;AAA/-;AAAA/-;A/-;AAA/-;A/-
6	DLGAP2	8	1651466	A	13		1	5	A/-;A/-;A/-;AAA/-;-/A;AA/-
6	SGK223	8	8175298	T	12		0	6	T/-;T/-;T/-;T/-;T/-;TTT/-
6	MTMR9	8	11185355	A	10		0	6	A/-;A/-;A/-;A/-;A/-;AA/-
6	C8orf48	8	13425581	T	9		0	6	T/-;T/-;T/-;T/-;T/-;T/-
6	PCM1	8	17886666	A	26	x	0	6	AAAAAA/-;AAA/-;AAAAAAA/-;AAAAAAAA/-;AAAAAAAAAAAA/-;AAAAAAAA/-
6	LPL	8	19823635	A	11		0	6	A/-;A/-;A/-;A/-;A/-;A/-
6	KIAA1967	8	22477931	T	18		0	6	TTTTT/-;TT/-;TT/-;TTT/-;TTTTT/-;GTTTT/-
6	ENTPD4	8	23289681	A	11		0	6	A/-;A/-;A/-;A/-;A/-;A/-
6	NKX3-1	8	23537639	A	27		0	6	GAAAAAAAAAA/-;AAAAAAAA/-;AAAAAAAAAAAA/-;AAAAAAAA/-;AAAAAAAA/-;AAAAAAAAAAAA/-
6	RNF122	8	33405499	A	26		0	6	AAAAA/-;AAA/-;AAAAAA/-;AAAA/-;AAA/-;AAAAAAAAA/-
6	PROSC	8	37636577	A	10		0	6	A/-;A/-;A/-;A/-;A/-;AA/-
6	TACC1	8	38708294	A	25		0	6	AAAA/-;AAAAA/-;AAAAA/-;AAA/-;AAAAA/-;AAAAA/-
6	KAT6A	8	41788247	T	26		0	6	TTTTTTTTTTTTT/-;TTTTTTTTTTTT/-;TTTTTTTT/-;TATAT/-;TTTTTTT/-;TTTTTTTTTTTTTT/-
6	MCM4	8	48889824	A	22		0	6	AAA/-;AAAAA/-;AAAAA/-;AAAAAAA/-;AAAAAAA/-;AAAAAAC/-
6	LYN	8	56923132	A	15		0	6	AA/-;A/-;AA/-;A/-;AA/-;AAA/-
6	SDR16C5	8	57212735	T	12		0	6	T/-;T/-;T/-;TT/-;TT/-;T/-
6	CHD7	8	61778759	T	11		0	6	T/-;T/-;T/-;T/-;T/-;T/-
6	ZC2HC1A	8	79631106	T	10		2	4	T/-;T/-;T/-;-/T;T/-;-/T
6	RBM12B	8	94744119	T	11		0	6	T/-;T/-;TT/-;T/-;T/-;T/-
6	RBM12B	8	94745438	A	11		1	5	-/A;AA/-;A/-;A/-;A/-;A/-
6	TP53INP1	8	95938648	A	14		0	6	AAAA/-;A/-;A/-;A/-;A/-;A/-
6	RIMS2	8	105264756	A	14		1	5	AA/-;AA/-;A/-;-/A;A/-;AA/-
6	OXR1	8	107764240	A	10		3	3	-/AA;-/A;A/-;A/-;-/A;A/-
6	SAMD12	8	119208741	A	13		0	6	AA/-;A/-;A/-;AAA/-;A/-;A/-
6	MAL2	8	120256101	A	8		0	6	A/-;A/-;A/-;A/-;AA/-;A/-
6	EPPK1	8	144940070	A	11		0	6	AAAAAAAAC/-;AAAAC/-;AC/-;AAC/-;AAAAAAC/-;AAAAAAAAAAC/-
6	GLIS3	9	3824895	T	12		0	6	TTT/-;T/-;TT/-;T/-;TT/-;TT/-
6	PSIP1	9	15470933	A	24		0	6	AAAAAAAAAAAA/-;AAAAA/-;AAAAA/-;AAAAAAAA/-;AAAAAAA/-;AA/-
6	TOPORS	9	32541246	A	10		0	6	A/-;A/-;A/-;A/-;A/-;A/-
6	SMU1	9	33046891	A	15		0	6	AAAA/-;AA/-;A/-;A/-;A/-;A/-
6	SMU1	9	33047211	A	14		1	5	AAA/-;-/AA;AA/-;A/-;A/-;A/-
6	BAG1	9	33254143	T	20		0	6	TTTT/-;TTTT/-;TTT/-;T/-;TTTT/-;TTTTT/-
6	UBAP2	9	33921844	T	13		0	6	TTT/-;T/-;T/-;T/-;T/-;TT/-
6	GLIPR2	9	36162777	T	12		2	4	T/-;-/T;T/-;-/T;T/-;TT/-
6	DCAF10	9	37865074	T	12		0	6	TT/-;T/-;T/-;T/-;T/-;T/-
6	FAM122A	9	71396663	T	11		0	6	T/-;T/-;T/-;T/-;T/-;T/-
6	GCNT1	9	79119830	T	11		2	4	T/-;-/T;-/T;T/-;T/-;T/-
6	HNRNPK	9	86583801	A	10		0	6	AA/-;A/-;A/-;A/-;A/-;AA/-
6	ATP6V1G1	9	117360336	A	14		1	5	AA/-;AA/-;A/-;A/-;AA/-;-/A
6	PSMD5	9	123578377	A	10		1	5	A/-;A/-;-/A;A/-;A/-;A/-
6	GSN	9	124095004	T	14		0	6	T/-;TTTT/-;T/-;T/-;T/-;TTT/-
6	PPP6C	9	127911822	A	11		0	6	A/-;A/-;A/-;A/-;A/-;A/-
6	GOLGA2	9	131018794	T	14		0	6	T/-;TT/-;TTT/-;TT/-;T/-;T/-
6	LRRC8A	9	131679310	T	13		2	4	TT/-;-/T;T/-;T/-;-/T;TT/-
6	MCM10	10	13252314	A	16		0	6	AAA/-;AAA/-;A/-;AAA/-;A/-;AA/-
6	OLAH	10	15115659	A	20		0	6	AAA/-;AAAAAA/-;AAAAA/-;AA/-;AAAAAA/-;AA/-
6	NSUN6	10	18834646	A	12		0	6	A/-;AA/-;AA/-;AT/-;A/-;A/-
6	C10orf140	10	21803143	A	23		2	4	AAAAAAA/-;AAAG/-;-/A;AG/-;-/A;AAAAAAA/-
6	ARHGAP12	10	32096466	A	9		1	5	A/-;A/-;A/-;A/-;A/-;-/A
6	ARID5B	10	63853411	T	27		0	6	TTTTTTTTTTT/-;TTTTTTTTTTA/-;TTTTTT/-;TTTTT/-;TTTTTTTT/-;TTTTTTTTTTT/-
6	EIF4EBP2	10	72188038	A	11		1	5	-/A;A/-;A/-;A/-;A/-;A/-
6	KIAA1274	10	72327754	A	12		0	6	A/-;A/-;A/-;A/-;A/-;A/-
6	EIF5AL1	10	81273170	T	14		0	6	TT/-;T/-;TT/-;TT/-;TT/-;TT/-
6	ANXA11	10	81915056	T	9		0	6	T/-;T/-;TTT/-;T/-;T/-;T/-
6	PAPSS2	10	89506163	A	11		0	6	A/-;AA/-;A/-;AAA/-;A/-;A/-
6	SFXN2	10	104498057	T	14		0	6	TT/-;TTT/-;TT/-;T/-;TTT/-;TT/-
6	CYP17A1	10	104590294	A	11		0	6	A/-;A/-;A/-;A/-;AA/-;A/-
6	SORCS1	10	108333807	T	13		1	5	TT/-;T/-;-/T;T/-;TT/-;T/-
6	GFRA1	10	117820758	A	15		1	5	A/-;A/-;A/-;-/A;A/-;AAA/-
6	RAB11FIP2	10	119765267	T	11		1	5	T/-;T/-;T/-;T/-;-/T;T/-
6	C11orf58	11	16778456	A	20		4	2	AAA/-;-/AAAAAA;-/AAA;AAA/-;-/AAAAAAAA;-/AA
6	PRR5L	11	36485195	A	11		0	6	A/-;A/-;A/-;A/-;A/-;A/-
6	OSBP	11	59341901	T	12		1	5	T/-;T/-;T/-;-/T;T/-;T/-
6	FADS1	11	61569355	T	16		0	6	TTTTTT/-;T/-;T/-;TT/-;TT/-;TT/-
6	FKBP2	11	64011555	A	10		2	4	-/A;AA/-;A/-;-/A;A/-;A/-
6	SUV420H1	11	67924560	T	16		0	6	ATTTTT/-;ATT/-;T/-;TTT/-;TT/-;ATTT/-
6	CCND1	11	69466274	A	10	x	0	6	A/-;A/-;A/-;A/-;A/-;A/-
6	PGM2L1	11	74047321	T	11		0	6	T/-;T/-;T/-;T/-;T/-;T/-
6	MAP6	11	75316788	A	11		1	5	A/-;A/-;-/A;A/-;A/-;A/-
6	ODZ4	11	78367063	T	9		1	5	TT/-;-/T;T/-;T/-;T/-;T/-
6	FZD4	11	86660449	A	13		0	6	A/-;AG/-;A/-;A/-;AAA/-;AG/-
6	FAT3	11	92626325	A	11		0	6	A/-;A/-;A/-;A/-;A/-;A/-
6	GPR83	11	94112537	A	17		2	4	AA/-;A/-;A/-;-/A;-/A;AAA/-
6	DCUN1D5	11	102928281	A	11		1	5	A/-;A/-;-/A;A/-;A/-;AA/-
6	CUL5	11	107975796	T	13		0	6	TT/-;T/-;T/-;T/-;T/-;T/-
6	ZBTB16	11	114121372	A	11		1	5	A/-;A/-;-/A;A/-;A/-;A/-
6	TAGLN	11	117075477	A	18		0	6	AAAAAA/-;AA/-;AAAA/-;A/-;A/-;AAA/-
6	DDX6	11	118622142	A	10	x	0	6	A/-;A/-;A/-;A/-;A/-;A/-
6	UBASH3B	11	122681009	T	13		0	6	TT/-;TT/-;TT/-;T/-;T/-;TTT/-
6	ZBTB44	11	130100471	A	12		1	5	A/-;A/-;A/-;-/A;A/-;AAA/-
6	ZBTB44	11	130102911	A	11		0	6	A/-;A/-;A/-;A/-;A/-;A/-
6	NTM	11	132206283	A	15		0	6	AAAAA/-;AAAAA/-;AA/-;AA/-;AA/-;AAAAA/-
6	NTM	11	132206566	T	12		0	6	TT/-;T/-;TT/-;TTT/-;TT/-;TT/-
6	KDM5A	12	393490	T	12	x	0	6	T/-;T/-;TT/-;T/-;T/-;T/-
6	KDM5A	12	393805	T	11	x	0	6	T/-;T/-;T/-;T/-;T/-;T/-
6	TULP3	12	3049488	A	17		0	6	AA/-;AAAA/-;AA/-;A/-;AAA/-;AA/-
6	CCND2	12	4409521	T	10	x	0	6	T/-;T/-;T/-;T/-;T/-;T/-
6	CCND2	12	4411111	T	12	x	0	6	TT/-;T/-;T/-;TT/-;T/-;TT/-
6	NCAPD2	12	6640670	T	8		0	6	TTA/-;T/-;TT/-;T/-;T/-;T/-
6	COPS7A	12	6840954	A	11		0	6	AA/-;A/-;A/-;A/-;A/-;A/-
6	AICDA	12	8755426	T	16		1	5	TTTTT/-;T/-;TCTCTTT/-;-/C;T/-;T/-
6	RIMKLB	12	8927169	T	16		0	6	TT/-;T/-;T/-;TTTT/-;TTT/-;TTTTT/-
6	C12orf59	12	10343823	T	14		0	6	TT/-;TT/-;TT/-;T/-;TT/-;T/-
6	FGFR1OP2	12	27118563	T	10		0	6	TT/-;T/-;T/-;T/-;T/-;T/-
6	ERGIC2	12	29493586	T	12		0	6	TT/-;T/-;T/-;T/-;TT/-;T/-
6	FGD4	12	32798228	T	12		0	6	T/-;T/-;T/-;TT/-;TT/-;T/-
6	PKP2	12	32944047	A	11		0	6	A/-;A/-;A/-;A/-;A/-;A/-
6	ARID2	12	46299724	T	11	x	0	6	TC/-;T/-;T/-;T/-;T/-;TC/-
6	KCNH3	12	49952060	A	12		0	6	A/-;AA/-;A/-;A/-;A/-;A/-
6	FMNL3	12	50038888	A	25		0	6	AAAAAAAAAAAA/-;AAAA/-;AAA/-;AAAAAA/-;AAAAAAA/-;AAAAA/-
6	TMBIM6	12	50158494	A	12		1	5	AAA/-;A/-;-/AAAG;A/-;AAA/-;AAAAG/-
6	ERBB3	12	56496753	A	12		0	6	A/-;A/-;A/-;AA/-;A/-;A/-
6	RNF41	12	56599354	G	10		0	6	G/-;G/-;G/-;G/-;G/-;G/-
6	STAT2	12	56736373	A	13		0	6	A/-;A/-;A/-;AA/-;A/-;A/-
6	SRGAP1	12	64537561	A	14		0	6	AAAA/-;A/-;AA/-;AAAA/-;AA/-;A/-
6	WIF1	12	65444596	T	13	x	1	5	TT/-;TTT/-;T/-;T/-;T/-;-/T
6	DYRK2	12	68054142	A	11		0	6	A/-;A/-;A/-;A/-;A/-;A/-
6	THAP2	12	72073230	T	10		1	5	T/-;TT/-;T/-;T/-;T/-;-/T
6	TBC1D15	12	72318795	A	19		0	6	AAAAAAAA/-;AAAA/-;AAA/-;AAAAA/-;AAAAA/-;AAAAAA/-
6	CCDC41	12	94702283	A	11		3	3	-/A;AA/-;A/-;-/A;A/-;-/A
6	TMCC3	12	94962035	T	18		0	6	TTTTTTTT/-;TTT/-;TTT/-;TT/-;TTT/-;TTTTTT/-
6	ARL1	12	101787093	T	11		0	6	T/-;T/-;T/-;T/-;T/-;T/-
6	C12orf23	12	107366639	T	19		0	6	TTTT/-;TTTTT/-;TTTT/-;TTT/-;TT/-;TTTTTTTT/-
6	BTBD11	12	108052116	T	12		0	6	T/-;T/-;T/-;T/-;T/-;T/-
6	TMEM119	12	108984473	A	11		0	6	A/-;A/-;A/-;A/-;A/-;A/-
6	ATP2A2	12	110786507	A	9		0	6	A/-;A/-;A/-;A/-;A/-;A/-
6	SH2B3	12	111887736	T	14	x	1	5	T/-;TT/-;T/-;-/T;T/-;T/-
6	ATXN2	12	111890234	T	21		0	6	TTTTTTTTT/-;TTTTTT/-;TTTTTT/-;TTTTTT/-;TTTTTT/-;TTTTTTTTT/-
6	FBXO21	12	117582900	T	11		0	6	TT/-;T/-;T/-;T/-;T/-;T/-
6	MSI1	12	120779456	A	14		2	4	AA/-;-/A;-/A;A/-;A/-;A/-
6	CAMKK2	12	121678328	T	13		0	6	TTT/-;TT/-;TT/-;T/-;T/-;T/-
6	RIMBP2	12	130882590	A	11		1	5	A/-;A/-;-/A;A/-;A/-;A/-
6	GPR12	13	27330333	T	10		0	6	T/-;T/-;T/-;T/-;T/-;T/-
6	LHFP	13	39917692	A	12	x	1	5	A/-;A/-;A/-;-/A;A/-;AA/-
6	TNFSF11	13	43181996	T	6		1	5	TTG/-;TG/-;TTG/-;TTG/-;TG/-;-/T
6	HTR2A	13	47408903	T	11		1	5	T/-;T/-;-/T;T/-;T/-;T/-
6	HS6ST3	13	97490098	A	13		1	5	AAA/-;-/A;A/-;A/-;A/-;A/-
6	ARGLU1	13	107196174	A	17		0	6	AAAAAA/-;AAAAG/-;AAAAA/-;AAA/-;A/-;AAAAAAA/-
6	SOX1	13	112725172	C	9		1	5	C/-;-/C;C/-;C/-;C/-;C/-
6	MDGA2	14	47310831	T	15		0	6	TTTTT/-;TTTT/-;TTTT/-;TTT/-;TTTT/-;TT/-
6	ARF6	14	50361172	T	22		0	6	TTTTT/-;TTTTTTT/-;TTT/-;TTTTTTTTT/-;TTTTTTTT/-;TTTTTTTT/-
6	PTGDR	14	52741993	T	12		0	6	TT/-;T/-;T/-;T/-;T/-;T/-
6	SOCS4	14	55512748	T	10		0	6	T/-;T/-;T/-;T/-;T/-;T/-
6	PELI2	14	56764822	T	11		0	6	T/-;T/-;T/-;TT/-;T/-;T/-
6	ARID4A	14	58840120	T	10		0	6	TT/-;T/-;T/-;T/-;TT/-;TT/-
6	DCAF5	14	69520519	T	13		0	6	TT/-;T/-;TT/-;TT/-;TTT/-;T/-
6	ERH	14	69847046	A	13		0	6	A/-;A/-;A/-;A/-;A/-;AA/-
6	COX16,SYNJ2BP-COX16	14	70793016	A	14		0	6	A/-;AA/-;A/-;AAA/-;A/-;A/-
6	SYNJ2BP	14	70834869	A	10		0	6	A/-;A/-;A/-;A/-;A/-;A/-
6	RGS6	14	73030607	A	11		0	6	A/-;A/-;A/-;A/-;A/-;A/-
6	RPS6KA5	14	91337833	T	15		1	5	TT/-;T/-;TTT/-;-/T;T/-;TTT/-
6	ATXN3	14	92527079	T	16		0	6	TT/-;T/-;TT/-;TTT/-;TTT/-;T/-
6	BTBD7	14	93705797	T	13		0	6	TT/-;T/-;T/-;TT/-;T/-;TT/-
6	BTBD7	14	93708433	A	12		0	6	A/-;A/-;A/-;A/-;A/-;AAA/-
6	OTUB2	14	94512842	A	11		0	6	A/-;A/-;A/-;AA/-;A/-;A/-
6	YY1	14	100744471	A	12		0	6	AA/-;AA/-;A/-;AA/-;AA/-;A/-
6	MEIS2	15	37183447	T	10		0	6	T/-;T/-;T/-;T/-;T/-;T/-
6	SNAP23	15	42824293	T	14		0	6	TT/-;TT/-;T/-;TT/-;T/-;T/-
6	HAUS2	15	42861496	T	19		0	6	TTTTT/-;TT/-;T/-;TTT/-;TT/-;TTTTTTT/-
6	ZSCAN29	15	43652835	A	14		0	6	AA/-;AAA/-;A/-;A/-;A/-;A/-
6	WDR76	15	44158821	T	21		0	6	TTTTTT/-;TTTT/-;TTTTTT/-;TTT/-;T/-;TT/-
6	ATP8B4	15	50152132	A	14		0	6	AA/-;A/-;A/-;AA/-;AA/-;A/-
6	RORA	15	60785853	T	11		2	4	T/-;-/T;T/-;-/T;T/-;T/-
6	CSNK1G1	15	64461433	T	12		1	5	T/-;T/-;T/-;TT/-;-/TT;TT/-
6	DPP8	15	65738416	A	11		0	6	A/-;A/-;A/-;A/-;A/-;A/-
6	TLE3	15	70341342	A	15		0	6	AA/-;AA/-;AAA/-;A/-;AA/-;AAA/-
6	HEXA	15	72636198	T	10		0	6	TT/-;T/-;T/-;T/-;T/-;T/-
6	CIB2	15	78397250	T	12		0	6	TT/-;T/-;T/-;TT/-;T/-;TT/-
6	CHRNA3	15	78888783	T	11		0	6	T/-;T/-;T/-;T/-;T/-;T/-
6	AP3S2,C15orf38-AP3S2	15	90378132	A	12		2	4	AA/-;A/-;-/A;AA/-;-/A;A/-
6	NR2F2	15	96881217	T	10		1	5	TT/-;T/-;T/-;-/T;T/-;T/-
6	NR2F2	15	96883087	G	11		0	6	GG/-;G/-;G/-;GG/-;G/-;GG/-
6	UNKL	16	1414996	T	17		1	5	TTTTT/-;TT/-;T/-;T/-;-/T;TTTT/-
6	ABAT	16	8878317	A	10		0	6	A/-;A/-;A/-;A/-;A/-;A/-
6	C16orf72	16	9211118	T	13		0	6	TTT/-;TT/-;TT/-;T/-;TT/-;T/-
6	GRIN2A	16	9851216	T	15		1	5	T/-;TT/-;TA/-;-/T;T/-;TT/-
6	ITPRIPL2	16	19130799	T	12		0	6	T/-;T/-;T/-;T/-;T/-;T/-
6	CCP110	16	19563849	A	20		0	6	AAAAAA/-;AAAAA/-;AA/-;AAAA/-;AAAAAA/-;AAAAA/-
6	EEF2K	16	22295932	T	13		0	6	T/-;T/-;TTT/-;T/-;T/-;T/-
6	USP31	16	23076644	A	17		0	6	AAAA/-;A/-;A/-;A/-;A/-;A/-
6	MAZ	16	29821984	T	14		0	6	TTT/-;TTTT/-;T/-;T/-;TT/-;TTT/-
6	STX1B	16	31000675	G	8		2	4	G/-;G/-;G/-;-/G;-/G;G/-
6	SHCBP1	16	46614659	T	14		0	6	TT/-;TT/-;T/-;TTTT/-;T/-;TT/-
6	VPS35	16	46693622	A	11		2	4	A/-;A/-;-/A;-/AA;A/-;A/-
6	C16orf87	16	46836143	T	12		0	6	TT/-;TT/-;T/-;T/-;T/-;T/-
6	PAPD5	16	50264180	T	10		0	6	TT/-;T/-;T/-;T/-;T/-;T/-
6	OGFOD1	16	56510334	T	12		0	6	T/-;T/-;T/-;T/-;T/-;T/-
6	DYNC1LI2	16	66755236	T	11		0	6	T/-;TT/-;T/-;T/-;T/-;T/-
6	RANBP10	16	67757025	T	10		0	6	T/-;T/-;T/-;T/-;T/-;T/-
6	ZFHX3	16	72820939	T	17		1	5	TTT/-;T/-;-/T;TTT/-;TTTTTT/-;TTTT/-
6	WDR59	16	74907485	T	14		0	6	TT/-;TTT/-;T/-;TT/-;TTTTT/-;T/-
6	CLEC3A	16	78065331	T	12		0	6	TT/-;T/-;TT/-;T/-;T/-;T/-
6	GAN	16	81413522	T	12		0	6	T/-;T/-;T/-;T/-;T/-;TT/-
6	CMIP	16	81744145	A	11		0	6	A/-;A/-;A/-;A/-;A/-;A/-
6	CMIP	16	81744988	A	10		1	5	A/-;A/-;A/-;-/A;A/-;A/-
6	CDH13	16	83828684	A	11		0	6	A/-;AA/-;A/-;A/-;A/-;A/-
6	HSDL1	16	84155969	T	13		2	4	TTTT/-;T/-;T/-;T/-;-/T;-/T
6	KIAA0182	16	85707085	A	16		0	6	AA/-;AA/-;A/-;AAA/-;AAAAA/-;AA/-
6	SCARF1	17	1537683	A	17		0	6	AAAA/-;AA/-;AAA/-;AA/-;A/-;A/-
6	TLCD2	17	1606350	T	13		0	6	TTT/-;T/-;T/-;T/-;TTT/-;T/-
6	MNT	17	2287534	T	13		0	6	T/-;TT/-;T/-;TT/-;T/-;TTTT/-
6	UBE2G1	17	4173434	A	10		0	6	A/-;A/-;A/-;A/-;A/-;A/-
6	PFN1	17	4848973	A	10		0	6	A/-;A/-;A/-;A/-;A/-;A/-
6	AIPL1	17	6328628	T	17		0	6	TTTTTT/-;T/-;T/-;TT/-;TTT/-;T/-
6	ZNF287	17	16454420	T	9		1	5	-/T;T/-;T/-;T/-;T/-;T/-
6	FLCN	17	17115790	A	26		0	6	AAAAAAA/-;AAAAAAA/-;AAAAAA/-;AAAAAAAAA/-;AAAAAAAAAAA/-;AAAAAAAAAA/-
6	SRCIN1	17	36689331	A	17		1	5	AAAC/-;-/AAA;A/-;AA/-;A/-;A/-
6	STARD3	17	37819723	A	15		1	5	A/-;-/A;A/-;AA/-;AAA/-;A/-
6	PLEKHH3	17	40819950	T	15		0	6	TT/-;TT/-;TTT/-;TTT/-;TT/-;T/-
6	RND2	17	41181922	A	24		0	6	AAAAAA/-;AAAAG/-;AAAAA/-;AAAG/-;AAAAA/-;AAAAAAAA/-
6	UBTF	17	42284469	T	15		0	6	T/-;TTT/-;TT/-;TTT/-;T/-;T/-
6	HEXIM1	17	43228674	A	11		0	6	A/-;A/-;A/-;A/-;A/-;A/-
6	HOXB3	17	46627001	A	9		2	4	A/-;-/A;A/-;A/-;A/-;-/A
6	CHAD	17	48542131	G	10		1	5	-/GG;G/-;G/-;G/-;G/-;GG/-
6	ANKRD40	17	48770712	A	10		0	6	A/-;A/-;A/-;A/-;A/-;A/-
6	AKAP1	17	55198579	A	14		0	6	A/-;A/-;A/-;A/-;A/-;A/-
6	TUBD1	17	57937374	T	21		0	6	TTTTTTTT/-;TTTTTT/-;TTTTTTT/-;TTTTTT/-;TTTTTTTTT/-;TTTTTT/-
6	DDX5	17	62495665	A	10	x	0	6	AA/-;A/-;A/-;A/-;A/-;A/-
6	SMURF2	17	62541852	G	13		0	6	AAAAGGGG/-;AAAAAGGG/-;AAAGGG/-;AAAAGGGG/-;AAAAGGG/-;AAAAAAAGGGG/-
6	KCNJ2	17	68175206	T	34		0	6	TTTTTTTTTTTTTTTTTTTT/-;TTTTT/-;TTTTTTTTTTTT/-;TTTTTTTT/-;TTTTTTTTT/-;TTTTTTTTTTTTTTTT/-
6	CDR2L	17	73000523	T	15		0	6	TTTT/-;TT/-;TTT/-;TT/-;TTTTT/-;TTT/-
6	ACOX1	17	73941870	A	10		2	4	A/-;-/A;A/-;A/-;-/A;AA/-
6	ST6GALNAC2	17	74561656	A	13		0	6	AA/-;AA/-;A/-;AA/-;A/-;A/-
6	TNRC6C	17	76102966	A	16		0	6	AAAAAA/-;AAA/-;AA/-;AAA/-;A/-;AA/-
6	BAIAP2	17	79083173	A	23		1	5	-/AAAA;AAAAA/-;AAAAAA/-;AAAG/-;AAAAA/-;AAAA/-
6	NPLOC4	17	79525611	A	9		2	4	A/-;A/-;-/A;-/A;A/-;A/-
6	MAFG	17	79879436	T	12		2	4	T/-;T/-;T/-;-/T;T/-;-/T
6	USP14	18	213519	A	12		0	6	A/-;A/-;A/-;A/-;AA/-;AAAA/-
6	ARHGAP28	18	6914975	A	10		1	5	AA/-;A/-;A/-;-/A;A/-;A/-
6	NAPG	18	10551002	T	11		0	6	T/-;T/-;T/-;T/-;T/-;TT/-
6	TMEM241	18	20877523	A	12		0	6	AA/-;A/-;A/-;A/-;AA/-;AA/-
6	KCTD1	18	24035449	T	12		1	5	TTT/-;TT/-;TT/-;T/-;-/T;TT/-
6	ZNF397	18	32826672	A	16		0	6	AA/-;A/-;A/-;AAA/-;AA/-;AA/-
6	C18orf25	18	43844699	T	16		2	4	TTT/-;TT/-;-/T;T/-;-/T;TTTTTT/-
6	SKA1	18	47918723	T	14		0	6	TTT/-;T/-;T/-;TTT/-;TT/-;TT/-
6	C18orf54	18	51905870	T	18		0	6	TTT/-;TTTTTT/-;TT/-;TT/-;TTTTTTT/-;TTTT/-
6	TCF4	18	52889713	A	13		0	6	A/-;A/-;A/-;A/-;A/-;A/-
6	TCF4	18	52893505	T	11		0	6	T/-;T/-;TT/-;T/-;T/-;T/-
6	ZNF532	18	56653000	T	18		2	4	TT/-;TTTTT/-;TT/-;-/T;-/T;T/-
6	TNFRSF11A	18	60052577	G	11		0	6	GG/-;GG/-;G/-;G/-;G/-;G/-
6	CCDC102B	18	66722369	A	9		0	6	A/-;A/-;A/-;A/-;A/-;A/-
6	TCF3	19	1610924	G	14	x	0	6	GGGG/-;GGG/-;GGG/-;GGGG/-;GGGG/-;GGG/-
6	TCF3	19	1611373	A	12	x	0	6	AA/-;AA/-;AAA/-;AA/-;A/-;AA/-
6	MOB3A	19	2072746	A	13		0	6	AAA/-;A/-;A/-;A/-;AA/-;AAA/-
6	LMNB2	19	2428237	A	10		0	6	A/-;A/-;A/-;A/-;A/-;A/-
6	CELF5	19	3297015	A	21		0	6	AAAAAAA/-;AGA/-;AAAA/-;AAA/-;AAAAAA/-;AAAAAAA/-
6	ZBTB7A	19	4046341	T	11		0	6	T/-;TT/-;T/-;T/-;TT/-;TT/-
6	SAFB	19	5668445	T	12		0	6	TT/-;T/-;TTT/-;T/-;T/-;T/-
6	KHSRP	19	6413218	A	13		0	6	A/-;A/-;A/-;A/-;A/-;AA/-
6	KHSRP	19	6413652	T	10		0	6	T/-;T/-;TT/-;T/-;T/-;T/-
6	INSR	19	7112348	A	9		1	5	AA/-;A/-;A/-;-/A;A/-;A/-
6	INSR	19	7114059	A	25		0	6	AAAAAAAAAAAAA/-;AAAAAAAAAA/-;AAAAAA/-;AAAA/-;AAAAAA/-;AAAAAA/-
6	MARCH2	19	8503614	T	19		2	4	TT/-;TTT/-;-/TTG;-/G;TT/-;T/-
6	ELAVL3	19	11563290	T	12		0	6	TT/-;T/-;TT/-;TC/-;TT/-;TTT/-
6	ZNF440	19	11944945	T	11		0	6	T/-;T/-;TT/-;T/-;T/-;T/-
6	ZNF709	19	12574741	A	21		0	6	AAAAAA/-;AAAAAAAA/-;AAAAAA/-;AAAAA/-;AAAA/-;AAAAAAAA/-
6	TNPO2	19	12810279	A	17		0	6	AAAAAA/-;AAA/-;A/-;A/-;AAAAA/-;TAAAAA/-
6	RAB8A	19	16244264	T	13		0	6	T/-;T/-;T/-;T/-;T/-;T/-
6	SLC35E1	19	16662564	T	20		0	6	TTTTTTTT/-;TT/-;TT/-;TT/-;TTTTTT/-;TTTT/-
6	PGPEP1	19	18477966	A	20		0	6	AAAAA/-;AA/-;AAA/-;AA/-;AAAAA/-;AAA/-
6	ZNF527	19	37880937	T	12		0	6	T/-;TT/-;T/-;T/-;T/-;T/-
6	SIPA1L3	19	38698672	T	17		0	6	TTTT/-;TTT/-;TT/-;T/-;T/-;T/-
6	HNRNPL	19	39327239	A	26		0	6	AAAAAAAA/-;AAAAAAAAA/-;AAAAAAA/-;AAAAAAAAAA/-;AAAAAAA/-;AAAAAAAAAA/-
6	FBXO27	19	39514873	T	12		1	5	T/-;T/-;T/-;TT/-;-/T;T/-
6	NCCRP1	19	39691953	T	16		2	4	TT/-;-/TT;T/-;T/-;-/T;T/-
6	POU2F2	19	42595123	T	14		0	6	TT/-;TTT/-;T/-;TT/-;T/-;TT/-
6	OPA3	19	46052746	T	12		2	4	T/-;-/T;TT/-;-/T;T/-;TT/-
6	GPR4	19	46093444	A	11		0	6	A/-;A/-;A/-;A/-;A/-;A/-
6	FBXO46	19	46214701	A	14		1	5	AAA/-;AA/-;A/-;-/A;A/-;AAAAA/-
6	HIF3A	19	46844456	T	19		0	6	TTTT/-;TT/-;TTTT/-;T/-;TT/-;TTTT/-
6	CCDC8	19	46914113	T	12		0	6	T/-;T/-;T/-;T/-;TT/-;T/-
6	ZNF578	19	53018985	T	12		1	5	T/-;T/-;-/T;T/-;T/-;T/-
6	FCAR	19	55401331	T	14		0	6	T/-;T/-;T/-;T/-;T/-;T/-
6	NCR1	19	55424424	T	15		1	5	TT/-;T/-;TT/-;-/T;T/-;TTT/-
6	ADRA1D	20	4201345	T	10		0	6	T/-;T/-;T/-;T/-;T/-;T/-
6	FERMT1	20	6055697	T	15		1	5	T/-;TTTT/-;-/TT;TT/-;TTTTT/-;TTT/-
6	PLCB1	20	8863119	A	10		1	5	-/A;A/-;A/-;A/-;A/-;A/-
6	PCSK2	20	17462988	A	21		2	4	AA/-;AAAAAA/-;-/AAAAA;-/AAAA;AAAAAAA/-;AAA/-
6	PLAGL2	20	30781645	A	11		0	6	A/-;A/-;A/-;A/-;A/-;A/-
6	PLAGL2	20	30784139	T	11		1	5	-/T;T/-;T/-;T/-;T/-;T/-
6	NCOA5	20	44689694	A	10		0	6	A/-;A/-;A/-;A/-;A/-;A/-
6	ATP9A	20	50214428	A	10		0	6	A/-;AA/-;A/-;A/-;A/-;A/-
6	EDN3	20	57899654	C	10		0	6	C/-;C/-;C/-;C/-;C/-;CCC/-
6	NKAIN4	20	61872617	T	12		0	6	TT/-;T/-;T/-;T/-;T/-;TT/-
6	SIM2	21	38121750	T	18		0	6	TTTT/-;TTTTTT/-;TTT/-;TGACT/-;TGACTTT/-;TT/-
6	U2AF1	21	44513111	T	11	x	1	5	T/-;-/T;T/-;T/-;TT/-;T/-
6	SIK1	21	44834508	A	11		0	6	A/-;A/-;A/-;A/-;A/-;A/-
6	AGPAT3	21	45404563	T	12		2	4	T/-;TT/-;-/G;TTG/-;T/-;-/G
6	UBE2G2	21	46191156	A	12		1	5	A/-;A/-;A/-;A/-;-/A;AA/-
6	MAPK1	22	22114661	T	12		0	6	TTT/-;T/-;T/-;T/-;TT/-;T/-
6	ADRBK2	22	26119915	A	11		1	5	-/A;A/-;A/-;A/-;A/-;AA/-
6	CCDC117	22	29183184	T	13		0	6	TTTT/-;TTT/-;TTT/-;T/-;TTT/-;T/-
6	CCDC117	22	29184962	T	16		0	6	TT/-;TTTT/-;TT/-;TT/-;TT/-;T/-
6	KREMEN1	22	29539730	A	14		1	5	AA/-;A/-;-/A;A/-;AAAAA/-;A/-
6	MTMR3	22	30422038	T	14		0	6	T/-;T/-;TT/-;T/-;T/-;T/-
6	OSBP2	22	31303620	A	11		1	5	AA/-;A/-;-/A;A/-;AA/-;AA/-
6	PRR14L	22	32081437	A	16		0	6	AAAAAA/-;AA/-;AAAA/-;A/-;A/-;AAAA/-
6	APOBEC3D	22	39428595	T	22		0	6	TT/-;TT/-;TT/-;TTTT/-;TTTT/-;TTTTT/-
6	TNRC6B	22	40731028	T	10		0	6	T/-;T/-;T/-;T/-;T/-;T/-
6	NUP50	22	45583300	A	14		0	6	A/-;AAA/-;A/-;A/-;A/-;AA/-
6	FAM118A	22	45736690	T	11		1	5	TT/-;T/-;-/T;T/-;T/-;T/-
6	ARSD	X	2822945	T	17		0	6	TTT/-;T/-;T/-;TT/-;TTTT/-;TTT/-
6	NLGN4X	X	5808269	T	11		1	5	-/T;T/-;T/-;T/-;T/-;T/-
6	HCCS	X	11140990	T	11		1	5	T/-;T/-;T/-;T/-;T/-;-/T
6	GPM6B	X	13789507	A	15		0	6	AA/-;A/-;A/-;A/-;A/-;A/-
6	EIF1AX	X	20144075	T	14		0	6	TTTTT/-;TTT/-;T/-;TTTT/-;T/-;TTT/-
6	MAGEB18	X	26158460	T	10		2	4	T/-;-/TT;T/-;-/T;T/-;T/-
6	PRRG1	X	37313538	T	10		0	6	T/-;T/-;T/-;T/-;T/-;T/-
6	MID1IP1	X	38664818	T	13		0	6	TTT/-;T/-;TT/-;TT/-;T/-;TT/-
6	DDX3X	X	41207100	T	10		0	6	TT/-;TT/-;T/-;T/-;T/-;T/-
6	DDX3X	X	41209154	T	15		0	6	TTTTTT/-;T/-;TT/-;T/-;T/-;T/-
6	HUWE1	X	53559711	T	11		0	6	T/-;T/-;T/-;T/-;T/-;T/-
6	WNK3	X	54222892	A	14		1	5	A/-;A/-;A/-;A/-;AAA/-;-/A
6	EFNB1	X	68061979	A	12		0	6	AA/-;A/-;A/-;A/-;AA/-;AA/-
6	DLG3	X	69723448	T	13		0	6	T/-;T/-;T/-;T/-;T/-;T/-
6	NLGN3	X	70390928	T	15		2	4	T/-;TT/-;-/T;T/-;-/T;TT/-
6	P2RY10	X	78217400	A	11		1	5	AA/-;-/A;A/-;A/-;A/-;A/-
6	APOOL	X	84343323	T	29		1	5	TTTTTTTTTTTTTTT/-;TTTTTTT/-;TTTTTTTTTTTTT/-;TTTTTTTT/-;-/TTTTT;TTTTTTTTTTTTTT/-
6	XIAP	X	123046067	A	12		1	5	AA/-;-/A;AA/-;AA/-;AA/-;AA/-
6	HMGB3	X	150159023	T	15		0	6	TTTT/-;T/-;TTC/-;T/-;TTTC/-;TC/-
5	LRRC47	1	3697539	A	11		1	4	A/-;-/A;A/-;A/-;AA/-
5	TNFRSF9	1	7980365	T	18		0	5	TTTTTTTT/-;TT/-;TTTTT/-;TTTT/-;TTTT/-
5	ERRFI1	1	8072322	A	11		0	5	A/-;A/-;A/-;A/-;A/-
5	H6PD	1	9328298	A	21		0	5	AAAAA/-;AAAAA/-;AAA/-;AA/-;AAAA/-
5	H6PD	1	9331007	T	12		4	1	-/TTT;-/T;-/T;T/-;-/T
5	TMEM201	1	9674450	T	10		0	5	T/-;T/-;T/-;T/-;T/-
5	NMNAT1	1	10044970	T	8		0	5	T/-;T/-;T/-;T/-;T/-
5	KIF1B	1	10438933	T	10		0	5	T/-;T/-;T/-;T/-;T/-
5	UBIAD1	1	11347986	A	13		2	3	A/-;-/A;A/-;-/A;AAA/-
5	MTHFR	1	11846484	T	10		0	5	T/-;T/-;T/-;T/-;T/-
5	MFN2	1	12073252	A	11		1	4	A/-;A/-;A/-;-/A;A/-
5	AGMAT	1	15899315	T	18		0	5	TTTTTTT/-;TT/-;TTTTTT/-;TTTT/-;TTTTTT/-
5	EIF4G3	1	21133146	T	12		0	5	T/-;T/-;TT/-;T/-;T/-
5	IFI6	1	27992801	A	23		1	4	AAAAA/-;AAAAA/-;-/AAA;AAAAAAAAA/-;AAAA/-
5	PUM1	1	31405681	T	10		1	4	T/-;T/-;-/T;T/-;T/-
5	KPNA6	1	32639764	C	9		0	5	C/-;C/-;C/-;C/-;C/-
5	TXLNA	1	32663415	T	11		0	5	TT/-;T/-;T/-;T/-;T/-
5	RBBP4	1	33148866	A	21		0	5	AAAAA/-;AAA/-;AAAAA/-;AAA/-;AAA/-
5	RNF19B	1	33402335	A	17		0	5	AAAA/-;A/-;A/-;AAA/-;AAA/-
5	EIF2C1	1	36386885	T	20		0	5	TTTTT/-;T/-;TTT/-;TT/-;TTTTT/-
5	THRAP3	1	36770606	T	11	x	0	5	T/-;TT/-;T/-;T/-;T/-
[truncated: 9,910 more rows]

## Sheet: Indels in 5'UTR
Indels in 5'UTR regions of MMR-deficient tumors as identified by whole-genome and -exome sequencing (n=16)
Nr of affected samples	Gene	Chromosome	Start Position	Affacted homopolymer base	Affected homopolymer length	Cancer Census Gene	Nr of insertions	Nr of deletions	Evidence
14	SYCP2	20	58497482	A	15		0	14	AA/-;A/-;A/-;AAA/-;A/-;A/-;A/-;A/-;A/-;A/-;AA/-;AAA/-;AAA/-;AA/-
13	GABRG2	5	161494991	A	12		0	13	A/-;AA/-;A/-;A/-;A/-;A/-;A/-;A/-;A/-;A/-;A/-;AA/-;A/-
13	LRMP	12	25205381	A	11		1	12	-/AA;A/-;A/-;A/-;A/-;A/-;A/-;A/-;A/-;A/-;A/-;A/-;A/-
12	TMEM177	2	120437062	A	11		0	12	A/-;A/-;A/-;A/-;A/-;A/-;A/-;A/-;A/-;A/-;A/-;AA/-
11	EPHB6	7	142560577	A	13		0	11	AAA/-;AA/-;A/-;AAA/-;AAA/-;A/-;A/-;A/-;AAA/-;A/-;AAG/-
11	MTUS1	8	17579505	A	13		0	11	A/-;AAAT/-;AA/-;A/-;AA/-;A/-;A/-;A/-;A/-;AA/-;AA/-
11	CCT6B	17	33288434	A	11		0	11	AA/-;A/-;A/-;A/-;A/-;A/-;A/-;A/-;A/-;A/-;A/-
11	ZNF781	19	38161162	T	11		0	11	T/-;T/-;T/-;T/-;T/-;T/-;T/-;T/-;T/-;T/-;TT/-
10	ARHGEF11	1	157014812	A	12		0	10	A/-;A/-;AA/-;A/-;A/-;A/-;A/-;A/-;A/-;A/-
10	INSIG2	2	118854095	T	13		0	10	TT/-;T/-;T/-;TT/-;T/-;T/-;T/-;T/-;T/-;T/-
10	OBFC2A	2	192543130	T	24		2	8	TTTTTTTTT/-;TTTTTTT/-;TTTT/-;TTTC/-;TTTTTC/-;-/C;TTTTTTTT/-;-/C;TTTTTTTTTTTT/-;TTTTTTT/-
10	LMOD3	3	69171665	T	13		0	10	TTTT/-;T/-;TTT/-;TTT/-;T/-;T/-;TT/-;TT/-;T/-;TT/-
10	MBNL1	3	152017898	T	11		0	10	T/-;T/-;T/-;T/-;T/-;T/-;T/-;T/-;T/-;T/-
10	TRPS1	8	116681042	A	14		0	10	AA/-;A/-;A/-;AAA/-;A/-;A/-;A/-;A/-;A/-;A/-
10	NDE1	16	15737428	T	11		0	10	TT/-;T/-;T/-;T/-;T/-;T/-;T/-;T/-;T/-;T/-
10	PHACTR3	20	58179763	T	12		0	10	TT/-;T/-;TT/-;TT/-;T/-;T/-;TT/-;T/-;TT/-;T/-
10	ARHGEF9	X	62974289	T	12		0	10	T/-;TTT/-;T/-;T/-;T/-;T/-;T/-;T/-;T/-;TT/-
9	PTP4A2	1	32385072	A	13		0	9	AAA/-;A/-;AA/-;AA/-;A/-;A/-;AA/-;AAA/-;A/-
9	NR5A2	1	199996822	T	11		0	9	T/-;T/-;T/-;T/-;T/-;T/-;T/-;T/-;T/-
9	MIR205HG	1	209602343	T	13		0	9	TTT/-;T/-;TT/-;TT/-;T/-;T/-;T/-;T/-;T/-
9	SEMA3A	7	83824177	A	14		0	9	A/-;AAAA/-;A/-;A/-;A/-;AA/-;AA/-;A/-;A/-
9	STC1	8	23712067	T	12		0	9	TT/-;TT/-;TT/-;T/-;T/-;TT/-;T/-;TT/-;T/-
9	C10orf140	10	21806929	G	10		2	7	G/-;GG/-;G/-;-/G;G/-;-/G;G/-;G/-;GG/-
9	OIT3	10	74653469	A	10		0	9	A/-;AA/-;AA/-;A/-;A/-;AAA/-;A/-;A/-;A/-
9	BDNF	11	27741185	A	10		0	9	AA/-;A/-;A/-;A/-;A/-;A/-;A/-;A/-;A/-
9	TCF4	18	53255635	A	12		2	7	GAA/-;A/-;A/-;A/-;-/A;-/A;A/-;AA/-;A/-
9	CBLN2	18	70211390	A	14		0	9	AAAA/-;A/-;A/-;A/-;A/-;A/-;A/-;A/-;AAA/-
9	MCF2	X	138724842	A	15		0	9	AA/-;AA/-;A/-;A/-;AAA/-;AAAAA/-;AAAA/-;AAAAAA/-;AAAA/-
8	PTP4A2	1	32384717	A	11		0	8	A/-;A/-;A/-;A/-;A/-;A/-;A/-;A/-
8	GLIS1	1	54199735	T	14		0	8	TTT/-;T/-;TTT/-;T/-;TT/-;T/-;T/-;T/-
8	TROVE2	1	193038177	A	9		1	7	A/-;A/-;A/-;A/-;A/-;A/-;-/A;A/-
8	RUFY3	4	71588132	T	14		0	8	TT/-;T/-;TT/-;T/-;T/-;T/-;TT/-;TTT/-
8	GRIA2	4	158142152	A	9		1	7	A/-;A/-;A/-;A/-;A/-;-/A;A/-;A/-
8	NR3C1	5	142814524	T	12		0	8	T/-;T/-;T/-;T/-;T/-;T/-;T/-;T/-
8	BMP5	6	55739712	A	14		0	8	A/-;A/-;A/-;A/-;A/-;A/-;AA/-;AA/-
8	KERA	12	91451590	A	11		0	8	A/-;A/-;A/-;A/-;A/-;A/-;A/-;A/-
8	LYSMD2	15	52030237	A	13		0	8	A/-;AA/-;A/-;A/-;AA/-;A/-;A/-;AA/-
8	SEZ6L2	16	29910432	T	22		0	8	TTTTTTTT/-;TTTTTTTT/-;TTTTTTTT/-;TTTTTTT/-;TTTTTTT/-;TT/-;TTTTTT/-;TTTTTTTTT/-
8	PHACTR3	20	58179933	T	22		0	8	TTTTTTT/-;TTTTT/-;TT/-;TTTTT/-;T/-;TTTTTT/-;TTTTTTTTT/-;TTTTTTTTTT/-
8	KCNE1	21	35827936	T	12		0	8	T/-;TT/-;T/-;TT/-;T/-;TT/-;TT/-;TT/-
8	EBP	X	48382100	T	18		0	8	TT/-;TTTTTT/-;TTTT/-;TTT/-;TTTT/-;TTT/-;TTTTTT/-;TTT/-
8	WDR13	X	48456721	T	12		0	8	T/-;T/-;T/-;T/-;T/-;T/-;T/-;T/-
7	PKN2	1	89150151	T	13		0	7	TTT/-;TT/-;T/-;T/-;T/-;T/-;TTTT/-
7	MAB21L3	1	116655184	A	13		0	7	A/-;A/-;A/-;A/-;A/-;A/-;A/-
7	RAPGEF4	2	173686466	A	24		0	7	AAAAAA/-;AAAAAA/-;AAAAA/-;AAAAA/-;AAAAA/-;AAAAAAAA/-;AAAAAAAA/-
7	BTLA	3	112218320	A	16		1	6	-/A;A/-;AA/-;AA/-;A/-;A/-;AAA/-
7	USP53	4	120135276	A	18		0	7	AAAA/-;A/-;AAA/-;A/-;A/-;A/-;AA/-
7	SEMA6A	5	115910135	A	11		0	7	AA/-;A/-;A/-;A/-;A/-;A/-;A/-
7	AMD1	6	111196179	A	11		1	6	A/-;-/A;A/-;A/-;A/-;A/-;AA/-
7	CNTNAP2	7	145813628	T	11		1	6	T/-;T/-;T/-;-/T;T/-;T/-;T/-
7	C8orf80	8	27941309	A	15		0	7	AA/-;AAA/-;AA/-;AAA/-;A/-;AAA/-;AA/-
7	ASPH	8	62602296	A	11		1	6	A/-;A/-;-/A;A/-;A/-;A/-;A/-
7	GSDMC	8	130798568	A	14		0	7	AA/-;AAA/-;AA/-;A/-;AA/-;A/-;A/-
7	OMD	9	95179845	T	11	x	0	7	T/-;T/-;T/-;T/-;T/-;T/-;T/-
7	TCF7L2	10	114710209	T	14	x	1	6	TT/-;T/-;T/-;-/T;T/-;T/-;T/-
7	SLC6A15	12	85285921	A	17		0	7	AAAA/-;AA/-;AAA/-;A/-;AA/-;AAAAA/-;A/-
7	WFIKKN2	17	48912896	T	13		0	7	TTT/-;TT/-;TC/-;TC/-;TT/-;TCC/-;TTTC/-
6	ST7L	1	113162030	C	10		1	5	CC/-;C/-;-/CC;C/-;C/-;C/-
6	TRIB2	2	12857256	G	8		5	1	-/G;-/G;-/G;G/-;-/G;-/G
6	GEN1	2	17935495	T	11		0	6	TT/-;T/-;T/-;T/-;T/-;T/-
6	MEIS1	2	66662691	T	13		0	6	T/-;TTT/-;T/-;T/-;T/-;T/-
6	SATB1	3	18465614	A	13		0	6	A/-;A/-;A/-;A/-;A/-;A/-
6	MOBP	3	39521532	A	13		0	6	A/-;A/-;A/-;A/-;A/-;A/-
6	HSD17B11	4	88312252	T	15		0	6	TTTT/-;TT/-;TTTT/-;TT/-;TTTT/-;TTTTT/-
6	EIF4E	4	99850451	T	20		0	6	TTTTT/-;TTTTTTT/-;TT/-;TTTTT/-;TT/-;TTTTT/-
6	EIF4E	4	99851376	T	11		1	5	TT/-;T/-;T/-;T/-;T/-;-/T
6	LRRC70	5	61874620	A	18		0	6	AA/-;AAA/-;A/-;A/-;A/-;A/-
6	NMUR2	5	151784732	A	16		1	5	AAAA/-;A/-;AA/-;-/A;AAAAAA/-;A/-
6	SEMA3E	7	83278199	A	16		0	6	AAAA/-;AA/-;AA/-;AA/-;AAA/-;AA/-
6	PILRB	7	99955639	A	19		0	6	AA/-;AAAAAA/-;AA/-;AAAA/-;A/-;AAAAA/-
6	TOX	8	60031708	A	14		0	6	AA/-;A/-;A/-;AA/-;A/-;A/-
6	C10orf140	10	21807470	A	13		0	6	AAA/-;A/-;A/-;A/-;A/-;A/-
6	LRRC4C	11	40314471	A	10		0	6	AA/-;A/-;A/-;A/-;A/-;AAA/-
6	TMEM220	17	10633539	A	15		0	6	AAAA/-;AAA/-;AA/-;AAAA/-;A/-;AAA/-
6	ESCO1	18	19164372	A	11		0	6	A/-;A/-;A/-;A/-;A/-;A/-
6	LPHN1	19	14316983	A	15		0	6	AA/-;A/-;A/-;A/-;AA/-;A/-
6	DDX3X	X	41192965	A	10		3	3	A/-;-/AA;A/-;-/A;-/A;A/-
6	ZXDB	X	57618381	T	9		0	6	T/-;T/-;T/-;T/-;T/-;T/-
6	LPAR4	X	78003393	A	31		1	5	AAAAAAAAAAAAAA/-;AAAAAA/-;-/TGG;AAAAAAAA/-;AAAAAAAAAAAA/-;AAAAAAAA/-
6	TMEM31	X	102965990	T	10		2	4	TT/-;T/-;-/T;T/-;T/-;-/T
5	DHRS3	1	12677526	A	21		0	5	AAAAA/-;AAAAA/-;AAAAAA/-;AAAAAA/-;AAAAA/-
5	RCC2	1	17766109	T	10		1	4	T/-;T/-;T/-;T/-;-/T
5	ARHGEF11	1	157014871	A	11		1	4	-/A;A/-;A/-;A/-;A/-
5	PBX1	1	164528905	T	10	x	1	4	T/-;-/T;T/-;T/-;T/-
5	NLRP3	1	247581610	T	12		1	4	T/-;-/T;T/-;T/-;T/-
5	AAK1	2	69870218	T	24		0	5	TTTTTTT/-;TTT/-;TTTTT/-;TTTTT/-;TTTTTTTT/-
5	SCN2A	2	166150521	A	28		0	5	AAAAAAAAAAAA/-;AAAAAAAAAA/-;AAAAAAA/-;AAAAAAAAAAAAGATT/-;AAAAAAAAAGATTT/-
5	SCN2A	2	166150551	T	13		1	4	TT/-;T/-;AAAAAAAAAAAAGATT/-;-/T;AAAAAAAAAGATTT/-
5	SEPT2	2	242256951	T	17		0	5	TTTTTT/-;TTT/-;TTT/-;TTT/-;TT/-
5	HES1	3	193854149	A	16		0	5	AAA/-;AA/-;AAA/-;A/-;AAA/-
5	STIM2	4	26862547	T	18		0	5	TTTT/-;TTT/-;TTTTT/-;TTTTT/-;TTTTTT/-
5	RAPGEF2	4	160189201	T	11		0	5	T/-;T/-;T/-;T/-;T/-
5	SKIV2L2	5	54603687	A	13		0	5	AAA/-;A/-;A/-;AA/-;A/-
5	C6orf62	6	24719384	A	20		0	5	AAAAA/-;AA/-;AA/-;AAAA/-;AAA/-
5	CALCR	7	93188929	T	13		3	2	TT/-;-/T;T/-;-/T;-/T
5	C8orf46	8	67405682	A	20		0	5	AAAAAA/-;AAAAAAA/-;AAAAAA/-;A/-;AAAAAAA/-
5	IGF2	11	2159619	G	12		0	5	TG/-;GG/-;GG/-;GGG/-;GGG/-
5	PRR5L	11	36397656	T	12		0	5	T/-;T/-;T/-;TT/-;T/-
5	ATG13	11	46639091	C	12		0	5	CC/-;CC/-;CC/-;CC/-;C/-
5	PPP2R5B	11	64693087	C	10		0	5	C/-;C/-;C/-;C/-;C/-
5	XRRA1	11	74656099	T	10		0	5	T/-;T/-;T/-;T/-;T/-
5	SCN2B	11	118047235	A	9		0	5	AA/-;A/-;A/-;A/-;A/-
5	SIAE,SPA17	11	124543763	T	15		3	2	-/T;TT/-;T/-;-/T;-/T
5	PRMT8	12	3600692	T	11		0	5	TT/-;T/-;T/-;TT/-;T/-
5	NELL2	12	45269440	A	12		0	5	A/-;A/-;A/-;A/-;AA/-
5	PTPRB	12	71031211	A	10		0	5	A/-;A/-;A/-;A/-;AA/-
5	KDM2B	12	122018158	G	10		0	5	G/-;G/-;G/-;G/-;G/-
5	LMO7	13	76195057	A	9		0	5	A/-;A/-;A/-;A/-;A/-
5	SLITRK1	13	84455887	A	20		0	5	AAAAAAA/-;AAAAA/-;AAAAAA/-;AA/-;AAAAAA/-
5	C14orf182	14	50473340	T	15		0	5	TT/-;TT/-;TT/-;T/-;TTT/-
5	C14orf43	14	74226841	A	13		0	5	A/-;A/-;A/-;A/-;A/-
5	GTF2A1	14	81686923	A	13		0	5	AA/-;A/-;A/-;A/-;A/-
5	MEIS2	15	37391753	T	12		0	5	TTTT/-;T/-;TT/-;TTT/-;T/-
5	TIGD7	16	3350677	A	10		1	4	A/-;A/-;A/-;-/A;A/-
5	CHST5	16	75565219	A	17		1	4	AAAAA/-;AA/-;AA/-;-/AA;A/-
5	WFIKKN2	17	48912909	C	6		0	5	TC/-;TC/-;CC/-;TCC/-;TTTC/-
5	CBLN2	18	70211441	A	9		2	3	A/-;-/A;A/-;-/A;A/-
5	TSHZ1	18	72922852	G	11		0	5	G/-;GG/-;GG/-;G/-;G/-
5	TSHZ1	18	72922943	T	10		2	3	-/T;-/T;T/-;T/-;T/-
5	PDGFB	22	39640807	T	16	x	1	4	TTT/-;-/T;TTT/-;TT/-;TTTTT/-
5	SLC38A5	X	48327812	T	12		1	4	TT/-;T/-;T/-;T/-;-/T
5	WDR13	X	48457035	C	11		1	4	-/CC;C/-;CC/-;C/-;CC/-
5	ZXDA	X	57936947	A	9		0	5	A/-;A/-;A/-;A/-;A/-
4	PABPC4	1	40042346	T	11		0	4	T/-;T/-;T/-;T/-
4	LMO4	1	87794753	A	15		0	4	AA/-;AAA/-;AAA/-;AAAAA/-
4	CEPT1	1	111690320	A	9		1	3	A/-;A/-;-/A;A/-
4	RGS4	1	163038839	T	10		0	4	T/-;T/-;T/-;T/-
4	UGP2	2	64069278	A	15		0	4	AAA/-;A/-;A/-;AAA/-
4	ACVR2A	2	148602570	T	27		0	4	TTTTTTTTT/-;TTTTT/-;TTTTT/-;TTTTTTTTTTTT/-
4	HOXD3	2	177028842	A	10		0	4	A/-;A/-;A/-;A/-
4	OBFC2A	2	192543010	T	9		1	3	T/-;T/-;-/T;T/-
4	TBC1D5	3	17781828	A	14		0	4	A/-;A/-;A/-;A/-
4	OSBPL11	3	125313711	T	11		0	4	TT/-;T/-;T/-;T/-
4	PLSCR5	3	146323323	T	12		0	4	TTT/-;TTT/-;T/-;T/-
4	MBNL1	3	152017453	A	10		0	4	A/-;A/-;A/-;A/-
4	FSTL5	4	163084834	A	12		2	2	AA/-;-/A;-/A;A/-
4	PIK3R1	5	67584513	T	12	x	1	3	TT/-;-/T;TT/-;TT/-
4	SOX4	6	21594357	A	16		0	4	AA/-;AA/-;A/-;AAA/-
4	FAM65B	6	24877344	A	8		1	3	A/-;-/A;A/-;A/-
4	BRD2	6	32936749	G	9		2	2	-/G;-/G;G/-;G/-
4	ABCC10	6	43399533	T	10		0	4	T/-;T/-;T/-;TT/-
4	L3MBTL3	6	130339786	A	10		1	3	A/-;A/-;-/A;A/-
4	ZNF107	7	64152285	A	8		0	4	A/-;A/-;A/-;A/-
4	SEMA3A	7	83824113	A	17		0	4	AA/-;A/-;AA/-;AAAA/-
4	TRIP6	7	100464996	A	10		0	4	A/-;A/-;A/-;A/-
4	RALYL	8	85095861	T	8		0	4	T/-;T/-;T/-;T/-
4	ZHX2	8	123793954	T	11		0	4	T/-;T/-;T/-;T/-
4	HEMGN	9	100700506	A	11		0	4	A/-;A/-;AA/-;AA/-
4	C1QL3	10	16563614	T	10		0	4	T/-;T/-;T/-;TT/-
4	C10orf140	10	21807780	T	18		1	3	TTTT/-;TTTT/-;-/TT;TTT/-
4	HIF1AN	10	102295646	T	13		3	1	-/T;-/T;-/T;TT/-
4	VAX1	10	118897622	G	10		0	4	AAAGG/-;GGGC/-;AAAGG/-;AGG/-
4	NCAM1	11	112832277	G	10		0	4	G/-;G/-;G/-;G/-
4	HYLS1	11	125753770	A	10		1	3	A/-;A/-;-/A;A/-
4	KDM5A	12	498268	G	15	x	0	4	GGGGG/-;GGGGGG/-;GGGG/-;GGGGGG/-
4	EMP1	12	13364427	A	10		0	4	A/-;A/-;A/-;A/-
4	RASSF9	12	86230254	A	12		0	4	A/-;A/-;AAAAG/-;AA/-
4	TBX3	12	115121596	A	13		0	4	A/-;AA/-;A/-;AA/-
4	TGFB3	14	76447772	A	11		1	3	A/-;A/-;-/A;A/-
4	NRXN3	14	79746443	T	10		0	4	T/-;T/-;T/-;T/-
4	PPP2R5C	14	102276206	T	11		1	3	T/-;-/T;T/-;T/-
4	NR2F2	15	96874921	T	11		0	4	TT/-;T/-;T/-;T/-
4	ABAT	16	8807141	A	15		1	3	A/-;-/AA;A/-;A/-
4	CDH3	16	68678639	A	16		1	3	AA/-;A/-;-/A;A/-
4	HEXIM1	17	43226462	T	10		1	3	T/-;T/-;-/TT;T/-
4	SETBP1	18	42260911	G	8	x	3	1	-/G;-/G;-/G;G/-
4	CPLX4	18	56985740	A	10		1	3	A/-;A/-;A/-;-/A
4	STK11	19	1206797	T	10	x	0	4	T/-;T/-;T/-;T/-
4	HNRNPUL1	19	41770307	C	9		2	2	-/C;C/-;C/-;-/C
4	JAG1	20	10654553	A	11		1	3	A/-;A/-;-/C;A/-
4	RBMX	X	135961588	T	13		0	4	TGTTT/-;TT/-;TGTT/-;T/-
3	ATAD3C	1	1385703	A	19		0	3	AAAAA/-;AAA/-;AAAAAAAA/-
3	DHRS3	1	12677725	A	13		0	3	A/-;A/-;A/-
3	TXNDC12	1	52520880	T	11		0	3	T/-;T/-;T/-
3	EXTL2	1	101360284	T	9		0	3	T/-;T/-;T/-
3	PRPF38B	1	109235175	C	8		1	2	C/-;C/-;-/C
3	ANKRD34A	1	145472432	C	20		0	3	CCCCCCCG/-;CCCCCCC/-;CCCCCCCCCCC/-
3	ARHGEF11	1	157014652	A	10		0	3	A/-;A/-;AA/-
3	RFWD2	1	176176258	T	9		0	3	T/-;T/-;T/-
3	PAPPA2	1	176525111	A	9		1	2	A/-;-/A;A/-
3	CDC42BPA	1	227505213	A	17		0	3	A/-;AA/-;AA/-
3	IL18RAP	2	103035369	T	8		0	3	T/-;T/-;T/-
3	HNMT	2	138721943	T	17		0	3	TTTTT/-;TT/-;TTT/-
3	RFTN2	2	198540313	A	16		2	1	AA/-;-/A;-/A
3	HTR2B	2	231988611	A	11		0	3	A/-;A/-;A/-
3	VGLL4	3	11685144	A	13		1	2	A/-;-/A;A/-
3	SATB1	3	18465220	T	11		1	2	T/-;-/T;TT/-
3	SATB1	3	18465378	A	10		0	3	A/-;A/-;AA/-
3	UBE2E2	3	23244944	C	8		3	0	-/T;-/C;-/T
3	VPRBP	3	51533912	C	9		2	1	-/C;-/C;C/-
3	SENP7	3	101232058	A	32		0	3	AAAAAAAAAAAAAAAAA/-;AAAAAAAAAAAA/-;GAAA/-
3	ZIC1	3	147127317	T	18		0	3	TTTT/-;TT/-;T/-
3	ZIC1	3	147127528	T	9		0	3	T/-;T/-;T/-
3	P2RY14	3	150937332	T	8		0	3	T/-;T/-;T/-
3	RAB28	4	13485808	G	8		0	3	G/-;G/-;G/-
3	GRID2	4	93225753	A	12		0	3	A/-;A/-;AA/-
3	ERBB2IP	5	65222389	T	13		1	2	T/-;-/T;T/-
3	ZNF608	5	124080776	A	10		0	3	A/-;A/-;A/-
3	PHF15	5	133861863	G	8		1	2	G/-;-/G;G/-
3	UBE2D2	5	138941982	A	10		0	3	A/-;A/-;A/-
3	JAKMIP2	5	147162133	T	10		1	2	-/T;T/-;T/-
3	EBF1	5	158526535	A	15	x	1	2	A/-;A/-;-/A
3	EBF1	5	158526597	T	11	x	0	3	T/-;T/-;T/-
3	CCDC99	5	169015404	A	8		0	3	A/-;A/-;A/-
3	HRH2	5	175110095	A	21		0	3	AAAAAAAA/-;AAAA/-;AA/-
3	GABRR1	6	89927156	A	10		1	2	A/-;A/-;-/A
3	C6orf203	6	107349967	T	7		3	0	-/T;-/T;-/T
3	MARCKS	6	114178628	T	9		0	3	T/-;T/-;T/-
3	TSPAN12	7	120498054	A	16		0	3	AAAA/-;A/-;A/-
3	DPP6	7	153584641	T	9		1	2	-/T;T/-;T/-
3	CSGALNACT1	8	19459834	A	8		1	2	A/-;A/-;-/A
3	PEX2	8	77912372	A	10		0	3	A/-;A/-;A/-
3	CPQ	8	97797118	A	9		0	3	A/-;A/-;A/-
3	RIMS2	8	104831719	A	9		0	3	A/-;A/-;A/-
3	TRPS1	8	116680911	C	8		0	3	C/-;C/-;C/-
3	ZHX2	8	123793943	T	9		0	3	T/-;TC/-;TC/-
3	UBE2R2	9	33817431	C	10		0	3	C/-;C/-;C/-
3	TLE4	9	82187004	A	10		0	3	A/-;A/-;A/-
3	CACNB2	10	18689570	T	17		0	3	TT/-;TT/-;TT/-
3	MTPAP	10	30638209	A	22		0	3	AAAA/-;AAA/-;AAAAAAAA/-
3	LOC729020	10	105005684	A	13		3	0	-/A;-/A;-/A
3	VAX1	10	118897608	A	14		0	3	AAAGG/-;AAAGG/-;AGG/-
3	DHX32	10	127569732	T	12		0	3	T/-;T/-;TT/-
3	MRGPRF	11	68780848	C	8		2	1	-/C;C/-;-/C
3	PARP11	12	3982462	T	11		0	3	T/-;T/-;T/-
3	SP1	12	53774021	C	8		3	0	-/C;-/C;-/C
3	SLITRK1	13	84456386	T	10		0	3	T/-;T/-;T/-
3	GAS6	13	114538617	A	9		0	3	A/-;A/-;A/-
3	NOVA1	14	27066756	T	12		0	3	GT/-;T/-;TT/-
3	MPP5	14	67745784	T	11		1	2	-/T;T/-;T/-
3	C14orf1	14	76127461	A	16		0	3	AAAAA/-;AA/-;AAAAA/-
3	FLRT2	14	86087802	T	10		1	2	T/-;-/T;T/-
3	C15orf33	15	49913098	C	10		2	1	-/C;-/C;C/-
3	EVI2A	17	29648731	A	13		0	3	AA/-;A/-;A/-
3	SETBP1	18	42260904	T	7	x	2	1	-/G;-/G;T/-
3	ARHGEF18	19	7504771	T	10		1	2	T/-;-/T;T/-
3	KCNJ14	19	48964786	A	22		0	3	AAAAAAAAA/-;AAAAAA/-;AAAA/-
3	FAM110A	20	825319	T	14		0	3	TT/-;TT/-;T/-
3	DYRK1A	21	38792381	T	10		1	2	-/T;T/-;T/-
3	MORC2	22	31364062	T	9		1	2	T/-;-/T;T/-
3	COL4A5	X	107683189	T	10		1	2	T/-;-/T;T/-
2	PAX7	1	18957988	A	8	x	0	2	A/-;A/-
2	FOXE3	1	47881908	G	9		1	1	-/G;G/-
2	BRDT	1	92415147	T	6		0	2	T/-;T/-
2	NTNG1	1	107682675	G	7		0	2	G/-;G/-
2	DENND4B	1	153916853	C	8		0	2	C/-;C/-
2	ARHGEF11	1	157014371	A	9		0	2	A/-;A/-
2	SPTA1	1	158656433	A	11		0	2	A/-;AA/-
2	C1orf112	1	169764935	T	9		0	2	T/-;T/-
2	PAPPA2	1	176525105	G	6		2	0	-/G;-/A
2	RD3	1	211665206	A	9		2	0	-/A;-/A
2	TRIB2	2	12858399	T	9		0	2	T/-;T/-
2	EPAS1	2	46524701	T	10		0	2	T/-;T/-
2	USP34	2	61697841	C	9		1	1	C/-;-/C
2	POLR1A	2	86333065	G	8		1	1	G/-;-/G
2	MALL	2	110873471	A	14		0	2	A/-;AAAA/-
2	EN1	2	119605377	A	10		0	2	A/-;A/-
2	CLASP1	2	122407040	A	15		0	2	AAAAA/-;AAAAAAG/-
2	SCN3A	2	166060426	T	22		0	2	TTTTTT/-;TT/-
2	RFTN2	2	198540338	A	16		0	2	AAC/-;AAAAAC/-
2	INO80D	2	206950636	T	10		0	2	T/-;T/-
2	CCR2	3	46395501	T	10		0	2	T/-;T/-
2	ARL14	3	160395090	A	12		0	2	A/-;AA/-
2	GABRB1	4	47033324	A	8		1	1	-/A;A/-
2	RUFY3	4	71587799	T	10		0	2	T/-;T/-
2	ARHGAP24	4	86851836	A	10		0	2	A/-;A/-
2	SPARCL1	4	88450651	T	8		0	2	T/-;T/-
2	ARSJ	4	114900261	A	10		1	1	A/-;-/A
2	USP53	4	120160604	A	8		0	2	A/-;A/-
2	PCDH10	4	134071097	A	9		1	1	A/-;-/A
2	PCDH10	4	134071216	T	9		0	2	T/-;T/-
2	FSTL5	4	163084872	A	9		0	2	A/-;A/-
2	GPM6A	4	176733453	T	39		0	2	GGGTTTTTTTTTTTTTTTTTTTTT/-;GT/-
2	FAM173B	5	10250010	A	37		0	2	AAAAAAAAAAAAAAAAAAA/-;TAAAAAAAAAAAAAA/-
2	NPR3	5	32711673	T	10		2	0	-/TTTTC;-/TTTC
2	PCDHGA8	5	140771873	T	8		0	2	T/-;T/-
2	NR3C1	5	142782878	T	10		1	1	T/-;-/T
2	MGAT1	5	180235813	G	7		0	2	G/-;G/-
2	ID4	6	19837755	T	9		0	2	T/-;T/-
2	LRRC16A	6	25279840	T	14		0	2	TT/-;TTT/-
2	PBX2	6	32157697	G	9		0	2	G/-;G/-
2	VEGFA	6	43738128	T	9		0	2	T/-;T/-
2	BAI3	6	69345668	T	8		0	2	T/-;T/-
2	OLIG3	6	137815376	A	12		0	2	A/-;A/-
2	C6orf211	6	151773568	T	9		1	1	T/-;-/T
2	OPRM1	6	154408265	A	8		0	2	A/-;A/-
2	CCDC126	7	23650855	T	10		1	1	-/T;T/-
2	CAV1	7	116165017	T	7		0	2	T/-;T/-
2	DPP6	7	153749806	T	13		0	2	T/-;TT/-
2	CLN8	8	1711890	G	6		2	0	-/G;-/G
2	SGCZ	8	15095423	A	9		0	2	A/-;A/-
2	DPYSL2	8	26435692	A	8		2	0	-/A;-/A
2	NRG1	8	32505075	C	6		1	1	C/-;-/C
2	SULF1	8	70379174	T	9		1	1	-/T;T/-
2	RALYL	8	85095849	T	8		2	0	-/T;-/T
2	RALYL	8	85095893	T	8		2	0	-/T;-/T
2	RALYL	8	85096324	T	8		0	2	T/-;T/-
2	EEF1D	8	144679652	G	9		1	1	G/-;-/G
2	VPS28	8	145652341	G	8		1	1	-/G;G/-
2	UBE2R2	9	33817458	G	9		0	2	G/-;G/-
2	FAM214B	9	35108330	G	6		1	1	G/-;-/G
2	TLE4	9	82187065	A	8		0	2	A/-;A/-
2	FAM208B	10	5754805	A	8		0	2	A/-;A/-
2	CPEB3	10	94050746	T	6		0	2	T/-;T/-
2	TCF7L2	10	114710317	C	8	x	1	1	-/C;C/-
2	TCF7L2	10	114710419	T	6	x	2	0	-/T;-/G
2	TCF7L2	10	114710451	T	8	x	0	2	T/-;T/-
2	VAX1	10	118897641	A	10		0	2	A/-;A/-
2	TNNT3	11	1940827	C	8		1	1	-/C;C/-
2	LRRC4C	11	40314196	T	8		0	2	T/-;T/-
2	LRRC4C	11	40315208	A	10		0	2	A/-;A/-
2	SERPING1	11	57365112	C	8		0	2	C/-;C/-
2	PPP2R5B	11	64693060	G	9		1	1	-/G;G/-
2	PAK1	11	77184814	G	8		1	1	G/-;-/G
2	PHLDB1	11	118478397	C	10		0	2	C/-;C/-
2	FOXJ2	12	8186100	G	7		1	1	G/-;-/G
2	CDKN1B	12	12870343	A	7		0	2	A/-;A/-
2	BHLHE41	12	26277871	C	8		1	1	C/-;-/C
2	PUS7L	12	44152458	C	12		0	2	C/-;CCCCCA/-
2	ACVRL1	12	52306155	A	8		0	2	A/-;A/-
2	ASCL1	12	103351686	T	10		0	2	T/-;T/-
2	TBX3	12	115121068	T	7		1	1	T/-;-/T
2	CAMKK2	12	121735661	T	20		0	2	TTTTTT/-;TTTT/-
2	LATS2	13	21620223	A	11		1	1	-/A;A/-
2	ING1	13	111367630	A	11		0	2	A/-;A/-
2	JPH4	14	24047571	G	7		2	0	-/G;-/G
2	NPAS3	14	33408505	A	8		0	2	A/-;A/-
2	NKX2-1	14	36988599	A	8	x	0	2	A/-;A/-
2	GTF2A1	14	81687082	A	15		0	2	AA/-;A/-
2	MKRN3	15	23810478	T	8		0	2	T/-;T/-
2	IVD	15	40697731	A	7		1	1	-/A;A/-
2	SV2B	15	91769336	G	9		1	1	G/-;-/G
2	TMC5	16	19451285	A	12		0	2	AA/-;AA/-
2	SBK1	16	28304462	C	8		0	2	C/-;C/-
2	GNAO1	16	56226072	G	7		0	2	G/-;G/-
2	CYB5D2	17	4046824	A	15		0	2	A/-;A/-
2	DNAH9	17	11786479	T	9		1	1	-/T;T/-
2	KCNH4	17	40333160	C	7		1	1	C/-;-/C
2	HOXB3	17	46629934	C	12		0	2	CCC/-;CC/-
2	HOXB3	17	46651513	T	10		2	0	-/T;-/T
2	POTEC	18	14543387	C	7		0	2	C/-;C/-
2	TRAPPC8	18	29522914	C	8		0	2	C/-;C/-
2	ZNF121	19	9678803	A	9		0	2	A/-;A/-
2	RFX1	19	14104689	T	14		1	1	-/T;T/-
2	KIAA0355	19	34790747	A	10		1	1	-/A;A/-
2	SAMD4B	19	39842791	T	9		0	2	T/-;T/-
2	LYPD4	19	42347974	A	25		0	2	AAAAAAA/-;AAAAAAA/-
2	KCNJ14	19	48964592	A	11		0	2	A/-;AA/-
2	ZNF417	19	58427895	C	8		1	1	C/-;-/C
2	RBCK1	20	388906	C	7		2	0	-/C;-/C
2	REM1	20	30064233	C	8		1	1	C/-;-/C
2	RBM39	20	34330038	A	8		1	1	A/-;-/A
2	VAPB	20	56964359	C	9		0	2	C/-;C/-
2	ASPHD2	22	26829563	C	7		0	2	C/-;C/-
2	TMEM27	X	15682932	A	10		0	2	A/-;A/-
2	IL1RAPL1	X	28605877	T	11		0	2	T/-;TT/-
2	BEX5	X	101409255	T	16		0	2	TTTT/-;TTTT/-
2	TCEAL1	X	102883894	T	8		1	1	-/T;T/-
1	RERE	1	8877521	T	15		0	1	TTT/-
1	PTCHD2	1	11539363	C	6		0	1	C/-
1	DHRS3	1	12677795	A	26		0	1	AAAAAAAAAA/-
1	HNRNPR	1	23670794	C	8		1	0	-/C
1	KIAA0754	1	39875661	A	8		0	1	A/-
1	C1orf210	1	43751195	C	7		0	1	C/-
1	ELAVL4	1	50574698	C	7		0	1	C/-
1	CDKN2C	1	51434449	A	7	x	1	0	-/A
1	RNF11	1	51702136	G	7		0	1	G/-
1	RNF11	1	51702171	C	13		0	1	CCC/-
1	TTC39A	1	51787846	C	7		1	0	-/C
1	JUN	1	59248836	C	6	x	1	0	-/C
1	NFIA	1	61547569	A	7		0	1	A/-
1	ANKRD13C	1	70820110	G	7		1	0	-/G
1	IFI44L	1	79086101	T	7		1	0	-/T
1	GBP6	1	89829577	T	8		1	0	-/T
1	NTNG1	1	107691083	A	9		0	1	A/-
1	WNT2B	1	113051789	C	6		0	1	C/-
1	NHLH2	1	116383146	T	6		0	1	T/-
1	FAM72B	1	120839684	A	10		1	0	-/A
1	FAM72D	1	143912436	T	9		0	1	T/-
1	HFE2	1	145413263	C	6		0	1	C/-
1	TXNIP	1	145438750	T	9		0	1	T/-
1	PIP5K1A	1	151171030	T	6		1	0	-/T
1	CELF3	1	151689122	C	6		0	1	C/-
1	RUSC1-AS1	1	155291284	G	6		0	1	G/-
1	ARHGEF11	1	157014344	A	9		0	1	A/-
1	ARHGEF11	1	157014457	A	9		1	0	-/A
1	KCNJ9	1	160051412	G	8		1	0	-/G
1	VANGL2	1	160370521	C	8		1	0	-/C
1	VANGL2	1	160385568	C	6		0	1	C/-
1	TOMM40L	1	161195894	G	6		0	1	G/-
1	APOBEC4	1	183622267	T	8		0	1	T/-
1	HMCN1	1	185703900	A	8		0	1	A/-
1	CDC73	1	193091320	G	8		0	1	G/-
1	ETNK2	1	204121029	G	7		1	0	-/G
1	TMCC2	1	205197541	T	10		0	1	T/-
1	TGFB2	1	218519740	T	7		1	0	-/T
1	TGFB2	1	218519992	T	8		0	1	T/-
1	SPHAR	1	229440672	A	6		0	1	A/-
1	ARID4B	1	235491307	C	7		0	1	C/-
1	CHML	1	241799220	T	8		0	1	T/-
1	MAP1LC3C	1	242162343	A	9		1	0	-/A
1	TRIB2	2	12857835	C	8		0	1	C/-
1	C2orf53	2	27362305	C	6		0	1	C/-
1	CDC42EP3	2	37898964	G	9		1	0	-/AGGG
1	NRXN1	2	50574450	G	6		0	1	G/-
1	NRXN1	2	51255432	G	7		1	0	-/GG
1	CCDC85A	2	56411376	G	6		0	1	GG/-
1	BCL11A	2	60780618	A	29	x	0	1	AAGCAA/-
1	XPO1	2	61765177	C	13	x	0	1	CCC/-
1	MEIS1	2	66662664	T	8		0	1	T/-
1	MEIS1	2	66662734	T	8		0	1	T/-
1	MEIS1	2	66662876	T	24		0	1	TTTT/-
1	MGAT4A	2	99279845	A	7		0	1	A/-
1	PTPN4	2	120517919	T	7		0	1	T/-
1	ARL5A	2	152684705	C	9		1	0	-/CC
1	TBR1	2	162272776	A	10		0	1	A/-
1	SCN3A	2	166060477	T	8		0	1	T/-
1	DHRS9	2	169927184	A	7		0	1	A/-
1	SP3	2	174830022	T	9		1	0	-/T
1	SCRN3	2	175263005	A	8		1	0	-/A
1	HOXD8	2	176994560	G	8		1	0	-/G
1	HOXD4	2	177016313	A	7		0	1	A/-
1	ASNSD1	2	190528637	A	6		1	0	-/A
1	C2orf88	2	191045707	C	6		1	0	-/C
1	BMPR2	2	203241980	C	7		0	1	C/-
1	WDR12	2	203776798	T	9		0	1	T/-
1	NBEAL1	2	203881067	T	7		0	1	T/-
1	KLF7	2	208030440	A	11		0	1	AA/-
1	IGFBP5	2	217559815	A	7		0	1	A/-
1	IGFBP5	2	217560074	A	7		0	1	A/-
1	DNAJB2	2	220144046	C	7		1	0	-/C
1	MFF	2	228194359	A	7		0	1	A/-
1	SEPT2	2	242254941	C	6		0	1	C/-
1	HDLBP	2	242255093	C	8		1	0	-/C
1	ARL8B	3	5163960	G	6		1	0	-/G
1	OXTR	3	8810952	C	6		0	1	C/-
1	TBC1D5	3	17781510	A	11		0	1	A/-
1	FAM19A1	3	68053659	T	9		0	1	T/-
1	FAM19A1	3	68053699	T	13		0	1	TTT/-
1	ALCAM	3	105085821	C	7		0	1	C/-
1	ARHGAP31	3	119013643	C	6		0	1	C/-
1	ANAPC13,CEP63	3	134204834	C	11		0	1	CCC/-
1	SHOX2	3	157823897	C	7		0	1	C/-
1	PDCD10	3	167438020	T	6		0	1	T/-
1	UTS2D	3	190999982	A	8		0	1	A/-
1	UTS2D	3	191048278	T	8		0	1	T/-
1	MRFAP1L1	4	6711494	T	9		0	1	T/-
1	FGFBP1	4	15939956	G	6		1	0	-/G
1	PACRGL	4	20702149	C	8		1	0	-/C
1	SEPSECS	4	25162104	A	6		1	0	-/A
1	STIM2	4	26862538	C	6		0	1	C/-
1	PCDH7	4	30722193	A	6		1	0	-/A
1	APBB2	4	41102697	T	7		0	1	T/-
1	GUF1	4	44680560	G	6		0	1	G/-
1	GNRHR	4	68621586	A	10		0	1	A/-
1	CCNI	4	77997048	A	13		0	1	A/-
1	ARHGAP24	4	86851827	A	8		0	1	A/-
1	ARHGAP24	4	86851884	T	9		0	1	T/-
1	UBE2D3	4	103748955	G	6		0	1	G/-
1	SGMS2	4	108816641	A	6		0	1	A/-
1	PITX2	4	111544003	C	10		0	1	CC/-
1	MAML3	4	141074514	T	7		1	0	-/T
1	MAB21L2	4	151503754	A	6		0	1	A/-
1	CBR4	4	169931327	A	14		0	1	AAAA/-
1	ANKH	5	14871810	A	8		0	1	A/-
1	NIPBL	5	36877201	C	7		1	0	-/C
1	PTGER4	5	40680317	A	8		0	1	A/-
1	C5orf44	5	64920562	A	10		1	0	-/AA
1	ANKRA2	5	72861349	T	8		0	1	T/-
1	ARSB	5	78281384	A	10		0	1	A/-
1	MEF2C	5	88178837	A	10		0	1	A/-
1	NR2F1	5	92919233	A	10		0	1	A/-
1	KIAA0825	5	93918259	T	9		0	1	T/-
1	TTC37	5	94884403	A	8		0	1	A/-
1	RFESD	5	94983346	T	11		0	1	T/-
1	IL4	5	132009541	T	6		0	1	T/-
1	MATR3	5	138643062	T	11		0	1	T/-
1	IGIP	5	139506060	A	7		0	1	A/-
1	NR3C1	5	142782890	A	7		0	1	A/-
1	GLRA1	5	151304199	A	6		0	1	A/-
1	C5orf54	5	159826788	A	14		0	1	A/-
1	GABRA1	5	161274216	G	8		1	0	-/G
1	CPEB4	5	173315766	A	7		0	1	A/-
1	CPEB4	5	173316671	A	8		0	1	A/-
1	RNF44	5	175959475	G	7		1	0	-/G
1	MGAT1	5	180235841	C	8		1	0	-/C
1	TRIM41	5	180650959	C	7		1	0	-/C
1	LYRM4	6	5260976	A	9		1	0	-/A
1	NRN1	6	6007300	T	10		0	1	T/-
1	NRN1	6	6007470	C	6		0	1	C/-
1	RNF182	6	13925590	A	7		0	1	A/-
1	JARID2	6	15246695	T	7		1	0	-/T
1	ATXN1	6	16761565	G	7		1	0	-/G
1	KAAG1	6	24357339	A	8		1	0	-/A
1	BTN3A1	6	26405755	C	6		0	1	C/-
1	PPP1R10	6	30584448	G	6		0	1	G/-
1	GPANK1	6	31632625	A	9		0	1	A/-
1	BRD2	6	32938782	G	7		0	1	G/-
1	ZBTB22	6	33284713	C	7		0	1	C/-
1	TCP11	6	35109157	C	8		1	0	-/C
1	KLC4	6	43027703	C	6		0	1	C/-
1	ABCC10	6	43399602	A	9		0	1	A/-
1	DDX43	6	74104340	G	7		0	1	G/-
1	DDX43	6	74104348	G	6		0	1	G/-
1	FAM46A	6	82462419	T	7		0	1	T/-
1	TPBG	6	83072997	G	7		1	0	-/G
1	TPBG	6	83074572	T	10		0	1	T/-
1	SNAP91	6	84418946	C	6		1	0	-/C
1	EPHA7	6	94129218	C	7		1	0	-/C
1	RTN4IP1	6	107077170	A	10		0	1	A/-
1	CDK19	6	111136404	C	6		1	0	-/C
1	MARCKS	6	114178613	T	7		1	0	-/T
1	CEP85L	6	118972877	G	6		0	1	ACTGCGGGGGGCGGGT/-
1	RNF146	6	127607277	T	7		0	1	T/-
1	CCR6	6	167525454	A	6		1	0	-/A
1	PHF14	7	11013771	G	6		0	1	G/-
1	MEOX2	7	15726118	T	10		1	0	-/TT
1	HOXA2	7	27142175	G	7		1	0	-/G
1	HOXA3	7	27166575	T	12		1	0	-/TT
1	ZNF107	7	64150896	A	7		0	1	A/-
1	AUTS2	7	69064296	T	9		0	1	T/-
1	BAZ1B	7	72936494	C	6		1	0	-/C
1	CD36	7	80267897	T	7		1	0	-/G
1	CD36	7	80267904	G	9		1	0	-/G
1	SEMA3E	7	83278220	A	7		0	1	AC/-
1	GATAD1	7	92076774	C	7		0	1	C/-
1	ASNS	7	97501155	G	6		1	0	-/G
1	ZAN	7	100331717	G	6		0	1	G/-
1	CAV1	7	116165024	C	6		0	1	C/-
1	C7orf58	7	120629613	A	6		0	1	A/-
1	PTPRZ1	7	121513468	A	8		1	0	-/A
1	SMARCD3	7	150945713	T	9		0	1	T/-
1	GALNTL5	7	151653582	A	8		1	0	-/A
1	MTUS1	8	17555043	A	7		0	1	A/-
1	CSGALNACT1	8	19459658	A	6		0	1	A/-
1	GNRH1	8	25281873	T	12		0	1	T/-
1	DPYSL2	8	26435534	T	8		1	0	-/TCTT
1	NRG1	8	31497393	G	6		0	1	G/-
1	NRG1	8	32579405	T	7		0	1	T/-
1	TTI2	8	33370396	A	20		0	1	AAAAAA/-
1	TACC1	8	38585786	A	19		0	1	AA/-
1	PLEKHA2	8	38758958	G	7		1	0	-/GG
1	DNAJC5B	8	66955796	G	7		0	1	G/-
1	SLCO5A1	8	70745296	G	7		1	0	-/GG
1	XKR9	8	71593234	T	7		1	0	-/T
1	EYA1	8	72268761	A	7		1	0	-/A
1	EYA1	8	72274391	T	25		0	1	TTTTTTTT/-
1	RALYL	8	85096581	A	11		0	1	A/-
1	MMP16	8	89339518	A	8		0	1	A/-
1	GRHL2	8	102504787	C	7		0	1	C/-
1	AZIN1	8	103870263	C	6		0	1	C/-
1	TRPS1	8	116680940	A	6		0	1	AG/-
1	EXT1	8	119123617	A	9	x	0	1	A/-
1	TNFRSF11B	8	119964377	A	8		0	1	A/-
1	MLLT3	9	20622295	C	8	x	0	1	C/-
1	ELAVL2	9	23825993	A	8		1	0	-/A
1	ELAVL2	9	23826023	A	6		0	1	A/-
1	IFNK	9	27524328	A	8		0	1	A/-
1	TMEM8B	9	35841698	C	6		0	1	C/-
1	PAX5	9	37034096	T	28	x	0	1	TTTTTTT/-
1	KLF9	9	73029521	A	7		1	0	-/A
1	CDK20	9	90589613	A	6		0	1	A/-
1	PTCH1	9	98278829	T	8		0	1	TT/-
1	NR4A3	9	102584619	C	7	x	0	1	C/-
1	ALAD	9	116163571	G	8		1	0	-/G
1	PAPPA	9	118916427	G	7		0	1	G/-
1	PTER	10	16526336	A	6		1	0	-/A
1	MLLT10	10	21823236	C	7	x	0	1	CCCT/-
1	ENKUR	10	25304904	T	6		1	0	-/T
1	C10orf71	10	50530449	A	11		0	1	A/-
1	EGR2	10	64575932	A	9		0	1	A/-
1	LRRTM3	10	68686020	T	10		0	1	T/-
1	CCAR1	10	70482243	T	8		1	0	-/T
1	SYNPO2L	10	75415799	C	7		1	0	-/C
1	COL17A1	10	105845579	T	9		0	1	T/-
1	VTI1A	10	114206802	G	6	x	0	1	G/-
1	TCF7L2	10	114710425	G	7	x	1	0	-/G
1	DCLRE1A	10	115613039	A	8		1	0	-/A
1	GFRA1	10	118031567	C	7		1	0	-/A
1	GFRA1	10	118031574	A	7		1	0	-/A
1	VAX1	10	118897597	A	9		0	1	A/-
1	CLRN3	10	129691077	A	7		1	0	-/A
1	IGF2	11	2159611	T	8		0	1	TG/-
1	IGF2	11	2159701	G	7		1	0	-/A
1	IGF2	11	2159934	G	7		0	1	G/-
1	EIF4G2	11	10830345	A	8		0	1	A/-
1	SOX6	11	16424308	A	8		0	1	A/-
1	LDHA	11	18416049	C	8		1	0	-/C
1	E2F8	11	19262331	T	9		0	1	T/-
1	BBOX1	11	27062766	A	7		1	0	-/A
1	BDNF	11	27743410	A	11		0	1	A/-
1	KCNA4	11	30038224	G	6		1	0	-/G
1	PDHX	11	34938068	G	6		0	1	GGGC/-
1	LRRC4C	11	40314545	C	7		1	0	-/C
1	LRRC4C	11	40314841	T	11		1	0	-/T
1	FAM89B	11	65339850	C	6		0	1	C/-
1	GDPD5	11	75236512	G	7		1	0	-/G
1	CCDC83	11	85566335	C	6		1	0	-/C
1	MED17	11	93517632	T	6		1	0	-/T
1	KDM4D	11	94730458	T	9		1	0	-/T
1	MAML2	11	96076219	A	9	x	0	1	A/-
1	BIRC3	11	102192600	T	9	x	1	0	-/T
1	GRIA4	11	105481598	T	19		0	1	TTTTT/-
1	C11orf57	11	111945046	C	6		0	1	C/-
1	CLMP	11	123065973	A	10		0	1	A/-
1	HYLS1	11	125761319	T	10		1	0	-/T
1	CLEC4D	12	8666271	A	8		0	1	A/-
1	LMO3	12	16759132	T	9		0	1	T/-
1	ST8SIA1	12	22487641	C	13		0	1	CC/-
1	ASUN	12	27091060	A	9		1	0	-/A
1	NELL2	12	45270050	C	7		1	0	-/C
1	POU6F1	12	51591599	G	7		0	1	G/-
1	ATF7	12	54020132	C	6		0	1	C/-
1	NAB2	12	57482881	G	7		0	1	G/-
1	LRP1	12	57522680	G	8		1	0	-/G
1	AVPR1A	12	63545580	G	6		0	1	G/-
1	LRRC10	12	70004882	T	6		0	1	T/-
1	PTPRR	12	71148201	C	6		0	1	C/-
1	PPP1R12A	12	80328745	G	7		0	1	G/-
1	DCN	12	91576698	T	8		0	1	T/-
1	CLLU1	12	92817741	A	8		0	1	A/-
1	USP44	12	95945186	C	6		0	1	C/-
1	ELK3	12	96588323	A	9		0	1	AA/-
1	CRY1	12	107486743	G	6		0	1	G/-
1	LHX5	12	113909830	A	8		0	1	A/-
1	TAOK3	12	118693433	T	8		1	0	-/T
1	CCDC60	12	119772651	T	6		0	1	T/-
1	FGF9	13	22245515	T	9		0	1	T/-
1	FGF9	13	22245928	T	8		1	0	-/TT
1	SACS	13	23985503	A	7		0	1	A/-
1	KATNAL1	13	30881150	T	9		1	0	-/TT
1	PDS5B	13	33160642	G	9		0	1	G/-
1	SERTM1	13	37269133	A	6		0	1	A/-
1	WDFY2	13	52158571	C	6		0	1	C/-
1	DACH1	13	72440983	A	6		0	1	A/-
1	SLITRK1	13	84455772	G	7		0	1	G/-
1	SLITRK1	13	84456232	C	6		1	0	-/C
1	DZIP1	13	96295498	T	9		0	1	T/-
1	ING1	13	111366381	G	7		1	0	-/G
1	ING1	13	111366440	G	6		0	1	G/-
1	SUPT16H	14	21852242	T	10		1	0	-/A
1	ACIN1	14	23540359	T	8		1	0	-/T
1	SLC7A8	14	23652347	A	21		1	0	-/AA
1	HOMEZ	14	23755271	C	8		1	0	-/C
1	NOVA1	14	27066714	T	22		0	1	TTTTTTT/-
1	ARF6	14	50360166	G	6		0	1	G/-
1	GNG2	14	52327081	G	6		1	0	-/G
1	TMEM229B	14	67953864	G	6		0	1	G/-
1	SLC8A3	14	70655134	G	6		0	1	G/-
1	ZFYVE1	14	73491336	A	6		0	1	A/-
1	GTF2A1	14	81686979	A	6		0	1	A/-
1	GPR68	14	91720203	C	8		1	0	-/C
1	ARHGAP11A	15	32907707	C	7		0	1	C/-
1	ACTC1	15	35087827	G	6		0	1	G/-
1	MEIS2	15	37391817	A	7		0	1	A/-
1	MEIS2	15	37392376	A	9		0	1	A/-
1	SPRED1	15	38545225	G	7		0	1	G/-
1	VPS18	15	41186710	T	7		0	1	T/-
1	TP53BP1	15	43802701	A	6		0	1	AC/-
1	CTDSPL2	15	44719688	T	7		1	0	-/T
1	MAP2K1	15	66679650	C	6	x	1	0	-/C
1	ISLR2	15	74422823	C	8		0	1	C/-
1	ODF3L1	15	76016453	G	7		0	1	G/-
1	HDGFRP3	15	83876223	C	7		1	0	-/C
1	SEMA4B	15	90728275	G	6		0	1	G/-
1	FURIN	15	91418964	C	7		0	1	C/-
1	RGMA	15	93616278	A	7		1	0	-/AGG
1	NR2F2	15	96869204	T	8		0	1	T/-
1	TTC23	15	99789532	A	6		1	0	-/A
1	SRRM2	16	2806346	C	8		0	1	C/-
1	SLX4	16	3659254	A	6		1	0	-/A
1	GRIN2A	16	10276052	G	6		0	1	G/-
1	SH2B1	16	28877046	T	6		0	1	T/-
1	ALDOA	16	30075603	A	8		0	1	A/-
1	ORAI3	16	30960598	C	10		0	1	C/-
1	SETD1A	16	30968751	A	7		0	1	A/-
1	KATNB1	16	57771076	G	8		0	1	GG/-
1	CDH8	16	62055351	T	8		1	0	-/T
1	WWP2	16	69959159	A	6		1	0	-/A
1	CHST5	16	75565240	A	10		0	1	A/-
1	CENPN	16	81040564	G	6		0	1	G/-
1	DBNDD1	16	90076465	T	8		0	1	T/-
1	TSR1	17	2240006	T	7		0	1	T/-
1	FGF11	17	7342785	G	9		0	1	G/-
1	ALDH3A1	17	19651701	A	9		0	1	A/-
1	PEX12	17	33905203	A	7		0	1	A/-
1	LHX1	17	35295298	C	7		0	1	C/-
1	KLHL10	17	39994124	C	6		0	1	C/-
1	RUNDC3A	17	42386160	G	7		0	1	G/-
1	ARHGAP27	17	43483368	G	6		0	1	G/-
1	NFE2L1	17	46128077	A	10		0	1	A/-
1	HLF	17	53342654	T	9	x	0	1	T/-
1	RGS9	17	63133513	G	6		0	1	G/-
1	ABCA10	17	67223311	T	6		0	1	T/-
1	UNC13D	17	73840732	G	7		0	1	G/-
1	MGAT5B	17	74868767	G	7		0	1	G/-
1	SEPT9	17	75315628	G	6		0	1	G/-
1	SLC26A11	17	78194788	C	7		1	0	-/C
1	TGIF1	18	3453844	T	6		0	1	T/-
1	ZFP161	18	5295930	T	9		0	1	T/-
1	KLHL14	18	30352670	C	6		1	0	-/C
1	CELF4	18	35145927	T	26		0	1	TTTT/-
1	CDH7	18	63430068	A	10		0	1	A/-
1	CBLN2	18	70211374	A	7		0	1	A/-
1	RASAL3	19	15575174	G	11		0	1	G/-
1	TSSK6	19	19626280	G	6		0	1	G/-
1	LGI4	19	35626002	C	8		1	0	-/C
1	TGFB1	19	41859538	T	7		1	0	-/T
1	FOSB	19	45971358	T	9		0	1	T/-
1	C19orf76	19	50192054	C	6		0	1	C/-
1	PPP2R1A	19	52693290	C	8	x	1	0	-/C
1	BIRC8	19	53794223	C	6		0	1	C/-
1	NLRP12	19	54311323	T	11		0	1	T/-
1	RBCK1	20	389370	C	7		1	0	-/C
1	ZNF343	20	2489765	A	8		1	0	-/A
1	PTPRA	20	2903864	A	9		1	0	-/A
1	PANK2	20	3870563	C	7		0	1	C/-
1	C20orf30	20	5093486	G	6		1	0	-/G
1	BMP2	20	6748929	G	7		1	0	-/G
1	DSTN	20	17550633	G	7		1	0	-/G
1	OVOL2	20	18038410	C	6		0	1	C/-
1	DLGAP4	20	35090855	C	7		0	1	C/-
1	UBE2V1	20	48729704	C	8		1	0	-/C
1	ZFP64	20	50808270	C	6		0	1	C/-
1	TSHZ2	20	51589486	A	14		0	1	A/-
1	DOK5	20	53092463	G	7		1	0	-/G
1	CASS4	20	54987179	T	7		0	1	T/-
1	ZBP1	20	56195624	A	9		0	1	A/-
1	DPH3P1	20	61476476	T	14		0	1	T/-
1	RWDD2B	21	30391672	A	15		0	1	AAA/-
1	IFNGR2	21	34775272	A	8		0	1	A/-
1	KCNJ6	21	39288612	A	10		0	1	A/-
1	CLDN5	22	19512393	G	6		1	0	-/G
1	ZNF280B	22	22843731	T	7		0	1	T/-
1	LRP5L	22	25757571	C	7		0	1	C/-
1	LRP5L	22	25757684	C	6		0	1	C/-
1	MN1	22	28197068	C	6	x	0	1	C/-
1	RBFOX2	22	36236338	C	6		0	1	C/-
1	TNRC6B	22	40574037	A	7		1	0	-/A
1	ATP5L2	22	43036329	C	6		0	1	C/-
1	GRPR	X	16141655	T	7		0	1	T/-
1	GRPR	X	16142062	A	8		0	1	A/-
1	KLHL15	X	24042977	G	6		0	1	G/-
1	DMD	X	32430191	A	8		0	1	A/-
1	DMD	X	33229458	A	8		0	1	A/-
1	CXorf59	X	36065140	T	6		0	1	T/-
1	LANCL3	X	37430873	G	7		0	1	G/-
1	DDX3X	X	41192982	A	8		1	0	-/A
1	KDM6A	X	44732756	G	7	x	0	1	G/-
1	FTSJ1	X	48334668	C	7		0	1	C/-
1	KCND1	X	48827408	G	7		0	1	G/-
1	GPR173	X	53105735	C	7		1	0	-/C
1	FOXR2	X	55650057	A	7		0	1	A/-
1	AR	X	66764195	C	6		1	0	-/C
1	CITED1	X	71526755	T	7		0	1	T/-
1	LPAR4	X	78010355	A	8		0	1	A/-
1	PABPC5	X	90689649	C	6		0	1	C/-
1	PCDH11X	X	91089715	T	10		0	1	T/-
1	PCDH19	X	99664185	G	7		0	1	G/-
1	ARMCX2	X	100913080	T	6		1	0	-/T
1	RAB40AL	X	102192228	G	6		0	1	G/-
1	TMEM164	X	109246783	G	6		0	1	G/-
1	SEPT6	X	118827189	G	6	x	0	1	G/-
1	CUL4B	X	119694638	G	8		0	1	G/-
1	ODZ1	X	124097630	A	7		1	0	-/A
1	FHL1	X	135251680	A	9		0	1	A/-
1	NSDHL	X	151999643	G	6		0	1	G/-
1	FLNA	X	153599632	G	7		1	0	-/G
1	DNASE1L1	X	153637543	A	8		0	1	A/-

## Sheet: Indel recurrence rate
Indel recurrence rate
Length distribtion of homopolymers
Homopolymer length	Exome	5’UTR	3’UTR
6 bp	23792	3580	33277
7 bp	4702	1011	13084
8 bp	915	326	4851
9 bp	187	163	2685
10 bp	44	109	1833
11 bp	16	59	1107
>11 bp	7	182	4105
Length distribtion of homopolymers affected by indels
Affected Homopolymer length	Exome	5’UTR	3’UTR
6 bp	867	125	1088
7 bp	771	132	1595
8 bp	410	124	1714
9 bp	136	90	1666
10 bp	40	85	1440
11 bp	13	52	949
>11 bp	7	161	3456
Length distribtion of recurrently affected homopolymers, stratified by recurrent rate
recurrence	5’UTR									Exonic								3’UTR
in >n/16:		2	3	4	5	6	7	8		2	3	4	5	6	7	8		2	3	4	5	6	7	8
6 bp		8	1	1	1	0	0	0		51	4	1	0	0	0	0		17	8	64	4	2	0	0
7 bp		15	2	0	0	0	0	0		126	23	5	2	0	0	0		44	9	236	2	0	0	0
8 bp		49	16	5	1	1	0	0		160	60	24	14	7	3	2		154	58	552	26	7	1	0
9 bp		46	23	11	7	3	2	2		89	47	21	14	5	2	2		445	205	898	97	37	15	6
10 bp		62	45	30	15	7	3	3		33	25	17	12	9	4	1		788	530	1094	322	174	88	43
11 bp		41	36	30	22	17	14	9		13	12	12	11	10	6	4		734	642	844	532	423	317	229
>11 bp		137	118	94	77	52	38	28		5	3	3	3	3	3	1		2514	2110	2951	1705	1334	972	703
