# Supplementary material for: Mismatch repair deficiency endows tumors with a unique mutation signature and sensitivity to DNA double-strand breaks
Source: eLife. 2014 Aug 1;3:e02725. doi: 10.7554/eLife.02725 (PMC4141275; doi:10.7554/eLife.02725)
Supplement: Figure 5—source data 1. — DOI: http://dx.doi.org/10.7554/eLife.02725.029 [file elife02725s007.xlsx]

## Sheet: Markers in MSI panel
Recurrent indels selected for the 59-marker MSI panel
Marker Nr.	Gene	Region	Chr	Position	Homopolymer content	Homopolymer length
1	SETD1B	Exonic	12	122242658	C	8
2	PHF2	Exonic	9	96422612	A	8
3	SEC31A	Exonic	4	83785565	T	9
4	TMEM60	Exonic	7	77423460	T	9
5	TTK	Exonic	6	80751897	A	9
6	MSH6	Exonic	2	48030640	C	8
7	MBD4	Exonic	3	129155548	T	10
8	MRE11	Exonic	11	94212931	A	11
9	TGFBR2	Exonic	3	30691872	A	10
10	BDNF	UTR5	11	27741185	A	10
11	DIDO1	UTR3	20	61536692	A	11
12	UBE2Z	UTR3	17	47005702	A	11
13	RYR3	UTR3	15	34157542	A	10
14	TMEM65	UTR3	8	125325218	A	11
15	BTBD7	UTR3	14	93708031	A	10
16	CCND1	UTR3	11	69466274	A	10
17	HDAC4	UTR3	2	239974110	A	9
18	HUS1B	UTR3	6	656080	A	10
19	LRCH1	UTR3	13	47325658	A	10
20	MKLN1	UTR3	7	131175981	A	10
21	KDM5A	UTR3	12	389524	T	11
22	TSR2	UTR3	X	54471046	T	10
23	ARL10	UTR3	5	175800427	T	10
24	CCDC89	UTR3	11	85395560	T	10
25	EDEM1	UTR3	3	5260541	T	10
26	FOXN2	UTR3	2	48603080	T	10
27	RYBP	UTR3	3	72424550	T	9
28	ABAT	UTR3	16	8876793	T	11
29	ARFIP1	UTR3	4	153832103	T	11
30	C15orf2	UTR3	15	24927892	A	10
31	ENTPD4	UTR3	8	23289681	A	11
32	LANCL1	UTR3	2	211297866	T	9
33	PPM1A	UTR3	14	60761434	T	10
34	PURB	UTR3	7	44920831	A	9
35	ST7L	UTR3	1	113067471	A	10
36	SULF2	UTR3	20	46286321	A	10
37	TMC7	UTR3	16	19073948	A	10
38	UBA6	UTR3	4	68481878	T	12
39	USP14	UTR3	18	212030	A	9
40	WHSC1L1	UTR3	8	38175280	A	11
41	ZNF185	UTR3	X	152140996	C	10
42	ZNF287	UTR3	17	16454420	T	9
43	SLAIN2	UTR3	4	48428164	T	11
44	2014-03-01	UTR3	4	164446861	T	9
45	NAALAD2	UTR3	11	89925063	T	10
46	NPR3	UTR3	5	32786466	T	11
47	PCDHB3	UTR3	5	140482944	T	10
48	PCGF5	UTR3	10	93043933	T	11
49	POLH	UTR3	6	43586699	G	10
50	RIMKLB	UTR3	12	8926681	T	11
51	SPCS3	UTR3	4	177250202	T	10
52	ARHGAP18	UTR3	6	129898732	A	11
53	BOD1L	UTR3	4	13570454	A	11
54	KCNK1	UTR3	1	233807668	A	11
55	FCHSD2	UTR3	11	72549650	A	10
56	MTDH	UTR3	8	98740105	A	10
57	TBC1D1	UTR3	4	38140082	A	10
58	TMEM14B	UTR3	6	10756864	A	11
59	UGT2B28	UTR3	4	70160633	A	11

## Sheet: Clinical variables
Logistic regression analysis to detect difference between MSI-H and MSI-L/MSS tumors
	All tumors (%)	MSI-H (%)	MSI-L/MSS (%)	P-value
Stage
Stage I	75 (66)	22 (61)	53 (68)	0.79
Stage II	13 (11)	5 (14)	8 (10)
Stage III	15 (13)	6 (17)	9 (12)
Stage IV	11 (10)	3 (8)	8 (10)
Grade
Grade 1	30 (26)	10 (28)	20 (26)	0.26
Grade 2	20 (18)	9 (25)	11 (14)
Grade 3	62 (54	16 (44)	46 (59)
No Grade	2 (2)	1 (3)	1 (1)
Histology
Endometrioid	75 (66)	30 (83)	46 (59)
Serous	12 (11)	1 (3)	11 (14)	0.03
Other	27 (24)	5 (14)	21 (27)
