# Supplementary material for: Mismatch repair deficiency endows tumors with a unique mutation signature and sensitivity to DNA double-strand breaks
Source: eLife. 2014 Aug 1;3:e02725. doi: 10.7554/eLife.02725 (PMC4141275; doi:10.7554/eLife.02725)
Supplement: Figure 5—source data 2. — DOI: http://dx.doi.org/10.7554/eLife.02725.030 [file elife02725s008.xlsx]

## Sheet: Clinical info
Clinical information for ovairan tumors and leukemias
Tumor	Type	Histo-pathology	Grade	Stage
MMR- Ovarian 1	Ovary	Serous	3	IIIc
MMR+ Ovarian 1	Ovary	Clear cell	3	IIc
MMR+ Ovarian 2	Ovary	Clear cell	3	IIIc
DND41 (MMR- Leukemia 1)	Blood; Cell line	Acute lymphoblastic leukemia	/	/
CCRF-CEM (MMR- Leukemia 2)	Blood; Cell line	Acute lymphoblastic leukemia	/	/
SUPT1 (MMR- Leukemia 3)	Blood; Cell line	Acute lymphoblastic leukemia	/	/
RPMI8402 (MMR+ Leukemia 1)	Blood; Cell line	Acute lymphoblastic leukemia	/	/

## Sheet: sequencing statistics
Sequencing statistics
Whole -genome sequencing for two ovarian MSS tumors and their matched normals
	MMR+ Ovarian 1 Tumor	MMR+ Ovarian 1 Normal	MMR+ Ovarian 2 Tumor	MMR+ Ovarian 2 Normal
Technology used	CG	CG	CG	CG
Reference genome	hg18	hg18	hg18	hg18
Bases mapped (Gb)	171.5	247.2	190.6	171
% called bases	0.921	0.931	0.914	0.909
Haploid coverage	61.3x	88.3x	68.1x	61.1x
Number of substitutions	3062548	3156112	3037317	3053067
Number of indels	317302	352356	315285	311269
Exome-sequencing for one ovarianMSI-H tumor-normal pair, 3 MSI-H leukemias and 1 MSS leukemia
	MMR- Ovarian 1 Tumor	MMR- Ovarian 1 Normal	MMR- Leukemia 1 Tumor	MMR- Leukemia 2 Tumor	MMR- Leukemia 3 Tumor	MMR+ Leukemia 1 Tumor
Capture	TruSeq	TruSeq	Nimblegen	Nimblegen	Nimblegen	Nimblegen
Number of reads	44200000	84300000	212000000	199000000	211000000	225000000
Percent on target	0.55	0.509	0.793	0.788	0.472	0.752
Exome covered	0.919	0.953	0.973	0.972	0.974	0.972
Mean target coverage	26.6	45.9	179.5	169.3	102.8	181.3
Number of substitutions	50766	52113	32527	34372	40420	31278
Number of indels	29513	35774	27412	33547	133140	25396

## Sheet: Mutation status for MMR genes
Mutation status for MMR genes
Tumor	Mutation status of MMR genes
MMR- Ovarian 1	MSH6:T1085fs
MMR+ Ovarian 1	/
MMR+ Ovarian 2	/
DND41 (MMR- Leukemia 1)	MSH6:T1085fs; MSH3: K381fs
CCRF-CEM (MMR- Leukemia 2)	MLH1: R100X
SUPT1 (MMR- Leukemia 3)	MLH1: T495fs; MSH3: K381fs
RPMI-8402 (MMR+ Leukemia 1)	/

## Sheet: Somatic mutations
Number of somatic mutations in MMR-deficient ovarian tumor and leukemias
Ovarian tumors
Tumor	Substitutions (confirmed)	Indels (confirmed)	Mutations (confirmed)
MMR- Ovarian 1	2045	280	2325
MMR+ Ovarian 1	32 (16)	12 (0)	44 (16)
MMR+ Ovarian 2	42 (20)	18 (0)	60 (20)
Leukemias
Cell line ID	Tumor	Substitutions	Indels	Mutations
DND41	MMR- Leukemia 1	5123	692	5815
CCRF-CEM	MMR- Leukemia 2	5789	698	6487
SUPT1	MMR- Leukemia 3	6021	976	6997
RPMI8402	MMR+ Leukemia 1	3602	247	3849
