# Supplementary material for: Mismatch repair deficiency endows tumors with a unique mutation signature and sensitivity to DNA double-strand breaks
Source: eLife journal article supplement (doi:10.7554/elife.02725), 2014-08-01
Supplement: supp [file elife-02725-supp-v1.zip]

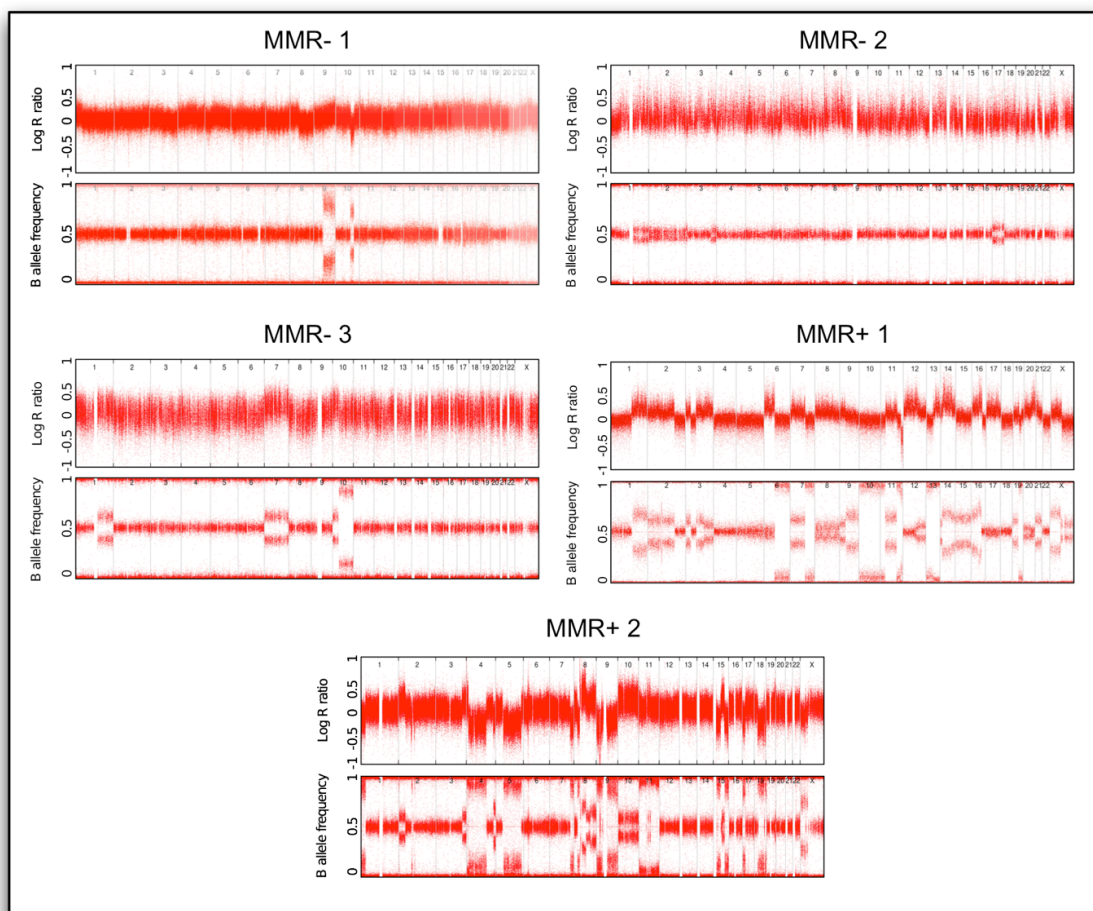

Figure 1 – figure supplement 3: Copy number status of the 5 whole-genomes assessed by Illumina Human-Omni1 and CytoSNP-12 chips.
