# Supplementary material for: Mismatch repair deficiency endows tumors with a unique mutation signature and sensitivity to DNA double-strand breaks
Source: eLife journal article supplement (doi:10.7554/elife.02725), 2014-08-01
Supplement: supp [file elife-02725-supp-v1.zip]

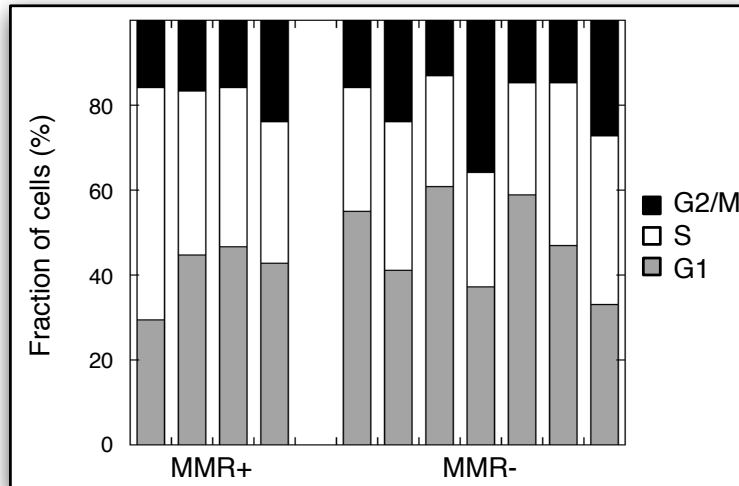

Figure 6 – figure supplement 1: Cell cycle distribution in untreated MMR-deficient and MMR-proficient cell cultures. No difference was observed in G1, S or G2/M phase frequency between 7 MMR-deficient and 4 MMR-proficient cultures ( $P=0.45$ , 0.30 or 0.94).
