# Supplementary material for: Mismatch repair deficiency endows tumors with a unique mutation signature and sensitivity to DNA double-strand breaks
Source: eLife journal article supplement (doi:10.7554/elife.02725), 2014-08-01
Supplement: supp [file elife-02725-supp-v1.zip]

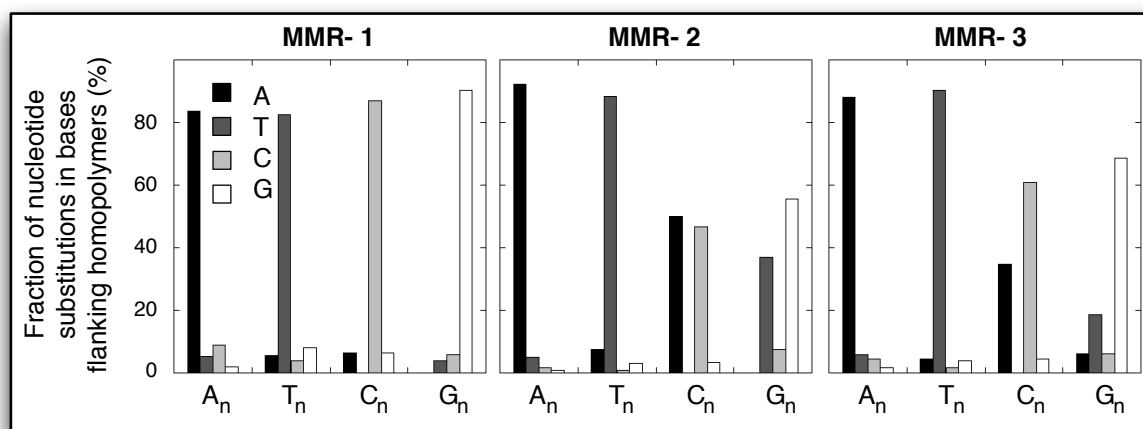

Figure 2 – figure supplement 4: Effect of homopolymer nucleotide composition (A<sub>n</sub>, T<sub>n</sub>, C<sub>n</sub> or G<sub>n</sub>) on substitutions immediately flanking a homopolymer in the individual MMR-deficient genomes. The slight increase in A substitutions next to C<sub>n</sub> homopolymers and T substitutions near G<sub>n</sub> homopolymers is exclusively caused by C:G>T:A transitions in a CpG context, indicating they are likely deaminations of methylated cytosines.
