# Supplementary material for: Mismatch repair deficiency endows tumors with a unique mutation signature and sensitivity to DNA double-strand breaks
Source: eLife journal article supplement (doi:10.7554/elife.02725), 2014-08-01
Supplement: supp [file elife-02725-supp-v1.zip]

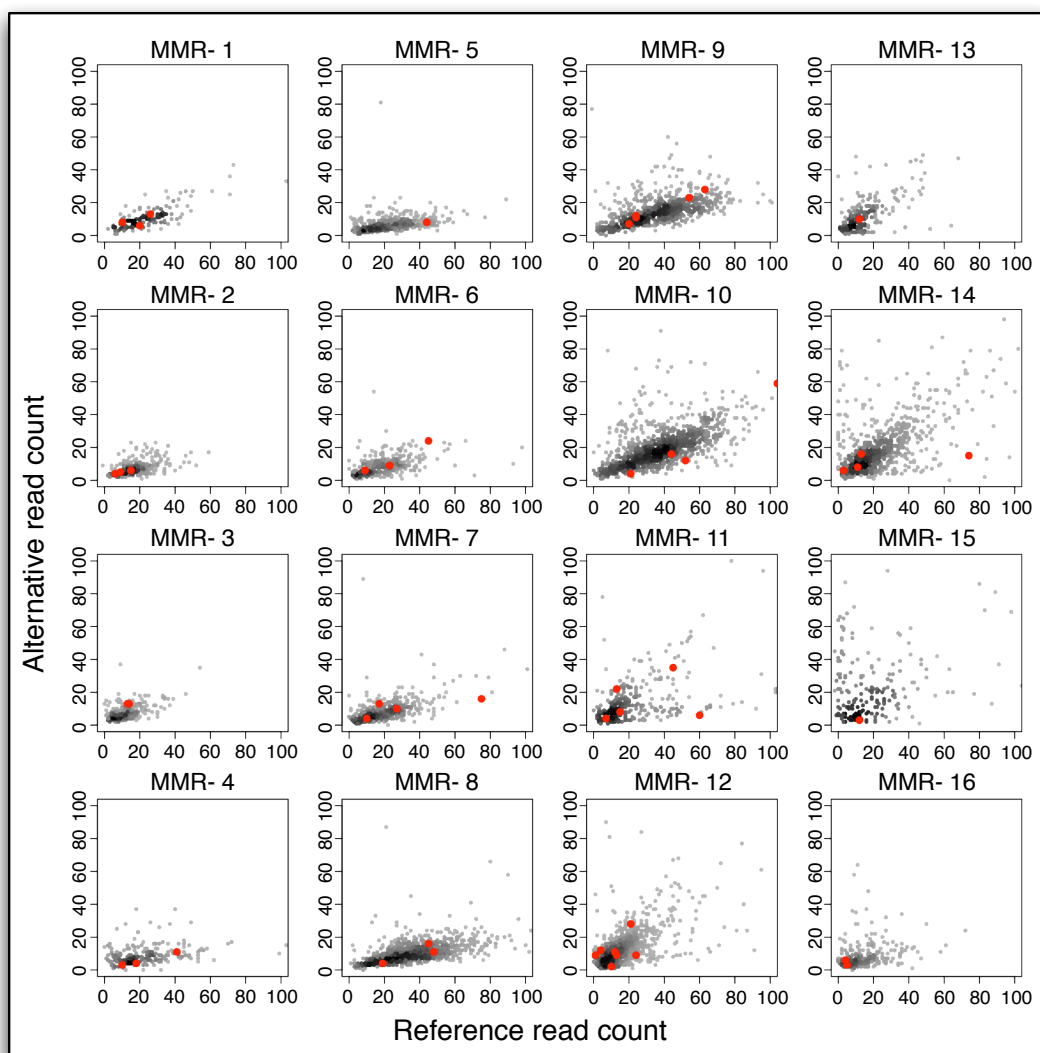

Table 2 – figure supplement 1: Allelic frequency for indels in the MMR-deficient samples. Reference and alternative read counts were plotted for all somatic indels detected. The indels found in genes involved in *DSBR by HR* pathway (see Supplementary Table S9) were overplotted in red. The vast majority of these indels are present in the major tumor clone.
