# Supplementary material for: Mismatch repair deficiency endows tumors with a unique mutation signature and sensitivity to DNA double-strand breaks
Source: eLife journal article supplement (doi:10.7554/elife.02725), 2014-08-01
Supplement: supp [file elife-02725-supp-v1.zip]

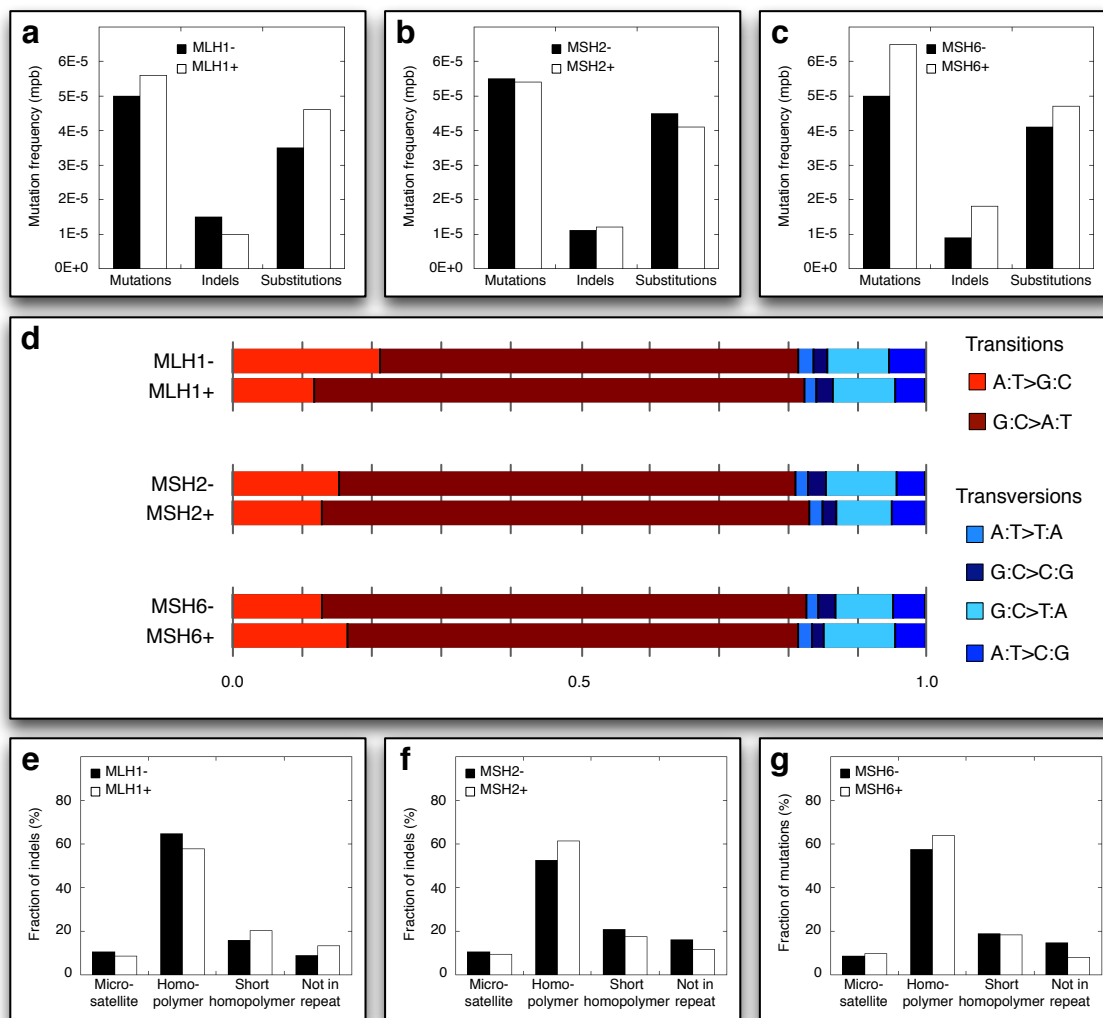

Figure 4 – figure supplement 5: Mutation patterns obtained from MLH1-deficient, MSH2-deficient and MSH6-deficient exomes. (a-c) Mutation frequencies. (d) Somatic substitution patterns. (e-g) Indel compositions. No obvious difference is observed.
