# Supplementary material for: Mismatch repair deficiency endows tumors with a unique mutation signature and sensitivity to DNA double-strand breaks
Source: eLife journal article supplement (doi:10.7554/elife.02725), 2014-08-01
Supplement: supp [file elife-02725-supp-v1.zip]

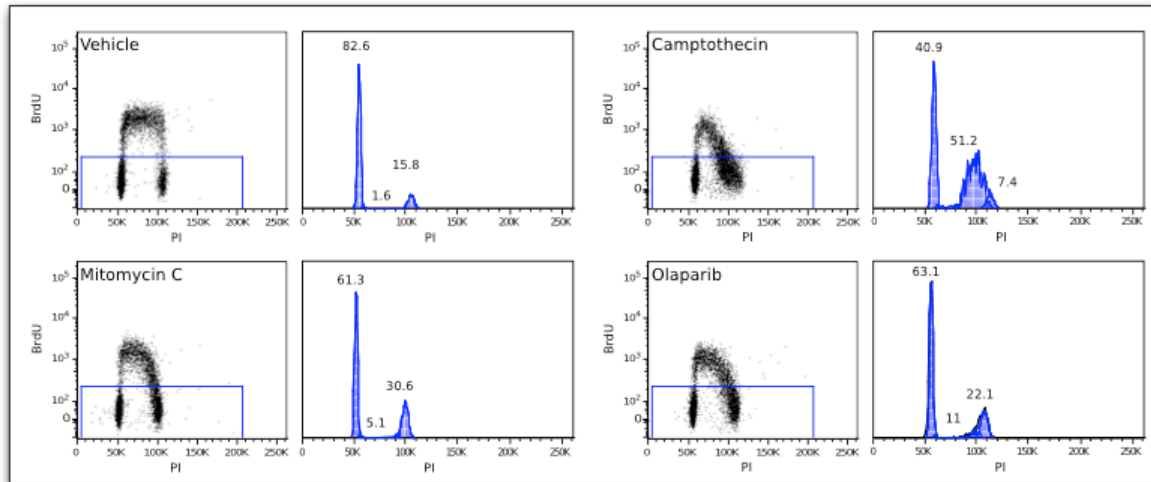

Figure 6 – figure supplement 3: Example of a 2 hour BrdU pulse-labeled MMR-deficient cell culture, demonstrating S-phase stalling and G2/M stalling upon mitomycin C exposure, S-phase stalling upon camptothecin exposure and S-phase stalling and G2/M stalling upon olaparib exposure. Cell cycle phases in unlabeled (stalled) fractions were determined as described by Watson *et al.*
