# Supplementary material for: Mismatch repair deficiency endows tumors with a unique mutation signature and sensitivity to DNA double-strand breaks
Source: eLife journal article supplement (doi:10.7554/elife.02725), 2014-08-01
Supplement: supp [file elife-02725-supp-v1.zip]

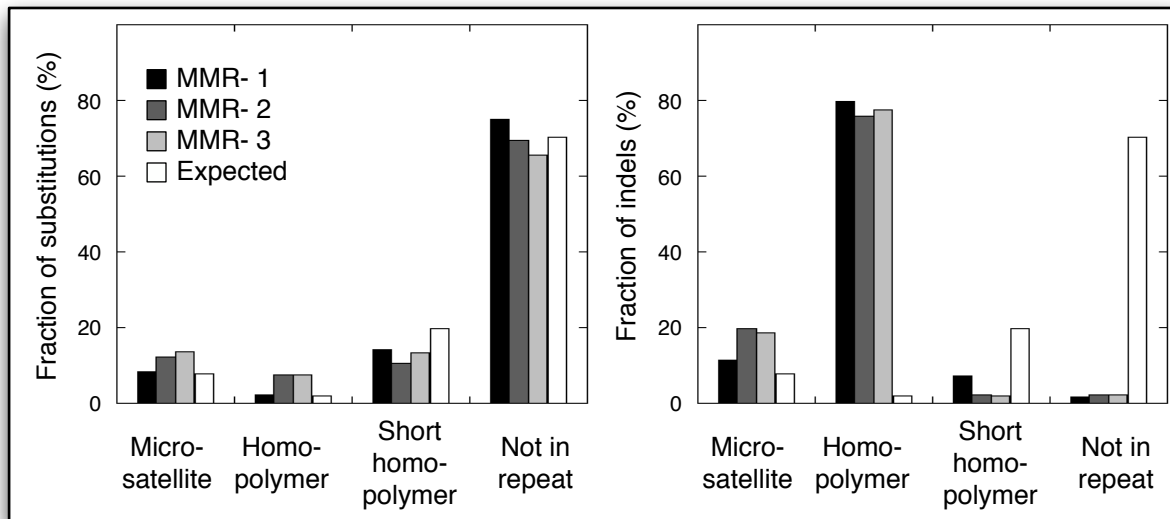

Figure 1 – figure supplement 1: The fraction of indels (left panel) and substitutions (right panel) observed in microsatellites, homopolymers, short homopolymers and in non-repeat regions compared to their expected fraction in these regions. Data are shown for the individual MMR-deficient tumors. In all 3 tumors, substitutions predominantly affected non-repeat regions, while indels were mainly confined to homopolymers.
