# Supplementary material for: Mismatch repair deficiency endows tumors with a unique mutation signature and sensitivity to DNA double-strand breaks
Source: eLife journal article supplement (doi:10.7554/elife.02725), 2014-08-01
Supplement: supp [file elife-02725-supp-v1.zip]

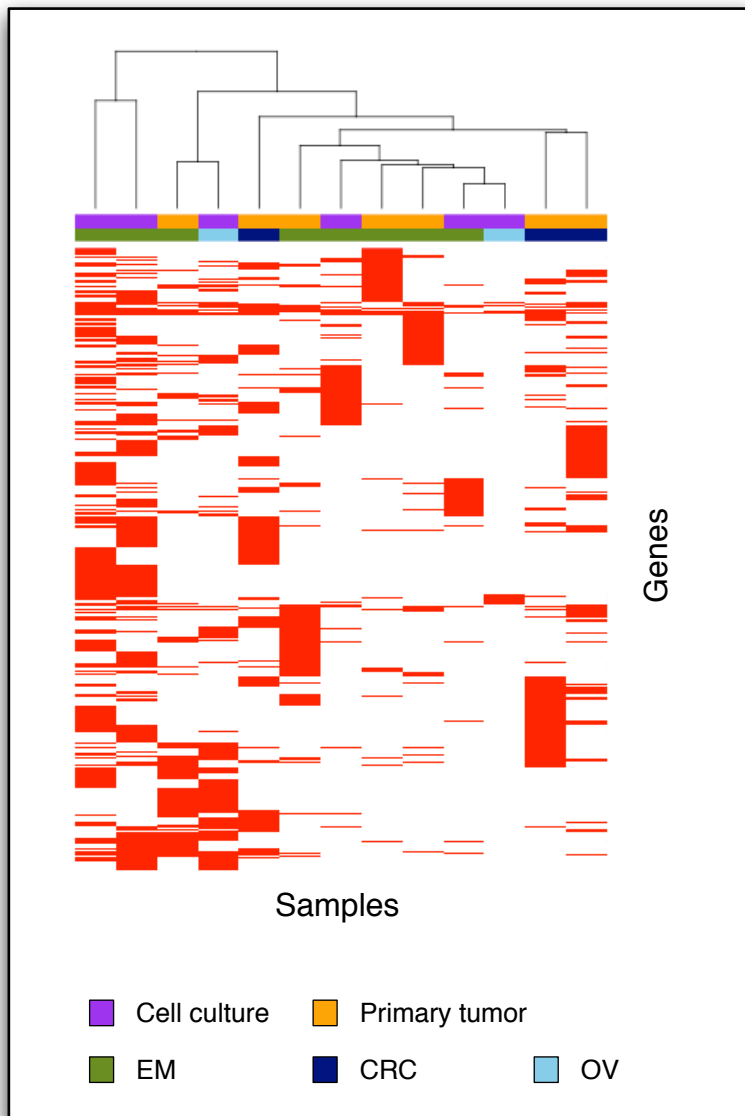

Figure 4 – figure supplement 1: Clustering analysis of 13 MMR-deficient exomes for the genes affected by either a somatic substitution or indel in the coding regions. No obvious subgroups in terms of cancer of origin or between primary tumors and cell cultures was observed.
