# Supplementary material for: Mismatch repair deficiency endows tumors with a unique mutation signature and sensitivity to DNA double-strand breaks
Source: eLife journal article supplement (doi:10.7554/elife.02725), 2014-08-01
Supplement: supp [file elife-02725-supp-v1.zip]

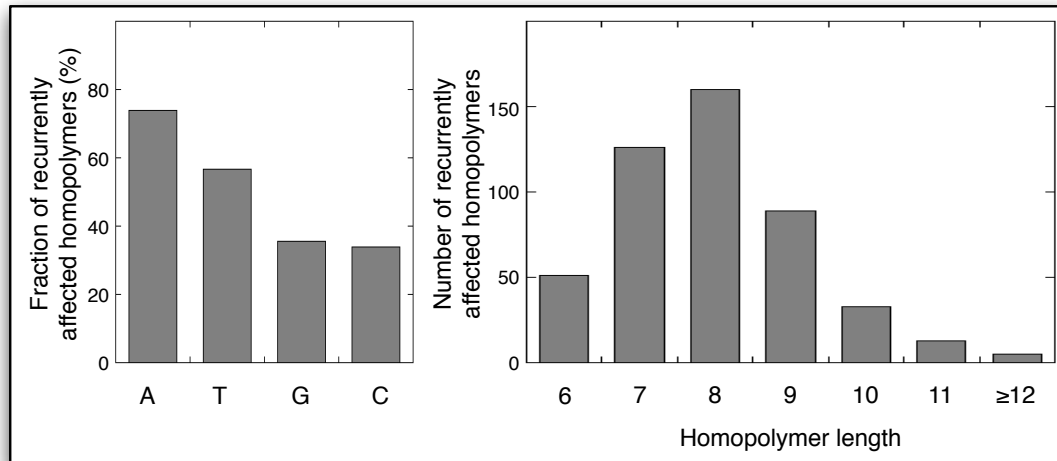

Figure 4 – figure supplement 3: Characteristics of the exonic homopolymers recurrently affected. For the 477 homopolymers affected in at least 2 out of 16 tumors, respectively 176, 135, 85 and 81 consisted of A, T, G or C stretches. Out of the 34 homopolymers affected in at least 6 out of 16 tumors, 15, 15, 1 and 3 consisted of A, T, G or C stretches, respectively. The length of recurrently affected homopolymers (in at least 2 out of 16 tumors) varied from 6 nucleotides to 25 nucleotides, but recurrence was biased towards homopolymers with length 7-9 nucleotides.
