# Supplementary material for: Mismatch repair deficiency endows tumors with a unique mutation signature and sensitivity to DNA double-strand breaks
Source: eLife journal article supplement (doi:10.7554/elife.02725), 2014-08-01
Supplement: supp [file elife-02725-supp-v1.zip]

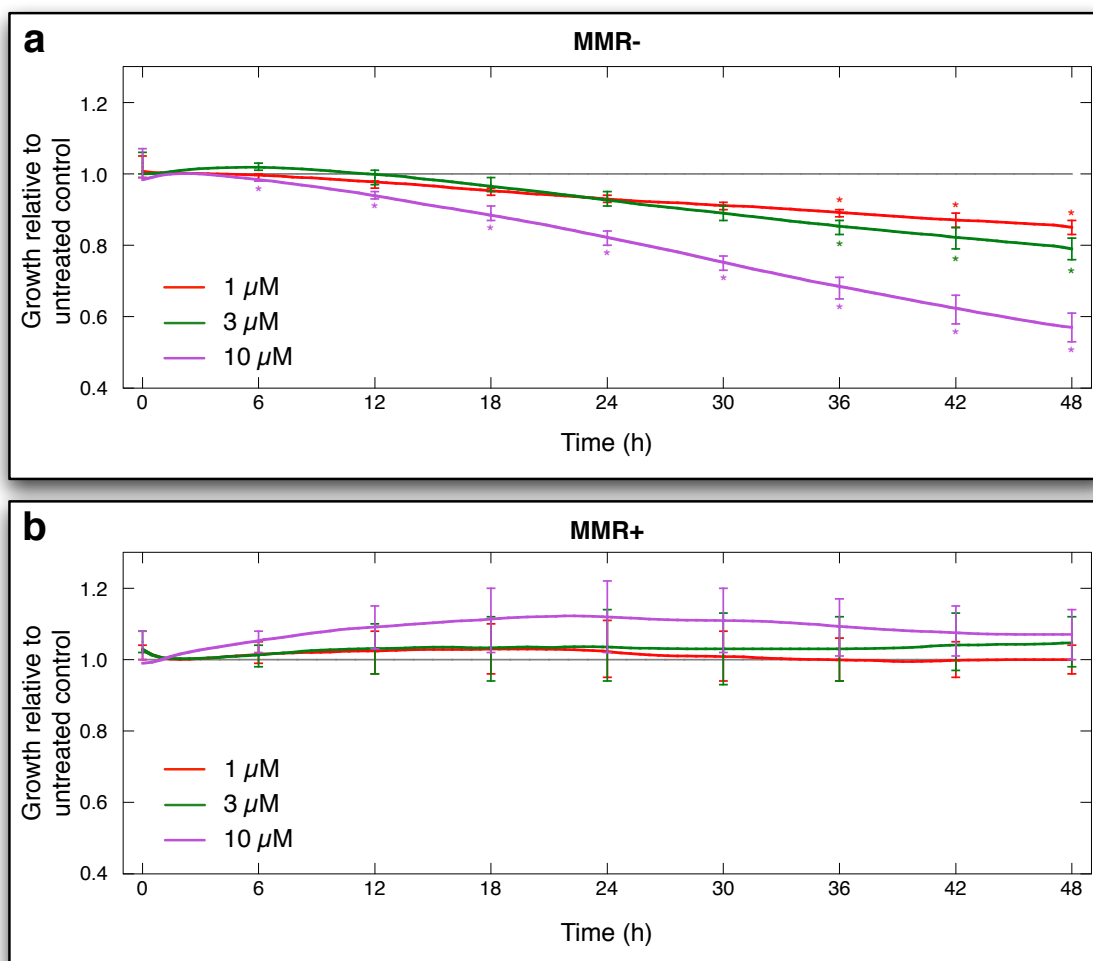

Figure 7 – figure supplement 1: Cell proliferation of MMR-deficient cultures was measured in real-time using the xCELLigence RTCA DP system (for up to 48 hours after treatment). Values are normalized to the vehicle-treated control. Error bars represent SEM. The average cell proliferation of 7 MMR-deficient cells (a) and 4 MMR-proficient cells (b) with increasing concentrations of olaparib (1 μM, 3 μM, 10 μM) is shown. Overall, MMR-deficient cultures were characterized by a dose-dependent decrease in proliferation, whereas MMR-proficient cells did not respond to olaparib.
