# Supplementary material for: Mismatch repair deficiency endows tumors with a unique mutation signature and sensitivity to DNA double-strand breaks
Source: eLife journal article supplement (doi:10.7554/elife.02725), 2014-08-01
Supplement: supp [file elife-02725-supp-v1.zip]

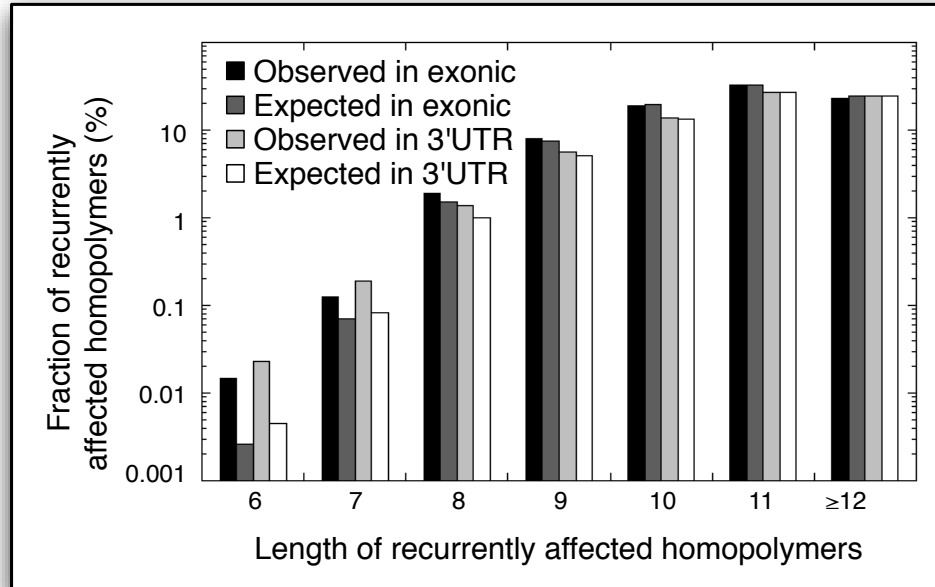

Figure 4 – figure supplement 4: The observed and expected frequencies of indels recurrently affected in homopolymers (in at least 2 out of 16 tumors) stratified for homopolymer length and for those affecting coding exonic regions and the 3'UTR. The difference between observed and expected recurrent indels is high for short homopolymers, but non-existent for long homopolymers.
