# Supplementary material for: Mismatch repair deficiency endows tumors with a unique mutation signature and sensitivity to DNA double-strand breaks
Source: eLife journal article supplement (doi:10.7554/elife.02725), 2014-08-01
Supplement: supp [file elife-02725-supp-v1.zip]

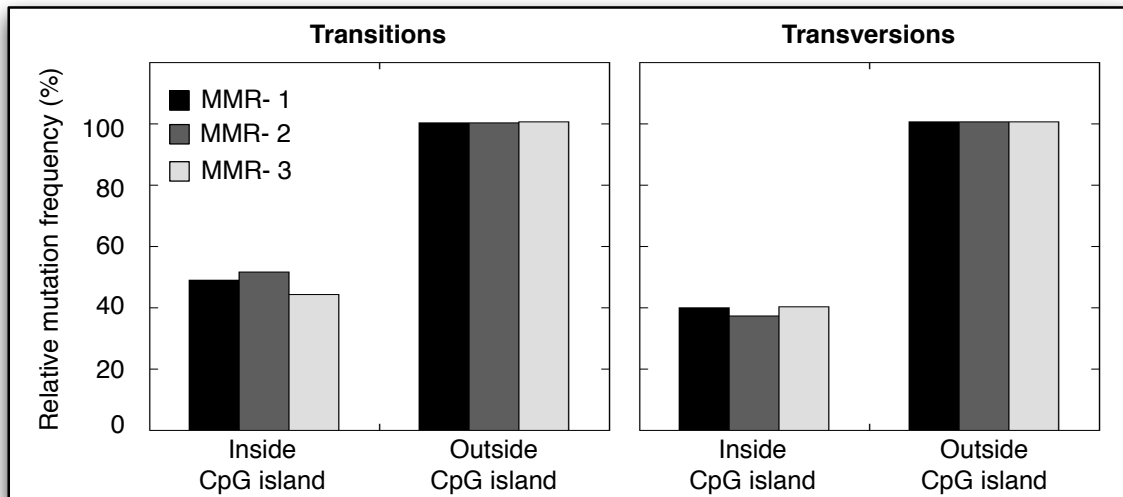

Figure 2 – figure supplement 5: Frequency of transitions and transversions in and outside of CpG Islands in the individual MMR-deficient genomes. The frequency of transitions and transversions inside and outside CpG islands were determined as the number of mutations divided by the total size of each of the features, and expressed relative to the general, genome-wide frequencies of transitions and transversions. Individual genomes display similar patterns.
