# Supplementary material for: Mismatch repair deficiency endows tumors with a unique mutation signature and sensitivity to DNA double-strand breaks
Source: eLife journal article supplement (doi:10.7554/elife.02725), 2014-08-01
Supplement: supp [file elife-02725-supp-v1.zip]

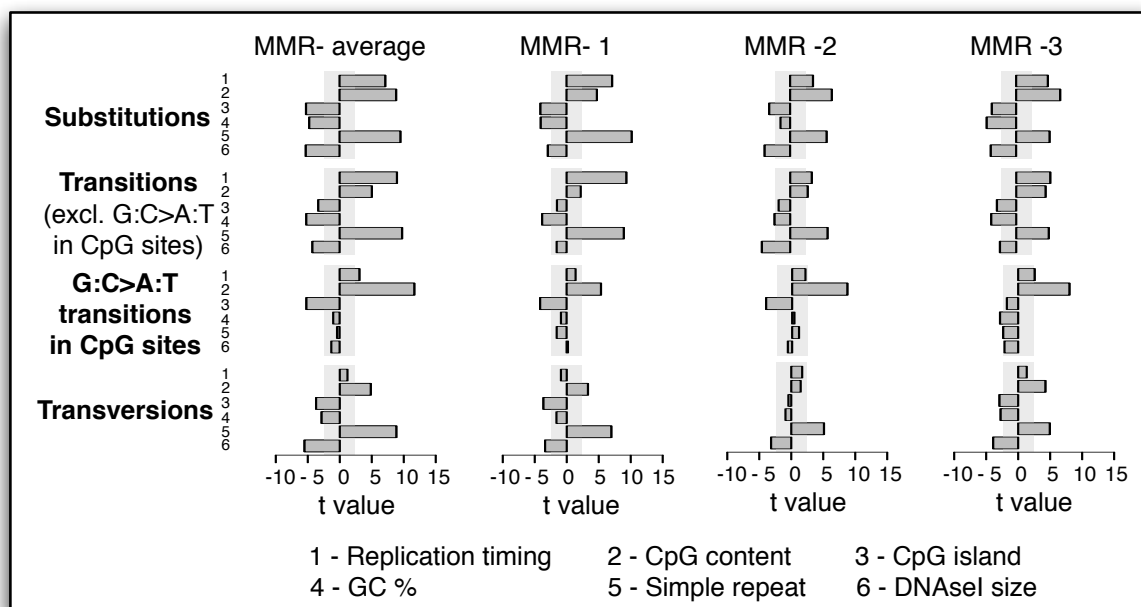

Figure 2 – figure supplement 2: Multivariate linear regression modeling of genome features predicting substitutions frequencies per 1Mb window in the individual MMR-deficient genomes. T-values resulting from the linear model are displayed for each genome feature in the bar plots and indicate significance (shaded grey box equals  $P > 0.05$ , Bonferroni-corrected per model) and direction of the correlation. High concordance between the individual tumors is observed.
