# Supplementary material for: Mismatch repair deficiency endows tumors with a unique mutation signature and sensitivity to DNA double-strand breaks
Source: eLife journal article supplement (doi:10.7554/elife.02725), 2014-08-01
Supplement: supp [file elife_poa_e02725_Table_2_source_data_1.xlsx]

## Sheet: IPA
Top enriched pathways detected using IPA
input data:	genes affected by somatic exonic indels or indels in exon/intron boundaries (4,116 genes).
Rank	Pathway	FDR
1	Role of BRCA1 in DNA Damage Response	0.0026
	Hereditary Breast Cancer Signaling	0.0026
	Ovarian Cancer Signaling	0.0026
4	Role of NFAT in Cardiac Hypertrophy	0.0079
	Calcium Signaling	0.0079
	PPARα/RXRα Activation	0.0079
	Epithelial Adherens Junction Signaling	0.0079
8	Caveolar-mediated Endocytosis Signaling	0.0083
9	Telomerase Signaling	0.0095
10	Endothelin-1 Signaling	0.014
	Paxillin Signaling	0.014
	Protein Kinase A Signaling	0.014
	Glioblastoma Multiforme Signaling	0.014
14	Phospholipase C Signaling	0.016
15	VEGF Signaling	0.02
	PPAR Signaling	0.02
17	Cellular Effects of Sildenafil (Viagra)	0.022
	PI3K Signaling in B Lymphocytes	0.022
19	Cell Cycle: G2/M DNA Damage Checkpoint Regulation	0.023
20	Integrin Signaling	0.026
input data:	genes affected by somatic exonic indels or indels in exon/intron boundaries in at least two samples (1,496 genes).
Rank	Pathway	FDR
1	DNA Double-Strand Break Repair by Homologous Recombination	0.0047
	Ovarian Cancer Signaling	0.0047
3	Role of NFAT in Cardiac Hypertrophy	0.0068
4	Cell Cycle: G2/M DNA Damage Checkpoint Regulation	0.013
5	PPARα/RXRα Activation	0.014
	Cardiac Hypertrophy Signaling	0.014
7	Nitric Oxide Signaling in the Cardiovascular System	0.016
8	CREB Signaling in Neurons	0.047

## Sheet: GenomeMuSIC
Top enriched pathways detected using GenomeMuSiC
input data:	all somatic exonic indels and indels in exon/intron boundaries (7,546 indels)
Databases:	BioCarta
	Reactome
Rank	Pathway	Database	FDR
1	ATR/BRCA pathway	BioCarta	1e-16
2	DNA repair	Reactome	2.5e-11
3	ATM pathway	BioCarta	5.9e-11
4	Double strand break repair	Reactome	7.2e-08
	G2 pathway	BioCarta	7.2e-08
6	Homologous recombination repair	Reactome	1.9e-07
7	G2/M checkpoints	Reactome	2.3e-07
8	IL10 pathway	BioCarta	2.2e-05
	CARM1 and regulation of the Estrogen Receptor pathway	BioCarta	2.2e-05
10	Cell cycle checkpoints	Reactome	4.5e-05
11	Downstream TCR signaling	Reactome	9.8e-05
12	Glucuronidation	Reactome	0.00013
13	Activation of ATR in response to replication stress	Reactome	0.00023
14	Removal of DNA patch containing abasic residue	Reactome	0.0016
	P53 Hypoxia pathway	BioCarta	0.0016
16	NEF mediated down modulation of cell surface receptors by recruiting them to clathrin adapters	Reactome	0.0026
17	Cell cycle mitotic	Reactome	0.0026
18	Base free sugar phosphate removal via the single nucleotide replacement pathway	Reactome	0.0027
	IL22BP pathway	BioCarta	0.0027
20	Extension of telomeres	Reactome	0.0044
input data:	all somatic exonic indels and indels in exon/intron boundaries (7,546 indels)
Databases:	BioCarta
	Reactome
	Cerbinskaite et al
	Kasparek et al
	DNA repair Database (https://dnapittcrew.upmc.com)
Rank	Pathway	Database	FDR
1	ATR/BRCA pathway	BioCarta	1e-16
2	Homologous recombination pathway	Kasparek et al	6.3e-15
3	Homologous recombination pathway	Cerbinskaite et al	3.6e-12
4	DNA repair	Reactome	2.5e-11
5	ATM pathway	BioCarta	5.9e-11
6	Double strand break repair	Reactome	7.2e-08
	G2 pathway	BioCarta	7.2e-08
8	Homologous recombination repair	Reactome	1.9e-07
9	G2/M checkpoints	Reactome	2.3e-07
10	IL10 pathway	BioCarta	2.2e-05
	CARM1 and regulation of the Estrogen Receptor pathway	BioCarta	2.2e-05
12	Cell cycle checkpoint	Reactome	4.5e-05
13	Downstream TCR signaling	Reactome	9.8e-05
14	Glucuronidation	Reactome	0.00013
	Homologous recombination pathway	DNA Repair Database	0.00013
16	Activation of ATR in response to replication stress	Reactome	0.00023
17	Removal of DNA patch containing abasic residue	Reactome	0.0016
	P53 hypoxia pathway	BioCarta	0.0016
19	NEF mediated down modulation of cell surface receptors by recruiting them to clathrin adapters	Reactome	0.0026
20	Cycle mitotic	Reactome	0.0026

## Sheet: DSBR by HR definition
Genes considered in the double-strand break repair by homologous recombination pathway according to the different databases
Data source	Genes
IPA	ABL, ATM, BRCA1, BRCA2, GEN1, MRE11, MRN, NBS1, RAD50, RAD51, RAD52, RAD54, RPA
BioCarta	ATM, ATR, BRCA1, BRCA2, CHEK1, FANCC, FANCD2, FANCE, FANCF, FANCG, HUSE1, MRE11, NBN, RAD1, RAD17, RAD50, RAD51, RAD9A, TP53, TREX1
Reactome	ATM, BRCA1, BRCA2, H2AX, LIG1, MDC1, MRE11, NBS1, RAD50, RAD51, RAD52, RPA1, RPA2, RPA3, TP53BP1
Cerbinskaite et al	ATM, FANCF, FANCD1, BRCA2, XRCC3, NBS1, BRCA1, RAD51, FANCJ, ATR, FANCC, MRE11, RAD50, FANCF, ATR, FANCA, FANCG
Kasparek et al	BRCA1, BRCA2, MRE11, RAD50, NBS1, ATM, ATR, FANCD2, BLM, FANCN, BRIP1, CHEK2, RAD51C, RAD51D
DNA repair Database (https://dnapittcrew.upmc.com)	BRCA1, BRCA2, DMC1, EME1, GEN1, MRE11, MUS81, NBS1, RAD21, RAD50, RAD51, RAD51C, RAD51L1, RAD51L3, RAD52, RAD54B, RAD54L, SHFM1, SMC6L1, XRCC2, XRCC3

## Sheet: Genes in the pathway
Genes involved in DSBR by HR pathway and number of times they were affected by an indel
Gene	Number of affected MMR-deficient tumors (n=16)	Affected tumor
ATM	13	1, 2, 3, 4, 6, 7, 8, 9, 10, 12, 13, 14, 16
ATR	5	2, 7, 9, 10, 14
BLM	3	6, 7, 11
BRCA1	2	4, 5
BRCA2	2	11, 12
CHEK1	2	1, 8
CHEK2	2	2, 12
FANCC	1	10
FANCD2	1	9
FANCE	2	7, 12
MRE11	8	1, 2, 3, 4, 9, 10, 12, 16
RAD17	3	8, 9, 10
RAD21	2	6, 14
RAD50	3	8, 11, 14
TOP3A	2	12, 15
XRCC2	1	11

## Sheet: TCGA dataset
Top enriched pathways for TCGA MSI datasets by IPA
input data:	genes recurrently affected by frameshift indels and by non-synonymous substitutions in CRC tumor datasets (2,183 genes)
CRC Rank	Pathway	FDR
1	Actin Cytoskeleton Signaling	0.299
	Cellular Effects of Sildenafil	0.299
3	Non-Small Cell Lung Cancer Signaling	0.39
	NGF Signaling	0.39
5	Agrin Interactions at Neuromuscular Junction	0.492
	Epithelial Adherens Junction Signaling	0.492
	Role of BRCA1 in DNA Damage Response	0.492
	ErbB4 Signaling	0.492
	Virus Entry via Endocytic Pathways	0.492
	HER-2 Signaling in Breast Cancer	0.492
	SAPK/JNK Signaling	0.492
	FAK Signaling	0.492
	RhoA Signaling	0.492
	UVC-Induced MAPK Signaling	0.492
15	MSP-RON Signaling Pathway	0.506
	Small Cell Lung Cancer Signaling	0.566
	Glioma Signaling	0.566
	Role of NANOG in Mammalian Embryonic Stem Cell Pluripotency	0.566
	Myc Mediated Apoptosis Signaling	0.566
	Molecular Mechanisms of Cancer	0.566
input data:	genes recurrently affected by frameshift indels and by non-synonymous substitutions in EM tumor datasets (3,138 genes)
EM Rank	Pathway	FDR
1	Cellular Effects of Sildenafil	0.0213
	Endometrial Cancer Signaling	0.0213
	Actin Cytoskeleton Signaling	0.0213
	Epithelial Adherens Junction Signaling	0.0213
5	Role of BRCA1 in DNA Damage Response	0.022
	RhoA Signaling	0.022
7	Paxillin Signaling	0.0395
	Reelin Signaling in Neurons	0.0395
	Breast Cancer Regulation by Stathmin1	0.0395
10	Maturity Onset Diabetes of Young (MODY) Signaling	0.047
	P53 Signaling	0.047
12	Molecular Mechanisms of Cancer	0.0484
	Acute Myeloid Leukemia Signaling	0.0484
	Axonal Guidance Signaling	0.0484
	Melanoma Signaling	0.0484
	Mouse Embryonic Stem Cell Pluripotency	0.0484
	Hereditary Breast Cancer Signaling	0.0484
	MSP-RON Signaling Pathway	0.0484
	G-alpha12/13 Signaling	0.0484
20	Glioma Signaling	0.069
